# Supplementary material for: Exploration of microRNA Biomarkers in Blood Small Extracellular Vesicles for Enzootic Bovine Leukosis
Source: Microorganisms. 2023 Aug 28;11(9):2173. doi: 10.3390/microorganisms11092173 (PMC10535767; doi:10.3390/microorganisms11092173)
Supplement: Supplementary file 1 [file microorganisms-11-02173-s001.zip › Supplementary Table S1.xlsx]

## Sheet: Table S1
	Supplementary Table S1. BLV infection and clinical status of cattle used in this study
	Cattle no.	Age (month)a	ELISA antibody	Nested PCR	Proviral loadb (copies/10⁵WBC)	WBC (/μl)		Lymphocyte			EC key	Total LDH (IU/l)		LDH isozyme (%)
								(/μl)	(%)					1	2	3	4	5	2+3
	Microarray analysis
	BLV-uninfected cattle (n = 3)
	1	78	NT	-	NT	7100		3500	49.4		-	1233		69.1	18.4	7.8	1.8	2.9	26.2
	2	38	NT	-	NT	5400		2700	49.3		-	1190		72.7	14.9	6.9	2.1	3.4	21.8
	3	25	NT	-	NT	8600		4200	48.5		-	1222		66.8	19.4	9.7	3	1.1	29.1
	EBL cattle (n = 3)
	4	88	+	+	29377	28500		18000	63		+	2734		27.4	28.8	13.4	24.4	6	42.2
	5	64	+	+	96044	23000		12700	55.2		+	2201		36	31.8	22	2.6	7.6	53.8
	6	49	+	+	63139	21200		12100	57.1		+	5401		22.6	24.5	20.9	24	8	45.4
	Validation of miRNA biomarker candidates
	BLV-uninfected cattle (n = 31)
	7	41	NT	-	NT	5400		2800	51.3		-	1304		63.9	20.2	10.9	3.7	1.3	5
	8	66	NT	-	NT	4800		2000	40.7		-	1246		68.4	17.8	9.6	3.1	1.1	4.2
	9	93	NT	-	NT	5400		2800	51.3		-	1304		65.5	18.3	10.2	3.8	2.2	6
	10	57	NT	-	NT	5400		2700	49.3		-	1190		72.7	14.9	6.9	2.1	3.4	5.5
	11	34	NT	-	NT	4800		2100	42.9		-	1331		69.9	17.1	9.4	1.8	1.8	3.6
	12	50	-	-	NT	7100		2200	31.5		-	1094		49.1	27.2	15.3	5.6	2.8	8.4
	13	72	-	-	NT	5000		1800	36		-	1380		54.8	25.9	12.6	4.2	2.5	6.7
	14	76	-	-	NT	12100		3100	25.4		-	1185		53.8	27.3	12.5	4.2	2.2	6.4
	15	90	-	-	NT	4200		1600	38		-	1269		53.3	27.1	13	4.3	2.3	6.6
	16	89	-	-	NT	4600		1600	35		-	1299		57.8	23.1	12.3	4.8	2	6.8
	17	68	-	-	NT	6200		2100	33.4		-	1317		55.1	22.8	13.4	5.8	2.9	8.7
	18	64	-	-	NT	7200		2400	33.6		-	1149		55.8	22.8	12.4	5.3	3.7	9
	19	59	-	-	NT	7400		3200	42.7		-	1493		55.9	21.8	13.1	4.9	4.3	9.2
	20	100	-	-	NT	5900		1900	32.4		-	1046		55.2	22.8	13.1	5.6	3.3	8.9
	21	104	-	-	NT	1980		1140	57.8		-	1095		54.4	27.6	13.5	3.3	1.2	4.5
	22	127	-	-	NT	5100		1700	32.6		-	1350		52.8	25.5	13.3	5	3.4	8.4
	23	114	-	-	NT	10100		3900	38.5		-	1417		69.1	18.6	8.5	2.5	1.3	3.8
	24	108	-	-	NT	6800		2000	29.7		-	1292		51.4	23.8	14.2	6.5	4.1	10.6
	25	134	-	-	NT	6300		3600	57.5		-	991		49.6	28.8	14.5	4.3	2.8	7.1
	26	100	-	-	NT	4900		2500	50.8		-	992		29	32.3	24.7	7.7	6.3	14
	27	100	-	-	NT	5600		2500	44.8		-	1190		54.5	23.8	13.9	5.4	2.4	7.8
	28	107	-	-	NT	8100		1800	21.8		-	1087		47.2	27.2	16.7	5.9	3	8.9
	29	172	-	-	NT	4600		1600	34.9		-	1093		53.5	26.2	13.9	4.5	1.9	6.4
	30	56	-	-	NT	10400		6100	58.4		-	988		64.5	19.6	11.1	3.2	1.6	4.8
	31	33	-	-	NT	9100		4400	47.9		-	1080		61.8	21.5	11.9	3.6	1.2	4.8
	32	26	NT	-	NT	8200		4300	52.2		-	1483		66.5	19.2	9.4	3.1	1.8	4.9
	33	31	NT	-	NT	6100		3200	53.2		-	1327		71.1	15.9	7.4	3.6	2	5.6
	34	78	NT	-	NT	7100		3500	49.4		-	1233		69.1	18.4	7.8	1.8	2.9	4.7
	35	81	NT	-	NT	6000		3100	52.4		-	1183		60.7	21.6	12	3.9	1.8	5.7
	36	46	NT	-	NT	8600		4200	48.5		-	1222		66.8	19.4	9.7	3	1.1	4.1
	37	17	NT	-	NT	7400		4100	56.1		-	1310		62	20.8	11.1	4.2	1.9	6.1
	EBL cattle (n = 30)
	38	109	+	+	65943	9000		5700	63.6		±	2448		25.1	40.7	25.1	7	2.1	65.8
	39	64	+	+	96044	23000		12700	55.2		+	2201		36	31.8	22	7.6	2.6	10.2
	40	72	+	+	25435	15500		8600	55.8		+	3399		28.3	36.2	26.2	8	1.3	9.3
	41	135	+	+	22622	12800		8300	64.7		+	3915		31.1	38.3	22.6	6.4	1.6	60.9
	42	49	+	+	63139	21200		12100	57.1		+	5401		22.6	24.5	20.9	8	24	32
	43	77	+	+	69048	25200		18000	71.6		+	2193		60.3	24.4	10	3.4	1.9	34.4
	44	109	+	+	55289	5100		4200	81.6		-	2766		29.9	38.3	22.5	4.8	4.5	60.8
	45	95	+	+	30482	8900		5000	56.6		-	2335		32.5	31.9	24.6	8.1	2.9	11
	46	67	+	+	13306	2800		100	5.1		-	2173		35.5	29.4	21.1	5.8	8.2	50.5
	47	48	+	+	58589	12000		6500	53.8		-	>5,000		0.6	2.2	6	10.3	80.9	8.2
	48	87	+	+	71693	9100		4500	49.6		-	4296		21.5	15.3	11.2	6.9	45.1	26.5
	49	73	+	+	836	31300		1300	4.1		-	>5,000		51.1	29.3	9.9	2.5	7.2	9.7
	50	101	+	+	38630	3100		3000	95.4		-	>5,000		34.3	29.7	12.2	4.4	19.4	23.8
	51	54	+	+	75934	5500		2200	39.6		-	2750		51.3	31	12.3	2.8	2.6	5.4
	52	86	+	+	7893	11800		8300	70.5		+	2102		43.4	24.9	11.6	2.9	17.2	20.1
	53	64	+	+	148109	53200		37400	70.3		+	>5,000		27.9	35.3	24	9.4	3.4	12.8
	54	88	+	+	173575	271500		193600	71.3		+	3795		22	28.9	29.8	14.6	4.7	58.7
	55	77	+	+	32882.4	13200		1600	12.3		-	3362		42.3	27.6	17.2	6	6.9	44.8
	56	60	+	+	54442.3	13600		7700	56.3		±	1404		56.3	23.9	11.4	5.1	3.3	35.3
	57	92	+	+	58096	5400		2700	49.1		-	4525		36.2	39.4	19.5	3.4	1.5	58.9
	58	172	+	+	56434	11700		4700	40.4		-	1881		31.2	31.9	23	9.8	4.1	54.9
	59	69	+	+	43327	14800		8400	56.7		+	3092		27.7	15.9	13.7	8.3	34.4	29.6
	60	99	+	+	45953	8900		5000	56.6		-	2128		35	29.1	13.9	8.5	3.5	43
	61	44	+	+	95951	14800		9700	65.7		+	3134		33	17.8	11.9	6.9	30.4	29.7
	62	75	+	+	3320.86	12000		2600	21.9		-	3109		28	35.9	27	5.5	3.6	62.9
	63	97	+	+	14774	11500		2400	21.2		-	4069		38.3	34.8	19.1	4.2	3.6	7.8
	64	85	+	+	14774	6900		2600	38.2		-	1321		45.3	26.1	1.7	6.9	4.7	43.1
	65	58	+	+	9566	4000		2700	67.8		-	2479		41	34.8	19	4.1	1.1	53.8
	66	100	+	+	95092	20500		8900	43.6		+	3171		41	38.3	16.1	3.6	1	4.6
	67	65	+	+	16696	12700		7100	55.6		+	1376		37.3	33.2	21.1	6.4	2	54.3
	+, positive; -, negative; ±, false positive; NT, not tested; BLV, bovine leukemia virus; ELISA, enzyme-linked immunosorbent assay; PCR, polymerase chain reaction; WBC, white blood cell; EC key, European Community’s leukosis key [44, 45]; LDH , lactate dehydrogenase; IU, international unit. a Age at blood sampling b Proviral load was measured by a CoCoMo-BLV Primer/Probe (A803, RIKEN Genesis, Toky…
