# Supplementary material for: Exploration of microRNA Biomarkers in Blood Small Extracellular Vesicles for Enzootic Bovine Leukosis
Source: Microorganisms. 2023 Aug 28;11(9):2173. doi: 10.3390/microorganisms11092173 (PMC10535767; doi:10.3390/microorganisms11092173)
Supplement: Supplementary file 1 [file microorganisms-11-02173-s001.zip › Supplementary Table S2.xlsx]

## Sheet: Supplementary Table S2
Supplementary Table S2. Raw data of microarray analysis
		Sample name
	Test	L1, L2, L3
	Control	C1, C2, C3
	Test Group									Control Group
Feature ID	L1			L2			L3			C1			C2			C3			Comparison					Flag		Annotation
Probe Set ID	Expression value	Transformed value	Quality flag	Expression value	Transformed value	Quality flag	Expression value	Transformed value	Quality flag	Expression value	Transformed value	Quality flag	Expression value	Transformed value	Quality flag	Expression value	Transformed value	Quality flag	Average value {test}	Average value {control}	Ratio	Log2Ratio	P-value	Quality flag all	解析対象 flag	Sequence Type	Sequence Source	Species Scientific Name	Transcript ID(Array Design)	Alignments	Sequence Length	Sequence	Probe Set Name	Accession	Genome Context	Clustered miRNAs within 10kb
20500000	1.75612	-0.21306	P	3.40182	0.74085	P	1.67699	-0.27958	P	2.31509	0.18561	P	2.31509	0.18561	P	1.58666	-0.35947	P	2.27831	2.07228	1.09942	0.136745	0.844362	PP	0	miRNA	miRBase	Caenorhabditis elegans	cel-let-7-5p	X:14744165-14744186 (-)	22	UGAGGUAGUAGGUUGUAUAGUU	MIMAT0000001_st	MIMAT0000001	C05G5.6 // sense // exon // 1	---
20500001	1.20666	-0.15427	A	1.05048	-0.35424	A	1.28518	-0.06332	A	1.40051	0.06066	P	1.45768	0.11838	A	1.46066	0.12133	A	1.18077	1.43962	0.8202	-0.285953	0.029997	PA	0	miRNA	miRBase	Caenorhabditis elegans	cel-let-7-3p	X:14744123-14744147 (-)	25	UGAACUAUGCAAUUUUCUACCUUAC	MIMAT0015091_st	MIMAT0015091	C05G5.6 // sense // exon // 1	---
20500002	1.29241	0	A	1.12251	-0.20333	A	1.29241	0	A	1.51138	0.2258	A	1.15759	-0.15893	A	1.88134	0.5417	A	1.23578	1.51677	0.814742	-0.295584	0.273935	AA	0	miRNA	miRBase	Caenorhabditis elegans	cel-lin-4-5p	II:5902246-5902266 (+)	21	UCCCUGAGACCUCAAGUGUGA	MIMAT0000002_st	MIMAT0000002	F59G1.10 // antisense // exon // 1 /// F59G1.4 // sense // intron // 9 /// F59G1.6 // sense // exon // 1	---
20500003	1.34398	0.16825	A	1.44588	0.27368	A	1.24281	0.05535	A	1.14926	-0.05756	A	1.10768	-0.11072	A	0.981	-0.28594	A	1.34422	1.07931	1.24544	0.316659	0.027437	AA	0	miRNA	miRBase	Caenorhabditis elegans	cel-lin-4-3p	II:5902285-5902305 (+)	21	ACACCUGGGCUCUCCGGGUAC	MIMAT0015092_st	MIMAT0015092	F59G1.10 // antisense // exon // 1 /// F59G1.4 // sense // intron // 9 /// F59G1.6 // sense // exon // 1	---
20500004	1.32704	0.03472	A	1.37232	0.08313	A	1.26392	-0.03558	A	1.65753	0.35555	A	1.26392	-0.03558	A	1.136	-0.18953	A	1.32109	1.35248	0.976791	-0.0338784	0.927541	AA	0	miRNA	miRBase	Caenorhabditis elegans	cel-miR-1-5p	I:6172718-6172739 (-)	22	CAUACUUCCUUACAUGCCCAUA	MIMAT0020301_st	MIMAT0020301	T09B4.11 // sense // exon // 1 /// T09B4.14 // antisense // exon // 1	---
20500005	1.08115	0	A	0.99977	-0.1129	A	1.14521	0.08304	A	1.08115	0	A	1.02068	-0.08304	A	1.16916	0.1129	A	1.07538	1.09033	0.986285	-0.0199228	0.816382	AA	0	miRNA	miRBase	Caenorhabditis elegans	cel-miR-1-3p	I:6172679-6172699 (-)	21	UGGAAUGUAAAGAAGUAUGUA	MIMAT0000003_st	MIMAT0000003	T09B4.11 // sense // exon // 1 /// T09B4.14 // antisense // exon // 1	---
20500006	1.379	0.01819	A	1.49869	0.13827	A	1.09559	-0.31373	A	2.13437	0.64838	P	1.34445	-0.01842	A	1.24415	-0.13028	A	1.32443	1.57432	0.841267	-0.249364	0.475094	PA	0	miRNA	miRBase	Caenorhabditis elegans	cel-miR-2-5p	I:9372817-9372838 (-)	22	CAUCAAAGCGGUGGUUGAUGUG	MIMAT0020302_st	MIMAT0020302	F16A11.3a.1 // sense // intron // 5 /// F16A11.3a.2 // sense // intron // 5 /// F16A11.3b.1 // sense // intron // 5 /// F16A11.3b.2 // sense // intron // 5 /// F16A11.3c.1 // sense // intron // 5 /// F16A11.3c.2 // sense // intron // 5 /// F16A11.3d // sense // intron // 8 /// M04C9.7 // sense // exon // 1	cel-mir-2 // I:9372760-9372857 (-) /// cel-mir-71 // I:9379919-9380012 (-)
20500007	1.20131	-0.03971	A	1.33399	0.11143	A	1.33399	0.11143	A	1.1266	-0.13235	A	1.26757	0.03775	A	1.2021	-0.03876	A	1.28976	1.19876	1.07592	0.105568	0.208391	AA	0	miRNA	miRBase	Caenorhabditis elegans	cel-miR-2-3p	I:9372775-9372797 (-)	23	UAUCACAGCCAGCUUUGAUGUGC	MIMAT0000004_st	MIMAT0000004	F16A11.3a.1 // sense // intron // 5 /// F16A11.3a.2 // sense // intron // 5 /// F16A11.3b.1 // sense // intron // 5 /// F16A11.3b.2 // sense // intron // 5 /// F16A11.3c.1 // sense // intron // 5 /// F16A11.3c.2 // sense // intron // 5 /// F16A11.3d // sense // intron // 8 /// M04C9.7 // sense // exon // 1	cel-mir-2 // I:9372760-9372857 (-) /// cel-mir-71 // I:9379919-9380012 (-)
20500008	1.3616	-0.05155	A	1.13123	-0.31896	A	1.46066	0.04977	A	1.79245	0.34508	P	1.21915	-0.21098	A	1.61896	0.19822	A	1.31783	1.54352	0.853782	-0.22806	0.336389	PA	0	miRNA	miRBase	Caenorhabditis elegans	cel-miR-34-5p	X:2969802-2969823 (-)	22	AGGCAGUGUGGUUAGCUGGUUG	MIMAT0000005_st	MIMAT0000005	Y41G9A.7 // sense // exon // 1	---
20500009	1.38975	-0.08329	A	1.48402	0.0114	A	1.32344	-0.15382	A	1.46066	-0.01149	A	1.6379	0.15373	A	1.7098	0.21571	A	1.39907	1.60279	0.872898	-0.196114	0.0790279	AA	0	miRNA	miRBase	Caenorhabditis elegans	cel-miR-34-3p	X:2969765-2969786 (-)	22	ACGGCUACCUUCACUGCCACCC	MIMAT0015093_st	MIMAT0015093	Y41G9A.7 // sense // exon // 1	---
20500010	1.22847	0	A	1.13019	-0.12029	A	1.1783	-0.06014	A	1.30125	0.08304	A	1.41554	0.20449	A	1.22847	0	A	1.17899	1.31509	0.896509	-0.15761	0.0859452	AA	0	miRNA	miRBase	Caenorhabditis elegans	cel-miR-35-5p	II:11537565-11537587 (+)	23	UGCUGGUUUCUUCCACAGUGGUA	MIMAT0020303_st	MIMAT0020303	Y62F5A.16 // sense // exon // 1 /// Y62F5A.2 // sense // exon // 1 /// Y62F5A.9 // antisense // intron // 2	cel-mir-35 // II:11537544-11537640 (+) /// cel-mir-36 // II:11537649-11537745 (+) /// cel-mir-37 // II:11537769-11537866 (+) /// cel-mir-38 // II:11537869-11537963 (+) /// cel-mir-39 // II:11538025-11538111 (+) /// cel-mir-40 // II:11538120-11538211 (+) /// cel-mir-41 // II:11538244-11538340 (+)
20500011	1.39511	0.14008	A	1.0854	-0.22208	A	1.26274	-0.00374	A	1.50129	0.24591	A	0.96738	-0.38815	A	1.26929	0.00373	A	1.24775	1.24599	1.00142	0.00204027	0.938034	AA	0	miRNA	miRBase	Caenorhabditis elegans	cel-miR-35-3p	II:11537604-11537625 (+)	22	UCACCGGGUGGAAACUAGCAGU	MIMAT0000006_st	MIMAT0000006	Y62F5A.16 // sense // exon // 1 /// Y62F5A.2 // sense // exon // 1 /// Y62F5A.9 // antisense // intron // 2	cel-mir-35 // II:11537544-11537640 (+) /// cel-mir-36 // II:11537649-11537745 (+) /// cel-mir-37 // II:11537769-11537866 (+) /// cel-mir-38 // II:11537869-11537963 (+) /// cel-mir-39 // II:11538025-11538111 (+) /// cel-mir-40 // II:11538120-11538211 (+) /// cel-mir-41 // II:11538244-11538340 (+)
20500012	1.22419	0.1847	A	1.07708	0	A	0.96281	-0.16181	A	1.07708	0	A	1.07708	0	A	1.07708	0	A	1.08803	1.07708	1.01016	0.0145885	0.942898	AA	0	miRNA	miRBase	Caenorhabditis elegans	cel-miR-36-5p	II:11537668-11537690 (+)	23	CGCCAAUUUUCGCUUCAGUGCUA	MIMAT0020304_st	MIMAT0020304	Y62F5A.2 // sense // exon // 1 /// Y62F5A.3 // sense // exon // 1 /// Y62F5A.9 // antisense // intron // 2	cel-mir-35 // II:11537544-11537640 (+) /// cel-mir-36 // II:11537649-11537745 (+) /// cel-mir-37 // II:11537769-11537866 (+) /// cel-mir-38 // II:11537869-11537963 (+) /// cel-mir-39 // II:11538025-11538111 (+) /// cel-mir-40 // II:11538120-11538211 (+) /// cel-mir-41 // II:11538244-11538340 (+)
20500013	1.11068	-0.05261	A	1.22847	0.09281	A	0.9488	-0.27987	A	1.27749	0.14926	A	1.05048	-0.13299	A	1.19317	0.05076	A	1.09598	1.17371	0.933774	-0.0988542	0.495195	AA	0	miRNA	miRBase	Caenorhabditis elegans	cel-miR-36-3p	II:11537709-11537730 (+)	22	UCACCGGGUGAAAAUUCGCAUG	MIMAT0000007_st	MIMAT0000007	Y62F5A.2 // sense // exon // 1 /// Y62F5A.3 // sense // exon // 1 /// Y62F5A.9 // antisense // intron // 2	cel-mir-35 // II:11537544-11537640 (+) /// cel-mir-36 // II:11537649-11537745 (+) /// cel-mir-37 // II:11537769-11537866 (+) /// cel-mir-38 // II:11537869-11537963 (+) /// cel-mir-39 // II:11538025-11538111 (+) /// cel-mir-40 // II:11538120-11538211 (+) /// cel-mir-41 // II:11538244-11538340 (+)
20500014	1.75531	0.50964	A	1.0925	-0.17445	A	1.26949	0.04217	A	0.99033	-0.3161	A	1.19636	-0.04344	A	1.29841	0.07466	A	1.37243	1.1617	1.1814	0.240499	0.39647	AA	0	miRNA	miRBase	Caenorhabditis elegans	cel-miR-37-5p	II:11537790-11537810 (+)	21	UGUGGGUGUCCGUUGCGGUGC	MIMAT0015094_st	MIMAT0015094	Y62F5A.14 // sense // exon // 1 /// Y62F5A.3 // sense // exon // 1 /// Y62F5A.4 // sense // exon // 1 /// Y62F5A.9 // antisense // intron // 2	cel-mir-35 // II:11537544-11537640 (+) /// cel-mir-36 // II:11537649-11537745 (+) /// cel-mir-37 // II:11537769-11537866 (+) /// cel-mir-38 // II:11537869-11537963 (+) /// cel-mir-39 // II:11538025-11538111 (+) /// cel-mir-40 // II:11538120-11538211 (+) /// cel-mir-41 // II:11538244-11538340 (+)
20500015	1.00979	-0.15022	A	1.57625	0.49223	A	1.22847	0.13259	A	1.05048	-0.09322	A	1.05048	-0.09322	A	1.19072	0.08756	A	1.2715	1.09723	1.15883	0.212674	0.383372	AA	0	miRNA	miRBase	Caenorhabditis elegans	cel-miR-37-3p	II:11537829-11537850 (+)	22	UCACCGGGUGAACACUUGCAGU	MIMAT0000008_st	MIMAT0000008	Y62F5A.14 // sense // exon // 1 /// Y62F5A.3 // sense // exon // 1 /// Y62F5A.4 // sense // exon // 1 /// Y62F5A.9 // antisense // intron // 2	cel-mir-35 // II:11537544-11537640 (+) /// cel-mir-36 // II:11537649-11537745 (+) /// cel-mir-37 // II:11537769-11537866 (+) /// cel-mir-38 // II:11537869-11537963 (+) /// cel-mir-39 // II:11538025-11538111 (+) /// cel-mir-40 // II:11538120-11538211 (+) /// cel-mir-41 // II:11538244-11538340 (+)
20500016	1.05048	0	A	1.05048	0	A	1.05048	0	A	1.05048	0	A	0.93626	-0.16607	A	1.05048	0	A	1.05048	1.01241	1.03761	0.0532598	0.373901	AA	0	miRNA	miRBase	Caenorhabditis elegans	cel-miR-38-5p	II:11537885-11537906 (+)	22	UCCGGUUUUUUCCGUGGUGAUA	MIMAT0020305_st	MIMAT0020305	Y62F5A.14 // sense // exon // 1 /// Y62F5A.4 // sense // exon // 1 /// Y62F5A.5 // sense // exon // 1 /// Y62F5A.9 // antisense // intron // 2	cel-mir-35 // II:11537544-11537640 (+) /// cel-mir-36 // II:11537649-11537745 (+) /// cel-mir-37 // II:11537769-11537866 (+) /// cel-mir-38 // II:11537869-11537963 (+) /// cel-mir-39 // II:11538025-11538111 (+) /// cel-mir-40 // II:11538120-11538211 (+) /// cel-mir-41 // II:11538244-11538340 (+)
20500017	1.38479	0.1031	A	1.22847	-0.06971	A	1.67699	0.37931	A	1.3501	0.0665	A	1.11779	-0.20592	A	1.11999	-0.20309	A	1.43008	1.19596	1.19576	0.25793	0.188384	AA	0	miRNA	miRBase	Caenorhabditis elegans	cel-miR-38-3p	II:11537926-11537947 (+)	22	UCACCGGGAGAAAAACUGGAGU	MIMAT0000009_st	MIMAT0000009	Y62F5A.14 // sense // exon // 1 /// Y62F5A.4 // sense // exon // 1 /// Y62F5A.5 // sense // exon // 1 /// Y62F5A.9 // antisense // intron // 2	cel-mir-35 // II:11537544-11537640 (+) /// cel-mir-36 // II:11537649-11537745 (+) /// cel-mir-37 // II:11537769-11537866 (+) /// cel-mir-38 // II:11537869-11537963 (+) /// cel-mir-39 // II:11538025-11538111 (+) /// cel-mir-40 // II:11538120-11538211 (+) /// cel-mir-41 // II:11538244-11538340 (+)
20500018	1.136	0	A	1.136	0	A	1.22595	0.10995	A	1.136	0	A	1.09265	-0.05612	A	1.51895	0.41912	A	1.16598	1.2492	0.933384	-0.0994573	0.613796	AA	0	miRNA	miRBase	Caenorhabditis elegans	cel-miR-39-5p	II:11538039-11538060 (+)	22	AGCUGAUUUCGUCUUGGUAAUA	MIMAT0020306_st	MIMAT0020306	Y62F5A.15 // sense // exon // 1 /// Y62F5A.5 // sense // exon // 1 /// Y62F5A.6 // sense // exon // 1 /// Y62F5A.9 // antisense // intron // 2	cel-mir-35 // II:11537544-11537640 (+) /// cel-mir-36 // II:11537649-11537745 (+) /// cel-mir-37 // II:11537769-11537866 (+) /// cel-mir-38 // II:11537869-11537963 (+) /// cel-mir-39 // II:11538025-11538111 (+) /// cel-mir-40 // II:11538120-11538211 (+) /// cel-mir-41 // II:11538244-11538340 (+)
20500019	1.08383	0	A	1.31842	0.28267	A	1.06238	-0.02884	A	1.08383	0	A	1.05048	-0.04508	A	1.24787	0.20333	A	1.15488	1.12739	1.02438	0.0347478	0.811893	AA	0	miRNA	miRBase	Caenorhabditis elegans	cel-miR-39-3p	II:11538079-11538100 (+)	22	UCACCGGGUGUAAAUCAGCUUG	MIMAT0000010_st	MIMAT0000010	Y62F5A.15 // sense // exon // 1 /// Y62F5A.5 // sense // exon // 1 /// Y62F5A.6 // sense // exon // 1 /// Y62F5A.9 // antisense // intron // 2	cel-mir-35 // II:11537544-11537640 (+) /// cel-mir-36 // II:11537649-11537745 (+) /// cel-mir-37 // II:11537769-11537866 (+) /// cel-mir-38 // II:11537869-11537963 (+) /// cel-mir-39 // II:11538025-11538111 (+) /// cel-mir-40 // II:11538120-11538211 (+) /// cel-mir-41 // II:11538244-11538340 (+)
20500020	1.25928	-0.04915	A	1.23605	-0.07601	A	1.52164	0.22389	A	0.98514	-0.40335	A	1.34655	0.04753	A	1.37063	0.0731	A	1.33899	1.23411	1.08499	0.117678	0.52324	AA	0	miRNA	miRBase	Caenorhabditis elegans	cel-miR-40-5p	II:11538135-11538157 (+)	23	AGUGGAUGUAUGCCAUGAUGAUA	MIMAT0020307_st	MIMAT0020307	Y62F5A.15 // sense // exon // 1 /// Y62F5A.6 // sense // exon // 1 /// Y62F5A.7 // sense // exon // 1 /// Y62F5A.9 // antisense // intron // 2	cel-mir-35 // II:11537544-11537640 (+) /// cel-mir-36 // II:11537649-11537745 (+) /// cel-mir-37 // II:11537769-11537866 (+) /// cel-mir-38 // II:11537869-11537963 (+) /// cel-mir-39 // II:11538025-11538111 (+) /// cel-mir-40 // II:11538120-11538211 (+) /// cel-mir-41 // II:11538244-11538340 (+)
20500021	1.05502	-0.17934	A	1.22847	0.04025	A	1.19467	0	A	1.19467	0	A	1.04295	-0.19594	A	1.36846	0.19594	A	1.15939	1.20203	0.964527	-0.0521071	0.742628	AA	0	miRNA	miRBase	Caenorhabditis elegans	cel-miR-40-3p	II:11538175-11538196 (+)	22	UCACCGGGUGUACAUCAGCUAA	MIMAT0000011_st	MIMAT0000011	Y62F5A.15 // sense // exon // 1 /// Y62F5A.6 // sense // exon // 1 /// Y62F5A.7 // sense // exon // 1 /// Y62F5A.9 // antisense // intron // 2	cel-mir-35 // II:11537544-11537640 (+) /// cel-mir-36 // II:11537649-11537745 (+) /// cel-mir-37 // II:11537769-11537866 (+) /// cel-mir-38 // II:11537869-11537963 (+) /// cel-mir-39 // II:11538025-11538111 (+) /// cel-mir-40 // II:11538120-11538211 (+) /// cel-mir-41 // II:11538244-11538340 (+)
20500022	1.13945	0	A	1.33251	0.2258	A	1.13945	0	A	1.13945	0	A	0.95648	-0.25254	A	1.42979	0.32747	A	1.2038	1.17524	1.0243	0.0346443	0.798131	AA	0	miRNA	miRBase	Caenorhabditis elegans	cel-miR-41-5p	II:11538260-11538282 (+)	23	GGUGGUUUUUCUCUGCAGUGAUA	MIMAT0020770_st	MIMAT0020770	Y62F5A.7 // sense // exon // 1 /// Y62F5A.8 // sense // exon // 1 /// Y62F5A.9 // antisense // intron // 2	cel-mir-35 // II:11537544-11537640 (+) /// cel-mir-36 // II:11537649-11537745 (+) /// cel-mir-37 // II:11537769-11537866 (+) /// cel-mir-38 // II:11537869-11537963 (+) /// cel-mir-39 // II:11538025-11538111 (+) /// cel-mir-40 // II:11538120-11538211 (+) /// cel-mir-41 // II:11538244-11538340 (+)
20500023	0.8844	-0.50045	A	1.25113	0	A	1.41585	0.17844	A	1.15795	-0.11166	A	1.25113	0	A	1.25113	0	A	1.18379	1.22007	0.970267	-0.0435467	0.751357	AA	0	miRNA	miRBase	Caenorhabditis elegans	cel-miR-41-3p	II:11538304-11538325 (+)	22	UCACCGGGUGAAAAAUCACCUA	MIMAT0000012_st	MIMAT0000012	Y62F5A.7 // sense // exon // 1 /// Y62F5A.8 // sense // exon // 1 /// Y62F5A.9 // antisense // intron // 2	cel-mir-35 // II:11537544-11537640 (+) /// cel-mir-36 // II:11537649-11537745 (+) /// cel-mir-37 // II:11537769-11537866 (+) /// cel-mir-38 // II:11537869-11537963 (+) /// cel-mir-39 // II:11538025-11538111 (+) /// cel-mir-40 // II:11538120-11538211 (+) /// cel-mir-41 // II:11538244-11538340 (+)
20500024	1.11433	-0.03047	A	1.19176	0.06644	A	1.00439	-0.18033	A	2.17157	0.93209	P	1.1619	0.02984	A	1.06879	-0.09066	A	1.10349	1.46742	0.751996	-0.411204	0.363712	PA	0	miRNA	miRBase	Caenorhabditis elegans	cel-miR-42-5p	II:11889761-11889785 (+)	25	GUGGGUGUUUGCUUUUUCGGUGAAG	MIMAT0015095_st	MIMAT0015095	ZK930.12 // antisense // exon // 1 /// ZK930.8 // sense // exon // 1	cel-mir-42 // II:11889748-11889842 (+) /// cel-mir-43 // II:11889847-11889944 (+) /// cel-mir-44 // II:11889960-11890055 (+) /// cel-mir-45 // II:11880881-11880976 (-)
20500025	1.06321	-0.06914	A	1.22369	0.13367	A	1.01412	-0.13735	A	1.1676	0.06598	A	1.0464	-0.09214	A	1.26872	0.1858	A	1.10034	1.16091	0.947828	-0.0773026	0.535566	AA	0	miRNA	miRBase	Caenorhabditis elegans	cel-miR-42-3p	II:11889807-11889828 (+)	22	UCACCGGGUUAACAUCUACAGA	MIMAT0000013_st	MIMAT0000013	ZK930.12 // antisense // exon // 1 /// ZK930.8 // sense // exon // 1	cel-mir-42 // II:11889748-11889842 (+) /// cel-mir-43 // II:11889847-11889944 (+) /// cel-mir-44 // II:11889960-11890055 (+) /// cel-mir-45 // II:11880881-11880976 (-)
20500026	1.21569	-0.15893	A	1.67931	0.30716	A	1.31373	-0.04705	A	1.31373	-0.04705	A	1.40082	0.04556	A	1.44548	0.09083	A	1.40291	1.38668	1.01171	0.016791	0.979778	AA	0	miRNA	miRBase	Caenorhabditis elegans	cel-miR-43-5p	II:11889867-11889890 (+)	24	GACAUCAAGAAACUAGUGAUUAUG	MIMAT0020308_st	MIMAT0020308	ZK930.12 // antisense // exon // 1 /// ZK930.8 // sense // exon // 1 /// ZK930.9 // sense // exon // 1	cel-mir-42 // II:11889748-11889842 (+) /// cel-mir-43 // II:11889847-11889944 (+) /// cel-mir-44 // II:11889960-11890055 (+) /// cel-mir-45 // II:11880881-11880976 (-)
20500027	1.22847	0	A	1.22847	0	A	1.22847	0	A	1.05048	-0.2258	A	1.05048	-0.2258	A	1.22847	0	A	1.22847	1.10981	1.10692	0.14655	0.116117	AA	0	miRNA	miRBase	Caenorhabditis elegans	cel-miR-43-3p	II:11889907-11889929 (+)	23	UAUCACAGUUUACUUGCUGUCGC	MIMAT0000014_st	MIMAT0000014	ZK930.12 // antisense // exon // 1 /// ZK930.8 // sense // exon // 1 /// ZK930.9 // sense // exon // 1	cel-mir-42 // II:11889748-11889842 (+) /// cel-mir-43 // II:11889847-11889944 (+) /// cel-mir-44 // II:11889960-11890055 (+) /// cel-mir-45 // II:11880881-11880976 (-)
20500028	1.22847	0	A	1.22847	0	A	1.22847	0	A	1.22847	0	A	1.22847	0	A	1.45461	0.24378	A	1.22847	1.30385	0.942187	-0.0859153	0.373901	AA	0	miRNA	miRBase	Caenorhabditis elegans	cel-miR-44-5p	II:11889975-11889996 (+)	22	CUGGAUGUGCUCGUUGGUCAUA	MIMAT0020771_st	MIMAT0020771	ZK930.10 // sense // exon // 1 /// ZK930.12 // antisense // exon // 1 /// ZK930.9 // sense // exon // 1	cel-mir-42 // II:11889748-11889842 (+) /// cel-mir-43 // II:11889847-11889944 (+) /// cel-mir-44 // II:11889960-11890055 (+) /// cel-mir-45 // II:11880881-11880976 (-)
20500029	0.88979	-0.298	A	1.1374	0.0562	A	1.05048	-0.05848	A	1.42939	0.38587	A	1.04875	-0.06086	A	1.22847	0.16732	A	1.02589	1.23554	0.830319	-0.268262	0.186464	AA	0	miRNA	miRBase	Caenorhabditis elegans	cel-miR-44-3p	II:11890020-11890040 (+)	21	UGACUAGAGACACAUUCAGCU	MIMAT0000015_st	MIMAT0000015	ZK930.10 // sense // exon // 1 /// ZK930.12 // antisense // exon // 1 /// ZK930.9 // sense // exon // 1	cel-mir-42 // II:11889748-11889842 (+) /// cel-mir-43 // II:11889847-11889944 (+) /// cel-mir-44 // II:11889960-11890055 (+) /// cel-mir-45 // II:11880881-11880976 (-)
20500030	1.20467	0.09541	A	1.03013	-0.13039	A	0.91054	-0.30843	A	1.21132	0.10335	A	1.21132	0.10335	A	1.05048	-0.10217	A	1.04845	1.15771	0.905624	-0.143016	0.332168	AA	0	miRNA	miRBase	Caenorhabditis elegans	cel-miR-45-5p	II:11880941-11880962 (-)	22	CUGGAUGUGCUCGUUAGUCAUA	MIMAT0020772_st	MIMAT0020772	ZK930.11 // sense // exon // 1 /// ZK930.13 // antisense // exon // 1	cel-mir-42 // II:11889748-11889842 (+) /// cel-mir-43 // II:11889847-11889944 (+) /// cel-mir-44 // II:11889960-11890055 (+) /// cel-mir-45 // II:11880881-11880976 (-)
20500031	0.88979	-0.298	A	1.1374	0.0562	A	1.05048	-0.05848	A	1.42939	0.38587	A	1.04875	-0.06086	A	1.22847	0.16732	A	1.02589	1.23554	0.830319	-0.268262	0.186464	AA	0	miRNA	miRBase	Caenorhabditis elegans	cel-miR-45-3p	II:11880896-11880916 (-)	21	UGACUAGAGACACAUUCAGCU	MIMAT0000016_st	MIMAT0000016	ZK930.11 // sense // exon // 1 /// ZK930.13 // antisense // exon // 1	cel-mir-42 // II:11889748-11889842 (+) /// cel-mir-43 // II:11889847-11889944 (+) /// cel-mir-44 // II:11889960-11890055 (+) /// cel-mir-45 // II:11880881-11880976 (-)
20500032	1.22847	0.10849	A	1.48402	0.38115	A	1.47152	0.36894	P	1.03077	-0.14465	A	1.05048	-0.11732	A	1.05048	-0.11732	A	1.39467	1.04391	1.33601	0.417926	0.00991004	PA	0	miRNA	miRBase	Caenorhabditis elegans	cel-miR-46-5p	III:13660428-13660449 (+)	22	AAGAGAGCCGUCUAUUGACAGU	MIMAT0015096_st	MIMAT0015096	---	---
20500033	0.97793	-0.36523	A	0.98009	-0.36205	A	1.16044	-0.11836	A	1.35887	0.10938	A	1.38153	0.13323	A	1.56903	0.31685	A	1.03949	1.43648	0.723636	-0.466663	0.0110797	AA	0	miRNA	miRBase	Caenorhabditis elegans	cel-miR-46-3p	III:13660474-13660495 (+)	22	UGUCAUGGAGUCGCUCUCUUCA	MIMAT0000017_st	MIMAT0000017	---	---
20500034	1.21168	0.0732	A	1.09475	-0.0732	A	1.0587	-0.12151	A	1.15173	0	A	1.15173	0	A	1.15173	0	A	1.12171	1.15173	0.973935	-0.0381028	0.527046	AA	0	miRNA	miRBase	Caenorhabditis elegans	cel-miR-47-5p	X:13921200-13921221 (+)	22	AAGAGAGCAGUCUAUUGACAGU	MIMAT0015097_st	MIMAT0015097	K02B9.5 // sense // exon // 1	---
20500035	1.27788	0.18965	A	1.12047	0	A	1.13199	0.01475	A	0.97318	-0.20333	A	1.12047	0	A	1.12047	0	A	1.17678	1.07137	1.09838	0.135383	0.210093	AA	0	miRNA	miRBase	Caenorhabditis elegans	cel-miR-47-3p	X:13921242-13921263 (+)	22	UGUCAUGGAGGCGCUCUCUUCA	MIMAT0000018_st	MIMAT0000018	K02B9.5 // sense // exon // 1	---
20500036	1.41685	0.04315	A	1.17643	-0.22512	A	1.3751	0	A	1.3049	-0.0756	A	1.75515	0.35205	A	1.3751	0	A	1.32279	1.47838	0.894757	-0.160433	0.382287	AA	0	miRNA	miRBase	Caenorhabditis elegans	cel-miR-48-5p	V:14364457-14364479 (-)	23	UGAGGUAGGCUCAGUAGAUGCGA	MIMAT0000019_st	MIMAT0000019	F56A12.3 // sense // exon // 1	cel-mir-48 // V:14364397-14364494 (-) /// cel-mir-241 // V:14366173-14366268 (-)
20500037	1.26603	-0.18757	A	1.14985	-0.32644	A	1.42598	-0.01593	A	1.74989	0.27938	A	1.45765	0.01575	A	1.50304	0.06	A	1.28062	1.57019	0.815581	-0.2941	0.0717767	AA	0	miRNA	miRBase	Caenorhabditis elegans	cel-miR-48-3p	V:14364420-14364441 (-)	22	ACAUCCACCAGCCUAGCUCGCA	MIMAT0015098_st	MIMAT0015098	F56A12.3 // sense // exon // 1	cel-mir-48 // V:14364397-14364494 (-) /// cel-mir-241 // V:14366173-14366268 (-)
20500038	1.21893	0.00847	A	1.42545	0.23427	A	1.23763	0.03043	A	1.20467	-0.00852	A	1.10306	-0.13564	A	1.05048	-0.2061	A	1.294	1.1194	1.15598	0.209111	0.0873881	AA	0	miRNA	miRBase	Caenorhabditis elegans	cel-miR-49-5p	X:9989244-9989266 (+)	23	CGCAGUUUGUUGUGAUGUGCUCC	MIMAT0020309_st	MIMAT0020309	F19C6.6 // sense // exon // 1	---
20500039	1.33954	0	A	1.33954	0	A	1.46066	0.12488	A	1.19118	-0.16935	A	1.33954	0	A	1.22847	-0.12488	A	1.37991	1.25306	1.10123	0.139118	0.100222	AA	0	miRNA	miRBase	Caenorhabditis elegans	cel-miR-49-3p	X:9989284-9989305 (+)	22	AAGCACCACGAGAAGCUGCAGA	MIMAT0000020_st	MIMAT0000020	F19C6.6 // sense // exon // 1	---
20500040	0.95818	-0.35848	A	1.22847	0	A	1.50718	0.295	A	1.22847	0	A	1.05048	-0.2258	A	1.25274	0.02823	A	1.23128	1.17723	1.04591	0.0647588	0.838325	AA	0	miRNA	miRBase	Caenorhabditis elegans	cel-miR-50-5p	I:1738652-1738675 (+)	24	UGAUAUGUCUGGUAUUCUUGGGUU	MIMAT0000021_st	MIMAT0000021	Y71G12B.11a // sense // intron // 8 /// Y71G12B.11c // sense // intron // 4 /// Y71G12B.29 // sense // exon // 1 /// Y71G12B.36 // antisense // exon // 1	---
20500041	1.25082	-0.27095	A	2.10848	0.48237	P	1.67699	0.15205	P	1.00328	-0.5891	A	1.41913	-0.08882	A	1.59936	0.08367	A	1.67876	1.34059	1.25226	0.324531	0.342997	PA	0	miRNA	miRBase	Caenorhabditis elegans	cel-miR-50-3p	I:1738694-1738715 (+)	22	CCCGCAUAUUAGACGUAUCGAC	MIMAT0020310_st	MIMAT0020310	Y71G12B.11a // sense // intron // 8 /// Y71G12B.11c // sense // intron // 4 /// Y71G12B.29 // sense // exon // 1 /// Y71G12B.36 // antisense // exon // 1	---
20500042	1.21776	-0.275	A	1.26001	-0.2258	A	1.47349	0	A	1.69326	0.20057	A	1.56188	0.08405	A	1.47349	0	A	1.31709	1.57621	0.835604	-0.259109	0.0633789	AA	0	miRNA	miRBase	Caenorhabditis elegans	cel-miR-51-5p	IV:11026053-11026075 (-)	23	UACCCGUAGCUCCUAUCCAUGUU	MIMAT0000022_st	MIMAT0000022	F36H1.7 // sense // exon // 1	cel-mir-51 // IV:11025992-11026091 (-) /// cel-mir-53 // IV:11027572-11027670 (-)
20500043	1.20447	0.01114	A	1.01412	-0.23703	A	1.08824	-0.13526	A	1.27252	0.09043	A	1.18594	-0.01123	A	1.22847	0.0396	A	1.10228	1.22898	0.896906	-0.156971	0.108821	AA	0	miRNA	miRBase	Caenorhabditis elegans	cel-miR-51-3p	IV:11026014-11026035 (-)	22	CAUGGAAGCAGGUACAGGUGCA	MIMAT0015099_st	MIMAT0015099	F36H1.7 // sense // exon // 1	cel-mir-51 // IV:11025992-11026091 (-) /// cel-mir-53 // IV:11027572-11027670 (-)
20500044	1.20561	-0.0565	A	1.27039	0.019	A	1.23588	-0.02073	A	1.79574	0.51831	P	1.23715	-0.01925	A	1.53441	0.29142	A	1.23729	1.52243	0.812708	-0.299191	0.146543	PA	0	miRNA	miRBase	Caenorhabditis elegans	cel-miR-52-5p	IV:14033999-14034022 (+)	24	CACCCGUACAUAUGUUUCCGUGCU	MIMAT0000023_st	MIMAT0000023	Y37A1B.16 // sense // exon // 1 /// Y37A1B.330 // sense // exon // 1 /// Y37A1B.335 // antisense // exon // 1	---
20500045	1.05048	-0.15633	A	1.33638	0.19095	A	1.26139	0.10762	A	1.08004	-0.11631	A	1.07584	-0.12193	A	1.26139	0.10762	A	1.21608	1.13909	1.06759	0.0943604	0.520038	AA	0	miRNA	miRBase	Caenorhabditis elegans	cel-miR-52-3p	IV:14034040-14034061 (+)	22	CACGUUACAAUGAAAGGGUAGC	MIMAT0020311_st	MIMAT0020311	Y37A1B.16 // sense // exon // 1 /// Y37A1B.330 // sense // exon // 1 /// Y37A1B.335 // antisense // exon // 1	---
20500046	1.22847	0	A	1.22847	0	A	1.22847	0	A	1.1278	-0.12334	A	1.05048	-0.2258	A	1.79245	0.54508	P	1.22847	1.32358	0.928144	-0.107579	0.800366	PA	0	miRNA	miRBase	Caenorhabditis elegans	cel-miR-53-5p	IV:11027632-11027655 (-)	24	CACCCGUACAUUUGUUUCCGUGCU	MIMAT0000024_st	MIMAT0000024	F36H1.8 // sense // exon // 1	cel-mir-51 // IV:11025992-11026091 (-) /// cel-mir-53 // IV:11027572-11027670 (-)
20500047	1.52903	0.31576	A	1.22847	0	A	1.22847	0	A	1.06698	-0.20333	A	1.22847	0	A	1.22847	0	A	1.32866	1.17464	1.13112	0.17775	0.239089	AA	0	miRNA	miRBase	Caenorhabditis elegans	cel-miR-53-3p	IV:11027593-11027614 (-)	22	CACGGCACAAUAUAUGGGUCGC	MIMAT0020312_st	MIMAT0020312	F36H1.8 // sense // exon // 1	cel-mir-51 // IV:11025992-11026091 (-) /// cel-mir-53 // IV:11027572-11027670 (-)
20500048	1.45322	0.09432	A	1.75605	0.3674	A	1.31298	-0.05208	A	1.31298	-0.05208	A	1.00337	-0.44008	A	1.40951	0.05027	A	1.50742	1.24195	1.21375	0.279467	0.216152	AA	0	miRNA	miRBase	Caenorhabditis elegans	cel-miR-54-5p	X:13144985-13145006 (-)	22	AGGAUAUGAGACGACGAGAACA	MIMAT0020773_st	MIMAT0020773	F09A5.3b // antisense // intron // 1 /// F09A5.5 // sense // exon // 1	cel-mir-54 // X:13144926-13145024 (-) /// cel-mir-55 // X:13144757-13144854 (-) /// cel-mir-56 // X:13144621-13144717 (-)
20500049	1.22847	0	A	1.05048	-0.2258	A	1.22847	0	A	1.22847	0	A	1.22847	0	A	1.22847	0	A	1.16914	1.22847	0.951704	-0.0714149	0.373901	AA	0	miRNA	miRBase	Caenorhabditis elegans	cel-miR-54-3p	X:13144941-13144964 (-)	24	UACCCGUAAUCUUCAUAAUCCGAG	MIMAT0000025_st	MIMAT0000025	F09A5.3b // antisense // intron // 1 /// F09A5.5 // sense // exon // 1	cel-mir-54 // X:13144926-13145024 (-) /// cel-mir-55 // X:13144757-13144854 (-) /// cel-mir-56 // X:13144621-13144717 (-)
20500050	1.05048	0	A	1.05048	0	A	1.05048	0	A	1.05048	0	A	1.05048	0	A	1.05048	0	A	1.05048	1.05048	1	0	1	AA	0	miRNA	miRBase	Caenorhabditis elegans	cel-miR-55-5p	X:13144811-13144832 (-)	22	CGGCAGAAACCUAUCGGUUAUA	MIMAT0020313_st	MIMAT0020313	F09A5.3b // antisense // intron // 1 /// F09A5.6 // sense // exon // 1 /// F09A5.8 // sense // exon // 1	cel-mir-54 // X:13144926-13145024 (-) /// cel-mir-55 // X:13144757-13144854 (-) /// cel-mir-56 // X:13144621-13144717 (-)
20500051	1.03822	-0.14725	A	1.08537	-0.08317	A	1.05048	-0.13031	A	1.45596	0.34061	P	1.21419	0.07864	A	1.22847	0.0955	A	1.05802	1.29954	0.814152	-0.29663	0.0282507	PA	0	miRNA	miRBase	Caenorhabditis elegans	cel-miR-55-3p	X:13144772-13144794 (-)	23	UACCCGUAUAAGUUUCUGCUGAG	MIMAT0000026_st	MIMAT0000026	F09A5.3b // antisense // intron // 1 /// F09A5.6 // sense // exon // 1 /// F09A5.8 // sense // exon // 1	cel-mir-54 // X:13144926-13145024 (-) /// cel-mir-55 // X:13144757-13144854 (-) /// cel-mir-56 // X:13144621-13144717 (-)
20500052	1.01412	-0.1465	A	0.98717	-0.18535	A	1.12251	0	A	1.31269	0.2258	A	1.12251	0	A	1.33468	0.24977	A	1.04127	1.25663	0.828621	-0.271217	0.0508945	AA	0	miRNA	miRBase	Caenorhabditis elegans	cel-miR-56-5p	X:13144678-13144700 (-)	23	UGGCGGAUCCAUUUUGGGUUGUA	MIMAT0000027_st	MIMAT0000027	F09A5.3b // antisense // intron // 1 /// F09A5.8 // sense // exon // 1	cel-mir-54 // X:13144926-13145024 (-) /// cel-mir-55 // X:13144757-13144854 (-) /// cel-mir-56 // X:13144621-13144717 (-)
20500053	1.41241	0.17359	A	1.22847	-0.02771	A	1.11074	-0.17306	A	1.22847	-0.02771	A	1.50297	0.26325	A	1.27612	0.02719	A	1.25054	1.33585	0.936136	-0.0952104	0.511949	AA	0	miRNA	miRBase	Caenorhabditis elegans	cel-miR-56-3p	X:13144636-13144657 (-)	22	UACCCGUAAUGUUUCCGCUGAG	MIMAT0000028_st	MIMAT0000028	F09A5.3b // antisense // intron // 1 /// F09A5.8 // sense // exon // 1	cel-mir-54 // X:13144926-13145024 (-) /// cel-mir-55 // X:13144757-13144854 (-) /// cel-mir-56 // X:13144621-13144717 (-)
20500054	1.23443	-0.12826	A	0.87998	-0.61657	A	1.46066	0.11452	A	1.25483	-0.10462	A	1.44357	0.09754	A	1.70958	0.34154	A	1.19169	1.46933	0.811045	-0.302146	0.268862	AA	0	miRNA	miRBase	Caenorhabditis elegans	cel-miR-57-5p	II:7850507-7850530 (-)	24	UACCCUGUAGAUCGAGCUGUGUGU	MIMAT0000029_st	MIMAT0000029	T09A5.13 // sense // exon // 1	---
20500055	1.18156	-0.02836	A	1.54336	0.35702	A	0.94315	-0.35348	A	1.34914	0.16299	A	1.22847	0.02781	A	1.05048	-0.19799	A	1.22269	1.20936	1.01102	0.0158109	0.980913	AA	0	miRNA	miRBase	Caenorhabditis elegans	cel-miR-57-3p	II:7850470-7850491 (-)	22	ACGAGCUAGACUACAAGGUGCA	MIMAT0020314_st	MIMAT0020314	T09A5.13 // sense // exon // 1	---
20500056	1.06698	-0.20333	A	1.22847	0	A	1.13579	-0.11316	A	1.26101	0.03772	A	1.22847	0	A	1.46066	0.24977	A	1.14375	1.31671	0.868638	-0.203174	0.107808	AA	0	miRNA	miRBase	Caenorhabditis elegans	cel-miR-58-5p	IV:3233266-3233286 (+)	21	UGCCCUACUCUUCGCAUCUCA	MIMAT0015100_st	MIMAT0015100	Y67D8A.2a.1 // sense // intron // 8 /// Y67D8A.2a.2 // sense // intron // 8 /// Y67D8A.2a.3 // sense // intron // 8 /// Y67D8A.2b.1 // sense // intron // 8 /// Y67D8A.2b.2 // sense // intron // 8 /// Y67D8A.2b.3 // sense // intron // 8 /// Y67D8A.4 // sense // exon // 1 /// Y67D8A.6 // sense // exon // 1	---
20500057	1.17643	-0.12488	A	1.2828	0	A	1.44961	0.17636	A	1.39879	0.12488	A	1.22847	-0.06244	A	1.2828	0	A	1.30295	1.30335	0.999688	-0.000450214	0.973472	AA	0	miRNA	miRBase	Caenorhabditis elegans	cel-miR-58-3p	IV:3233311-3233332 (+)	22	UGAGAUCGUUCAGUACGGCAAU	MIMAT0000030_st	MIMAT0000030	Y67D8A.2a.1 // sense // intron // 8 /// Y67D8A.2a.2 // sense // intron // 8 /// Y67D8A.2a.3 // sense // intron // 8 /// Y67D8A.2b.1 // sense // intron // 8 /// Y67D8A.2b.2 // sense // intron // 8 /// Y67D8A.2b.3 // sense // intron // 8 /// Y67D8A.4 // sense // exon // 1 /// Y67D8A.6 // sense // exon // 1	---
20500058	1.37463	-0.01685	A	1.04493	-0.41248	A	1.19393	-0.22017	A	1.60753	0.20896	P	1.47203	0.08191	A	1.40692	0.01665	A	1.2045	1.49549	0.805418	-0.312191	0.066506	PA	0	miRNA	miRBase	Caenorhabditis elegans	cel-miR-59-5p	IV:11309191-11309212 (-)	22	UCGUCCUGAAAACGAAACGGAA	MIMAT0015101_st	MIMAT0015101	B0035.17 // sense // exon // 1	---
20500059	1.3196	0.13803	A	1.1992	0	A	1.1992	0	A	1.14709	-0.0641	A	1.0787	-0.15278	A	1.41762	0.24139	A	1.23933	1.21447	1.02047	0.0292374	0.782147	AA	0	miRNA	miRBase	Caenorhabditis elegans	cel-miR-59-3p	IV:11309147-11309169 (-)	23	UCGAAUCGUUUAUCAGGAUGAUG	MIMAT0000031_st	MIMAT0000031	B0035.17 // sense // exon // 1	---
20500060	1.22847	0	A	1.22847	0	A	1.0924	-0.16935	A	1.22847	0	A	1.22847	0	A	1.22847	0	A	1.18311	1.22847	0.963079	-0.0542743	0.373901	AA	0	miRNA	miRBase	Caenorhabditis elegans	cel-miR-60-5p	II:6328725-6328746 (-)	22	AACUGGAAGAGUGCCAUAAAAU	MIMAT0015102_st	MIMAT0015102	C32D5.13 // sense // exon // 1 /// C32D5.15 // antisense // exon // 1	---
20500061	1.65554	0.34398	A	1.3977	0.09973	A	1.157	-0.17293	A	0.9913	-0.39592	A	1.30434	0	A	1.30434	0	A	1.40341	1.19999	1.16952	0.225914	0.327215	AA	0	miRNA	miRBase	Caenorhabditis elegans	cel-miR-60-3p	II:6328685-6328707 (-)	23	UAUUAUGCACAUUUUCUAGUUCA	MIMAT0000032_st	MIMAT0000032	C32D5.13 // sense // exon // 1 /// C32D5.15 // antisense // exon // 1	---
20500062	12.7287	0.62578	P	3.76944	-1.12988	P	17.9257	1.11973	P	1.96931	-2.06654	P	30.641	1.89316	P	2.04514	-2.01203	A	11.4746	11.5518	0.993317	-0.00967422	0.56187	PA	0	miRNA	miRBase	Caenorhabditis elegans	cel-miR-61-5p	V:11770095-11770114 (-)	20	UGGGUUACGGGGCUUAGUCC	MIMAT0015103_st	MIMAT0015103	F55A11.9 // sense // exon // 1	cel-mir-61 // V:11770042-11770138 (-) /// cel-mir-250 // V:11769899-11769997 (-)
20500063	1.22847	0	A	1.22847	0	A	1.07124	-0.19758	A	1.4366	0.2258	A	1.22847	0	A	1.22847	0	A	1.17606	1.29785	0.906163	-0.142158	0.231054	AA	0	miRNA	miRBase	Caenorhabditis elegans	cel-miR-61-3p	V:11770058-11770078 (-)	21	UGACUAGAACCGUUACUCAUC	MIMAT0000033_st	MIMAT0000033	F55A11.9 // sense // exon // 1	cel-mir-61 // V:11770042-11770138 (-) /// cel-mir-250 // V:11769899-11769997 (-)
20500064	1.32209	-0.01298	A	1.30547	-0.03123	A	1.34599	0.01286	A	1.41174	0.08167	A	1.26618	-0.07532	A	1.52933	0.1971	A	1.32452	1.40242	0.944453	-0.082449	0.383168	AA	0	miRNA	miRBase	Caenorhabditis elegans	cel-miR-62	X:12692572-12692593 (+)	22	UGAUAUGUAAUCUAGCUUACAG	MIMAT0000034_st	MIMAT0000034	T07C5.1b // sense // 3UTR // 3 /// T07C5.1c // sense // 3UTR // 3	---
20500065	1.17768	0	A	1.17768	0	A	1.17768	0	A	1.17768	0	A	1.17768	0	A	1.17768	0	A	1.17768	1.17768	1	0	1	AA	0	miRNA	miRBase	Caenorhabditis elegans	cel-miR-63-5p	X:17598755-17598773 (-)	19	UCUAACUCGUCGGUAGUCA	MIMAT0015104_st	MIMAT0015104	C16H3.5 // sense // exon // 1	---
20500066	1.22847	0	A	1.22847	0	A	1.39879	0.18732	A	1.22847	0	A	1.22847	0	A	1.6426	0.41912	A	1.28524	1.36651	0.940527	-0.088458	0.640167	AA	0	miRNA	miRBase	Caenorhabditis elegans	cel-miR-63-3p	X:17598709-17598732 (-)	24	UAUGACACUGAAGCGAGUUGGAAA	MIMAT0000035_st	MIMAT0000035	C16H3.5 // sense // exon // 1	---
20500067	1.22847	0	A	1.22847	0	A	1.21876	-0.01145	A	1.21153	-0.02003	A	1.22847	0	A	1.46066	0.24977	A	1.22523	1.30022	0.942328	-0.0856992	0.407112	AA	0	miRNA	miRBase	Caenorhabditis elegans	cel-miR-64-5p	III:2172859-2172881 (+)	23	UAUGACACUGAAGCGUUACCGAA	MIMAT0000036_st	MIMAT0000036	Y48G9A.13 // sense // exon // 1 /// Y48G9A.3 // sense // intron // 11	cel-mir-64 // III:2172838-2172947 (+) /// cel-mir-65 // III:2172992-2173091 (+) /// cel-mir-66 // III:2173098-2173196 (+) /// cel-mir-229 // III:2172442-2172556 (+)
20500068	1.05048	-0.11732	A	1.05048	-0.11732	A	1.22847	0.10849	A	1.82129	0.67659	P	1.05048	-0.11732	A	1.22847	0.10849	A	1.10981	1.36675	0.812009	-0.300433	0.34585	PA	0	miRNA	miRBase	Caenorhabditis elegans	cel-miR-64-3p	III:2172905-2172925 (+)	21	GUGCAACGAUCAGUGGCAUGC	MIMAT0015105_st	MIMAT0015105	Y48G9A.13 // sense // exon // 1 /// Y48G9A.3 // sense // intron // 11	cel-mir-64 // III:2172838-2172947 (+) /// cel-mir-65 // III:2172992-2173091 (+) /// cel-mir-66 // III:2173098-2173196 (+) /// cel-mir-229 // III:2172442-2172556 (+)
20500069	1.40567	0.3073	P	1.136	0	A	0.97141	-0.2258	A	1.136	0	A	1.12718	-0.01124	A	1.2935	0.18732	A	1.17103	1.18556	0.987741	-0.0177947	0.859755	PA	0	miRNA	miRBase	Caenorhabditis elegans	cel-miR-65-5p	III:2173009-2173031 (+)	23	UAUGACACUGAAGCGUAACCGAA	MIMAT0000037_st	MIMAT0000037	Y48G9A.14 // sense // exon // 1 /// Y48G9A.3 // sense // intron // 11	cel-mir-64 // III:2172838-2172947 (+) /// cel-mir-65 // III:2172992-2173091 (+) /// cel-mir-66 // III:2173098-2173196 (+) /// cel-mir-229 // III:2172442-2172556 (+)
20500070	1.136	0	A	1.32847	0.2258	A	1.136	0	A	1.01017	-0.16935	A	1.136	0	A	1.136	0	A	1.20016	1.09406	1.09698	0.133535	0.234101	AA	0	miRNA	miRBase	Caenorhabditis elegans	cel-miR-65-3p	III:2173049-2173069 (+)	21	CUGCUACGCGCAGUGCCAUGC	MIMAT0015106_st	MIMAT0015106	Y48G9A.14 // sense // exon // 1 /// Y48G9A.3 // sense // intron // 11	cel-mir-64 // III:2172838-2172947 (+) /// cel-mir-65 // III:2172992-2173091 (+) /// cel-mir-66 // III:2173098-2173196 (+) /// cel-mir-229 // III:2172442-2172556 (+)
20500071	0.99066	-0.14518	A	1.48402	0.43788	A	1.15246	0.07308	A	1.14059	0.05814	A	1.01657	-0.10793	A	1.05048	-0.06058	A	1.20905	1.06921	1.13078	0.17732	0.420827	AA	0	miRNA	miRBase	Caenorhabditis elegans	cel-miR-66-5p	III:2173114-2173136 (+)	23	CAUGACACUGAUUAGGGAUGUGA	MIMAT0000038_st	MIMAT0000038	Y48G9A.14 // sense // exon // 1 /// Y48G9A.15 // sense // exon // 1 /// Y48G9A.3 // sense // intron // 11	cel-mir-64 // III:2172838-2172947 (+) /// cel-mir-65 // III:2172992-2173091 (+) /// cel-mir-66 // III:2173098-2173196 (+) /// cel-mir-229 // III:2172442-2172556 (+)
20500072	1.33997	0.07135	A	1.46252	0.1976	A	1.03526	-0.30086	A	1.21067	-0.07506	A	1.05332	-0.27591	A	1.64329	0.36573	A	1.27925	1.30243	0.982205	-0.0259039	0.951713	AA	0	miRNA	miRBase	Caenorhabditis elegans	cel-miR-66-3p	III:2173157-2173177 (+)	21	AAAUUCCUAACGGUGUCAAAC	MIMAT0020315_st	MIMAT0020315	Y48G9A.14 // sense // exon // 1 /// Y48G9A.15 // sense // exon // 1 /// Y48G9A.3 // sense // intron // 11	cel-mir-64 // III:2172838-2172947 (+) /// cel-mir-65 // III:2172992-2173091 (+) /// cel-mir-66 // III:2173098-2173196 (+) /// cel-mir-229 // III:2172442-2172556 (+)
20500073	1.05048	0	A	1.42708	0.44201	A	1.05048	0	A	1.05048	0	A	0.99434	-0.07924	A	1.11565	0.08683	A	1.17601	1.05349	1.1163	0.158728	0.402926	AA	0	miRNA	miRBase	Caenorhabditis elegans	cel-miR-67-5p	III:5931361-5931383 (-)	23	CGCUCAUUCUGCCGGUUGUUAUG	MIMAT0020316_st	MIMAT0020316	EGAP1.2 // sense // exon // 1 /// EGAP1.3 // sense // intron // 3	---
20500074	1.08992	-0.24689	A	1.31666	0.02577	A	1.39842	0.11267	A	1.22423	-0.07924	A	1.43165	0.14656	A	1.27005	-0.02623	A	1.26833	1.30864	0.969197	-0.045138	0.716777	AA	0	miRNA	miRBase	Caenorhabditis elegans	cel-miR-67-3p	III:5931319-5931342 (-)	24	UCACAACCUCCUAGAAAGAGUAGA	MIMAT0000039_st	MIMAT0000039	EGAP1.2 // sense // exon // 1 /// EGAP1.3 // sense // intron // 3	---
20500075	1.35967	0.1464	A	1.22847	0	A	1.22847	0	A	1.22847	0	A	0.97362	-0.33542	A	1.22847	0	A	1.2722	1.14352	1.11253	0.153848	0.258362	AA	0	miRNA	miRBase	Caenorhabditis elegans	cel-miR-70-5p	V:6665572-6665594 (-)	23	CGAAAUACUAUCGACGAAUAACA	MIMAT0020317_st	MIMAT0020317	T10H9.5a.1 // sense // intron // 1 /// T10H9.5a.2 // sense // intron // 1 /// T10H9.5b.1 // sense // intron // 1 /// T10H9.5b.2 // sense // intron // 1 /// T10H9.5c.1 // sense // intron // 1 /// T10H9.5c.2 // sense // intron // 1 /// T10H9.7 // sense // exon // 1	---
20500076	1.18938	0	A	0.96056	-0.30827	A	0.97909	-0.28071	A	1.26003	0.08324	A	1.18938	0	A	1.29331	0.12086	A	1.04301	1.24757	0.836031	-0.258372	0.0651126	AA	0	miRNA	miRBase	Caenorhabditis elegans	cel-miR-70-3p	V:6665535-6665557 (-)	23	UAAUACGUCGUUGGUGUUUCCAU	MIMAT0000042_st	MIMAT0000042	T10H9.5a.1 // sense // intron // 1 /// T10H9.5a.2 // sense // intron // 1 /// T10H9.5b.1 // sense // intron // 1 /// T10H9.5b.2 // sense // intron // 1 /// T10H9.5c.1 // sense // intron // 1 /// T10H9.5c.2 // sense // intron // 1 /// T10H9.7 // sense // exon // 1	---
20500077	1.0587	0	A	1.0587	0	A	1.0587	0	A	1.0587	0	A	1.24908	0.23858	A	1.0587	0	A	1.0587	1.12216	0.943448	-0.0839846	0.373901	AA	0	miRNA	miRBase	Caenorhabditis elegans	cel-miR-71-5p	I:9379975-9379997 (-)	23	UGAAAGACAUGGGUAGUGAGACG	MIMAT0000043_st	MIMAT0000043	F16A11.3a.1 // sense // intron // 5 /// F16A11.3a.2 // sense // intron // 5 /// F16A11.3b.1 // sense // intron // 5 /// F16A11.3b.2 // sense // intron // 5 /// F16A11.3c.1 // sense // intron // 5 /// F16A11.3c.2 // sense // intron // 5 /// F16A11.3d // sense // intron // 8 /// F16A11.4 // sense // exon // 1 /// F16A11.6 // antisense // exon // 1	cel-mir-2 // I:9372760-9372857 (-) /// cel-mir-71 // I:9379919-9380012 (-)
20500078	1.05253	0.0014	A	1.03214	-0.02682	A	1.03214	-0.02682	A	1.25274	0.25262	A	1.05048	-0.00141	A	1.3924	0.40512	A	1.03894	1.23187	0.843379	-0.245746	0.118015	AA	0	miRNA	miRBase	Caenorhabditis elegans	cel-miR-71-3p	I:9379940-9379960 (-)	21	UAUCACUAUUCUGUUUUUCGC	MIMAT0015107_st	MIMAT0015107	F16A11.3a.1 // sense // intron // 5 /// F16A11.3a.2 // sense // intron // 5 /// F16A11.3b.1 // sense // intron // 5 /// F16A11.3b.2 // sense // intron // 5 /// F16A11.3c.1 // sense // intron // 5 /// F16A11.3c.2 // sense // intron // 5 /// F16A11.3d // sense // intron // 8 /// F16A11.4 // sense // exon // 1 /// F16A11.6 // antisense // exon // 1	cel-mir-2 // I:9372760-9372857 (-) /// cel-mir-71 // I:9379919-9380012 (-)
20500079	1.36991	0.00761	A	1.17731	-0.21098	A	1.46066	0.10016	A	1.0604	-0.36185	A	1.49895	0.13749	A	1.35549	-0.00765	A	1.33596	1.30495	1.02377	0.033886	0.817898	AA	0	miRNA	miRBase	Caenorhabditis elegans	cel-miR-72-5p	II:2452859-2452881 (+)	23	AGGCAAGAUGUUGGCAUAGCUGA	MIMAT0000044_st	MIMAT0000044	F53G2.9 // sense // exon // 1	---
20500080	1.83928	0.3692	A	1.22847	-0.21308	A	1.24596	-0.19268	A	1.44858	0.0247	A	1.3994	-0.02513	A	1.48146	0.05708	A	1.4379	1.44315	0.996367	-0.00525124	0.879456	AA	0	miRNA	miRBase	Caenorhabditis elegans	cel-miR-72-3p	II:2452903-2452924 (+)	22	AGCUUCGCCACAUUCUGCCACG	MIMAT0020318_st	MIMAT0020318	F53G2.9 // sense // exon // 1	---
20500081	1.08816	-0.1129	A	1.17673	0	A	1.17673	0	A	1.09667	-0.10166	A	1.53724	0.38556	A	1.26265	0.10166	A	1.14721	1.29885	0.883246	-0.179113	0.319264	AA	0	miRNA	miRBase	Caenorhabditis elegans	cel-miR-73-5p	X:2368779-2368802 (+)	24	UGGACUUCCAUAUCGAGCCACAGC	MIMAT0020319_st	MIMAT0020319	T24D8.9 // sense // exon // 1	cel-mir-73 // X:2368757-2368855 (+) /// cel-mir-74 // X:2369035-2369131 (+) /// cel-mir-75 // X:2372446-2372542 (+)
20500082	1.12885	-0.02382	A	1.56561	0.44806	A	1.06864	-0.10289	A	1.10824	-0.05041	A	1.16644	0.02344	A	1.16644	0.02344	A	1.25437	1.14704	1.09357	0.129043	0.566881	AA	0	miRNA	miRBase	Caenorhabditis elegans	cel-miR-73-3p	X:2368818-2368840 (+)	23	UGGCAAGAUGUAGGCAGUUCAGU	MIMAT0000045_st	MIMAT0000045	T24D8.9 // sense // exon // 1	cel-mir-73 // X:2368757-2368855 (+) /// cel-mir-74 // X:2369035-2369131 (+) /// cel-mir-75 // X:2372446-2372542 (+)
20500083	1.05048	-0.10355	A	1.22847	0.12225	A	1.20683	0.09662	A	1.05048	-0.10355	A	1.05048	-0.10355	A	2.0277	0.84524	P	1.16193	1.37622	0.844288	-0.244192	0.61942	PA	0	miRNA	miRBase	Caenorhabditis elegans	cel-miR-74-5p	X:2369054-2369076 (+)	23	CGGGCUUCCAUCUCUUUCCCAGC	MIMAT0020320_st	MIMAT0020320	T24D8.14 // sense // exon // 1 /// T24D8.16 // antisense // exon // 1 /// T24D8.7 // sense // exon // 1	cel-mir-73 // X:2368757-2368855 (+) /// cel-mir-74 // X:2369035-2369131 (+) /// cel-mir-75 // X:2372446-2372542 (+)
20500084	1.02604	-0.20333	A	1.18133	0	A	1.22847	0.05645	A	1.18133	0	A	1.18133	0	A	1.23807	0.06769	A	1.14528	1.20024	0.954207	-0.0676266	0.432571	AA	0	miRNA	miRBase	Caenorhabditis elegans	cel-miR-74-3p	X:2369095-2369116 (+)	22	UGGCAAGAAAUGGCAGUCUACA	MIMAT0000046_st	MIMAT0000046	T24D8.14 // sense // exon // 1 /// T24D8.16 // antisense // exon // 1 /// T24D8.7 // sense // exon // 1	cel-mir-73 // X:2368757-2368855 (+) /// cel-mir-74 // X:2369035-2369131 (+) /// cel-mir-75 // X:2372446-2372542 (+)
20500085	1.32837	0.10849	A	1.05048	-0.23011	A	1.34647	0.12801	A	1.13591	-0.11732	A	1.368	0.15091	A	0.98659	-0.32064	A	1.24177	1.1635	1.06727	0.0939306	0.61446	AA	0	miRNA	miRBase	Caenorhabditis elegans	cel-miR-75-5p	X:2372468-2372489 (+)	22	CAGUCGGUUGCAAGCUUAAAUA	MIMAT0015108_st	MIMAT0015108	T24D8.8 // sense // exon // 1	cel-mir-73 // X:2368757-2368855 (+) /// cel-mir-74 // X:2369035-2369131 (+) /// cel-mir-75 // X:2372446-2372542 (+)
20500086	1.33564	0.08876	A	1.22847	-0.03191	A	1.15687	-0.11854	A	1.19262	-0.07463	A	1.74015	0.47045	A	1.28342	0.03122	A	1.24033	1.4054	0.882546	-0.180257	0.410336	AA	0	miRNA	miRBase	Caenorhabditis elegans	cel-miR-75-3p	X:2372506-2372527 (+)	22	UUAAAGCUACCAACCGGCUUCA	MIMAT0000047_st	MIMAT0000047	T24D8.8 // sense // exon // 1	cel-mir-73 // X:2368757-2368855 (+) /// cel-mir-74 // X:2369035-2369131 (+) /// cel-mir-75 // X:2372446-2372542 (+)
20500087	1.22847	0.02795	A	1.18133	-0.0285	A	1.22847	0.02795	A	1.05048	-0.19785	A	1.01017	-0.2543	A	1.22847	0.02795	A	1.21276	1.09637	1.10615	0.145551	0.163279	AA	0	miRNA	miRBase	Caenorhabditis elegans	cel-miR-76-5p	III:3142052-3142073 (+)	22	UGGGCUUCACAAUAGUCGAAUA	MIMAT0020321_st	MIMAT0020321	C44B11.5 // sense // exon // 1	---
20500088	1.2033	0.08244	A	1.16916	0.04092	A	1.04512	-0.12089	A	1.36725	0.26672	A	1.07246	-0.08363	A	1.10377	-0.04211	A	1.13919	1.18116	0.96447	-0.0521918	0.734078	AA	0	miRNA	miRBase	Caenorhabditis elegans	cel-miR-76-3p	III:3142097-3142118 (+)	22	UUCGUUGUUGAUGAAGCCUUGA	MIMAT0000048_st	MIMAT0000048	C44B11.5 // sense // exon // 1	---
20500089	1.136	0	A	1.27749	0.16935	A	1.2935	0.18732	A	1.136	0	A	1.136	0	A	1.136	0	A	1.23566	1.136	1.08773	0.121323	0.117125	AA	0	miRNA	miRBase	Caenorhabditis elegans	cel-miR-77-5p	II:12519227-12519248 (+)	22	GAUGGUUGUGCUCUGAGGAAAU	MIMAT0020774_st	MIMAT0020774	T21B4.13 // sense // exon // 1 /// T21B4.20 // sense // exon // 1	---
20500090	0.96338	-0.40911	A	1.21893	-0.06967	A	1.42482	0.15549	A	1.33954	0.06646	A	1.21839	-0.07031	A	1.44933	0.1801	A	1.20238	1.33575	0.900149	-0.151765	0.405757	AA	0	miRNA	miRBase	Caenorhabditis elegans	cel-miR-77-3p	II:12519265-12519286 (+)	22	UUCAUCAGGCCAUAGCUGUCCA	MIMAT0000049_st	MIMAT0000049	T21B4.13 // sense // exon // 1 /// T21B4.20 // sense // exon // 1	---
20500091	1.05048	0	A	1.05048	0	A	0.93247	-0.17192	A	1.24904	0.24977	A	1.05048	0	A	1.24386	0.24378	A	1.01114	1.18113	0.856084	-0.224176	0.0913894	AA	0	miRNA	miRBase	Caenorhabditis elegans	cel-miR-78	IV:15165675-15165695 (+)	21	UGGAGGCCUGGUUGUUUGUGC	MIMAT0000050_st	MIMAT0000050	Y40H7A.12 // sense // exon // 1 /// Y40H7A.157 // sense // exon // 1 /// Y40H7A.194 // sense // exon // 1	---
20500092	1.05048	0	A	1.05048	0	A	1.05048	0	A	1.05048	0	A	1.05048	0	A	1.05048	0	A	1.05048	1.05048	1	0	1	AA	0	miRNA	miRBase	Caenorhabditis elegans	cel-miR-79-5p	I:9332956-9332978 (+)	23	CUUUGGUGAUUCAGCUUCAAUGA	MIMAT0020322_st	MIMAT0020322	C12C8.4 // sense // exon // 1	---
20500093	1.18133	-0.0285	A	1.22847	0.02795	A	1.18133	-0.0285	A	1.46066	0.27772	A	1.33897	0.15222	A	1.02161	-0.23806	A	1.19704	1.27375	0.939781	-0.089603	0.662332	AA	0	miRNA	miRBase	Caenorhabditis elegans	cel-miR-79-3p	I:9332998-9333019 (+)	22	AUAAAGCUAGGUUACCAAAGCU	MIMAT0000051_st	MIMAT0000051	C12C8.4 // sense // exon // 1	---
20500094	1.35967	0.24181	A	1.05048	-0.13039	A	1.22847	0.09541	A	1.07124	-0.10217	A	1.28086	0.15566	A	1.05048	-0.13039	A	1.21287	1.13419	1.06937	0.0967623	0.540296	AA	0	miRNA	miRBase	Caenorhabditis elegans	cel-miR-80-5p	III:8865247-8865268 (-)	22	AGCUUUCGACAUGAUUCUGAAC	MIMAT0000052_st	MIMAT0000052	K01F9.3 // sense // exon // 1 /// K01F9.6 // antisense // exon // 1	cel-mir-80 // III:8865189-8865286 (-) /// cel-mir-90 // III:8873906-8874003 (-) /// cel-mir-238 // III:8867247-8867344 (-)
20500095	1.136	0	A	1.136	0	A	1.136	0	A	1.136	0	A	1.136	0	A	0.98666	-0.20333	A	1.136	1.08622	1.04583	0.0646465	0.373901	AA	0	miRNA	miRBase	Caenorhabditis elegans	cel-miR-80-3p	III:8865204-8865226 (-)	23	UGAGAUCAUUAGUUGAAAGCCGA	MIMAT0000053_st	MIMAT0000053	K01F9.3 // sense // exon // 1 /// K01F9.6 // antisense // exon // 1	cel-mir-80 // III:8865189-8865286 (-) /// cel-mir-90 // III:8873906-8874003 (-) /// cel-mir-238 // III:8867247-8867344 (-)
20500096	1.0924	-0.00286	A	1.09675	0.00286	A	1.16609	0.09131	A	0.9488	-0.20619	A	1.09675	0.00286	A	1.02688	-0.0921	A	1.11841	1.02414	1.09205	0.127036	0.129547	AA	0	miRNA	miRBase	Caenorhabditis elegans	cel-miR-81-5p	X:2431089-2431110 (+)	22	CGGUUUUCACCGUGAUCUGAGA	MIMAT0015109_st	MIMAT0015109	T07D1.2.1 // antisense // intron // 6 /// T07D1.2.2 // antisense // intron // 5 /// T07D1.2.3 // antisense // intron // 6 /// T07D1.6 // sense // exon // 1	cel-mir-81 // X:2431065-2431172 (+) /// cel-mir-82 // X:2435251-2435347 (-)
20500097	1.25131	0.01323	A	1.22847	-0.01335	A	1.32976	0.10096	A	1.04787	-0.24274	A	1.48402	0.2593	A	1.15496	-0.10237	A	1.26985	1.22895	1.03328	0.0472281	0.705967	AA	0	miRNA	miRBase	Caenorhabditis elegans	cel-miR-81-3p	X:2431131-2431152 (+)	22	UGAGAUCAUCGUGAAAGCUAGU	MIMAT0000054_st	MIMAT0000054	T07D1.2.1 // antisense // intron // 6 /// T07D1.2.2 // antisense // intron // 5 /// T07D1.2.3 // antisense // intron // 6 /// T07D1.6 // sense // exon // 1	cel-mir-81 // X:2431065-2431172 (+) /// cel-mir-82 // X:2435251-2435347 (-)
20500098	1.05048	0	A	0.97901	-0.10166	A	1.05048	0	A	1.12718	0.10166	A	1.05048	0	A	1.05048	0	A	1.02666	1.07605	0.954101	-0.0677868	0.2302	AA	0	miRNA	miRBase	Caenorhabditis elegans	cel-miR-82-5p	X:2435304-2435326 (-)	23	CGGUUUUCUCUGUGAUCUACAGA	MIMAT0020323_st	MIMAT0020323	T07D1.2.1 // sense // intron // 2 /// T07D1.2.2 // sense // intron // 1 /// T07D1.2.3 // sense // intron // 2 /// T07D1.7 // sense // exon // 1	cel-mir-81 // X:2431065-2431172 (+) /// cel-mir-82 // X:2435251-2435347 (-)
20500099	1.18069	-0.07154	A	0.92038	-0.43087	A	1.30074	0.06816	A	1.32143	0.09093	A	1.00711	-0.30094	A	1.5712	0.3407	A	1.13394	1.29991	0.872317	-0.197075	0.474242	AA	0	miRNA	miRBase	Caenorhabditis elegans	cel-miR-82-3p	X:2435266-2435287 (-)	22	UGAGAUCAUCGUGAAAGCCAGU	MIMAT0000055_st	MIMAT0000055	T07D1.2.1 // sense // intron // 2 /// T07D1.2.2 // sense // intron // 1 /// T07D1.2.3 // sense // intron // 2 /// T07D1.7 // sense // exon // 1	cel-mir-81 // X:2431065-2431172 (+) /// cel-mir-82 // X:2435251-2435347 (-)
20500100	1.05048	0	A	1.05048	0	A	1.1676	0.15249	A	1.20169	0.19401	A	1.05048	0	A	1.05048	0	A	1.08952	1.10088	0.989678	-0.0149689	0.874556	AA	0	miRNA	miRBase	Caenorhabditis elegans	cel-miR-83-5p	IV:7841635-7841657 (+)	23	ACUGAAUUUAUGUGUGUACUUGA	MIMAT0020775_st	MIMAT0020775	C06A6.6 // sense // exon // 1 /// C06A6.9 // sense // exon // 1	---
20500101	1.19656	-0.01911	A	1.22847	0.01886	A	1.0232	-0.24491	A	1.37681	0.18333	A	1.07708	-0.17087	A	1.2611	0.05668	A	1.14941	1.23833	0.928194	-0.107502	0.472885	AA	0	miRNA	miRBase	Caenorhabditis elegans	cel-miR-83-3p	IV:7841679-7841700 (+)	22	UAGCACCAUAUAAAUUCAGUAA	MIMAT0000056_st	MIMAT0000056	C06A6.6 // sense // exon // 1 /// C06A6.9 // sense // exon // 1	---
20500102	0.98919	0.01696	A	0.94144	-0.05442	A	0.99173	0.02066	A	1.10377	0.17508	A	0.96607	-0.01717	A	0.94385	-0.05073	A	0.97412	1.00456	0.969695	-0.0443971	0.608479	AA	0	miRNA	miRBase	Caenorhabditis elegans	cel-miR-84-5p	X:16022376-16022399 (-)	24	UGAGGUAGUAUGUAAUAUUGUAGA	MIMAT0000057_st	MIMAT0000057	B0395.4 // sense // exon // 1	---
20500103	1.08267	-0.12054	A	1.25185	0.08893	A	1.17235	-0.00573	A	1.17235	-0.00573	A	1.18169	0.00571	A	1.42728	0.27813	A	1.16896	1.26044	0.92742	-0.108706	0.396316	AA	0	miRNA	miRBase	Caenorhabditis elegans	cel-miR-84-3p	X:16022339-16022361 (-)	23	CACAAUGUUUCAACUAACUCGGC	MIMAT0015110_st	MIMAT0015110	B0395.4 // sense // exon // 1	---
20500104	1.136	0	A	1.136	0	A	1.136	0	A	1.136	0	A	1.19416	0.07204	A	1.27749	0.16935	A	1.136	1.20255	0.944659	-0.082134	0.176383	AA	0	miRNA	miRBase	Caenorhabditis elegans	cel-miR-85-5p	II:8393524-8393546 (+)	23	CCGAUUUUUCAAUAGUUUGAAAC	MIMAT0020324_st	MIMAT0020324	F49E12.11 // sense // exon // 1 /// F49E12.14 // antisense // exon // 1 /// F49E12.8 // antisense // intron // 2	---
20500105	1.1978	-0.01267	A	1.18193	-0.03191	A	1.21893	0.01256	A	1.39371	0.20587	A	1.21893	0.01256	A	1.0587	-0.19077	A	1.19955	1.22378	0.980203	-0.0288469	0.871305	AA	0	miRNA	miRBase	Caenorhabditis elegans	cel-miR-85-3p	II:8393566-8393589 (+)	24	UACAAAGUAUUUGAAAAGUCGUGC	MIMAT0000058_st	MIMAT0000058	F49E12.11 // sense // exon // 1 /// F49E12.14 // antisense // exon // 1 /// F49E12.8 // antisense // intron // 2	---
20500106	1.2251	0	A	1.20938	-0.01863	A	1.45666	0.24977	A	1.2251	0	A	1.24102	0.01863	A	1.09646	-0.16004	A	1.29705	1.18753	1.09223	0.12727	0.296217	AA	0	miRNA	miRBase	Caenorhabditis elegans	cel-miR-86-5p	III:11936597-11936619 (-)	23	UAAGUGAAUGCUUUGCCACAGUC	MIMAT0000059_st	MIMAT0000059	Y56A3A.7a // sense // intron // 9 /// Y56A3A.7b // sense // intron // 11	---
20500107	1.12075	0.01401	A	1.26543	0.18918	A	1.2852	0.21154	A	1.04014	-0.09367	A	1.00541	-0.14266	A	1.09908	-0.01415	A	1.22379	1.04821	1.16751	0.223432	0.0382076	AA	0	miRNA	miRBase	Caenorhabditis elegans	cel-miR-86-3p	III:11936554-11936575 (-)	22	CUGGGCUCAGAUUCGCUUAGGC	MIMAT0020776_st	MIMAT0020776	Y56A3A.7a // sense // intron // 9 /// Y56A3A.7b // sense // intron // 11	---
20500108	0.91239	-0.20333	A	1.05048	0	A	1.05048	0	A	1.46066	0.47557	A	0.93626	-0.16607	A	1.05048	0	A	1.00445	1.14913	0.874094	-0.19414	0.448943	AA	0	miRNA	miRBase	Caenorhabditis elegans	cel-miR-87-5p	V:12038723-12038746 (-)	24	CGCCUGAUACUUUCGUCUCAACCU	MIMAT0020325_st	MIMAT0020325	F10C2.11 // antisense // exon // 1 /// F10C2.2 // sense // intron // 1 /// F10C2.8 // sense // exon // 1	---
20500109	1.22847	0	A	1.22847	0	A	1.51327	0.30081	A	1.13844	-0.1098	A	1.22847	0	A	1.22847	0	A	1.3234	1.19846	1.10425	0.143071	0.269019	AA	0	miRNA	miRBase	Caenorhabditis elegans	cel-miR-87-3p	V:12038681-12038702 (-)	22	GUGAGCAAAGUUUCAGGUGUGC	MIMAT0000060_st	MIMAT0000060	F10C2.11 // antisense // exon // 1 /// F10C2.2 // sense // intron // 1 /// F10C2.8 // sense // exon // 1	---
20500110	1.05458	-0.07647	A	1.13158	0.02519	A	1.05458	-0.07647	A	1.39879	0.33104	A	1.22847	0.14371	A	1.0924	-0.02564	A	1.08025	1.23989	0.871246	-0.198847	0.150869	AA	0	miRNA	miRBase	Caenorhabditis elegans	cel-miR-90-5p	III:8873966-8873988 (-)	23	CGGCUUUCAACGACGAUAUCAAC	MIMAT0020326_st	MIMAT0020326	K01F9.1 // sense // exon // 1 /// K01F9.2 // sense // intron // 4 /// K01F9.7 // antisense // exon // 1	cel-mir-80 // III:8865189-8865286 (-) /// cel-mir-90 // III:8873906-8874003 (-) /// cel-mir-238 // III:8867247-8867344 (-)
20500111	1.52723	-0.20333	A	2.05296	0.22347	P	1.64889	-0.09275	P	1.75838	0	A	1.75838	0	P	2.05629	0.2258	P	1.74303	1.85768	0.93828	-0.09191	0.539357	PA	0	miRNA	miRBase	Caenorhabditis elegans	cel-miR-90-3p	III:8873920-8873942 (-)	23	UGAUAUGUUGUUUGAAUGCCCCU	MIMAT0000061_st	MIMAT0000061	K01F9.1 // sense // exon // 1 /// K01F9.2 // sense // intron // 4 /// K01F9.7 // antisense // exon // 1	cel-mir-80 // III:8865189-8865286 (-) /// cel-mir-90 // III:8873906-8874003 (-) /// cel-mir-238 // III:8867247-8867344 (-)
20500112	1.75612	-0.21306	P	3.40182	0.74085	P	1.67699	-0.27958	P	2.31509	0.18561	P	2.31509	0.18561	P	1.58666	-0.35947	P	2.27831	2.07228	1.09942	0.136745	0.844362	PP	0	miRNA	miRBase	Homo sapiens	hsa-let-7a-5p	chr11:122017276-122017297 (-) /// chr22:46508632-46508653 (+) /// chr9:96938244-96938265 (+)	22	UGAGGUAGUAGGUUGUAUAGUU	MIMAT0000062_st	MIMAT0000062	ENST00000362295 // sense // exon // 1 /// ENST00000602703 // sense // intron // 1 /// OTTHUMT00000467752 // sense // intron // 1 /// ENST00000362105 // sense // exon // 1 /// ENST00000360737 // sense // exon // 5 /// OTTHUMT00000316781 // sense // exon // 5	hsa-let-7a-1 // chr9:96938239-96938318 (+) /// hsa-let-7d // chr9:96941116-96941202 (+) /// hsa-let-7f-1 // chr9:96938629-96938715 (+) /// hsa-let-7a-2 // chr11:122017230-122017301 (-) /// hsa-mir-100 // chr11:122022937-122023016 (-) /// hsa-let-7a-3 // chr22:46508629-46508702 (+) /// hsa-let-7b // chr22:46509566-46509648 (+) /// hsa-mir-4763 // chr22:46509446-46509537 (+)
20500113	1.3325	0.07135	A	1.06929	-0.24614	A	1.20392	-0.07506	A	1.06929	-0.24614	A	1.45437	0.1976	A	1.5377	0.27798	A	1.2019	1.35379	0.887809	-0.17168	0.441101	AA	0	miRNA	miRBase	Homo sapiens	hsa-let-7a-3p	chr22:46508680-46508700 (+) /// chr9:96938295-96938315 (+)	21	CUAUACAAUCUACUGUCUUUC	MIMAT0004481_st	MIMAT0004481	ENST00000362295 // sense // exon // 1 /// ENST00000602703 // sense // intron // 1 /// OTTHUMT00000467752 // sense // intron // 1 /// ENST00000360737 // sense // exon // 5 /// OTTHUMT00000316781 // sense // exon // 5	hsa-let-7a-1 // chr9:96938239-96938318 (+) /// hsa-let-7d // chr9:96941116-96941202 (+) /// hsa-let-7f-1 // chr9:96938629-96938715 (+) /// hsa-let-7a-3 // chr22:46508629-46508702 (+) /// hsa-let-7b // chr22:46509566-46509648 (+) /// hsa-mir-4763 // chr22:46509446-46509537 (+)
20500114	1.4389	0.19712	A	1.26012	0.00571	A	1.24028	-0.01718	A	1.05048	-0.2568	A	1.31418	0.06631	A	1.25016	-0.00573	A	1.3131	1.20494	1.08976	0.124015	0.345697	AA	0	miRNA	miRBase	Homo sapiens	hsa-let-7a-2-3p	chr11:122017231-122017252 (-)	22	CUGUACAGCCUCCUAGCUUUCC	MIMAT0010195_st	MIMAT0010195	ENST00000362105 // sense // exon // 1	hsa-let-7a-2 // chr11:122017230-122017301 (-) /// hsa-mir-100 // chr11:122022937-122023016 (-)
20500115	25.1183	-2.10009	P	324.209	1.59002	P	16.7524	-2.68446	P	185.855	0.78728	P	113.454	0.0752	P	101.929	-0.07933	P	122.027	133.746	0.912377	-0.132298	0.38621	PP	0	miRNA	miRBase	Homo sapiens	hsa-let-7b-5p	chr22:46509571-46509592 (+)	22	UGAGGUAGUAGGUUGUGUGGUU	MIMAT0000063_st	MIMAT0000063	ENST00000360737 // sense // exon // 5 /// OTTHUMT00000316781 // sense // exon // 5	hsa-let-7a-3 // chr22:46508629-46508702 (+) /// hsa-let-7b // chr22:46509566-46509648 (+) /// hsa-mir-4763 // chr22:46509446-46509537 (+)
20500116	1.34097	0.08082	A	1.19485	-0.08562	A	1.19485	-0.08562	A	1.19485	-0.08562	A	1.36978	0.11149	A	1.82683	0.52689	P	1.24356	1.46382	0.849528	-0.235266	0.31969	PA	0	miRNA	miRBase	Homo sapiens	hsa-let-7b-3p	chr22:46509625-46509646 (+)	22	CUAUACAACCUACUGCCUUCCC	MIMAT0004482_st	MIMAT0004482	ENST00000360737 // sense // exon // 5 /// OTTHUMT00000316781 // sense // exon // 5	hsa-let-7a-3 // chr22:46508629-46508702 (+) /// hsa-let-7b // chr22:46509566-46509648 (+) /// hsa-mir-4763 // chr22:46509446-46509537 (+)
20500117	15.4655	-2.17046	P	169.554	1.28415	P	7.30235	-3.25309	P	172.614	1.30995	P	81.4376	0.22618	P	57.8041	-0.26835	P	64.1072	103.952	0.616701	-0.697357	0.280421	PP	0	miRNA	miRBase	Homo sapiens	hsa-let-7c-5p	chr21:17912158-17912179 (+)	22	UGAGGUAGUAGGUUGUAUGGUU	MIMAT0000064_st	MIMAT0000064	ENST00000362160 // sense // exon // 1 /// ENST00000400178 // sense // intron // 5 /// ENST00000418813 // sense // intron // 3 /// ENST00000428669 // sense // intron // 5 /// ENST00000441820 // sense // intron // 1 /// ENST00000445461 // sense // intron // 5 /// ENST00000453910 // sense // intron // 3 /// ENST00000456342 // sense // intron // 6 /// ENST00000458468 // sense // intron // 6 /// ENST0…	hsa-let-7c // chr21:17912148-17912231 (+) /// hsa-mir-99a // chr21:17911409-17911489 (+)
20500118	1.25815	-0.10049	A	1.36097	0.01284	A	1.33954	-0.01005	A	1.33954	-0.01005	A	1.35827	0.00998	A	1.64382	0.28526	A	1.31955	1.44721	0.911791	-0.133225	0.276445	AA	0	miRNA	miRBase	Homo sapiens	hsa-let-7c-3p	chr21:17912203-17912224 (+)	22	CUGUACAACCUUCUAGCUUUCC	MIMAT0026472_st	MIMAT0026472	ENST00000362160 // sense // exon // 1 /// ENST00000400178 // sense // intron // 5 /// ENST00000418813 // sense // intron // 3 /// ENST00000428669 // sense // intron // 5 /// ENST00000441820 // sense // intron // 1 /// ENST00000445461 // sense // intron // 5 /// ENST00000453910 // sense // intron // 3 /// ENST00000456342 // sense // intron // 6 /// ENST00000458468 // sense // intron // 6 /// ENST0…	hsa-let-7c // chr21:17912148-17912231 (+) /// hsa-mir-99a // chr21:17911409-17911489 (+)
20500119	4.50306	-0.04297	P	24.876	2.42281	P	1.81533	-1.35364	P	4.93232	0.08839	P	4.77536	0.04173	P	1.79245	-1.37194	A	10.3981	3.83338	2.71253	1.43964	0.564838	PA	0	miRNA	miRBase	Homo sapiens	hsa-let-7d-5p	chr9:96941123-96941144 (+)	22	AGAGGUAGUAGGUUGCAUAGUU	MIMAT0000065_st	MIMAT0000065	ENST00000416309 // antisense // intron // 3 /// ENST00000602602 // antisense // intron // 2 /// ENST00000602703 // sense // intron // 1 /// OTTHUMT00000053172 // antisense // intron // 3 /// OTTHUMT00000467607 // antisense // intron // 2 /// OTTHUMT00000467752 // sense // intron // 1	hsa-let-7a-1 // chr9:96938239-96938318 (+) /// hsa-let-7d // chr9:96941116-96941202 (+) /// hsa-let-7f-1 // chr9:96938629-96938715 (+)
20500120	1.96015	0.43099	P	1.44372	-0.01019	A	1.29001	-0.17259	A	1.45395	0	A	2.91514	1.00359	P	1.45395	0	A	1.56463	1.94101	0.806088	-0.310992	0.543849	PA	0	miRNA	miRBase	Homo sapiens	hsa-let-7d-3p	chr9:96941177-96941198 (+)	22	CUAUACGACCUGCUGCCUUUCU	MIMAT0004484_st	MIMAT0004484	ENST00000416309 // antisense // intron // 3 /// ENST00000602602 // antisense // intron // 2 /// ENST00000602703 // sense // intron // 1 /// OTTHUMT00000053172 // antisense // intron // 3 /// OTTHUMT00000467607 // antisense // intron // 2 /// OTTHUMT00000467752 // sense // intron // 1	hsa-let-7a-1 // chr9:96938239-96938318 (+) /// hsa-let-7d // chr9:96941116-96941202 (+) /// hsa-let-7f-1 // chr9:96938629-96938715 (+)
20500121	1.25523	-0.63649	A	2.37617	0.28419	P	1.52646	-0.35426	P	7.50432	1.94328	P	2.58094	0.40345	P	1.36031	-0.52051	A	1.71929	3.81519	0.450642	-1.14994	0.333621	PA	0	miRNA	miRBase	Homo sapiens	hsa-let-7e-5p	chr19:52196046-52196067 (+)	22	UGAGGUAGGAGGUUGUAUAGUU	MIMAT0000066_st	MIMAT0000066	ENST00000602324 // antisense // exon // 1 /// OTTHUMT00000467329 // antisense // exon // 1	hsa-let-7e // chr19:52196039-52196117 (+) /// hsa-mir-125a // chr19:52196507-52196592 (+) /// hsa-mir-99b // chr19:52195865-52195934 (+)
20500122	1.19817	-0.01812	A	1.19817	-0.01812	A	1.3691	0.17427	A	1.16106	-0.06352	A	1.391	0.19716	A	1.22847	0.0179	A	1.25515	1.26018	0.996008	-0.00577005	0.966288	AA	0	miRNA	miRBase	Homo sapiens	hsa-let-7e-3p	chr19:52196091-52196112 (+)	22	CUAUACGGCCUCCUAGCUUUCC	MIMAT0004485_st	MIMAT0004485	ENST00000602324 // antisense // exon // 1 /// OTTHUMT00000467329 // antisense // exon // 1	hsa-let-7e // chr19:52196039-52196117 (+) /// hsa-mir-125a // chr19:52196507-52196592 (+) /// hsa-mir-99b // chr19:52195865-52195934 (+)
20500123	1.136	-0.05755	A	1.136	-0.05755	A	1.22847	0.05535	A	1.32847	0.16825	A	1.12686	-0.06921	A	1.22847	0.05535	A	1.16682	1.22793	0.950233	-0.0736461	0.413096	AA	0	miRNA	miRBase	Homo sapiens	hsa-let-7f-5p	chr9:96938635-96938656 (+) /// chrX:53584207-53584228 (-)	22	UGAGGUAGUAGAUUGUAUAGUU	MIMAT0000067_st	MIMAT0000067	ENST00000602703 // sense // intron // 1 /// OTTHUMT00000467752 // sense // intron // 1 /// ENST00000262854 // sense // intron // 60 /// ENST00000342160 // sense // intron // 59 /// ENST00000427052 // sense // intron // 34 /// OTTHUMT00000056766 // sense // intron // 59 /// OTTHUMT00000056767 // sense // intron // 34	hsa-let-7a-1 // chr9:96938239-96938318 (+) /// hsa-let-7d // chr9:96941116-96941202 (+) /// hsa-let-7f-1 // chr9:96938629-96938715 (+) /// hsa-let-7f-2 // chrX:53584153-53584235 (-) /// hsa-mir-98 // chrX:53583184-53583302 (-)
20500124	1.45043	0.02848	P	1.25834	-0.17648	A	1.21462	-0.22749	A	1.39373	-0.02905	A	1.47279	0.05055	A	1.78409	0.32719	A	1.3078	1.5502	0.843629	-0.245319	0.144431	PA	0	miRNA	miRBase	Homo sapiens	hsa-let-7f-1-3p	chr9:96938691-96938712 (+)	22	CUAUACAAUCUAUUGCCUUCCC	MIMAT0004486_st	MIMAT0004486	ENST00000602703 // sense // intron // 1 /// OTTHUMT00000467752 // sense // intron // 1	hsa-let-7a-1 // chr9:96938239-96938318 (+) /// hsa-let-7d // chr9:96941116-96941202 (+) /// hsa-let-7f-1 // chr9:96938629-96938715 (+)
20500125	1.22727	-0.0007	A	1.33403	0.11964	A	0.94894	-0.37177	A	1.05767	-0.21527	A	1.22847	0.0007	A	1.46066	0.25047	A	1.17008	1.24893	0.936863	-0.0940893	0.655401	AA	0	miRNA	miRBase	Homo sapiens	hsa-let-7f-2-3p	chrX:53584157-53584178 (-)	22	CUAUACAGUCUACUGUCUUUCC	MIMAT0004487_st	MIMAT0004487	ENST00000262854 // sense // intron // 60 /// ENST00000342160 // sense // intron // 59 /// ENST00000427052 // sense // intron // 34 /// OTTHUMT00000056766 // sense // intron // 59 /// OTTHUMT00000056767 // sense // intron // 34	hsa-let-7f-2 // chrX:53584153-53584235 (-) /// hsa-mir-98 // chrX:53583184-53583302 (-)
20500126	1.26835	0.11379	A	0.95295	-0.29868	A	1.12616	-0.05775	A	0.93412	-0.32748	A	1.25772	0.10165	A	1.21814	0.05553	A	1.11582	1.13666	0.981666	-0.0266965	0.900537	AA	0	miRNA	miRBase	Homo sapiens	hsa-miR-15a-5p	chr13:50623303-50623324 (-)	22	UAGCAGCACAUAAUGGUUUGUG	MIMAT0000068_st	MIMAT0000068	ENST00000235290 // sense // intron // 4 /// ENST00000421758 // sense // exon // 3 /// ENST00000425586 // sense // intron // 4 /// ENST00000433070 // sense // intron // 3 /// ENST00000443587 // sense // intron // 5 /// ENST00000449579 // sense // exon // 4 /// ENST00000458725 // sense // intron // 4 /// OTTHUMT00000044954 // sense // intron // 3 /// OTTHUMT00000044955 // sense // exon // 3 /// OTT…	hsa-mir-15a // chr13:50623255-50623337 (-) /// hsa-mir-16-1 // chr13:50623109-50623197 (-)
20500127	1.37977	0.08047	A	1.22847	-0.0871	A	1.43847	0.14058	A	1.52203	0.22204	A	1.22847	-0.0871	A	1.23006	-0.08522	A	1.3489	1.32685	1.01662	0.0237781	0.830995	AA	0	miRNA	miRBase	Homo sapiens	hsa-miR-15a-3p	chr13:50623266-50623287 (-)	22	CAGGCCAUAUUGUGCUGCCUCA	MIMAT0004488_st	MIMAT0004488	ENST00000235290 // sense // intron // 4 /// ENST00000421758 // sense // exon // 3 /// ENST00000425586 // sense // intron // 4 /// ENST00000433070 // sense // intron // 3 /// ENST00000443587 // sense // intron // 5 /// ENST00000449579 // sense // exon // 4 /// ENST00000458725 // sense // intron // 4 /// OTTHUMT00000044954 // sense // intron // 3 /// OTTHUMT00000044955 // sense // exon // 3 /// OTT…	hsa-mir-15a // chr13:50623255-50623337 (-) /// hsa-mir-16-1 // chr13:50623109-50623197 (-)
20500128	25.876	3.73296	P	1.32679	-0.55264	P	2.32708	0.25794	P	1.3059	-0.57553	A	18.9206	3.28131	P	1.5651	-0.31432	A	9.8433	7.26388	1.3551	0.438402	0.856523	PA	0	miRNA	miRBase	Homo sapiens	hsa-miR-16-5p	chr13:50623163-50623184 (-) /// chr3:160122542-160122563 (+)	22	UAGCAGCACGUAAAUAUUGGCG	MIMAT0000069_st	MIMAT0000069	ENST00000235290 // sense // intron // 4 /// ENST00000425586 // sense // intron // 4 /// ENST00000433070 // sense // intron // 3 /// ENST00000443587 // sense // intron // 5 /// ENST00000458725 // sense // intron // 4 /// OTTHUMT00000044954 // sense // intron // 3 /// OTTHUMT00000044957 // sense // intron // 4 /// OTTHUMT00000044958 // sense // intron // 5 /// OTTHUMT00000044961 // sense // intron …	hsa-mir-15a // chr13:50623255-50623337 (-) /// hsa-mir-16-1 // chr13:50623109-50623197 (-) /// hsa-mir-16-2 // chr3:160122533-160122613 (+) /// hsa-mir-15b // chr3:160122376-160122473 (+)
20500129	1.07603	-0.33603	A	1.22468	-0.14935	A	1.30647	-0.05608	A	2.0567	0.59858	P	1.64894	0.27978	P	1.41004	0.05398	A	1.20239	1.70523	0.705122	-0.504055	0.050958	PA	0	miRNA	miRBase	Homo sapiens	hsa-miR-16-1-3p	chr13:50623121-50623142 (-)	22	CCAGUAUUAACUGUGCUGCUGA	MIMAT0004489_st	MIMAT0004489	ENST00000235290 // sense // intron // 4 /// ENST00000425586 // sense // intron // 4 /// ENST00000433070 // sense // intron // 3 /// ENST00000443587 // sense // intron // 5 /// ENST00000458725 // sense // intron // 4 /// OTTHUMT00000044954 // sense // intron // 3 /// OTTHUMT00000044957 // sense // intron // 4 /// OTTHUMT00000044958 // sense // intron // 5 /// OTTHUMT00000044961 // sense // intron …	hsa-mir-15a // chr13:50623255-50623337 (-) /// hsa-mir-16-1 // chr13:50623109-50623197 (-)
20500130	57.0425	1.36842	P	49.0552	1.15079	P	24.876	0.17114	P	5.1101	-2.11219	P	19.3108	-0.19421	P	2.2492	-3.29613	P	43.6579	8.89002	4.91089	2.29598	0.0472223	PP	0	miRNA	miRBase	Homo sapiens	hsa-miR-17-5p	chr13:92002872-92002894 (+)	23	CAAAGUGCUUACAGUGCAGGUAG	MIMAT0000070_st	MIMAT0000070	ENST00000400282 // sense // intron // 3 /// ENST00000581816 // sense // exon // 3 /// ENST00000582141 // sense // exon // 2 /// OTTHUMT00000045448 // sense // intron // 3 /// OTTHUMT00000442497 // sense // exon // 2 /// OTTHUMT00000442498 // sense // exon // 3	hsa-mir-17 // chr13:92002859-92002942 (+) /// hsa-mir-18a // chr13:92003005-92003075 (+) /// hsa-mir-19a // chr13:92003145-92003226 (+) /// hsa-mir-19b-1 // chr13:92003446-92003532 (+) /// hsa-mir-20a // chr13:92003319-92003389 (+) /// hsa-mir-92a-1 // chr13:92003568-92003645 (+)
20500131	1.50718	0.295	A	1.02533	-0.26077	A	1.40877	0.19758	A	1.22847	0	A	1.22847	0	A	1.22847	0	A	1.31376	1.22847	1.06943	0.0968391	0.675376	AA	0	miRNA	miRBase	Homo sapiens	hsa-miR-17-3p	chr13:92002909-92002930 (+)	22	ACUGCAGUGAAGGCACUUGUAG	MIMAT0000071_st	MIMAT0000071	ENST00000400282 // sense // intron // 3 /// ENST00000581816 // sense // exon // 3 /// ENST00000582141 // sense // exon // 2 /// OTTHUMT00000045448 // sense // intron // 3 /// OTTHUMT00000442497 // sense // exon // 2 /// OTTHUMT00000442498 // sense // exon // 3	hsa-mir-17 // chr13:92002859-92002942 (+) /// hsa-mir-18a // chr13:92003005-92003075 (+) /// hsa-mir-19a // chr13:92003145-92003226 (+) /// hsa-mir-19b-1 // chr13:92003446-92003532 (+) /// hsa-mir-20a // chr13:92003319-92003389 (+) /// hsa-mir-92a-1 // chr13:92003568-92003645 (+)
20500132	5.38343	1.92609	P	1.38809	-0.02934	A	2.52392	0.83323	P	1.21681	-0.21933	A	1.40097	-0.01601	A	1.43223	0.01583	A	3.09848	1.35	2.29516	1.1986	0.159958	PA	0	miRNA	miRBase	Homo sapiens	hsa-miR-18a-5p	chr13:92003010-92003032 (+)	23	UAAGGUGCAUCUAGUGCAGAUAG	MIMAT0000072_st	MIMAT0000072	ENST00000362310 // sense // exon // 1 /// ENST00000400282 // sense // intron // 3 /// ENST00000581816 // sense // exon // 3 /// ENST00000582141 // sense // exon // 2 /// OTTHUMT00000045448 // sense // intron // 3 /// OTTHUMT00000442497 // sense // exon // 2 /// OTTHUMT00000442498 // sense // exon // 3	hsa-mir-17 // chr13:92002859-92002942 (+) /// hsa-mir-18a // chr13:92003005-92003075 (+) /// hsa-mir-19a // chr13:92003145-92003226 (+) /// hsa-mir-19b-1 // chr13:92003446-92003532 (+) /// hsa-mir-20a // chr13:92003319-92003389 (+) /// hsa-mir-92a-1 // chr13:92003568-92003645 (+)
20500133	1.73845	0.37975	A	1.1266	-0.24607	A	1.42937	0.09733	A	1.24498	-0.10192	A	1.34377	0.00824	A	1.32847	-0.00828	A	1.43147	1.30574	1.09629	0.132633	0.579218	AA	0	miRNA	miRBase	Homo sapiens	hsa-miR-18a-3p	chr13:92003051-92003073 (+)	23	ACUGCCCUAAGUGCUCCUUCUGG	MIMAT0002891_st	MIMAT0002891	ENST00000362310 // sense // exon // 1 /// ENST00000400282 // sense // intron // 3 /// ENST00000581816 // sense // exon // 3 /// ENST00000582141 // sense // exon // 2 /// OTTHUMT00000045448 // sense // intron // 3 /// OTTHUMT00000442497 // sense // exon // 2 /// OTTHUMT00000442498 // sense // exon // 3	hsa-mir-17 // chr13:92002859-92002942 (+) /// hsa-mir-18a // chr13:92003005-92003075 (+) /// hsa-mir-19a // chr13:92003145-92003226 (+) /// hsa-mir-19b-1 // chr13:92003446-92003532 (+) /// hsa-mir-20a // chr13:92003319-92003389 (+) /// hsa-mir-92a-1 // chr13:92003568-92003645 (+)
20500134	1.03701	-0.16003	A	1.136	-0.0285	A	1.18133	0.02795	A	1.22847	0.0844	A	1.05048	-0.1414	A	1.2935	0.15882	A	1.11811	1.19082	0.938947	-0.0908849	0.455891	AA	0	miRNA	miRBase	Homo sapiens	hsa-miR-19a-5p	chr13:92003158-92003179 (+)	22	AGUUUUGCAUAGUUGCACUACA	MIMAT0004490_st	MIMAT0004490	ENST00000400282 // sense // intron // 3 /// ENST00000581816 // sense // exon // 3 /// ENST00000582141 // sense // exon // 2 /// OTTHUMT00000045448 // sense // intron // 3 /// OTTHUMT00000442497 // sense // exon // 2 /// OTTHUMT00000442498 // sense // exon // 3	hsa-mir-17 // chr13:92002859-92002942 (+) /// hsa-mir-18a // chr13:92003005-92003075 (+) /// hsa-mir-19a // chr13:92003145-92003226 (+) /// hsa-mir-19b-1 // chr13:92003446-92003532 (+) /// hsa-mir-20a // chr13:92003319-92003389 (+) /// hsa-mir-92a-1 // chr13:92003568-92003645 (+)
20500135	1.27612	0.1098	A	1.1826	0	A	1.1826	0	A	1.15297	-0.0366	A	0.98593	-0.2624	A	1.35024	0.19126	A	1.21377	1.16305	1.04362	0.06159	0.622092	AA	0	miRNA	miRBase	Homo sapiens	hsa-miR-19a-3p	chr13:92003193-92003215 (+)	23	UGUGCAAAUCUAUGCAAAACUGA	MIMAT0000073_st	MIMAT0000073	ENST00000400282 // sense // intron // 3 /// ENST00000581816 // sense // exon // 3 /// ENST00000582141 // sense // exon // 2 /// OTTHUMT00000045448 // sense // intron // 3 /// OTTHUMT00000442497 // sense // exon // 2 /// OTTHUMT00000442498 // sense // exon // 3	hsa-mir-17 // chr13:92002859-92002942 (+) /// hsa-mir-18a // chr13:92003005-92003075 (+) /// hsa-mir-19a // chr13:92003145-92003226 (+) /// hsa-mir-19b-1 // chr13:92003446-92003532 (+) /// hsa-mir-20a // chr13:92003319-92003389 (+) /// hsa-mir-92a-1 // chr13:92003568-92003645 (+)
20500136	1.17999	-0.11485	A	1.21302	-0.07501	A	1.37075	0.10135	A	1.26763	-0.01149	A	1.2879	0.0114	A	1.45801	0.19038	A	1.25459	1.33785	0.937766	-0.0927006	0.370107	AA	0	miRNA	miRBase	Homo sapiens	hsa-miR-19b-1-5p	chr13:92003461-92003483 (+)	23	AGUUUUGCAGGUUUGCAUCCAGC	MIMAT0004491_st	MIMAT0004491	ENST00000400282 // sense // intron // 3 /// ENST00000581816 // sense // exon // 3 /// ENST00000582141 // sense // exon // 2 /// OTTHUMT00000045448 // sense // intron // 3 /// OTTHUMT00000442497 // sense // exon // 2 /// OTTHUMT00000442498 // sense // exon // 3	hsa-mir-17 // chr13:92002859-92002942 (+) /// hsa-mir-18a // chr13:92003005-92003075 (+) /// hsa-mir-19a // chr13:92003145-92003226 (+) /// hsa-mir-19b-1 // chr13:92003446-92003532 (+) /// hsa-mir-20a // chr13:92003319-92003389 (+) /// hsa-mir-92a-1 // chr13:92003568-92003645 (+)
20500137	4.1749	1.53013	P	1.22847	-0.23476	A	5.32111	1.88011	P	1.19979	-0.26884	A	1.66263	0.20185	A	1.19979	-0.26884	A	3.57483	1.35407	2.64006	1.40057	0.157004	PA	0	miRNA	miRBase	Homo sapiens	hsa-miR-19b-3p	chr13:92003499-92003521 (+) /// chrX:133303713-133303735 (-)	23	UGUGCAAAUCCAUGCAAAACUGA	MIMAT0000074_st	MIMAT0000074	ENST00000400282 // sense // intron // 3 /// ENST00000581816 // sense // exon // 3 /// ENST00000582141 // sense // exon // 2 /// OTTHUMT00000045448 // sense // intron // 3 /// OTTHUMT00000442497 // sense // exon // 2 /// OTTHUMT00000442498 // sense // exon // 3 /// ENST00000385077 // sense // exon // 1	hsa-mir-17 // chr13:92002859-92002942 (+) /// hsa-mir-18a // chr13:92003005-92003075 (+) /// hsa-mir-19a // chr13:92003145-92003226 (+) /// hsa-mir-19b-1 // chr13:92003446-92003532 (+) /// hsa-mir-20a // chr13:92003319-92003389 (+) /// hsa-mir-92a-1 // chr13:92003568-92003645 (+) /// hsa-mir-19b-2 // chrX:133303701-133303796 (-) /// hsa-mir-92a-2 // chrX:133303568-133303642 (-) /// hsa-mir-106a /…
20500138	1.05048	-0.1129	A	1.136	0	A	1.136	0	A	1.136	0	A	1.136	0	A	1.22847	0.1129	A	1.10749	1.16682	0.949153	-0.0752881	0.2302	AA	0	miRNA	miRBase	Homo sapiens	hsa-miR-19b-2-5p	chrX:133303757-133303778 (-)	22	AGUUUUGCAGGUUUGCAUUUCA	MIMAT0004492_st	MIMAT0004492	ENST00000385077 // sense // exon // 1	hsa-mir-19b-2 // chrX:133303701-133303796 (-) /// hsa-mir-92a-2 // chrX:133303568-133303642 (-) /// hsa-mir-106a // chrX:133304228-133304308 (-) /// hsa-mir-363 // chrX:133303408-133303482 (-) /// hsa-mir-18b // chrX:133304071-133304141 (-) /// hsa-mir-20b // chrX:133303839-133303907 (-)
20500139	20.8309	1.79817	P	6.53556	0.12583	P	7.70086	0.36254	P	1.76887	-1.75965	A	5.44381	-0.13786	P	1.91962	-1.64166	P	11.6891	3.0441	3.83992	1.94107	0.058235	PA	0	miRNA	miRBase	Homo sapiens	hsa-miR-20a-5p	chr13:92003326-92003348 (+)	23	UAAAGUGCUUAUAGUGCAGGUAG	MIMAT0000075_st	MIMAT0000075	ENST00000400282 // sense // intron // 3 /// ENST00000581816 // sense // exon // 3 /// ENST00000582141 // sense // exon // 2 /// OTTHUMT00000045448 // sense // intron // 3 /// OTTHUMT00000442497 // sense // exon // 2 /// OTTHUMT00000442498 // sense // exon // 3	hsa-mir-17 // chr13:92002859-92002942 (+) /// hsa-mir-18a // chr13:92003005-92003075 (+) /// hsa-mir-19a // chr13:92003145-92003226 (+) /// hsa-mir-19b-1 // chr13:92003446-92003532 (+) /// hsa-mir-20a // chr13:92003319-92003389 (+) /// hsa-mir-92a-1 // chr13:92003568-92003645 (+)
20500140	1.05048	-0.2308	A	1.08499	-0.18417	A	1.22847	-0.00499	A	1.31431	0.09246	A	1.23698	0.00497	A	1.38699	0.17011	A	1.12131	1.31276	0.854165	-0.227414	0.0520825	AA	0	miRNA	miRBase	Homo sapiens	hsa-miR-20a-3p	chr13:92003362-92003383 (+)	22	ACUGCAUUAUGAGCACUUAAAG	MIMAT0004493_st	MIMAT0004493	ENST00000400282 // sense // intron // 3 /// ENST00000581816 // sense // exon // 3 /// ENST00000582141 // sense // exon // 2 /// OTTHUMT00000045448 // sense // intron // 3 /// OTTHUMT00000442497 // sense // exon // 2 /// OTTHUMT00000442498 // sense // exon // 3	hsa-mir-17 // chr13:92002859-92002942 (+) /// hsa-mir-18a // chr13:92003005-92003075 (+) /// hsa-mir-19a // chr13:92003145-92003226 (+) /// hsa-mir-19b-1 // chr13:92003446-92003532 (+) /// hsa-mir-20a // chr13:92003319-92003389 (+) /// hsa-mir-92a-1 // chr13:92003568-92003645 (+)
20500141	1.16227	0.04403	A	1.0924	-0.04542	A	1.25274	0.15216	A	1.07124	-0.07364	A	1.07124	-0.07364	A	1.48952	0.40193	A	1.16914	1.21067	0.965697	-0.0503581	0.847235	AA	0	miRNA	miRBase	Homo sapiens	hsa-miR-21-5p	chr17:57918634-57918655 (+)	22	UAGCUUAUCAGACUGAUGUUGA	MIMAT0000076_st	MIMAT0000076	ENST00000592790 // sense // exon // 1 /// OTTHUMT00000448807 // sense // exon // 1	---
20500142	1.44996	0.19911	A	1.1704	-0.10992	A	1.15197	-0.13281	A	1.19876	-0.07537	A	1.38019	0.12796	A	1.32734	0.07163	A	1.25744	1.3021	0.965707	-0.0503432	0.672817	AA	0	miRNA	miRBase	Homo sapiens	hsa-miR-21-3p	chr17:57918672-57918692 (+)	21	CAACACCAGUCGAUGGGCUGU	MIMAT0004494_st	MIMAT0004494	ENST00000592790 // sense // exon // 1 /// OTTHUMT00000448807 // sense // exon // 1	---
20500143	1.23871	0.1129	A	0.99489	-0.20333	A	1.14547	0	A	1.14547	0	A	1.14547	0	A	1.33954	0.2258	A	1.12636	1.21016	0.93075	-0.103534	0.426739	AA	0	miRNA	miRBase	Homo sapiens	hsa-miR-22-5p	chr17:1617246-1617267 (-)	22	AGUUCUUCAGUGGCAAGCUUUA	MIMAT0004495_st	MIMAT0004495	ENST00000334146 // sense // exon // 3 /// ENST00000362190 // sense // exon // 1 /// ENST00000570416 // sense // exon // 2 /// ENST00000571091 // sense // exon // 2 /// ENST00000571595 // sense // exon // 2 /// ENST00000573075 // sense // exon // 3 /// ENST00000573127 // sense // exon // 3 /// ENST00000574016 // sense // exon // 3 /// ENST00000574306 // sense // exon // 2 /// ENST00000575626 // se…	---
20500144	19.6401	1.61676	P	1.90726	-1.74747	P	12.849	1.00461	P	1.02314	-2.64597	A	10.9007	0.76738	P	1.37757	-2.21684	A	11.4654	4.43381	2.58591	1.37067	0.328819	PA	0	miRNA	miRBase	Homo sapiens	hsa-miR-22-3p	chr17:1617208-1617229 (-)	22	AAGCUGCCAGUUGAAGAACUGU	MIMAT0000077_st	MIMAT0000077	ENST00000334146 // sense // exon // 3 /// ENST00000362190 // sense // exon // 1 /// ENST00000570416 // sense // exon // 2 /// ENST00000571091 // sense // exon // 2 /// ENST00000571595 // sense // exon // 2 /// ENST00000573075 // sense // exon // 3 /// ENST00000573127 // sense // exon // 3 /// ENST00000574016 // sense // exon // 3 /// ENST00000574306 // sense // exon // 2 /// ENST00000575626 // se…	---
20500145	4.98942	0.89186	P	1.96375	-0.4534	P	3.41404	0.34447	P	1.93283	-0.47629	P	5.23041	0.95991	P	1.42996	-0.91103	A	3.45574	2.8644	1.20644	0.27076	0.588635	PA	0	miRNA	miRBase	Homo sapiens	hsa-miR-23a-5p	chr19:13947444-13947465 (-)	22	GGGGUUCCUGGGGAUGGGAUUU	MIMAT0004496_st	MIMAT0004496	---	hsa-mir-23a // chr19:13947401-13947473 (-) /// hsa-mir-24-2 // chr19:13947101-13947173 (-) /// hsa-mir-27a // chr19:13947254-13947331 (-)
20500146	59.2007	2.94205	P	9.5118	0.30422	P	3.24903	-1.24549	P	5.89501	-0.386	P	75.1515	3.28623	P	1.74313	-2.14382	A	23.9872	27.5965	0.869209	-0.202225	0.846828	PA	0	miRNA	miRBase	Homo sapiens	hsa-miR-23a-3p	chr19:13947409-13947429 (-)	21	AUCACAUUGCCAGGGAUUUCC	MIMAT0000078_st	MIMAT0000078	---	hsa-mir-23a // chr19:13947401-13947473 (-) /// hsa-mir-24-2 // chr19:13947101-13947173 (-) /// hsa-mir-27a // chr19:13947254-13947331 (-)
20500147	0.88278	-0.47325	A	1.18133	-0.05297	A	1.136	-0.10942	A	1.26968	0.05109	A	1.32847	0.11639	A	1.32847	0.11639	A	1.0667	1.30887	0.814978	-0.295166	0.0832928	AA	0	miRNA	miRBase	Homo sapiens	hsa-miR-24-1-5p	chr9:97848309-97848330 (+)	22	UGCCUACUGAGCUGAUAUCAGU	MIMAT0000079_st	MIMAT0000079	ENST00000297979 // sense // intron // 14 /// ENST00000375315 // sense // intron // 15 /// ENST00000384885 // antisense // exon // 1 /// ENST00000428313 // sense // intron // 15 /// ENST00000463372 // sense // intron // 5 /// ENST00000468164 // sense // intron // 4 /// ENST00000471978 // sense // intron // 5 /// ENST00000478473 // sense // exon // 7 /// OTTHUMT00000053196 // sense // intron // 5 /…	hsa-mir-24-1 // chr9:97848303-97848370 (+) /// hsa-mir-23b // chr9:97847490-97847586 (+) /// hsa-mir-27b // chr9:97847727-97847823 (+) /// hsa-mir-3074 // chr9:97848296-97848376 (-)
20500148	212.305	1.02674	P	161.599	0.63302	P	123.342	0.24326	P	29.1056	-1.84004	P	85.065	-0.29276	P	46.7092	-1.15762	P	165.749	53.6266	3.0908	1.62798	0.0260215	PP	0	miRNA	miRBase	Homo sapiens	hsa-miR-24-3p	chr19:13947103-13947124 (-) /// chr9:97848346-97848367 (+)	22	UGGCUCAGUUCAGCAGGAACAG	MIMAT0000080_st	MIMAT0000080	ENST00000297979 // sense // intron // 14 /// ENST00000375315 // sense // intron // 15 /// ENST00000384885 // antisense // exon // 1 /// ENST00000428313 // sense // intron // 15 /// ENST00000463372 // sense // intron // 5 /// ENST00000468164 // sense // intron // 4 /// ENST00000471978 // sense // intron // 5 /// ENST00000478473 // sense // exon // 7 /// OTTHUMT00000053196 // sense // intron // 5 /…	hsa-mir-24-1 // chr9:97848303-97848370 (+) /// hsa-mir-23b // chr9:97847490-97847586 (+) /// hsa-mir-27b // chr9:97847727-97847823 (+) /// hsa-mir-3074 // chr9:97848296-97848376 (-) /// hsa-mir-23a // chr19:13947401-13947473 (-) /// hsa-mir-24-2 // chr19:13947101-13947173 (-) /// hsa-mir-27a // chr19:13947254-13947331 (-)
20500149	1.32847	0.19758	A	1.15844	0	A	1.20467	0.05645	A	1.15844	0	A	1.03013	-0.16935	A	1.15844	0	A	1.23053	1.11567	1.10295	0.141366	0.158302	AA	0	miRNA	miRBase	Homo sapiens	hsa-miR-24-2-5p	chr19:13947140-13947161 (-)	22	UGCCUACUGAGCUGAAACACAG	MIMAT0004497_st	MIMAT0004497	ENST00000587762 // sense // exon // 1 /// OTTHUMT00000457941 // sense // exon // 1	hsa-mir-23a // chr19:13947401-13947473 (-) /// hsa-mir-24-2 // chr19:13947101-13947173 (-) /// hsa-mir-27a // chr19:13947254-13947331 (-)
20500150	2.09144	0.50665	P	1.70621	0.21295	A	2.98475	1.01977	P	1.22847	-0.26099	A	1.23792	-0.24992	A	1.23792	-0.24992	A	2.2608	1.23477	1.83095	0.872591	0.0241321	PA	0	miRNA	miRBase	Homo sapiens	hsa-miR-25-5p	chr7:99691233-99691253 (-)	21	AGGCGGAGACUUGGGCAAUUG	MIMAT0004498_st	MIMAT0004498	ENST00000303887 // sense // intron // 13 /// ENST00000343023 // sense // intron // 8 /// ENST00000354230 // sense // intron // 12 /// ENST00000485286 // sense // intron // 12 /// ENST00000489841 // sense // intron // 12 /// ENST00000491245 // sense // intron // 4 /// ENST00000493352 // sense // intron // 2 /// OTTHUMT00000336534 // sense // intron // 13 /// OTTHUMT00000336598 // sense // intron /…	hsa-mir-25 // chr7:99691183-99691266 (-) /// hsa-mir-93 // chr7:99691391-99691470 (-) /// hsa-mir-106b // chr7:99691616-99691697 (-)
20500151	51.3652	2.76511	P	4.38062	-0.78647	P	10.7312	0.50613	P	1.84899	-2.03087	P	48.2451	2.6747	P	1.88094	-2.00615	A	22.159	17.325	1.27902	0.355037	0.532077	PA	0	miRNA	miRBase	Homo sapiens	hsa-miR-25-3p	chr7:99691194-99691215 (-)	22	CAUUGCACUUGUCUCGGUCUGA	MIMAT0000081_st	MIMAT0000081	ENST00000303887 // sense // intron // 13 /// ENST00000343023 // sense // intron // 8 /// ENST00000354230 // sense // intron // 12 /// ENST00000485286 // sense // intron // 12 /// ENST00000489841 // sense // intron // 12 /// ENST00000491245 // sense // intron // 4 /// ENST00000493352 // sense // intron // 2 /// OTTHUMT00000336534 // sense // intron // 13 /// OTTHUMT00000336598 // sense // intron /…	hsa-mir-25 // chr7:99691183-99691266 (-) /// hsa-mir-93 // chr7:99691391-99691470 (-) /// hsa-mir-106b // chr7:99691616-99691697 (-)
20500152	20.2289	3.22024	P	1.96569	-0.14307	P	2.37556	0.13016	P	1.25247	-0.79333	A	7.93778	1.87063	P	1.38563	-0.64757	A	8.19006	3.52529	2.32323	1.21613	0.539671	PA	0	miRNA	miRBase	Homo sapiens	hsa-miR-26a-5p	chr12:58218441-58218462 (-) /// chr3:38010904-38010925 (+)	22	UUCAAGUAAUCCAGGAUAGGCU	MIMAT0000082_st	MIMAT0000082	ENST00000273179 // sense // intron // 5 /// ENST00000310189 // sense // intron // 4 /// ENST00000443503 // sense // intron // 4 /// ENST00000447745 // sense // intron // 2 /// ENST00000486978 // sense // intron // 5 /// OTTHUMT00000342392 // sense // intron // 5 /// OTTHUMT00000342393 // sense // intron // 5 /// OTTHUMT00000342394 // sense // intron // 4 /// OTTHUMT00000342397 // sense // intron …	---
20500153	1.01706	-0.1687	A	1.42424	0.31708	A	1.19845	0.06806	A	1.2033	0.07388	A	1.05048	-0.12205	A	1.088	-0.07143	A	1.21325	1.11393	1.08917	0.123223	0.502179	AA	0	miRNA	miRBase	Homo sapiens	hsa-miR-26a-1-3p	chr3:38010943-38010964 (+)	22	CCUAUUCUUGGUUACUUGCACG	MIMAT0004499_st	MIMAT0004499	ENST00000273179 // sense // intron // 5 /// ENST00000310189 // sense // intron // 4 /// ENST00000443503 // sense // intron // 4 /// ENST00000447745 // sense // intron // 2 /// ENST00000486978 // sense // intron // 5 /// OTTHUMT00000342392 // sense // intron // 5 /// OTTHUMT00000342393 // sense // intron // 5 /// OTTHUMT00000342394 // sense // intron // 4 /// OTTHUMT00000342397 // sense // intron …	---
20500154	1.15844	-0.08781	A	1.48402	0.26953	A	1.23113	0	A	1.23113	0	A	1.3198	0.10033	A	1.22847	-0.00313	A	1.2912	1.2598	1.02492	0.035514	0.814978	AA	0	miRNA	miRBase	Homo sapiens	hsa-miR-26b-5p	chr2:219267380-219267400 (+)	21	UUCAAGUAAUUCAGGAUAGGU	MIMAT0000083_st	MIMAT0000083	ENST00000273062 // sense // intron // 4 /// ENST00000428361 // sense // intron // 4 /// ENST00000443891 // sense // intron // 4 /// ENST00000452977 // sense // intron // 4 /// ENST00000464255 // sense // intron // 4 /// ENST00000473420 // sense // intron // 4 /// ENST00000482272 // sense // intron // 3 /// ENST00000488627 // sense // intron // 4 /// ENST00000491064 // sense // intron // 4 /// ENS…	---
20500155	1.22847	0.01256	A	1.20717	-0.01267	A	1.41989	0.22149	A	1.19915	-0.02229	A	1.05048	-0.21324	A	1.41108	0.2125	A	1.28518	1.22024	1.05322	0.0748057	0.60118	AA	0	miRNA	miRBase	Homo sapiens	hsa-miR-26b-3p	chr2:219267415-219267436 (+)	22	CCUGUUCUCCAUUACUUGGCUC	MIMAT0004500_st	MIMAT0004500	ENST00000273062 // sense // intron // 4 /// ENST00000428361 // sense // intron // 4 /// ENST00000443891 // sense // intron // 4 /// ENST00000452977 // sense // intron // 4 /// ENST00000464255 // sense // intron // 4 /// ENST00000473420 // sense // intron // 4 /// ENST00000482272 // sense // intron // 3 /// ENST00000488627 // sense // intron // 4 /// ENST00000491064 // sense // intron // 4 /// ENS…	---
20500156	1.136	0	A	1.05048	-0.1129	A	1.22847	0.1129	A	1.136	0	A	1.136	0	A	1.19871	0.07752	A	1.13832	1.1569	0.983934	-0.0233664	0.731156	AA	0	miRNA	miRBase	Homo sapiens	hsa-miR-27a-5p	chr19:13947301-13947322 (-)	22	AGGGCUUAGCUGCUUGUGAGCA	MIMAT0004501_st	MIMAT0004501	---	hsa-mir-23a // chr19:13947401-13947473 (-) /// hsa-mir-24-2 // chr19:13947101-13947173 (-) /// hsa-mir-27a // chr19:13947254-13947331 (-)
20500157	1.73871	0.49198	P	1.05089	-0.23443	A	1.24415	0.00912	A	1.21298	-0.02748	A	1.26003	0.02742	A	1.22847	-0.00918	A	1.34458	1.23383	1.08977	0.124019	0.689599	PA	0	miRNA	miRBase	Homo sapiens	hsa-miR-27a-3p	chr19:13947261-13947281 (-)	21	UUCACAGUGGCUAAGUUCCGC	MIMAT0000084_st	MIMAT0000084	---	hsa-mir-23a // chr19:13947401-13947473 (-) /// hsa-mir-24-2 // chr19:13947101-13947173 (-) /// hsa-mir-27a // chr19:13947254-13947331 (-)
20500158	1.59998	0.57119	P	1.10329	0.03495	A	1.05048	-0.03581	A	1.05048	-0.03581	A	1.05048	-0.03581	A	1.10329	0.03495	A	1.25125	1.06808	1.17149	0.228346	0.353811	PA	0	miRNA	miRBase	Homo sapiens	hsa-miR-28-5p	chr3:188406582-188406603 (+)	22	AAGGAGCUCACAGUCUAUUGAG	MIMAT0000085_st	MIMAT0000085	ENST00000312675 // sense // intron // 6 /// ENST00000415906 // sense // intron // 1 /// ENST00000448637 // sense // intron // 6 /// ENST00000471917 // sense // intron // 2 /// ENST00000543006 // sense // intron // 6 /// OTTHUMT00000344030 // sense // intron // 6 /// OTTHUMT00000344031 // sense // intron // 6 /// OTTHUMT00000344045 // sense // intron // 2 /// OTTHUMT00000344048 // sense // intron …	---
20500159	1.22847	0.00714	A	1.2358	0.01572	A	1.21634	-0.00717	A	1.11882	-0.12774	A	1.16357	-0.07116	A	1.46647	0.26262	A	1.22687	1.24962	0.981794	-0.0265071	0.901902	AA	0	miRNA	miRBase	Homo sapiens	hsa-miR-28-3p	chr3:188406622-188406643 (+)	22	CACUAGAUUGUGAGCUCCUGGA	MIMAT0004502_st	MIMAT0004502	ENST00000312675 // sense // intron // 6 /// ENST00000415906 // sense // intron // 1 /// ENST00000448637 // sense // intron // 6 /// ENST00000471917 // sense // intron // 2 /// ENST00000543006 // sense // intron // 6 /// OTTHUMT00000344030 // sense // intron // 6 /// OTTHUMT00000344031 // sense // intron // 6 /// OTTHUMT00000344045 // sense // intron // 2 /// OTTHUMT00000344048 // sense // intron …	---
20500160	1.22847	0	A	1.17372	-0.06576	A	1.22847	0	A	1.32847	0.1129	A	1.136	-0.1129	A	1.37259	0.16004	A	1.21022	1.27902	0.946209	-0.0797695	0.435933	AA	0	miRNA	miRBase	Homo sapiens	hsa-miR-29a-5p	chr7:130561545-130561566 (-)	22	ACUGAUUUCUUUUGGUGUUCAG	MIMAT0004503_st	MIMAT0004503	ENST00000362111 // sense // exon // 1 /// ENST00000447430 // antisense // intron // 2 /// OTTHUMT00000338093 // antisense // intron // 2	hsa-mir-29a // chr7:130561506-130561569 (-) /// hsa-mir-29b-1 // chr7:130562218-130562298 (-)
20500161	8.33182	2.40118	P	1.46826	-0.10334	P	2.06188	0.38651	P	1.10472	-0.51377	A	1.68632	0.09643	P	1.29844	-0.28067	A	3.95399	1.36316	2.9006	1.53635	0.225108	PA	0	miRNA	miRBase	Homo sapiens	hsa-miR-29a-3p	chr7:130561507-130561528 (-)	22	UAGCACCAUCUGAAAUCGGUUA	MIMAT0000086_st	MIMAT0000086	ENST00000362111 // sense // exon // 1 /// ENST00000447430 // antisense // intron // 2 /// OTTHUMT00000338093 // antisense // intron // 2	hsa-mir-29a // chr7:130561506-130561569 (-) /// hsa-mir-29b-1 // chr7:130562218-130562298 (-)
20500162	2.05537	0.57295	P	1.23825	-0.15814	A	1.38881	0.0074	A	1.18759	-0.21841	A	1.89268	0.45398	P	1.3746	-0.00744	A	1.56081	1.48496	1.05108	0.0718741	0.838413	PA	0	miRNA	miRBase	Homo sapiens	hsa-miR-30a-5p	chr6:72113298-72113319 (-)	22	UGUAAACAUCCUCGACUGGAAG	MIMAT0000087_st	MIMAT0000087	ENST00000413945 // sense // intron // 3 /// ENST00000436803 // sense // intron // 3 /// ENST00000602823 // sense // intron // 2 /// OTTHUMT00000041155 // sense // intron // 3 /// OTTHUMT00000041167 // sense // intron // 3 /// OTTHUMT00000467928 // sense // intron // 2	---
20500163	1.32046	0.1228	A	1.36289	0.16843	A	1.07189	-0.17808	A	1.21189	-0.00098	A	1.02019	-0.24941	A	1.21354	0.00098	A	1.25175	1.14854	1.08986	0.124142	0.42706	AA	0	miRNA	miRBase	Homo sapiens	hsa-miR-30a-3p	chr6:72113257-72113278 (-)	22	CUUUCAGUCGGAUGUUUGCAGC	MIMAT0000088_st	MIMAT0000088	ENST00000413945 // sense // intron // 3 /// ENST00000436803 // sense // intron // 3 /// ENST00000602823 // sense // intron // 2 /// OTTHUMT00000041155 // sense // intron // 3 /// OTTHUMT00000041167 // sense // intron // 3 /// OTTHUMT00000467928 // sense // intron // 2	---
20500164	1.50877	0.10919	A	1.22847	-0.18732	A	1.41138	0.01292	A	1.18701	-0.23685	A	1.39879	0	A	1.39879	0	A	1.38287	1.3282	1.04117	0.0582002	0.652418	AA	0	miRNA	miRBase	Homo sapiens	hsa-miR-31-5p	chr9:21512157-21512177 (-)	21	AGGCAAGAUGCUGGCAUAGCU	MIMAT0000089_st	MIMAT0000089	ENST00000304425 // sense // intron // 1 /// OTTHUMT00000051910 // sense // intron // 1	---
20500165	1.03581	-0.33463	A	1.19515	-0.1282	A	1.50867	0.20789	P	1.39463	0.0945	A	1.21778	-0.10113	A	1.63509	0.32398	A	1.24654	1.41583	0.880431	-0.183718	0.394651	PA	0	miRNA	miRBase	Homo sapiens	hsa-miR-31-3p	chr9:21512120-21512141 (-)	22	UGCUAUGCCAACAUAUUGCCAU	MIMAT0004504_st	MIMAT0004504	ENST00000304425 // sense // intron // 1 /// OTTHUMT00000051910 // sense // intron // 1	---
20500166	1.83851	0.44186	P	1.22847	-0.13982	A	1.31886	-0.03739	A	1.38811	0.03644	A	1.61844	0.25792	A	1.20109	-0.17234	A	1.46195	1.40255	1.04235	0.0598419	0.838122	PA	0	miRNA	miRBase	Homo sapiens	hsa-miR-32-5p	chr9:111808552-111808573 (-)	22	UAUUGCACAUUACUAAGUUGCA	MIMAT0000090_st	MIMAT0000090	ENST00000374586 // sense // intron // 14 /// ENST00000413712 // sense // intron // 8 /// ENST00000491854 // sense // intron // 12 /// OTTHUMT00000053587 // sense // intron // 14 /// OTTHUMT00000053588 // sense // intron // 12 /// OTTHUMT00000356304 // sense // intron // 8	---
20500167	1.23925	-0.12882	A	1.05048	-0.36723	A	1.46066	0.10834	A	1.24932	-0.11714	A	1.63369	0.26985	A	1.59974	0.23956	A	1.25013	1.49425	0.836627	-0.257343	0.232969	AA	0	miRNA	miRBase	Homo sapiens	hsa-miR-32-3p	chr9:111808511-111808532 (-)	22	CAAUUUAGUGUGUGUGAUAUUU	MIMAT0004505_st	MIMAT0004505	ENST00000374586 // sense // intron // 14 /// ENST00000413712 // sense // intron // 8 /// ENST00000491854 // sense // intron // 12 /// OTTHUMT00000053587 // sense // intron // 14 /// OTTHUMT00000053588 // sense // intron // 12 /// OTTHUMT00000356304 // sense // intron // 8	---
20500168	1.22847	0.07587	A	1.33397	0.19473	A	1.1026	-0.08008	A	0.92724	-0.32998	A	1.06758	-0.12665	A	1.24846	0.09915	A	1.22168	1.08109	1.13004	0.176375	0.282665	AA	0	miRNA	miRBase	Homo sapiens	hsa-miR-33a-5p	chr22:42296953-42296973 (+)	21	GUGCAUUGUAGUUGCAUUGCA	MIMAT0000091_st	MIMAT0000091	ENST00000361204 // sense // intron // 16 /// ENST00000424354 // sense // intron // 19 /// ENST00000435061 // sense // intron // 2 /// ENST00000490262 // sense // intron // 1 /// ENST00000491541 // sense // intron // 10 /// OTTHUMT00000321956 // sense // intron // 16 /// OTTHUMT00000321957 // sense // intron // 19 /// OTTHUMT00000321958 // sense // intron // 10 /// OTTHUMT00000321959 // sense // i…	---
20500169	1.05048	-0.19758	A	1.20467	0	A	1.20467	0	A	1.20467	0	A	0.95367	-0.33706	A	1.20467	0	A	1.15327	1.121	1.02879	0.0409439	0.739119	AA	0	miRNA	miRBase	Homo sapiens	hsa-miR-33a-3p	chr22:42296993-42297014 (+)	22	CAAUGUUUCCACAGUGCAUCAC	MIMAT0004506_st	MIMAT0004506	ENST00000361204 // sense // intron // 16 /// ENST00000424354 // sense // intron // 19 /// ENST00000435061 // sense // intron // 2 /// ENST00000490262 // sense // intron // 1 /// ENST00000491541 // sense // intron // 10 /// OTTHUMT00000321956 // sense // intron // 16 /// OTTHUMT00000321957 // sense // intron // 19 /// OTTHUMT00000321958 // sense // intron // 10 /// OTTHUMT00000321959 // sense // i…	---
20500170	1.24993	-0.07583	A	1.13525	-0.21466	A	1.48567	0.17343	A	1.30717	-0.01123	A	1.36425	0.05043	A	1.3276	0.01114	A	1.29028	1.33301	0.96795	-0.0469961	0.652776	AA	0	miRNA	miRBase	Homo sapiens	hsa-miR-92a-1-5p	chr13:92003578-92003600 (+)	23	AGGUUGGGAUCGGUUGCAAUGCU	MIMAT0004507_st	MIMAT0004507	ENST00000385233 // sense // exon // 1 /// ENST00000400282 // sense // intron // 3 /// ENST00000581816 // sense // exon // 3 /// ENST00000582141 // sense // exon // 2 /// OTTHUMT00000045448 // sense // intron // 3 /// OTTHUMT00000442497 // sense // exon // 2 /// OTTHUMT00000442498 // sense // exon // 3	hsa-mir-17 // chr13:92002859-92002942 (+) /// hsa-mir-18a // chr13:92003005-92003075 (+) /// hsa-mir-19a // chr13:92003145-92003226 (+) /// hsa-mir-19b-1 // chr13:92003446-92003532 (+) /// hsa-mir-20a // chr13:92003319-92003389 (+) /// hsa-mir-92a-1 // chr13:92003568-92003645 (+)
20500171	438.845	2.44576	P	77.4162	-0.05725	P	83.6835	0.05506	P	67.6084	-0.25268	P	702.927	3.12542	P	25.178	-1.67772	P	199.982	265.238	0.75397	-0.40742	0.812359	PP	0	miRNA	miRBase	Homo sapiens	hsa-miR-92a-3p	chr13:92003615-92003636 (+) /// chrX:133303574-133303595 (-)	22	UAUUGCACUUGUCCCGGCCUGU	MIMAT0000092_st	MIMAT0000092	ENST00000385233 // sense // exon // 1 /// ENST00000400282 // sense // intron // 3 /// ENST00000581816 // sense // exon // 3 /// ENST00000582141 // sense // exon // 2 /// OTTHUMT00000045448 // sense // intron // 3 /// OTTHUMT00000442497 // sense // exon // 2 /// OTTHUMT00000442498 // sense // exon // 3	hsa-mir-17 // chr13:92002859-92002942 (+) /// hsa-mir-18a // chr13:92003005-92003075 (+) /// hsa-mir-19a // chr13:92003145-92003226 (+) /// hsa-mir-19b-1 // chr13:92003446-92003532 (+) /// hsa-mir-20a // chr13:92003319-92003389 (+) /// hsa-mir-92a-1 // chr13:92003568-92003645 (+) /// hsa-mir-19b-2 // chrX:133303701-133303796 (-) /// hsa-mir-92a-2 // chrX:133303568-133303642 (-) /// hsa-mir-106a /…
20500172	1.23755	0.03368	A	1.24764	0.04539	A	1.05825	-0.19212	A	1.00942	-0.26029	A	1.18044	-0.03448	A	1.47147	0.28345	A	1.18115	1.22044	0.967801	-0.0472172	0.85632	AA	0	miRNA	miRBase	Homo sapiens	hsa-miR-92a-2-5p	chrX:133303613-133303634 (-)	22	GGGUGGGGAUUUGUUGCAUUAC	MIMAT0004508_st	MIMAT0004508	---	hsa-mir-19b-2 // chrX:133303701-133303796 (-) /// hsa-mir-92a-2 // chrX:133303568-133303642 (-) /// hsa-mir-106a // chrX:133304228-133304308 (-) /// hsa-mir-363 // chrX:133303408-133303482 (-) /// hsa-mir-18b // chrX:133304071-133304141 (-) /// hsa-mir-20b // chrX:133303839-133303907 (-)
20500173	122.164	1.5249	P	38.6131	-0.13675	P	46.2913	0.1249	P	3.68246	-3.5271	P	73.8259	0.79829	P	1.4697	-4.85225	A	69.0227	26.326	2.62184	1.39058	0.16421	PA	0	miRNA	miRBase	Homo sapiens	hsa-miR-93-5p	chr7:99691438-99691460 (-)	23	CAAAGUGCUGUUCGUGCAGGUAG	MIMAT0000093_st	MIMAT0000093	ENST00000303887 // sense // intron // 13 /// ENST00000343023 // sense // intron // 8 /// ENST00000354230 // sense // intron // 12 /// ENST00000485286 // sense // intron // 12 /// ENST00000489841 // sense // intron // 12 /// ENST00000491245 // sense // intron // 4 /// ENST00000493352 // sense // intron // 2 /// OTTHUMT00000336534 // sense // intron // 13 /// OTTHUMT00000336598 // sense // intron /…	hsa-mir-25 // chr7:99691183-99691266 (-) /// hsa-mir-93 // chr7:99691391-99691470 (-) /// hsa-mir-106b // chr7:99691616-99691697 (-)
20500174	1.23843	0.00276	A	1.06067	-0.22078	A	1.44793	0.22824	A	1.21965	-0.01928	A	1.49034	0.26989	A	1.23369	-0.00277	A	1.24901	1.31456	0.950135	-0.073795	0.646502	AA	0	miRNA	miRBase	Homo sapiens	hsa-miR-93-3p	chr7:99691400-99691421 (-)	22	ACUGCUGAGCUAGCACUUCCCG	MIMAT0004509_st	MIMAT0004509	ENST00000303887 // sense // intron // 13 /// ENST00000343023 // sense // intron // 8 /// ENST00000354230 // sense // intron // 12 /// ENST00000485286 // sense // intron // 12 /// ENST00000489841 // sense // intron // 12 /// ENST00000491245 // sense // intron // 4 /// ENST00000493352 // sense // intron // 2 /// OTTHUMT00000336534 // sense // intron // 13 /// OTTHUMT00000336598 // sense // intron /…	hsa-mir-25 // chr7:99691183-99691266 (-) /// hsa-mir-93 // chr7:99691391-99691470 (-) /// hsa-mir-106b // chr7:99691616-99691697 (-)
20500175	1.29993	0.03654	A	1.52615	0.268	A	1.23491	-0.03749	A	1.136	-0.15794	A	1.056	-0.26329	A	1.29993	0.03654	A	1.35366	1.16398	1.16296	0.217807	0.16281	AA	0	miRNA	miRBase	Homo sapiens	hsa-miR-95-5p	chr4:8007074-8007094 (-)	21	UCAAUAAAUGUCUGUUGAAUU	MIMAT0026473_st	MIMAT0026473	ENST00000296372 // sense // intron // 16 /// ENST00000318888 // sense // intron // 15 /// ENST00000341937 // sense // intron // 15 /// ENST00000361581 // sense // intron // 15 /// ENST00000361737 // sense // intron // 14 /// ENST00000407564 // sense // intron // 13 /// ENST00000447017 // sense // intron // 16 /// ENST00000505872 // sense // intron // 13 /// ENST00000512594 // sense // intron // 4…	---
20500176	1.25274	0.18284	A	1.30793	0.24504	A	1.05048	-0.07118	A	1.05048	-0.07118	A	1.07124	-0.04296	A	1.136	0.04172	A	1.20372	1.08591	1.10849	0.148596	0.235338	AA	0	miRNA	miRBase	Homo sapiens	hsa-miR-95-3p	chr4:8007039-8007060 (-)	22	UUCAACGGGUAUUUAUUGAGCA	MIMAT0000094_st	MIMAT0000094	ENST00000296372 // sense // intron // 16 /// ENST00000318888 // sense // intron // 15 /// ENST00000341937 // sense // intron // 15 /// ENST00000361581 // sense // intron // 15 /// ENST00000361737 // sense // intron // 14 /// ENST00000407564 // sense // intron // 13 /// ENST00000447017 // sense // intron // 16 /// ENST00000505872 // sense // intron // 13 /// ENST00000512594 // sense // intron // 4…	---
20500177	1.136	-0.01893	A	1.136	-0.01893	A	1.166	0.01868	A	1.22847	0.09397	A	0.93626	-0.2979	A	1.19871	0.05859	A	1.146	1.12115	1.02217	0.031632	0.754895	AA	0	miRNA	miRBase	Homo sapiens	hsa-miR-96-5p	chr7:129414579-129414601 (-)	23	UUUGGCACUAGCACAUUUUUGCU	MIMAT0000095_st	MIMAT0000095	---	hsa-mir-96 // chr7:129414532-129414609 (-) /// hsa-mir-182 // chr7:129410223-129410332 (-) /// hsa-mir-183 // chr7:129414745-129414854 (-)
20500178	1.2378	-0.09337	A	1.17208	-0.17208	A	1.40332	0.08769	A	1.43105	0.11592	A	1.4723	0.15692	A	1.22372	-0.10988	A	1.27107	1.37569	0.923948	-0.114116	0.372179	AA	0	miRNA	miRBase	Homo sapiens	hsa-miR-96-3p	chr7:129414537-129414558 (-)	22	AAUCAUGUGCAGUGCCAAUAUG	MIMAT0004510_st	MIMAT0004510	---	hsa-mir-96 // chr7:129414532-129414609 (-) /// hsa-mir-182 // chr7:129410223-129410332 (-) /// hsa-mir-183 // chr7:129414745-129414854 (-)
20500179	1.22847	0.2258	A	1.05048	0	A	1.05048	0	A	1.05048	0	A	1.05048	0	A	1.05048	0	A	1.10981	1.05048	1.05648	0.079264	0.373901	AA	0	miRNA	miRBase	Homo sapiens	hsa-miR-98-5p	chrX:53583260-53583281 (-)	22	UGAGGUAGUAAGUUGUAUUGUU	MIMAT0000096_st	MIMAT0000096	ENST00000262854 // sense // intron // 60 /// ENST00000342160 // sense // intron // 59 /// ENST00000427052 // sense // intron // 34 /// OTTHUMT00000056766 // sense // intron // 59 /// OTTHUMT00000056767 // sense // intron // 34	hsa-let-7f-2 // chrX:53584153-53584235 (-) /// hsa-mir-98 // chrX:53583184-53583302 (-)
20500180	1.05048	-0.03504	A	1.22847	0.19077	A	1.0924	0.02141	A	1.22865	0.19099	A	0.9364	-0.20089	A	1.06021	-0.02174	A	1.12378	1.07509	1.0453	0.0639109	0.625993	AA	0	miRNA	miRBase	Homo sapiens	hsa-miR-98-3p	chrX:53583202-53583223 (-)	22	CUAUACAACUUACUACUUUCCC	MIMAT0022842_st	MIMAT0022842	ENST00000262854 // sense // intron // 60 /// ENST00000342160 // sense // intron // 59 /// ENST00000427052 // sense // intron // 34 /// OTTHUMT00000056766 // sense // intron // 59 /// OTTHUMT00000056767 // sense // intron // 34	hsa-let-7f-2 // chrX:53584153-53584235 (-) /// hsa-mir-98 // chrX:53583184-53583302 (-)
20500181	2.74605	1.04438	P	1.16332	-0.19473	A	1.30244	-0.03176	A	1.13123	-0.23508	A	1.41529	0.08812	A	1.36042	0.03107	A	1.73727	1.30231	1.33399	0.415745	0.481259	PA	0	miRNA	miRBase	Homo sapiens	hsa-miR-99a-5p	chr21:17911421-17911442 (+)	22	AACCCGUAGAUCCGAUCUUGUG	MIMAT0000097_st	MIMAT0000097	ENST00000400178 // sense // intron // 5 /// ENST00000418813 // sense // intron // 3 /// ENST00000428669 // sense // intron // 5 /// ENST00000441820 // sense // intron // 1 /// ENST00000445461 // sense // intron // 5 /// ENST00000453910 // sense // intron // 3 /// ENST00000456342 // sense // intron // 6 /// ENST00000458468 // sense // intron // 6 /// ENST00000602280 // sense // intron // 1 /// ENS…	hsa-let-7c // chr21:17912148-17912231 (+) /// hsa-mir-99a // chr21:17911409-17911489 (+)
20500182	0.95374	-0.18068	A	1.00494	-0.10524	A	1.29317	0.25856	A	0.93664	-0.20679	A	1.15704	0.09808	A	1.19728	0.14741	A	1.08395	1.09699	0.988116	-0.0172478	0.905969	AA	0	miRNA	miRBase	Homo sapiens	hsa-miR-99a-3p	chr21:17911458-17911479 (+)	22	CAAGCUCGCUUCUAUGGGUCUG	MIMAT0004511_st	MIMAT0004511	ENST00000400178 // sense // intron // 5 /// ENST00000418813 // sense // intron // 3 /// ENST00000428669 // sense // intron // 5 /// ENST00000441820 // sense // intron // 1 /// ENST00000445461 // sense // intron // 5 /// ENST00000453910 // sense // intron // 3 /// ENST00000456342 // sense // intron // 6 /// ENST00000458468 // sense // intron // 6 /// ENST00000602280 // sense // intron // 1 /// ENS…	hsa-let-7c // chr21:17912148-17912231 (+) /// hsa-mir-99a // chr21:17911409-17911489 (+)
20500183	1.71348	0.45673	P	1.45925	0.22503	A	1.23848	-0.01163	A	1.23774	-0.01249	A	1.25852	0.01153	A	1.0418	-0.26112	A	1.4704	1.17935	1.24679	0.318216	0.125572	PA	0	miRNA	miRBase	Homo sapiens	hsa-miR-100-5p	chr11:122022983-122023004 (-)	22	AACCCGUAGAUCCGAACUUGUG	MIMAT0000098_st	MIMAT0000098	---	hsa-let-7a-2 // chr11:122017230-122017301 (-) /// hsa-mir-100 // chr11:122022937-122023016 (-)
20500184	1.15284	0.02768	A	1.34816	0.25348	A	1.00129	-0.17565	A	1.00129	-0.17565	A	1.10902	-0.02822	A	1.15284	0.02768	A	1.16743	1.08772	1.07329	0.102033	0.533508	AA	0	miRNA	miRBase	Homo sapiens	hsa-miR-100-3p	chr11:122022948-122022969 (-)	22	CAAGCUUGUAUCUAUAGGUAUG	MIMAT0004512_st	MIMAT0004512	---	hsa-let-7a-2 // chr11:122017230-122017301 (-) /// hsa-mir-100 // chr11:122022937-122023016 (-)
20500185	8.32859	0.98974	P	3.83187	-0.13028	P	2.4224	-0.79189	P	4.55614	0.11948	P	11.9853	1.51486	P	2.79753	-0.58417	P	4.86095	6.44631	0.754068	-0.407234	0.705521	PP	0	miRNA	miRBase	Homo sapiens	hsa-miR-101-5p	chr1:65524160-65524181 (-)	22	CAGUUAUCACAGUGCUGAUGCU	MIMAT0004513_st	MIMAT0004513	---	hsa-mir-101-1 // chr1:65524117-65524191 (-) /// hsa-mir-3671 // chr1:65523438-65523525 (-)
20500186	1.10095	-0.05173	A	1.01017	-0.17587	A	1.2935	0.18081	A	1.18133	0.04994	A	1.18133	0.04994	A	1.08788	-0.06896	A	1.13487	1.15018	0.986692	-0.0193284	0.828161	AA	0	miRNA	miRBase	Homo sapiens	hsa-miR-101-3p	chr1:65524125-65524145 (-) /// chr9:4850345-4850365 (+)	21	UACAGUACUGUGAUAACUGAA	MIMAT0000099_st	MIMAT0000099	ENST00000362195 // sense // exon // 1 /// ENST00000381728 // sense // intron // 4 /// ENST00000381730 // sense // intron // 4 /// ENST00000381750 // sense // intron // 8 /// ENST00000442869 // sense // intron // 7 /// ENST00000448872 // sense // intron // 4 /// OTTHUMT00000051587 // sense // intron // 8 /// OTTHUMT00000051588 // sense // intron // 4 /// OTTHUMT00000051589 // sense // intron // 7 …	hsa-mir-101-1 // chr1:65524117-65524191 (-) /// hsa-mir-3671 // chr1:65523438-65523525 (-)
20500187	1.20467	0.09541	A	1.05048	-0.10217	A	1.22847	0.12364	A	1.05048	-0.10217	A	1.05048	-0.10217	A	1.38148	0.29299	A	1.16121	1.16081	1.00034	0.000488764	0.952887	AA	0	miRNA	miRBase	Homo sapiens	hsa-miR-29b-1-5p	chr7:130562266-130562289 (-)	24	GCUGGUUUCAUAUGGUGGUUUAGA	MIMAT0004514_st	MIMAT0004514	ENST00000447430 // antisense // intron // 2 /// OTTHUMT00000338093 // antisense // intron // 2	hsa-mir-29a // chr7:130561506-130561569 (-) /// hsa-mir-29b-1 // chr7:130562218-130562298 (-)
20500188	1.19673	0.00706	A	1.05048	-0.18098	A	1.18505	-0.00709	A	1.32405	0.15292	A	1.01412	-0.23182	A	1.21454	0.02837	A	1.14409	1.18424	0.966096	-0.0497611	0.75194	AA	0	miRNA	miRBase	Homo sapiens	hsa-miR-29b-3p	chr1:207975795-207975817 (-) /// chr7:130562226-130562248 (-)	23	UAGCACCAUUUGAAAUCAGUGUU	MIMAT0000100_st	MIMAT0000100	ENST00000447430 // antisense // intron // 2 /// OTTHUMT00000338093 // antisense // intron // 2	hsa-mir-29a // chr7:130561506-130561569 (-) /// hsa-mir-29b-1 // chr7:130562218-130562298 (-) /// hsa-mir-29b-2 // chr1:207975788-207975868 (-) /// hsa-mir-29c // chr1:207975197-207975284 (-)
20500189	1.23696	-0.00666	A	1.03792	-0.25976	A	1.19501	-0.05643	A	1.2484	0.00663	A	1.35009	0.1196	A	2.79568	1.16974	P	1.15663	1.79806	0.643267	-0.636511	0.226931	PA	0	miRNA	miRBase	Homo sapiens	hsa-miR-29b-2-5p	chr1:207975837-207975858 (-)	22	CUGGUUUCACAUGGUGGCUUAG	MIMAT0004515_st	MIMAT0004515	---	hsa-mir-29b-2 // chr1:207975788-207975868 (-) /// hsa-mir-29c // chr1:207975197-207975284 (-)
20500190	1.23404	-0.16146	A	1.42081	0.04186	A	1.21456	-0.18442	A	1.42081	0.04186	P	1.71582	0.31404	A	1.33954	-0.04311	A	1.2898	1.49206	0.864447	-0.210151	0.187592	PA	0	miRNA	miRBase	Homo sapiens	hsa-miR-103a-2-5p	chr20:3898151-3898173 (+)	23	AGCUUCUUUACAGUGCUGCCUUG	MIMAT0009196_st	MIMAT0009196	ENST00000316562 // sense // intron // 5 /// ENST00000336066 // sense // intron // 5 /// ENST00000495692 // sense // intron // 5 /// ENST00000497424 // sense // intron // 5 /// OTTHUMT00000077787 // sense // intron // 5 /// OTTHUMT00000077788 // sense // intron // 5 /// OTTHUMT00000077789 // sense // intron // 5 /// OTTHUMT00000077793 // sense // intron // 5	hsa-mir-103a-2 // chr20:3898141-3898218 (+) /// hsa-mir-103b-2 // chr20:3898149-3898210 (-)
20500191	15.716	2.69158	P	1.77437	-0.45527	P	3.07303	0.33708	P	1.79245	-0.44065	A	5.80736	1.2553	P	1.25601	-0.95374	A	6.85448	2.95194	2.32202	1.21538	0.478176	PA	0	miRNA	miRBase	Homo sapiens	hsa-miR-103a-3p	chr20:3898188-3898210 (+) /// chr5:167987909-167987931 (-)	23	AGCAGCAUUGUACAGGGCUAUGA	MIMAT0000101_st	MIMAT0000101	ENST00000316562 // sense // intron // 5 /// ENST00000336066 // sense // intron // 5 /// ENST00000495692 // sense // intron // 5 /// ENST00000497424 // sense // intron // 5 /// OTTHUMT00000077787 // sense // intron // 5 /// OTTHUMT00000077788 // sense // intron // 5 /// OTTHUMT00000077789 // sense // intron // 5 /// OTTHUMT00000077793 // sense // intron // 5 /// ENST00000239231 // sense // intron …	hsa-mir-103a-2 // chr20:3898141-3898218 (+) /// hsa-mir-103b-2 // chr20:3898149-3898210 (-) /// hsa-mir-103a-1 // chr5:167987901-167987978 (-) /// hsa-mir-103b-1 // chr5:167987909-167987970 (+)
20500192	1.1678	0.08337	A	0.99185	-0.15224	A	1.1247	0.02911	A	1.07976	-0.02971	A	1.05511	-0.06303	A	1.63357	0.56761	A	1.09478	1.25615	0.871541	-0.19836	0.473299	AA	0	miRNA	miRBase	Homo sapiens	hsa-miR-105-5p	chrX:151560737-151560759 (-) /// chrX:151562930-151562952 (-)	23	UCAAAUGCUCAGACUCCUGUGGU	MIMAT0000102_st	MIMAT0000102	ENST00000370311 // sense // intron // 1 /// ENST00000370314 // sense // intron // 1 /// OTTHUMT00000060921 // sense // intron // 1 /// OTTHUMT00000060922 // sense // intron // 1 /// ENST00000370311 // sense // intron // 1 /// ENST00000370314 // sense // intron // 1 /// OTTHUMT00000060921 // sense // intron // 1 /// OTTHUMT00000060922 // sense // intron // 1	hsa-mir-105-1 // chrX:151560691-151560771 (-) /// hsa-mir-105-2 // chrX:151562884-151562964 (-) /// hsa-mir-767 // chrX:151561893-151562001 (-) /// hsa-mir-105-1 // chrX:151560691-151560771 (-) /// hsa-mir-105-2 // chrX:151562884-151562964 (-) /// hsa-mir-767 // chrX:151561893-151562001 (-)
20500193	1.24858	0.04794	A	1.21495	0.00856	A	1.03107	-0.2282	A	1.19583	-0.01433	A	1.31799	0.126	A	1.20058	-0.00861	A	1.16487	1.23813	0.940825	-0.0880019	0.401485	AA	0	miRNA	miRBase	Homo sapiens	hsa-miR-105-3p	chrX:151560700-151560721 (-) /// chrX:151562893-151562914 (-)	22	ACGGAUGUUUGAGCAUGUGCUA	MIMAT0004516_st	MIMAT0004516	ENST00000370311 // sense // intron // 1 /// ENST00000370314 // sense // intron // 1 /// OTTHUMT00000060921 // sense // intron // 1 /// OTTHUMT00000060922 // sense // intron // 1 /// ENST00000370311 // sense // intron // 1 /// ENST00000370314 // sense // intron // 1 /// OTTHUMT00000060921 // sense // intron // 1 /// OTTHUMT00000060922 // sense // intron // 1	hsa-mir-105-1 // chrX:151560691-151560771 (-) /// hsa-mir-105-2 // chrX:151562884-151562964 (-) /// hsa-mir-767 // chrX:151561893-151562001 (-) /// hsa-mir-105-1 // chrX:151560691-151560771 (-) /// hsa-mir-105-2 // chrX:151562884-151562964 (-) /// hsa-mir-767 // chrX:151561893-151562001 (-)
20500194	61.9313	1.63745	P	34.4904	0.79298	P	23.0368	0.21072	P	6.97105	-1.51377	P	16.7757	-0.24685	P	1.96339	-3.3418	P	39.8195	8.57004	4.64637	2.2161	0.0594589	PP	0	miRNA	miRBase	Homo sapiens	hsa-miR-106a-5p	chrX:133304274-133304296 (-)	23	AAAAGUGCUUACAGUGCAGGUAG	MIMAT0000103_st	MIMAT0000103	---	hsa-mir-19b-2 // chrX:133303701-133303796 (-) /// hsa-mir-92a-2 // chrX:133303568-133303642 (-) /// hsa-mir-106a // chrX:133304228-133304308 (-) /// hsa-mir-363 // chrX:133303408-133303482 (-) /// hsa-mir-18b // chrX:133304071-133304141 (-) /// hsa-mir-20b // chrX:133303839-133303907 (-)
20500195	1.38193	0.1464	A	1.24858	0	A	1.66465	0.41494	A	1.24858	0	A	1.10184	-0.18037	A	1.24858	0	A	1.43172	1.19967	1.19343	0.255116	0.142247	AA	0	miRNA	miRBase	Homo sapiens	hsa-miR-106a-3p	chrX:133304238-133304259 (-)	22	CUGCAAUGUAAGCACUUCUUAC	MIMAT0004517_st	MIMAT0004517	---	hsa-mir-19b-2 // chrX:133303701-133303796 (-) /// hsa-mir-92a-2 // chrX:133303568-133303642 (-) /// hsa-mir-106a // chrX:133304228-133304308 (-) /// hsa-mir-363 // chrX:133303408-133303482 (-) /// hsa-mir-18b // chrX:133304071-133304141 (-) /// hsa-mir-20b // chrX:133303839-133303907 (-)
20500196	15.9157	1.78214	P	7.61181	0.718	P	2.33958	-0.984	P	1.69481	-1.44912	A	6.91549	0.57959	P	1.62286	-1.5117	A	8.62237	3.41105	2.52777	1.33787	0.287055	PA	0	miRNA	miRBase	Homo sapiens	hsa-miR-107	chr10:91352513-91352535 (-)	23	AGCAGCAUUGUACAGGGCUAUCA	MIMAT0000104_st	MIMAT0000104	ENST00000307534 // sense // intron // 5 /// ENST00000322191 // sense // intron // 4 /// ENST00000342512 // sense // intron // 5 /// ENST00000362127 // sense // exon // 1 /// ENST00000371774 // sense // intron // 6 /// OTTHUMT00000049317 // sense // intron // 5 /// OTTHUMT00000049318 // sense // intron // 4	---
20500197	4.05406	0.71857	P	1.96675	-0.32499	P	2.46365	0	P	2.46365	0	P	5.56134	1.17463	P	1.31415	-0.90666	A	2.82815	3.11305	0.908484	-0.138467	0.953635	PA	0	miRNA	miRBase	Homo sapiens	hsa-miR-16-2-3p	chr3:160122585-160122606 (+)	22	CCAAUAUUACUGUGCUGCUUUA	MIMAT0004518_st	MIMAT0004518	ENST00000344722 // sense // intron // 4 /// ENST00000357388 // sense // intron // 5 /// ENST00000360111 // sense // intron // 5 /// ENST00000462787 // sense // intron // 4 /// ENST00000467468 // sense // intron // 4 /// ENST00000468653 // sense // intron // 5 /// ENST00000469762 // sense // intron // 5 /// ENST00000469858 // sense // intron // 3 /// ENST00000470240 // sense // intron // 2 /// ENS…	hsa-mir-16-2 // chr3:160122533-160122613 (+) /// hsa-mir-15b // chr3:160122376-160122473 (+)
20500198	1.29241	0.1464	A	0.86725	-0.42913	A	1.16769	0	A	1.15297	-0.0183	A	1.16769	0	A	1.3884	0.24977	A	1.10912	1.23635	0.897087	-0.15668	0.424971	AA	0	miRNA	miRBase	Drosophila melanogaster	dme-miR-1-5p	2L:20487458-20487479 (+)	22	CCAUGCUUCCUUGCAUUCAAUA	MIMAT0020779_st	MIMAT0020779	---	---
20500199	1.05048	0	A	1.05048	0	A	1.22847	0.2258	A	1.05048	0	A	0.93626	-0.16607	A	1.24904	0.24977	A	1.10981	1.07859	1.02894	0.0411617	0.756053	AA	0	miRNA	miRBase	Drosophila melanogaster	dme-miR-1-3p	2L:20487496-20487517 (+)	22	UGGAAUGUAAAGAAGUAUGGAG	MIMAT0000105_st	MIMAT0000105	---	---
20500200	1.21508	0.10101	A	0.98197	-0.20629	A	1.28507	0.18181	A	1.02097	-0.1501	A	1.30501	0.20402	A	1.05076	-0.10861	A	1.16071	1.12558	1.03121	0.0443348	0.80135	AA	0	miRNA	miRBase	Drosophila melanogaster	dme-miR-2a-1-5p	2L:19569945-19569966 (-)	22	CUCUCAAAGUGGUUGUGAAAUG	MIMAT0020780_st	MIMAT0020780	FBtr0081267 // sense // intron // 1 /// FBtr0081268 // sense // intron // 2 /// FBtr0081269 // sense // intron // 2 /// FBtr0081270 // sense // intron // 1 /// FBtr0100597 // sense // intron // 2	dme-mir-2a-1 // 2L:19569897-19569972 (-) /// dme-mir-2a-2 // 2L:19569490-19569561 (-) /// dme-mir-2b-2 // 2L:19570182-19570264 (-)
20500201	1.22847	0	A	1.22847	0	A	1.67699	0.44902	A	1.05048	-0.2258	A	1.22847	0	A	1.22847	0	A	1.37798	1.16914	1.17862	0.237104	0.250511	AA	0	miRNA	miRBase	Drosophila melanogaster	dme-miR-2a-3p	2L:19569496-19569518 (-) /// 2L:19569902-19569924 (-)	23	UAUCACAGCCAGCUUUGAUGAGC	MIMAT0000106_st	MIMAT0000106	FBtr0081267 // sense // intron // 1 /// FBtr0081268 // sense // intron // 2 /// FBtr0081269 // sense // intron // 2 /// FBtr0081270 // sense // intron // 1 /// FBtr0100597 // sense // intron // 2 /// FBtr0081267 // sense // intron // 1 /// FBtr0081268 // sense // intron // 2 /// FBtr0081269 // sense // intron // 2 /// FBtr0081270 // sense // intron // 1 /// FBtr0100597 // sense // intron // 2	dme-mir-2a-1 // 2L:19569897-19569972 (-) /// dme-mir-2a-2 // 2L:19569490-19569561 (-) /// dme-mir-2b-2 // 2L:19570182-19570264 (-) /// dme-mir-2a-1 // 2L:19569897-19569972 (-) /// dme-mir-2a-2 // 2L:19569490-19569561 (-) /// dme-mir-2b-2 // 2L:19570182-19570264 (-)
20500202	1.31879	0.07604	A	1.22214	-0.03376	A	1.24363	-0.00861	A	1.19152	-0.07037	A	1.26353	0.01428	A	1.25852	0.00856	A	1.26152	1.23786	1.01912	0.0273188	0.563264	AA	0	miRNA	miRBase	Drosophila melanogaster	dme-miR-2a-2-5p	2L:19569534-19569554 (-)	21	CCUCAUCAAGUGGUUGUGAUA	MIMAT0020781_st	MIMAT0020781	FBtr0081267 // sense // intron // 1 /// FBtr0081268 // sense // intron // 2 /// FBtr0081269 // sense // intron // 2 /// FBtr0081270 // sense // intron // 1 /// FBtr0100597 // sense // intron // 2	dme-mir-2a-1 // 2L:19569897-19569972 (-) /// dme-mir-2a-2 // 2L:19569490-19569561 (-) /// dme-mir-2b-2 // 2L:19570182-19570264 (-)
20500203	0.8951	-0.35837	A	1.5557	0.43907	A	1.33805	0.22164	A	1.06653	-0.10557	A	0.98148	-0.22546	A	1.22847	0.09837	A	1.26295	1.09216	1.15638	0.209613	0.524527	AA	0	miRNA	miRBase	Drosophila melanogaster	dme-miR-2b-1-5p	2L:8258662-8258684 (-)	23	GUCUUCAAAGUGGCAGUGACAUG	MIMAT0020782_st	MIMAT0020782	---	---
20500204	1.23241	0.11062	A	1.05048	-0.11981	A	1.44032	0.33552	A	0.91239	-0.32314	A	0.94668	-0.26992	A	1.24214	0.12196	A	1.24107	1.03374	1.20057	0.263716	0.239027	AA	0	miRNA	miRBase	Drosophila melanogaster	dme-miR-2b-3p	2L:8258623-8258645 (-) /// 2L:19570189-19570211 (-)	23	UAUCACAGCCAGCUUUGAGGAGC	MIMAT0000107_st	MIMAT0000107	FBtr0081267 // sense // intron // 1 /// FBtr0081268 // sense // intron // 2 /// FBtr0081269 // sense // intron // 2 /// FBtr0081270 // sense // intron // 1 /// FBtr0100597 // sense // intron // 2	dme-mir-2a-1 // 2L:19569897-19569972 (-) /// dme-mir-2a-2 // 2L:19569490-19569561 (-) /// dme-mir-2b-2 // 2L:19570182-19570264 (-)
20500205	1.14829	0.03145	A	1.09876	-0.03215	A	1.23358	0.13481	A	1.04008	-0.11135	A	1.09876	-0.03215	A	1.33841	0.25249	A	1.16021	1.15908	1.00097	0.00140167	0.948014	AA	0	miRNA	miRBase	Drosophila melanogaster	dme-miR-2b-2-5p	2L:19570234-19570256 (-)	23	UUCUUCAAAGUGGUUGUGAAAUG	MIMAT0020783_st	MIMAT0020783	FBtr0081267 // sense // intron // 1 /// FBtr0081268 // sense // intron // 2 /// FBtr0081269 // sense // intron // 2 /// FBtr0081270 // sense // intron // 1 /// FBtr0100597 // sense // intron // 2	dme-mir-2a-1 // 2L:19569897-19569972 (-) /// dme-mir-2a-2 // 2L:19569490-19569561 (-) /// dme-mir-2b-2 // 2L:19570182-19570264 (-)
20500206	1.05374	-0.14898	A	1.15011	-0.02273	A	1.18664	0.02238	A	1.33034	0.18729	A	0.95205	-0.29539	A	1.18664	0.02238	A	1.13016	1.15634	0.97736	-0.0330385	0.894858	AA	0	miRNA	miRBase	Drosophila melanogaster	dme-miR-3-5p	2R:15549140-15549161 (-)	22	GGAUGCAUCUUGUGCAGUUAUG	MIMAT0020784_st	MIMAT0020784	---	dme-mir-3 // 2R:15549100-15549168 (-) /// dme-mir-4 // 2R:15548794-15548874 (-) /// dme-mir-5 // 2R:15548663-15548731 (-) /// dme-mir-6-1 // 2R:15548508-15548589 (-) /// dme-mir-6-2 // 2R:15548374-15548447 (-) /// dme-mir-6-3 // 2R:15548221-15548300 (-) /// dme-mir-286 // 2R:15548927-15549026 (-) /// dme-mir-309 // 2R:15549211-15549279 (-)
20500207	1.2281	-0.01424	A	1.48358	0.25842	A	0.91239	-0.44294	A	1.42897	0.2043	A	1.11628	-0.15197	A	1.25246	0.0141	A	1.20802	1.2659	0.954278	-0.0675189	0.718677	AA	0	miRNA	miRBase	Drosophila melanogaster	dme-miR-3-3p	2R:15549105-15549126 (-)	22	UCACUGGGCAAAGUGUGUCUCA	MIMAT0000108_st	MIMAT0000108	---	dme-mir-3 // 2R:15549100-15549168 (-) /// dme-mir-4 // 2R:15548794-15548874 (-) /// dme-mir-5 // 2R:15548663-15548731 (-) /// dme-mir-6-1 // 2R:15548508-15548589 (-) /// dme-mir-6-2 // 2R:15548374-15548447 (-) /// dme-mir-6-3 // 2R:15548221-15548300 (-) /// dme-mir-286 // 2R:15548927-15549026 (-) /// dme-mir-309 // 2R:15549211-15549279 (-)
20500208	1.26757	0.07667	A	1.13637	-0.08097	A	1.26757	0.07667	A	0.98699	-0.2843	A	1.35066	0.16826	A	1.11807	-0.1044	A	1.22384	1.15191	1.06244	0.0873872	0.528721	AA	0	miRNA	miRBase	Drosophila melanogaster	dme-miR-4-5p	2R:15548838-15548861 (-)	24	CUUUGGUCGUCCAGCCUUAGGUGA	MIMAT0020785_st	MIMAT0020785	---	dme-mir-3 // 2R:15549100-15549168 (-) /// dme-mir-4 // 2R:15548794-15548874 (-) /// dme-mir-5 // 2R:15548663-15548731 (-) /// dme-mir-6-1 // 2R:15548508-15548589 (-) /// dme-mir-6-2 // 2R:15548374-15548447 (-) /// dme-mir-6-3 // 2R:15548221-15548300 (-) /// dme-mir-286 // 2R:15548927-15549026 (-) /// dme-mir-309 // 2R:15549211-15549279 (-)
20500209	1.52009	0.21923	A	1.38313	0.08301	A	1.45945	0.1605	A	1.22847	-0.08807	A	1.05048	-0.31388	A	1.22847	-0.08807	A	1.45422	1.16914	1.24384	0.314801	0.0201696	AA	0	miRNA	miRBase	Drosophila melanogaster	dme-miR-4-3p	2R:15548806-15548826 (-)	21	AUAAAGCUAGACAACCAUUGA	MIMAT0000109_st	MIMAT0000109	---	dme-mir-3 // 2R:15549100-15549168 (-) /// dme-mir-4 // 2R:15548794-15548874 (-) /// dme-mir-5 // 2R:15548663-15548731 (-) /// dme-mir-6-1 // 2R:15548508-15548589 (-) /// dme-mir-6-2 // 2R:15548374-15548447 (-) /// dme-mir-6-3 // 2R:15548221-15548300 (-) /// dme-mir-286 // 2R:15548927-15549026 (-) /// dme-mir-309 // 2R:15549211-15549279 (-)
20500210	1.23871	0	A	1.23871	0	A	1.23871	0	A	1.23871	0	A	1.08788	-0.18732	A	1.23871	0	A	1.23871	1.18843	1.0423	0.0597775	0.373901	AA	0	miRNA	miRBase	Drosophila melanogaster	dme-miR-5-5p	2R:15548705-15548727 (-)	23	AAAGGAACGAUCGUUGUGAUAUG	MIMAT0000110_st	MIMAT0000110	---	dme-mir-3 // 2R:15549100-15549168 (-) /// dme-mir-4 // 2R:15548794-15548874 (-) /// dme-mir-5 // 2R:15548663-15548731 (-) /// dme-mir-6-1 // 2R:15548508-15548589 (-) /// dme-mir-6-2 // 2R:15548374-15548447 (-) /// dme-mir-6-3 // 2R:15548221-15548300 (-) /// dme-mir-286 // 2R:15548927-15549026 (-) /// dme-mir-309 // 2R:15549211-15549279 (-)
20500211	0.9395	-0.09285	A	1.0644	0.08723	A	0.91239	-0.13508	A	1.1536	0.20334	A	0.93626	-0.09783	A	1.31842	0.396	A	0.972097	1.13609	0.855649	-0.22491	0.249538	AA	0	miRNA	miRBase	Drosophila melanogaster	dme-miR-5-3p	2R:15548667-15548689 (-)	23	UAUCACAGUGAUUUUCCUUUAUA	MIMAT0020786_st	MIMAT0020786	---	dme-mir-3 // 2R:15549100-15549168 (-) /// dme-mir-4 // 2R:15548794-15548874 (-) /// dme-mir-5 // 2R:15548663-15548731 (-) /// dme-mir-6-1 // 2R:15548508-15548589 (-) /// dme-mir-6-2 // 2R:15548374-15548447 (-) /// dme-mir-6-3 // 2R:15548221-15548300 (-) /// dme-mir-286 // 2R:15548927-15549026 (-) /// dme-mir-309 // 2R:15549211-15549279 (-)
20500212	1.25534	-0.01048	A	1.11417	-0.18258	A	1.27364	0.0104	A	1.47797	0.22506	A	1.22847	-0.0417	A	1.46641	0.21373	A	1.21438	1.39095	0.87306	-0.195847	0.143542	AA	0	miRNA	miRBase	Drosophila melanogaster	dme-miR-6-1-5p	2R:15548558-15548579 (-)	22	AGGGAAUAGUUGCUGUGCUGUA	MIMAT0020787_st	MIMAT0020787	---	dme-mir-3 // 2R:15549100-15549168 (-) /// dme-mir-4 // 2R:15548794-15548874 (-) /// dme-mir-5 // 2R:15548663-15548731 (-) /// dme-mir-6-1 // 2R:15548508-15548589 (-) /// dme-mir-6-2 // 2R:15548374-15548447 (-) /// dme-mir-6-3 // 2R:15548221-15548300 (-) /// dme-mir-286 // 2R:15548927-15549026 (-) /// dme-mir-309 // 2R:15549211-15549279 (-)
20500213	1.22847	0.10849	A	1.22847	0.10849	A	1.05048	-0.11732	A	1.51607	0.41197	P	1.05048	-0.11732	A	1.05048	-0.11732	A	1.16914	1.20568	0.969696	-0.0443954	0.899143	PA	0	miRNA	miRBase	Drosophila melanogaster	dme-miR-6-3p	2R:15548227-15548248 (-) /// 2R:15548379-15548400 (-) /// 2R:15548517-15548538 (-)	22	UAUCACAGUGGCUGUUCUUUUU	MIMAT0000111_st	MIMAT0000111	---	dme-mir-3 // 2R:15549100-15549168 (-) /// dme-mir-4 // 2R:15548794-15548874 (-) /// dme-mir-5 // 2R:15548663-15548731 (-) /// dme-mir-6-1 // 2R:15548508-15548589 (-) /// dme-mir-6-2 // 2R:15548374-15548447 (-) /// dme-mir-6-3 // 2R:15548221-15548300 (-) /// dme-mir-286 // 2R:15548927-15549026 (-) /// dme-mir-309 // 2R:15549211-15549279 (-) /// dme-mir-3 // 2R:15549100-15549168 (-) /// dme-mir-4 /…
20500214	1.17391	-0.04583	A	1.22847	0.01971	A	1.36827	0.17521	A	1.27749	0.07616	A	1.19512	-0.01999	A	1.06062	-0.19223	A	1.25688	1.17774	1.0672	0.0938256	0.405312	AA	0	miRNA	miRBase	Drosophila melanogaster	dme-miR-6-2-5p	2R:15548418-15548440 (-)	23	AGGGAACUUCUGCUGCUGAUAUA	MIMAT0020788_st	MIMAT0020788	---	dme-mir-3 // 2R:15549100-15549168 (-) /// dme-mir-4 // 2R:15548794-15548874 (-) /// dme-mir-5 // 2R:15548663-15548731 (-) /// dme-mir-6-1 // 2R:15548508-15548589 (-) /// dme-mir-6-2 // 2R:15548374-15548447 (-) /// dme-mir-6-3 // 2R:15548221-15548300 (-) /// dme-mir-286 // 2R:15548927-15549026 (-) /// dme-mir-309 // 2R:15549211-15549279 (-)
20500215	1.23385	-0.09693	A	1.16333	-0.18183	A	1.46066	0.14652	A	1.22847	-0.10324	A	1.40534	0.09082	A	1.46066	0.14652	A	1.28595	1.36482	0.942207	-0.0858834	0.514064	AA	0	miRNA	miRBase	Drosophila melanogaster	dme-miR-6-3-5p	2R:15548270-15548292 (-)	23	AGGGAACGGUUGCUGAUGAUGUA	MIMAT0020789_st	MIMAT0020789	---	dme-mir-3 // 2R:15549100-15549168 (-) /// dme-mir-4 // 2R:15548794-15548874 (-) /// dme-mir-5 // 2R:15548663-15548731 (-) /// dme-mir-6-1 // 2R:15548508-15548589 (-) /// dme-mir-6-2 // 2R:15548374-15548447 (-) /// dme-mir-6-3 // 2R:15548221-15548300 (-) /// dme-mir-286 // 2R:15548927-15549026 (-) /// dme-mir-309 // 2R:15549211-15549279 (-)
20500216	1.17643	-0.24977	A	1.41554	0.01717	P	1.39879	0	A	1.57302	0.16935	A	1.22847	-0.18732	A	1.39879	0	A	1.33025	1.40009	0.950118	-0.073822	0.622596	PA	0	miRNA	miRBase	Drosophila melanogaster	dme-miR-7-5p	2R:16493586-16493608 (+)	23	UGGAAGACUAGUGAUUUUGUUGU	MIMAT0000112_st	MIMAT0000112	FBtr0086219 // sense // intron // 8 /// FBtr0086220 // sense // intron // 8 /// FBtr0086221 // sense // intron // 9 /// FBtr0301760 // sense // intron // 8	---
20500217	1.2236	0	A	1.23335	0.01145	A	1.39325	0.18732	A	1.21393	-0.01145	A	1.2236	0	A	1.2236	0	A	1.2834	1.22038	1.05164	0.0726444	0.312913	AA	0	miRNA	miRBase	Drosophila melanogaster	dme-miR-7-3p	2R:16493626-16493647 (+)	22	CAAUAAAUCCCUUGUCUUCUUA	MIMAT0020790_st	MIMAT0020790	FBtr0086219 // sense // intron // 8 /// FBtr0086220 // sense // intron // 8 /// FBtr0086221 // sense // intron // 9 /// FBtr0301760 // sense // intron // 8	---
20500218	4.91243	1.45314	P	1.08169	-0.73002	A	2.08646	0.21776	P	1.1408	-0.65325	A	3.11765	0.79716	P	1.50184	-0.25657	A	2.69353	1.9201	1.40281	0.488317	0.67043	PA	0	miRNA	miRBase	Drosophila melanogaster	dme-miR-8-5p	2R:12718952-12718973 (+)	22	CAUCUUACCGGGCAGCAUUAGA	MIMAT0020791_st	MIMAT0020791	FBtr0310102 // sense // exon // 1 /// FBtr0310103 // sense // exon // 1	---
20500219	1.05048	-0.1129	A	1.136	0	A	0.9906	-0.19758	A	1.46066	0.36267	A	1.22847	0.1129	A	1.136	0	A	1.05903	1.27504	0.830581	-0.267807	0.0972203	AA	0	miRNA	miRBase	Drosophila melanogaster	dme-miR-8-3p	2R:12718989-12719011 (+)	23	UAAUACUGUCAGGUAAAGAUGUC	MIMAT0000113_st	MIMAT0000113	FBtr0310102 // sense // exon // 1 /// FBtr0310103 // sense // exon // 1	---
20500220	1.2033	0.02587	A	1.7821	0.59246	A	1.16052	-0.02635	A	1.04529	-0.17722	A	1.07246	-0.1402	A	1.2033	0.02587	A	1.38197	1.10702	1.24838	0.320053	0.229268	AA	0	miRNA	miRBase	Drosophila melanogaster	dme-miR-9a-5p	3L:19558240-19558262 (+)	23	UCUUUGGUUAUCUAGCUGUAUGA	MIMAT0000114_st	MIMAT0000114	---	---
20500221	0.93532	-0.27793	A	0.99923	-0.18259	A	1.15046	0.02074	A	1.11762	-0.02104	A	1.15523	0.02671	A	1.28697	0.18251	A	1.02834	1.18661	0.86662	-0.206529	0.123099	AA	0	miRNA	miRBase	Drosophila melanogaster	dme-miR-9a-3p	3L:19558279-19558300 (+)	22	UAAAGCUAGCUUACCGAAGUUA	MIMAT0020792_st	MIMAT0020792	---	---
20500222	1.25188	-0.08586	P	1.49751	0.1726	A	0.82927	-0.68006	A	1.40542	0.08104	A	1.23137	-0.10971	P	1.47394	0.14971	P	1.19289	1.37024	0.870566	-0.199975	0.418204	PA	0	miRNA	miRBase	Drosophila melanogaster	dme-miR-10-5p	3R:2635275-2635296 (-)	22	ACCCUGUAGAUCCGAAUUUGUU	MIMAT0000115_st	MIMAT0000115	---	---
20500223	1.41411	0.37221	A	1.01004	-0.11327	A	1.16291	0.09005	A	1.09254	0	A	1.09254	0	A	1.01004	-0.11327	A	1.19569	1.06504	1.12267	0.166932	0.35	AA	0	miRNA	miRBase	Drosophila melanogaster	dme-miR-10-3p	3R:2635234-2635256 (-)	23	CAAAUUCGGUUCUAGAGAGGUUU	MIMAT0012531_st	MIMAT0012531	---	---
20500224	1.31576	0.04867	A	1.20666	-0.07621	A	1.46066	0.1994	A	1.31576	0.04867	A	1.20666	-0.07621	A	1.22847	-0.05037	A	1.32769	1.2503	1.0619	0.0866515	0.399137	AA	0	miRNA	miRBase	Drosophila melanogaster	dme-miR-11-5p	3R:17448264-17448285 (-)	22	CAAGAACUUUCUCUGUGACCCG	MIMAT0020793_st	MIMAT0020793	FBtr0084117 // sense // intron // 7 /// FBtr0084118 // sense // intron // 5 /// FBtr0084119 // sense // intron // 5	dme-mir-11 // 3R:17448219-17448293 (-) /// dme-mir-998 // 3R:17447601-17447743 (-)
20500225	1.46756	0.19614	A	1.11643	-0.19839	A	1.23608	-0.05151	A	1.45723	0.18595	A	1.20648	-0.08647	A	1.32594	0.04974	A	1.27336	1.32988	0.957495	-0.0626631	0.652864	AA	0	miRNA	miRBase	Drosophila melanogaster	dme-miR-11-3p	3R:17448226-17448246 (-)	21	CAUCACAGUCUGAGUUCUUGC	MIMAT0000116_st	MIMAT0000116	FBtr0084117 // sense // intron // 7 /// FBtr0084118 // sense // intron // 5 /// FBtr0084119 // sense // intron // 5	dme-mir-11 // 3R:17448219-17448293 (-) /// dme-mir-998 // 3R:17447601-17447743 (-)
20500226	1.18363	0	A	1.18363	0	A	0.92595	-0.3542	A	1.02804	-0.20333	A	1.18363	0	A	1.35735	0.19758	A	1.09774	1.18967	0.922721	-0.116033	0.521076	AA	0	miRNA	miRBase	Drosophila melanogaster	dme-miR-12-5p	X:15403512-15403534 (+)	23	UGAGUAUUACAUCAGGUACUGGU	MIMAT0000117_st	MIMAT0000117	FBtr0074042 // sense // intron // 5 /// FBtr0074043 // sense // intron // 4	dme-mir-12 // X:15403506-15403579 (+) /// dme-mir-283 // X:15401989-15402088 (+) /// dme-mir-304 // X:15402992-15403079 (+)
20500227	1.136	0.02559	A	1.136	0.02559	A	1.03061	-0.11486	A	1.09604	-0.02606	A	0.97141	-0.20021	A	1.136	0.02559	A	1.10087	1.06782	1.03095	0.0439801	0.610667	AA	0	miRNA	miRBase	Drosophila melanogaster	dme-miR-12-3p	X:15403554-15403575 (+)	22	CAGUACUUAUGUCAUACUACGC	MIMAT0020794_st	MIMAT0020794	FBtr0074042 // sense // intron // 5 /// FBtr0074043 // sense // intron // 4	dme-mir-12 // X:15403506-15403579 (+) /// dme-mir-283 // X:15401989-15402088 (+) /// dme-mir-304 // X:15402992-15403079 (+)
20500228	1.35967	0.27451	A	1.19769	0.0915	A	0.9639	-0.22179	A	1.26163	0.16653	A	1.05048	-0.0977	A	1.02417	-0.1343	A	1.17375	1.11209	1.05544	0.0778514	0.707093	AA	0	miRNA	miRBase	Drosophila melanogaster	dme-miR-13a-5p	3R:11243310-11243331 (-)	22	CUCCUCAAAGGGUUGUGAAAUG	MIMAT0020795_st	MIMAT0020795	---	dme-mir-13a // 3R:11243264-11243338 (-) /// dme-mir-13b-1 // 3R:11243130-11243197 (-) /// dme-mir-2c // 3R:11243466-11243567 (-)
20500229	1.34398	0.23886	A	1.0478	-0.12029	A	1.22847	0.10921	A	1.13891	0	A	1.07521	-0.08304	A	1.13891	0	A	1.20675	1.11768	1.0797	0.110624	0.39407	AA	0	miRNA	miRBase	Drosophila melanogaster	dme-miR-13a-3p	3R:11243270-11243291 (-)	22	UAUCACAGCCAUUUUGAUGAGU	MIMAT0000118_st	MIMAT0000118	---	dme-mir-13a // 3R:11243264-11243338 (-) /// dme-mir-13b-1 // 3R:11243130-11243197 (-) /// dme-mir-2c // 3R:11243466-11243567 (-)
20500230	1.16916	0.06093	A	1.05048	-0.09349	A	1.22847	0.13232	A	1.05048	-0.09349	A	1.07246	-0.06362	A	1.2033	0.10245	A	1.14937	1.10875	1.03664	0.0519135	0.599171	AA	0	miRNA	miRBase	Drosophila melanogaster	dme-miR-13b-1-5p	3R:11243168-11243192 (-)	25	UCGUUAAAAUGUUUGUGAACUUAUG	MIMAT0020796_st	MIMAT0020796	---	dme-mir-13a // 3R:11243264-11243338 (-) /// dme-mir-13b-1 // 3R:11243130-11243197 (-) /// dme-mir-2c // 3R:11243466-11243567 (-)
20500231	1.136	-0.1129	A	1.22847	0	A	1.24049	0.01405	A	0.98666	-0.31623	A	1.22847	0	A	1.46066	0.24977	A	1.20165	1.22526	0.980731	-0.0280711	0.952022	AA	0	miRNA	miRBase	Drosophila melanogaster	dme-miR-13b-3p	3R:11243134-11243155 (-) /// X:8985308-8985329 (+)	22	UAUCACAGCCAUUUUGACGAGU	MIMAT0000119_st	MIMAT0000119	FBtr0071289 // sense // intron // 2	dme-mir-13a // 3R:11243264-11243338 (-) /// dme-mir-13b-1 // 3R:11243130-11243197 (-) /// dme-mir-2c // 3R:11243466-11243567 (-)
20500232	1.0988	0.01126	A	1.22847	0.17218	A	1.08172	-0.01135	A	1.08172	-0.01135	A	1.05048	-0.05362	A	1.28497	0.23706	A	1.13633	1.13906	0.997606	-0.00345765	0.999999	AA	0	miRNA	miRBase	Drosophila melanogaster	dme-miR-13b-2-5p	X:8985270-8985293 (+)	24	GCGUCAAAAUGACUGUGAGCUAUG	MIMAT0020797_st	MIMAT0020797	FBtr0071289 // sense // intron // 2	---
20500233	26.876	1.60752	P	1.74024	-2.34144	A	43.2625	2.29432	P	4.16109	-1.08376	P	13.4782	0.61184	P	2.19345	-2.00752	A	23.9596	6.61093	3.62424	1.85768	0.456548	PA	0	miRNA	miRBase	Drosophila melanogaster	dme-miR-14-5p	2R:5441270-5441291 (+)	22	GGGAGCGAGACGGGGACUCACU	MIMAT0020798_st	MIMAT0020798	FBtr0310104 // sense // exon // 1 /// FBtr0310105 // sense // exon // 1	---
20500234	1.18133	0	A	1.39863	0.24361	A	1.05048	-0.16935	A	1.18133	0	A	1.18133	0	A	1.18133	0	A	1.21015	1.18133	1.02439	0.0347699	0.846467	AA	0	miRNA	miRBase	Drosophila melanogaster	dme-miR-14-3p	2R:5441307-5441328 (+)	22	UCAGUCUUUUUCUCUCUCCUAU	MIMAT0000120_st	MIMAT0000120	FBtr0310104 // sense // exon // 1 /// FBtr0310105 // sense // exon // 1	---
20500235	1.53981	0.12838	A	1.20484	-0.22553	A	1.2776	-0.14093	A	1.23713	-0.18738	A	1.70209	0.27293	P	1.67529	0.25004	A	1.34075	1.53817	0.871653	-0.198175	0.357114	PA	0	miRNA	miRBase	Mus musculus	mmu-let-7g-5p	chr9:106178846-106178867 (+)	22	UGAGGUAGUAGUUUGUACAGUU	MIMAT0000121_st	MIMAT0000121	ENSMUST00000020490 // sense // intron // 2	---
20500236	1.28355	0.07135	A	1.40093	0.1976	A	1.10516	-0.14453	A	1.10516	-0.14453	A	1.42981	0.22703	A	1.15968	-0.07506	A	1.26321	1.23155	1.02571	0.0366231	0.809733	AA	0	miRNA	miRBase	Mus musculus	mmu-let-7g-3p	chr9:106178902-106178923 (+)	22	ACUGUACAGGCCACUGCCUUGC	MIMAT0004519_st	MIMAT0004519	ENSMUST00000020490 // sense // intron // 2	---
20500237	2.19936	-0.12392	P	1.78942	-0.42151	A	2.52392	0.07466	P	2.75407	0.20056	P	5.48469	1.1944	P	2.26934	-0.07874	P	2.1709	3.5027	0.619779	-0.690174	0.222098	PA	0	miRNA	miRBase	Mus musculus	mmu-let-7i-5p	chr10:122985698-122985719 (-)	22	UGAGGUAGUAGUUUGUGCUGUU	MIMAT0000122_st	MIMAT0000122	---	---
20500238	1.05048	0.02312	A	1.22847	0.24892	A	0.93088	-0.15127	A	1.01709	-0.02349	A	0.93626	-0.14295	A	1.49026	0.52763	A	1.06994	1.14787	0.932112	-0.101425	0.752059	AA	0	miRNA	miRBase	Mus musculus	mmu-let-7i-3p	chr10:122985642-122985663 (-)	22	CUGCGCAAGCUACUGCCUUGCU	MIMAT0004520_st	MIMAT0004520	---	---
20500239	1.35967	-0.08041	A	1.45191	0.01428	A	1.42905	-0.00861	A	1.42905	-0.00861	A	1.45191	0.01428	A	1.44616	0.00856	A	1.41354	1.44237	0.980012	-0.0291285	0.36933	AA	0	miRNA	miRBase	Mus musculus	mmu-miR-1a-1-5p	chr2:180389057-180389079 (+)	23	ACAUACUUCUUUAUAUGCCCAUA	MIMAT0016979_st	MIMAT0016979	---	mmu-mir-1a-1 // chr2:180389048-180389124 (+) /// mmu-mir-133a-2 // chr2:180398379-180398482 (+)
20500240	1.18524	-0.10336	A	1.27327	0	A	1.27327	0	A	1.27327	0	A	1.27327	0	A	1.33847	0.07204	A	1.24393	1.295	0.960559	-0.0580544	0.236271	AA	0	miRNA	miRBase	Mus musculus	mmu-miR-1a-3p	chr18:10785485-10785506 (-) /// chr2:180389096-180389117 (+)	22	UGGAAUGUAAAGAAGUAUGUAU	MIMAT0000123_st	MIMAT0000123	ENSMUST00000052838 // antisense // intron // 12 /// ENSMUST00000117012 // antisense // exon // 1 /// ENSMUST00000124288 // antisense // intron // 5 /// ENSMUST00000165555 // antisense // intron // 13 /// ENSMUST00000179771 // sense // intron // 1 /// OTTMUST00000070815 // antisense // intron // 12 /// OTTMUST00000070818 // antisense // intron // 5 /// OTTMUST00000111849 // sense // intron // 1	mmu-mir-1a-1 // chr2:180389048-180389124 (+) /// mmu-mir-133a-2 // chr2:180398379-180398482 (+) /// mmu-mir-133a-1 // chr18:10782909-10782976 (-) /// mmu-mir-1a-2 // chr18:10785481-10785552 (-) /// mmu-mir-1b // chr18:10785446-10785567 (+)
20500241	1.85546	0.19701	P	1.41422	-0.19476	A	1.32731	-0.28626	A	1.45565	-0.1531	A	1.93667	0.25882	P	1.78159	0.1384	P	1.53233	1.72464	0.888494	-0.170565	0.4114	PA	0	miRNA	miRBase	Mus musculus	mmu-miR-15b-5p	chr3:69009775-69009796 (+)	22	UAGCAGCACAUCAUGGUUUACA	MIMAT0000124_st	MIMAT0000124	ENSMUST00000042901 // sense // intron // 5 /// ENSMUST00000083646 // sense // exon // 1 /// ENSMUST00000107803 // sense // intron // 5 /// ENSMUST00000136502 // sense // intron // 5 /// ENSMUST00000148385 // sense // intron // 5 /// OTTMUST00000060029 // sense // intron // 5 /// OTTMUST00000060030 // sense // intron // 5 /// OTTMUST00000060031 // sense // intron // 5 /// OTTMUST00000060032 // sen…	mmu-mir-15b // chr3:69009772-69009835 (+) /// mmu-mir-16-2 // chr3:69009902-69009996 (+)
20500242	1.16609	0.01541	A	1.10668	-0.06003	A	1.33349	0.20894	A	1.14131	-0.01557	A	1.10668	-0.06003	A	1.16609	0.01541	A	1.20209	1.13803	1.05629	0.0790065	0.418424	AA	0	miRNA	miRBase	Mus musculus	mmu-miR-15b-3p	chr3:69009813-69009834 (+)	22	CGAAUCAUUAUUUGCUGCUCUA	MIMAT0004521_st	MIMAT0004521	ENSMUST00000042901 // sense // intron // 5 /// ENSMUST00000083646 // sense // exon // 1 /// ENSMUST00000107803 // sense // intron // 5 /// ENSMUST00000136502 // sense // intron // 5 /// ENSMUST00000148385 // sense // intron // 5 /// OTTMUST00000060029 // sense // intron // 5 /// OTTMUST00000060030 // sense // intron // 5 /// OTTMUST00000060031 // sense // intron // 5 /// OTTMUST00000060032 // sen…	mmu-mir-15b // chr3:69009772-69009835 (+) /// mmu-mir-16-2 // chr3:69009902-69009996 (+)
20500243	1.23394	0.00098	A	0.92718	-0.41138	A	1.23227	-0.00098	A	1.3219	0.10031	A	1.92877	0.64539	P	1.23227	-0.00098	A	1.13113	1.49431	0.756956	-0.401718	0.188077	PA	0	miRNA	miRBase	Mus musculus	mmu-miR-23b-5p	chr13:63300492-63300512 (+)	21	GGGUUCCUGGCAUGCUGAUUU	MIMAT0016980_st	MIMAT0016980	ENSMUST00000021911 // sense // intron // 15 /// ENSMUST00000083665 // sense // exon // 1 /// ENSMUST00000159152 // sense // intron // 3 /// OTTMUST00000076332 // sense // intron // 3	mmu-mir-23b // chr13:63300484-63300557 (+) /// mmu-mir-27b // chr13:63300712-63300784 (+) /// mmu-mir-24-1 // chr13:63301208-63301275 (+) /// mmu-mir-3074-1 // chr13:63301199-63301283 (-)
20500244	16.093	3.44468	P	1.29806	-0.18733	A	1.47804	0	P	1.41001	-0.06797	A	25.1719	4.09006	P	1.47804	0	A	6.28971	9.35333	0.672456	-0.572487	0.894936	PA	0	miRNA	miRBase	Mus musculus	mmu-miR-23b-3p	chr13:63300529-63300549 (+)	21	AUCACAUUGCCAGGGAUUACC	MIMAT0000125_st	MIMAT0000125	ENSMUST00000021911 // sense // intron // 15 /// ENSMUST00000083665 // sense // exon // 1 /// ENSMUST00000159152 // sense // intron // 3 /// OTTMUST00000076332 // sense // intron // 3	mmu-mir-23b // chr13:63300484-63300557 (+) /// mmu-mir-27b // chr13:63300712-63300784 (+) /// mmu-mir-24-1 // chr13:63301208-63301275 (+) /// mmu-mir-3074-1 // chr13:63301199-63301283 (-)
20500245	1.17627	-0.09726	A	1.22847	-0.03462	A	1.28814	0.03381	A	1.28814	0.03381	A	1.04837	-0.26333	A	1.39911	0.15303	A	1.23096	1.24521	0.988559	-0.0166013	0.958349	AA	0	miRNA	miRBase	Mus musculus	mmu-miR-27b-5p	chr13:63300718-63300739 (+)	22	AGAGCUUAGCUGAUUGGUGAAC	MIMAT0004522_st	MIMAT0004522	ENSMUST00000021911 // sense // intron // 15 /// ENSMUST00000083541 // sense // exon // 1 /// ENSMUST00000159152 // sense // intron // 3 /// OTTMUST00000076332 // sense // intron // 3	mmu-mir-23b // chr13:63300484-63300557 (+) /// mmu-mir-27b // chr13:63300712-63300784 (+) /// mmu-mir-24-1 // chr13:63301208-63301275 (+) /// mmu-mir-3074-1 // chr13:63301199-63301283 (-)
20500246	1.76461	0.22467	P	1.25842	-0.26306	A	1.30236	-0.21354	A	1.49628	-0.0133	A	2.21767	0.55437	P	1.52399	0.01318	A	1.4418	1.74598	0.825781	-0.276169	0.327861	PA	0	miRNA	miRBase	Mus musculus	mmu-miR-27b-3p	chr13:63300760-63300780 (+)	21	UUCACAGUGGCUAAGUUCUGC	MIMAT0000126_st	MIMAT0000126	ENSMUST00000021911 // sense // intron // 15 /// ENSMUST00000083541 // sense // exon // 1 /// ENSMUST00000159152 // sense // intron // 3 /// OTTMUST00000076332 // sense // intron // 3	mmu-mir-23b // chr13:63300484-63300557 (+) /// mmu-mir-27b // chr13:63300712-63300784 (+) /// mmu-mir-24-1 // chr13:63301208-63301275 (+) /// mmu-mir-3074-1 // chr13:63301199-63301283 (-)
20500247	1.136	0	A	1.136	0	A	1.22285	0.10629	A	1.136	0	A	1.136	0	A	1.136	0	A	1.16495	1.136	1.02548	0.0363052	0.373901	AA	0	miRNA	miRBase	Mus musculus	mmu-miR-29b-1-5p	chr6:31063067-31063088 (-)	22	GCUGGUUUCAUAUGGUGGUUUA	MIMAT0004523_st	MIMAT0004523	ENSMUST00000083670 // sense // exon // 1 /// ENSMUST00000183056 // sense // exon // 1 /// OTTMUST00000114092 // sense // exon // 1	mmu-mir-29b-1 // chr6:31063023-31063093 (-) /// mmu-mir-29a // chr6:31062660-31062747 (-)
20500248	1.19673	0.00706	A	1.05048	-0.18098	A	1.18505	-0.00709	A	1.32405	0.15292	A	1.01412	-0.23182	A	1.21454	0.02837	A	1.14409	1.18424	0.966096	-0.0497611	0.75194	AA	0	miRNA	miRBase	Mus musculus	mmu-miR-29b-3p	chr1:195037091-195037113 (+) /// chr6:31063025-31063047 (-)	23	UAGCACCAUUUGAAAUCAGUGUU	MIMAT0000127_st	MIMAT0000127	ENSMUST00000083670 // sense // exon // 1 /// ENSMUST00000183056 // sense // exon // 1 /// OTTMUST00000114092 // sense // exon // 1 /// ENSMUST00000181273 // sense // exon // 8	mmu-mir-29b-1 // chr6:31063023-31063093 (-) /// mmu-mir-29a // chr6:31062660-31062747 (-) /// mmu-mir-29c // chr1:195037547-195037634 (+) /// mmu-mir-29b-2 // chr1:195037040-195037120 (+)
20500249	2.05537	0.57295	P	1.23825	-0.15814	A	1.38881	0.0074	A	1.18759	-0.21841	A	1.89268	0.45398	P	1.3746	-0.00744	A	1.56081	1.48496	1.05108	0.0718741	0.838413	PA	0	miRNA	miRBase	Mus musculus	mmu-miR-30a-5p	chr1:23272274-23272295 (+)	22	UGUAAACAUCCUCGACUGGAAG	MIMAT0000128_st	MIMAT0000128	---	---
20500250	1.32046	0.1228	A	1.36289	0.16843	A	1.07189	-0.17808	A	1.21189	-0.00098	A	1.02019	-0.24941	A	1.21354	0.00098	A	1.25175	1.14854	1.08986	0.124142	0.42706	AA	0	miRNA	miRBase	Mus musculus	mmu-miR-30a-3p	chr1:23272315-23272336 (+)	22	CUUUCAGUCGGAUGUUUGCAGC	MIMAT0000129_st	MIMAT0000129	---	---
20500251	1.66796	0.21718	P	1.47291	0.03776	A	1.31087	-0.13038	A	1.42347	-0.01149	A	1.44624	0.0114	A	1.25951	-0.18804	A	1.48391	1.37641	1.07811	0.1085	0.428735	PA	0	miRNA	miRBase	Mus musculus	mmu-miR-30b-5p	chr15:68337469-68337490 (-)	22	UGUAAACAUCCUACACUCAGCU	MIMAT0000130_st	MIMAT0000130	ENSMUST00000181514 // sense // exon // 1 /// OTTMUST00000112737 // sense // exon // 1	mmu-mir-30b // chr15:68337415-68337510 (-) /// mmu-mir-30d // chr15:68341208-68341289 (-)
20500252	1.25731	0.02447	A	1.22847	-0.00901	A	1.24386	0.00896	A	1.05048	-0.23482	A	1.2726	0.04191	A	1.22847	-0.00901	A	1.24321	1.18385	1.05014	0.0705876	0.427807	AA	0	miRNA	miRBase	Mus musculus	mmu-miR-30b-3p	chr15:68337431-68337452 (-)	22	CUGGGAUGUGGAUGUUUACGUC	MIMAT0004524_st	MIMAT0004524	ENSMUST00000181514 // sense // exon // 1 /// OTTMUST00000112737 // sense // exon // 1	mmu-mir-30b // chr15:68337415-68337510 (-) /// mmu-mir-30d // chr15:68341208-68341289 (-)
20500253	2.74605	1.04438	P	1.16332	-0.19473	A	1.30244	-0.03176	A	1.13123	-0.23508	A	1.41529	0.08812	A	1.36042	0.03107	A	1.73727	1.30231	1.33399	0.415745	0.481259	PA	0	miRNA	miRBase	Mus musculus	mmu-miR-99a-5p	chr16:77598940-77598961 (+)	22	AACCCGUAGAUCCGAUCUUGUG	MIMAT0000131_st	MIMAT0000131	ENSMUST00000114231 // antisense // intron // 1 /// ENSMUST00000182820 // sense // intron // 7 /// ENSMUST00000183099 // sense // intron // 5 /// ENSMUST00000183327 // sense // intron // 3 /// OTTMUST00000113989 // sense // intron // 5 /// OTTMUST00000113994 // sense // intron // 7 /// OTTMUST00000113997 // sense // intron // 3	mmu-mir-99a // chr16:77598936-77599000 (+) /// mmu-let-7c-1 // chr16:77599657-77599750 (+)
20500254	1.35967	0.07314	A	1.35646	0.06972	A	1.22847	-0.07326	A	1.18285	-0.12786	A	1.15426	-0.16315	A	1.73716	0.42661	A	1.31487	1.35809	0.968173	-0.0466626	0.916445	AA	0	miRNA	miRBase	Mus musculus	mmu-miR-99a-3p	chr16:77598977-77598997 (+)	21	CAAGCUCGUUUCUAUGGGUCU	MIMAT0016981_st	MIMAT0016981	ENSMUST00000114231 // antisense // intron // 1 /// ENSMUST00000182820 // sense // intron // 7 /// ENSMUST00000183099 // sense // intron // 5 /// ENSMUST00000183327 // sense // intron // 3 /// OTTMUST00000113989 // sense // intron // 5 /// OTTMUST00000113994 // sense // intron // 7 /// OTTMUST00000113997 // sense // intron // 3	mmu-mir-99a // chr16:77598936-77599000 (+) /// mmu-let-7c-1 // chr16:77599657-77599750 (+)
20500255	2.77737	0.6736	P	1.69002	-0.04307	A	1.43755	-0.2765	A	1.40154	-0.3131	A	7.10407	2.02853	P	1.79245	0.04182	A	1.96831	3.43269	0.573403	-0.802378	0.582293	PA	0	miRNA	miRBase	Mus musculus	mmu-miR-99b-5p	chr17:17830194-17830215 (+)	22	CACCCGUAGAACCGACCUUGCG	MIMAT0000132_st	MIMAT0000132	---	mmu-mir-99b // chr17:17830188-17830257 (+) /// mmu-mir-125a // chr17:17830812-17830879 (+) /// mmu-let-7e // chr17:17830352-17830444 (+)
20500256	1.43765	0.12599	A	1.29892	-0.02041	A	1.11073	-0.24621	A	1.33593	0.02012	A	1.77853	0.43297	A	0.96472	-0.44954	A	1.28243	1.35973	0.943155	-0.0844328	0.870668	AA	0	miRNA	miRBase	Mus musculus	mmu-miR-99b-3p	chr17:17830232-17830253 (+)	22	CAAGCUCGUGUCUGUGGGUCCG	MIMAT0004525_st	MIMAT0004525	---	mmu-mir-99b // chr17:17830188-17830257 (+) /// mmu-mir-125a // chr17:17830812-17830879 (+) /// mmu-let-7e // chr17:17830352-17830444 (+)
20500257	13.367	0.55174	P	2.02929	-2.16789	P	12.2456	0.42532	P	5.9923	-0.60576	P	22.0435	1.27342	P	2.36961	-1.94422	P	9.21397	10.1351	0.909112	-0.137471	0.983347	PP	0	miRNA	miRBase	Mus musculus	mmu-miR-101a-5p	chr4:101346993-101347014 (-)	22	UCAGUUAUCACAGUGCUGAUGC	MIMAT0004526_st	MIMAT0004526	ENSMUST00000144604 // sense // exon // 2 /// OTTMUST00000019210 // sense // exon // 2	---
20500258	1.10095	-0.05173	A	1.01017	-0.17587	A	1.2935	0.18081	A	1.18133	0.04994	A	1.18133	0.04994	A	1.08788	-0.06896	A	1.13487	1.15018	0.986692	-0.0193284	0.828161	AA	0	miRNA	miRBase	Mus musculus	mmu-miR-101a-3p	chr4:101346957-101346977 (-)	21	UACAGUACUGUGAUAACUGAA	MIMAT0000133_st	MIMAT0000133	ENSMUST00000144604 // sense // exon // 2 /// OTTMUST00000019210 // sense // exon // 2	---
20500259	1.18133	0.1129	A	1.18133	0.1129	A	1.0924	0	A	1.01017	-0.1129	A	1.0924	0	A	1.0924	0	A	1.15169	1.06499	1.08141	0.112908	0.101191	AA	0	miRNA	miRBase	Mus musculus	mmu-miR-124-5p	chr14:64590670-64590691 (+) /// chr2:180894045-180894066 (+) /// chr3:17795686-17795707 (+)	22	CGUGUUCACAGCGGACCUUGAU	MIMAT0004527_st	MIMAT0004527	ENSMUST00000083520 // sense // exon // 1 /// ENSMUST00000183124 // sense // exon // 1 /// OTTMUST00000114313 // sense // exon // 1 /// ENSMUST00000180610 // sense // exon // 2 /// ENSMUST00000181808 // sense // exon // 4	mmu-mir-124-1 // chr14:64590657-64590741 (+) /// mmu-mir-3078 // chr14:64591185-64591271 (+)
20500260	1.15985	-0.21053	A	1.27212	-0.07724	A	1.41204	0.07331	A	1.52903	0.18814	A	1.22341	-0.13356	A	1.52903	0.18814	A	1.28134	1.42716	0.897825	-0.155494	0.322035	AA	0	miRNA	miRBase	Mus musculus	mmu-miR-124-3p	chr14:64590709-64590728 (+) /// chr2:180894083-180894102 (+) /// chr3:17795723-17795742 (+)	20	UAAGGCACGCGGUGAAUGCC	MIMAT0000134_st	MIMAT0000134	ENSMUST00000083520 // sense // exon // 1 /// ENSMUST00000183124 // sense // exon // 1 /// OTTMUST00000114313 // sense // exon // 1 /// ENSMUST00000180610 // sense // exon // 2 /// ENSMUST00000181808 // sense // exon // 4	mmu-mir-124-1 // chr14:64590657-64590741 (+) /// mmu-mir-3078 // chr14:64591185-64591271 (+)
20500261	4.7972	1.64063	P	1.48402	-0.05204	A	1.56772	0.02711	A	1.50935	-0.02763	A	18.7182	3.60481	P	1.22847	-0.3247	A	2.61631	7.152	0.365816	-1.45081	0.712442	PA	0	miRNA	miRBase	Mus musculus	mmu-miR-125a-5p	chr17:17830817-17830840 (+)	24	UCCCUGAGACCCUUUAACCUGUGA	MIMAT0000135_st	MIMAT0000135	ENSMUST00000083545 // sense // exon // 1 /// ENSMUST00000133912 // sense // exon // 1 /// OTTMUST00000083961 // sense // exon // 1	mmu-mir-99b // chr17:17830188-17830257 (+) /// mmu-mir-125a // chr17:17830812-17830879 (+) /// mmu-let-7e // chr17:17830352-17830444 (+)
20500262	1.51578	-0.05575	A	1.75721	0.15748	A	1.46066	-0.10918	A	1.63521	0.05367	A	2.36687	0.58718	P	1.39607	-0.17443	A	1.57788	1.79938	0.876902	-0.189512	0.546275	PA	0	miRNA	miRBase	Mus musculus	mmu-miR-125a-3p	chr17:17830855-17830876 (+)	22	ACAGGUGAGGUUCUUGGGAGCC	MIMAT0004528_st	MIMAT0004528	ENSMUST00000083545 // sense // exon // 1 /// ENSMUST00000133912 // sense // exon // 1 /// OTTMUST00000083961 // sense // exon // 1	mmu-mir-99b // chr17:17830188-17830257 (+) /// mmu-mir-125a // chr17:17830812-17830879 (+) /// mmu-let-7e // chr17:17830352-17830444 (+)
20500263	6.22573	2.07227	P	1.54615	0.06271	A	1.41462	-0.06556	A	1.39077	-0.09009	A	8.81032	2.57322	P	1.39089	-0.08996	A	3.06217	3.86399	0.792488	-0.33554	0.928239	PA	0	miRNA	miRBase	Mus musculus	mmu-miR-125b-5p	chr16:77646279-77646300 (+) /// chr9:41581940-41581961 (+)	22	UCCCUGAGACCCUAACUUGUGA	MIMAT0000136_st	MIMAT0000136	ENSMUST00000182820 // sense // intron // 7 /// ENSMUST00000183099 // sense // intron // 5 /// ENSMUST00000183327 // sense // intron // 3 /// OTTMUST00000113989 // sense // intron // 5 /// OTTMUST00000113994 // sense // intron // 7 /// OTTMUST00000113997 // sense // intron // 3 /// OTTMUST00000114016 // sense // exon // 1 /// ENSMUST00000098868 // sense // intron // 2 /// ENSMUST00000180622 // sen…	---
20500264	1.35933	0.04163	A	1.282	-0.04287	A	1.67699	0.34461	P	1.22847	-0.10441	A	1.05048	-0.33021	A	1.46066	0.14536	A	1.43944	1.24654	1.15475	0.207582	0.30835	PA	0	miRNA	miRBase	Mus musculus	mmu-miR-125b-2-3p	chr16:77646318-77646339 (+)	22	ACAAGUCAGGUUCUUGGGACCU	MIMAT0004529_st	MIMAT0004529	ENSMUST00000182820 // sense // intron // 7 /// ENSMUST00000183099 // sense // intron // 5 /// ENSMUST00000183327 // sense // intron // 3 /// OTTMUST00000113989 // sense // intron // 5 /// OTTMUST00000113994 // sense // intron // 7 /// OTTMUST00000113997 // sense // intron // 3 /// OTTMUST00000114016 // sense // exon // 1	---
20500265	1.17174	0	A	1.17174	0	A	1.17174	0	A	1.36896	0.22443	A	1.14239	-0.0366	A	1.5275	0.38252	A	1.17174	1.34628	0.870352	-0.20033	0.194742	AA	0	miRNA	miRBase	Mus musculus	mmu-miR-126a-5p	chr2:26591365-26591385 (+)	21	CAUUAUUACUUUUGGUACGCG	MIMAT0000137_st	MIMAT0000137	ENSMUST00000100290 // sense // intron // 7 /// ENSMUST00000102907 // sense // intron // 7 /// ENSMUST00000131112 // sense // intron // 1 /// ENSMUST00000139801 // sense // intron // 7 /// ENSMUST00000147351 // sense // exon // 4 /// ENSMUST00000150404 // sense // intron // 6 /// ENSMUST00000166920 // sense // intron // 7 /// ENSMUST00000174066 // sense // intron // 3 /// ENSMUST00000174211 // sen…	mmu-mir-126a // chr2:26591357-26591429 (+) /// mmu-mir-126b // chr2:26591363-26591420 (-)
20500266	3.08798	0.76627	P	1.79255	-0.01838	P	1.83851	0.01815	P	1.61455	-0.16926	A	3.02046	0.73438	P	1.46066	-0.31376	A	2.23968	2.03189	1.10226	0.14047	0.701087	PA	0	miRNA	miRBase	Mus musculus	mmu-miR-126a-3p	chr2:26591402-26591423 (+)	22	UCGUACCGUGAGUAAUAAUGCG	MIMAT0000138_st	MIMAT0000138	ENSMUST00000100290 // sense // intron // 7 /// ENSMUST00000102907 // sense // intron // 7 /// ENSMUST00000131112 // sense // intron // 1 /// ENSMUST00000139801 // sense // intron // 7 /// ENSMUST00000147351 // sense // exon // 4 /// ENSMUST00000150404 // sense // intron // 6 /// ENSMUST00000166920 // sense // intron // 7 /// ENSMUST00000174066 // sense // intron // 3 /// ENSMUST00000174211 // sen…	mmu-mir-126a // chr2:26591357-26591429 (+) /// mmu-mir-126b // chr2:26591363-26591420 (-)
20500267	1.24415	0.01827	A	1.11227	-0.14337	A	1.46066	0.24974	A	1.23628	0.00912	A	1.21298	-0.01833	A	1.2207	-0.00918	A	1.27236	1.22332	1.04009	0.0567051	0.698169	AA	0	miRNA	miRBase	Mus musculus	mmu-miR-127-5p	chr12:109592854-109592875 (+)	22	CUGAAGCUCAGAGGGCUCUGAU	MIMAT0004530_st	MIMAT0004530	ENSMUST00000093568 // sense // exon // 1 /// ENSMUST00000149046 // antisense // exon // 2	mmu-mir-127 // chr12:109592846-109592915 (+) /// mmu-mir-136 // chr12:109595327-109595388 (+) /// mmu-mir-337 // chr12:109585789-109585885 (+) /// mmu-mir-431 // chr12:109590447-109590537 (+) /// mmu-mir-433 // chr12:109591715-109591838 (+) /// mmu-mir-434 // chr12:109594506-109594599 (+) /// mmu-mir-540 // chr12:109586080-109586146 (+) /// mmu-mir-665 // chr12:109586314-109586407 (+) /// mmu-mir…
20500268	1.35113	0.05414	A	1.4747	0.18039	A	1.07444	-0.27643	A	1.44665	0.15269	A	1.12732	-0.20713	A	1.2516	-0.05625	A	1.30009	1.27519	1.01953	0.0278993	0.900144	AA	0	miRNA	miRBase	Mus musculus	mmu-miR-127-3p	chr12:109592888-109592909 (+)	22	UCGGAUCCGUCUGAGCUUGGCU	MIMAT0000139_st	MIMAT0000139	ENSMUST00000093568 // sense // exon // 1 /// ENSMUST00000149046 // antisense // exon // 2	mmu-mir-127 // chr12:109592846-109592915 (+) /// mmu-mir-136 // chr12:109595327-109595388 (+) /// mmu-mir-337 // chr12:109585789-109585885 (+) /// mmu-mir-431 // chr12:109590447-109590537 (+) /// mmu-mir-433 // chr12:109591715-109591838 (+) /// mmu-mir-434 // chr12:109594506-109594599 (+) /// mmu-mir-540 // chr12:109586080-109586146 (+) /// mmu-mir-665 // chr12:109586314-109586407 (+) /// mmu-mir…
20500269	2.07546	0.85776	P	0.93042	-0.29972	A	1.14526	0	A	1.05048	-0.12462	A	1.14526	0	A	1.20742	0.07626	A	1.38371	1.13439	1.21979	0.286633	0.596294	PA	0	miRNA	miRBase	Mus musculus	mmu-miR-128-1-5p	chr1:128202369-128202389 (+)	21	CGGGGCCGUAGCACUGUCUGA	MIMAT0016982_st	MIMAT0016982	ENSMUST00000036288 // sense // intron // 19 /// ENSMUST00000083586 // sense // exon // 1	---
20500270	2.17157	0.58311	P	1.24079	-0.22437	A	1.44813	-0.00143	A	1.04005	-0.47897	A	1.51754	0.06611	A	1.45101	0.00143	A	1.62016	1.3362	1.21252	0.278003	0.43528	PA	0	miRNA	miRBase	Mus musculus	mmu-miR-128-3p	chr1:128202404-128202424 (+) /// chr9:112118644-112118664 (-)	21	UCACAGUGAACCGGUCUCUUU	MIMAT0000140_st	MIMAT0000140	ENSMUST00000036288 // sense // intron // 19 /// ENSMUST00000083586 // sense // exon // 1 /// ENSMUST00000035085 // sense // intron // 17 /// ENSMUST00000070218 // sense // intron // 17 /// ENSMUST00000083507 // sense // exon // 1 /// ENSMUST00000111872 // sense // intron // 17 /// ENSMUST00000159246 // sense // intron // 15 /// ENSMUST00000159432 // sense // intron // 16 /// ENSMUST00000159451 //…	---
20500271	1.13916	0.06603	A	0.98177	-0.14849	A	1.03724	-0.06919	A	1.22847	0.17491	A	1.00936	-0.10851	A	1.21298	0.15661	A	1.05272	1.15027	0.915197	-0.127846	0.323258	AA	0	miRNA	miRBase	Mus musculus	mmu-miR-130a-5p	chr2:84741155-84741176 (-)	22	GCUCUUUUCACAUUGUGCUACU	MIMAT0016983_st	MIMAT0016983	---	---
20500272	1.29241	-0.00223	A	1.16876	-0.14731	A	1.77138	0.45259	P	1.2964	0.00223	A	1.15544	-0.16385	A	1.35196	0.06276	A	1.41085	1.26793	1.11272	0.154086	0.525762	PA	0	miRNA	miRBase	Mus musculus	mmu-miR-130a-3p	chr2:84741116-84741137 (-)	22	CAGUGCAAUGUUAAAAGGGCAU	MIMAT0000141_st	MIMAT0000141	---	---
20500273	1.2033	0.02587	A	1.7821	0.59246	A	1.16052	-0.02635	A	1.04529	-0.17722	A	1.07246	-0.1402	A	1.2033	0.02587	A	1.38197	1.10702	1.24838	0.320053	0.229268	AA	0	miRNA	miRBase	Mus musculus	mmu-miR-9-5p	chr13:83738821-83738843 (+) /// chr3:88215613-88215635 (+) /// chr7:79505279-79505301 (+)	23	UCUUUGGUUAUCUAGCUGUAUGA	MIMAT0000142_st	MIMAT0000142	ENSMUST00000052354 // sense // exon // 1 /// ENSMUST00000083490 // sense // exon // 1 /// ENSMUST00000131907 // sense // exon // 4 /// OTTMUST00000084855 // sense // exon // 4 /// ENSMUST00000175135 // antisense // exon // 1 /// ENSMUST00000180582 // sense // intron // 2 /// ENSMUST00000181356 // sense // intron // 1 /// ENSMUST00000181396 // sense // intron // 1 /// ENSMUST00000181550 // sense /…	mmu-mir-9-1 // chr3:88215598-88215686 (+) /// mmu-mir-3093 // chr3:88215171-88215257 (+)
20500274	1.34431	0.04313	A	1.08641	-0.26417	A	1.29175	-0.01441	A	1.27943	-0.02823	A	1.31768	0.01427	A	1.73272	0.4093	A	1.24082	1.44328	0.859727	-0.21805	0.279488	AA	0	miRNA	miRBase	Mus musculus	mmu-miR-9-3p	chr13:83738858-83738879 (+) /// chr3:88215652-88215673 (+) /// chr7:79505318-79505339 (+)	22	AUAAAGCUAGAUAACCGAAAGU	MIMAT0000143_st	MIMAT0000143	ENSMUST00000052354 // sense // exon // 1 /// ENSMUST00000083490 // sense // exon // 1 /// ENSMUST00000131907 // sense // exon // 4 /// OTTMUST00000084855 // sense // exon // 4 /// ENSMUST00000175135 // antisense // exon // 1 /// ENSMUST00000180582 // sense // intron // 2 /// ENSMUST00000181356 // sense // intron // 1 /// ENSMUST00000181396 // sense // intron // 1 /// ENSMUST00000181550 // sense /…	mmu-mir-9-1 // chr3:88215598-88215686 (+) /// mmu-mir-3093 // chr3:88215171-88215257 (+)
20500275	1.19118	0	A	1.33954	0.16935	A	1.12912	-0.07719	A	1.393	0.2258	A	1.19118	0	A	1.19118	0	A	1.21995	1.25845	0.969402	-0.0448336	0.692435	AA	0	miRNA	miRBase	Mus musculus	mmu-miR-132-5p	chr11:75173686-75173707 (+)	22	AACCGUGGCUUUCGAUUGUUAC	MIMAT0016984_st	MIMAT0016984	ENSMUST00000083603 // sense // exon // 1 /// ENSMUST00000134252 // sense // intron // 1 /// OTTMUST00000013960 // sense // intron // 1	mmu-mir-132 // chr11:75173682-75173747 (+) /// mmu-mir-212 // chr11:75173388-75173478 (+)
20500276	1.19512	0	A	1.19512	0	A	1.19512	0	A	1.19512	0	A	1.19512	0	A	1.19512	0	A	1.19512	1.19512	1	0	1	AA	0	miRNA	miRBase	Mus musculus	mmu-miR-132-3p	chr11:75173723-75173744 (+)	22	UAACAGUCUACAGCCAUGGUCG	MIMAT0000144_st	MIMAT0000144	ENSMUST00000083603 // sense // exon // 1 /// ENSMUST00000134252 // sense // intron // 1 /// OTTMUST00000013960 // sense // intron // 1	mmu-mir-132 // chr11:75173682-75173747 (+) /// mmu-mir-212 // chr11:75173388-75173478 (+)
20500277	1.18133	0	A	1.18133	0	A	1.18133	0	A	1.27749	0.1129	A	1.0924	-0.1129	A	1.27749	0.1129	A	1.18133	1.21579	0.971654	-0.041486	0.643332	AA	0	miRNA	miRBase	Mus musculus	mmu-miR-133a-5p	chr18:10782950-10782970 (-) /// chr2:180398401-180398421 (+)	21	GCUGGUAAAAUGGAACCAAAU	MIMAT0003473_st	MIMAT0003473	ENSMUST00000052838 // antisense // intron // 12 /// ENSMUST00000083465 // sense // exon // 1 /// ENSMUST00000124288 // antisense // intron // 5 /// ENSMUST00000165555 // antisense // intron // 13 /// ENSMUST00000179771 // sense // intron // 1 /// OTTMUST00000070815 // antisense // intron // 12 /// OTTMUST00000070818 // antisense // intron // 5 /// OTTMUST00000111849 // sense // intron // 1	mmu-mir-133a-1 // chr18:10782909-10782976 (-) /// mmu-mir-1a-2 // chr18:10785481-10785552 (-) /// mmu-mir-1b // chr18:10785446-10785567 (+) /// mmu-mir-1a-1 // chr2:180389048-180389124 (+) /// mmu-mir-133a-2 // chr2:180398379-180398482 (+)
20500278	6.80261	2.52819	P	1.05177	-0.16508	A	6.13206	2.37847	P	1.03204	-0.1924	A	1.17927	0	A	1.17927	0	A	4.66215	1.13019	4.12509	2.04442	0.133745	PA	0	miRNA	miRBase	Mus musculus	mmu-miR-133a-3p	chr18:10782913-10782934 (-) /// chr2:180398437-180398458 (+)	22	UUUGGUCCCCUUCAACCAGCUG	MIMAT0000145_st	MIMAT0000145	ENSMUST00000052838 // antisense // intron // 12 /// ENSMUST00000083465 // sense // exon // 1 /// ENSMUST00000124288 // antisense // intron // 5 /// ENSMUST00000165555 // antisense // intron // 13 /// ENSMUST00000179771 // sense // intron // 1 /// OTTMUST00000070815 // antisense // intron // 12 /// OTTMUST00000070818 // antisense // intron // 5 /// OTTMUST00000111849 // sense // intron // 1	mmu-mir-133a-1 // chr18:10782909-10782976 (-) /// mmu-mir-1a-2 // chr18:10785481-10785552 (-) /// mmu-mir-1b // chr18:10785446-10785567 (+) /// mmu-mir-1a-1 // chr2:180389048-180389124 (+) /// mmu-mir-133a-2 // chr2:180398379-180398482 (+)
20500279	1.23358	-0.11552	A	1.23358	-0.11552	A	1.46066	0.12825	P	1.6035	0.26285	P	1.22847	-0.12151	A	1.43926	0.10696	A	1.30927	1.42374	0.919599	-0.120923	0.444365	PA	0	miRNA	miRBase	Mus musculus	mmu-miR-134-5p	chr12:109734145-109734166 (+)	22	UGUGACUGGUUGACCAGAGGGG	MIMAT0000146_st	MIMAT0000146	ENSMUST00000182185 // sense // exon // 4 /// ENSMUST00000182499 // sense // exon // 5 /// ENSMUST00000183144 // sense // exon // 8 /// OTTMUST00000114049 // sense // exon // 8 /// OTTMUST00000114051 // sense // exon // 4 /// OTTMUST00000114052 // sense // exon // 5	mmu-mir-134 // chr12:109734139-109734209 (+) /// mmu-mir-154 // chr12:109738433-109738498 (+) /// mmu-mir-300 // chr12:109724313-109724391 (+) /// mmu-mir-377 // chr12:109740510-109740577 (+) /// mmu-mir-381 // chr12:109726822-109726896 (+) /// mmu-mir-382 // chr12:109733771-109733846 (+) /// mmu-mir-409 // chr12:109743158-109743236 (+) /// mmu-mir-410 // chr12:109743715-109743795 (+) /// mmu-mir…
20500280	1.16859	0.01722	A	1.34185	0.21667	A	1.28921	0.15894	A	0.95852	-0.26868	A	1.14087	-0.01743	A	1.10605	-0.06214	A	1.26655	1.06848	1.18538	0.245344	0.0643554	AA	0	miRNA	miRBase	Mus musculus	mmu-miR-134-3p	chr12:109734184-109734203 (+)	20	CUGUGGGCCACCUAGUCACC	MIMAT0016985_st	MIMAT0016985	ENSMUST00000182185 // sense // exon // 4 /// ENSMUST00000182499 // sense // exon // 5 /// ENSMUST00000183144 // sense // exon // 8 /// OTTMUST00000114049 // sense // exon // 8 /// OTTMUST00000114051 // sense // exon // 4 /// OTTMUST00000114052 // sense // exon // 5	mmu-mir-134 // chr12:109734139-109734209 (+) /// mmu-mir-154 // chr12:109738433-109738498 (+) /// mmu-mir-300 // chr12:109724313-109724391 (+) /// mmu-mir-377 // chr12:109740510-109740577 (+) /// mmu-mir-381 // chr12:109726822-109726896 (+) /// mmu-mir-382 // chr12:109733771-109733846 (+) /// mmu-mir-409 // chr12:109743158-109743236 (+) /// mmu-mir-410 // chr12:109743715-109743795 (+) /// mmu-mir…
20500281	1.11167	-0.03462	A	0.96554	-0.23795	A	1.36318	0.25961	A	1.16568	0.03381	A	1.16568	0.03381	A	1.11167	-0.03462	A	1.1468	1.14768	0.999233	-0.00110663	0.921611	AA	0	miRNA	miRBase	Mus musculus	mmu-miR-135a-5p	chr10:92072141-92072163 (-) /// chr9:106154140-106154162 (+)	23	UAUGGCUUUUUAUUCCUAUGUGA	MIMAT0000147_st	MIMAT0000147	ENSMUST00000036382 // antisense // 3UTR // 4 /// ENSMUST00000112543 // antisense // 3UTR // 5 /// ENSMUST00000143956 // sense // intron // 4 /// OTTMUST00000088120 // sense // intron // 4 /// OTTMUST00000088123 // antisense // 3UTR // 5 /// OTTMUST00000088124 // antisense // 3UTR // 4 /// ENSMUST00000181977 // sense // intron // 2 /// ENSMUST00000182440 // sense // intron // 4 /// OTTMUST00000113…	---
20500282	5.75806	1.13895	P	2.36636	-0.14396	P	6.92494	1.40517	P	1.52713	-0.77581	P	2.863	0.13089	P	1.60928	-0.70021	P	5.01645	1.9998	2.50847	1.32681	0.0894865	PP	0	miRNA	miRBase	Mus musculus	mmu-miR-135a-1-3p	chr9:106154179-106154200 (+)	22	UAUAGGGAUUGGAGCCGUGGCG	MIMAT0004531_st	MIMAT0004531	ENSMUST00000036382 // antisense // 3UTR // 4 /// ENSMUST00000112543 // antisense // 3UTR // 5 /// ENSMUST00000143956 // sense // intron // 4 /// OTTMUST00000088120 // sense // intron // 4 /// OTTMUST00000088123 // antisense // 3UTR // 5 /// OTTMUST00000088124 // antisense // 3UTR // 4	---
20500283	1.40567	0.3073	A	0.98666	-0.20333	A	1.136	0	A	1.11061	-0.0326	A	1.136	0	A	1.136	0	A	1.17611	1.12754	1.04308	0.0608487	0.774937	AA	0	miRNA	miRBase	Mus musculus	mmu-miR-136-5p	chr12:109595331-109595352 (+)	22	ACUCCAUUUGUUUUGAUGAUGG	MIMAT0000148_st	MIMAT0000148	ENSMUST00000093621 // sense // exon // 1 /// ENSMUST00000149046 // antisense // exon // 2	mmu-mir-127 // chr12:109592846-109592915 (+) /// mmu-mir-136 // chr12:109595327-109595388 (+) /// mmu-mir-337 // chr12:109585789-109585885 (+) /// mmu-mir-431 // chr12:109590447-109590537 (+) /// mmu-mir-433 // chr12:109591715-109591838 (+) /// mmu-mir-434 // chr12:109594506-109594599 (+) /// mmu-mir-540 // chr12:109586080-109586146 (+) /// mmu-mir-665 // chr12:109586314-109586407 (+) /// mmu-mir…
20500284	0.9752	-0.0937	A	1.13967	0.13114	A	1.22847	0.23939	A	0.96068	-0.11534	A	0.97455	-0.09466	A	1.10608	0.08798	A	1.11445	1.01377	1.09931	0.136597	0.320945	AA	0	miRNA	miRBase	Mus musculus	mmu-miR-136-3p	chr12:109595366-109595387 (+)	22	AUCAUCGUCUCAAAUGAGUCUU	MIMAT0004532_st	MIMAT0004532	ENSMUST00000093621 // sense // exon // 1 /// ENSMUST00000149046 // antisense // exon // 2	mmu-mir-127 // chr12:109592846-109592915 (+) /// mmu-mir-136 // chr12:109595327-109595388 (+) /// mmu-mir-337 // chr12:109585789-109585885 (+) /// mmu-mir-431 // chr12:109590447-109590537 (+) /// mmu-mir-433 // chr12:109591715-109591838 (+) /// mmu-mir-434 // chr12:109594506-109594599 (+) /// mmu-mir-540 // chr12:109586080-109586146 (+) /// mmu-mir-665 // chr12:109586314-109586407 (+) /// mmu-mir…
20500285	1.18133	0	A	1.30125	0.13949	A	1.40461	0.24977	A	1.18133	0	A	1.01017	-0.2258	A	1.18133	0	A	1.29573	1.12428	1.1525	0.204768	0.120881	AA	0	miRNA	miRBase	Mus musculus	mmu-miR-137-5p	chr3:118433865-118433887 (+)	23	ACGGGUAUUCUUGGGUGGAUAAU	MIMAT0016986_st	MIMAT0016986	ENSMUST00000083635 // sense // exon // 1 /// ENSMUST00000180593 // sense // exon // 1 /// ENSMUST00000180774 // sense // exon // 3 /// ENSMUST00000181926 // sense // exon // 1 /// OTTMUST00000112489 // sense // exon // 3 /// OTTMUST00000112490 // sense // exon // 1 /// OTTMUST00000112491 // sense // exon // 1	---
20500286	1.05048	-0.1129	A	1.136	0	A	1.136	0	A	1.22847	0.1129	A	1.136	0	A	1.136	0	A	1.10749	1.16682	0.949153	-0.0752881	0.2302	AA	0	miRNA	miRBase	Mus musculus	mmu-miR-137-3p	chr3:118433901-118433923 (+)	23	UUAUUGCUUAAGAAUACGCGUAG	MIMAT0000149_st	MIMAT0000149	ENSMUST00000083635 // sense // exon // 1 /// ENSMUST00000180593 // sense // exon // 1 /// ENSMUST00000180774 // sense // exon // 3 /// ENSMUST00000181926 // sense // exon // 1 /// OTTMUST00000112489 // sense // exon // 3 /// OTTMUST00000112490 // sense // exon // 1 /// OTTMUST00000112491 // sense // exon // 1	---
20500287	2.24273	0.37632	P	1.68606	-0.03528	A	6.06052	1.81051	P	1.34614	-0.36011	A	1.76953	0.03444	A	1.33954	-0.36719	A	3.32977	1.48507	2.24216	1.16489	0.174477	PA	0	miRNA	miRBase	Mus musculus	mmu-miR-138-5p	chr8:94324312-94324334 (+) /// chr9:122682898-122682920 (+)	23	AGCUGGUGUUGUGAAUCAGGCCG	MIMAT0000150_st	MIMAT0000150	---	---
20500288	1.18426	-0.0285	A	0.92645	-0.3827	A	1.17003	-0.04594	A	1.23152	0.02795	A	1.40758	0.22073	A	1.36827	0.17987	A	1.09358	1.33579	0.818677	-0.288634	0.084534	AA	0	miRNA	miRBase	Mus musculus	mmu-miR-138-2-3p	chr8:94324359-94324379 (+)	21	GCUAUUUCACGACACCAGGGU	MIMAT0016987_st	MIMAT0016987	---	---
20500289	1.29219	0.2169	A	1.1227	0.01404	A	0.96004	-0.21176	A	1.10095	-0.01418	A	1.01807	-0.12708	A	1.1675	0.07049	A	1.12498	1.09551	1.0269	0.0382968	0.836757	AA	0	miRNA	miRBase	Mus musculus	mmu-miR-140-5p	chr8:107551249-107551270 (+)	22	CAGUGGUUUUACCCUAUGGUAG	MIMAT0000151_st	MIMAT0000151	ENSMUST00000166615 // sense // intron // 16	---
20500290	48.2629	2.71503	P	3.06637	-1.26128	P	19.856	1.4337	P	1.41222	-2.37984	A	11.6343	0.6625	P	1.59238	-2.20662	A	23.7284	4.87963	4.86275	2.28177	0.212407	PA	0	miRNA	miRBase	Mus musculus	mmu-miR-140-3p	chr8:107551288-107551308 (+)	21	UACCACAGGGUAGAACCACGG	MIMAT0000152_st	MIMAT0000152	ENSMUST00000166615 // sense // intron // 16	---
20500291	1.10524	-0.17813	A	1.22847	-0.02564	A	1.45362	0.21715	A	1.05048	-0.25144	A	1.27252	0.02519	A	1.45461	0.21814	A	1.26244	1.2592	1.00257	0.00370737	0.969887	AA	0	miRNA	miRBase	Mus musculus	mmu-miR-141-5p	chr6:124717959-124717980 (-)	22	CAUCUUCCAGUGCAGUGUUGGA	MIMAT0004533_st	MIMAT0004533	ENSMUST00000143765 // sense // intron // 1 /// OTTMUST00000067268 // sense // intron // 1	mmu-mir-141 // chr6:124717914-124717985 (-) /// mmu-mir-200c // chr6:124718322-124718390 (-)
20500292	1.32561	0.07319	A	1.27511	0.01716	A	1.19769	-0.07321	A	1.25504	-0.00573	A	1.26504	0.00571	A	1.22847	-0.03661	A	1.26614	1.24952	1.0133	0.019063	0.707608	AA	0	miRNA	miRBase	Mus musculus	mmu-miR-141-3p	chr6:124717917-124717938 (-)	22	UAACACUGUCUGGUAAAGAUGG	MIMAT0000153_st	MIMAT0000153	ENSMUST00000143765 // sense // intron // 1 /// OTTMUST00000067268 // sense // intron // 1	mmu-mir-141 // chr6:124717914-124717985 (-) /// mmu-mir-200c // chr6:124718322-124718390 (-)
20500293	1.35967	0.07135	A	1.22847	-0.07506	A	1.4385	0.15265	A	1.07964	-0.26137	A	1.16115	-0.15637	A	1.56861	0.27757	A	1.34221	1.2698	1.05703	0.0800127	0.616784	AA	0	miRNA	miRBase	Mus musculus	mmu-miR-142-5p	chr11:87756867-87756887 (+)	21	CAUAAAGUAGAAAGCACUACU	MIMAT0000154_st	MIMAT0000154	ENSMUST00000123700 // sense // intron // 1 /// OTTMUST00000002656 // sense // intron // 1	mmu-mir-142 // chr11:87756864-87756927 (+) /// mmu-mir-142b // chr11:87756841-87756955 (-)
20500294	1.17367	0.0678	A	1.21183	0.11396	A	1.22847	0.13363	A	1.05048	-0.09217	A	1.05048	-0.09217	A	1.06591	-0.07114	A	1.20466	1.05562	1.14118	0.190527	0.000782401	AA	0	miRNA	miRBase	Mus musculus	mmu-miR-142-3p	chr11:87756903-87756925 (+)	23	UGUAGUGUUUCCUACUUUAUGGA	MIMAT0000155_st	MIMAT0000155	ENSMUST00000123700 // sense // intron // 1 /// OTTMUST00000002656 // sense // intron // 1	mmu-mir-142 // chr11:87756864-87756927 (+) /// mmu-mir-142b // chr11:87756841-87756955 (-)
20500295	1.24166	-0.22053	A	1.49996	0.05213	A	1.46063	0.0138	A	1.53834	0.08858	A	1.27364	-0.18384	A	1.43282	-0.01393	A	1.40075	1.41493	0.989976	-0.0145346	0.902897	AA	0	miRNA	miRBase	Mus musculus	mmu-miR-144-5p	chr11:78073010-78073032 (+)	23	GGAUAUCAUCAUAUACUGUAAGU	MIMAT0016988_st	MIMAT0016988	---	mmu-mir-144 // chr11:78073005-78073070 (+) /// mmu-mir-451a // chr11:78073170-78073241 (+) /// mmu-mir-451b // chr11:78073170-78073241 (-)
20500296	1.22847	0	A	1.22847	0	A	1.22847	0	A	1.22847	0	A	1.22847	0	A	1.22847	0	A	1.22847	1.22847	1	0	1	AA	0	miRNA	miRBase	Mus musculus	mmu-miR-144-3p	chr11:78073047-78073066 (+)	20	UACAGUAUAGAUGAUGUACU	MIMAT0000156_st	MIMAT0000156	---	mmu-mir-144 // chr11:78073005-78073070 (+) /// mmu-mir-451a // chr11:78073170-78073241 (+) /// mmu-mir-451b // chr11:78073170-78073241 (-)
20500297	25.3711	4.27614	P	1.27155	-0.04239	A	1.34738	0.04118	P	1.10002	-0.25144	A	49.261	5.2334	P	1.27155	-0.04239	A	9.33001	17.2109	0.5421	-0.883368	0.927643	PA	0	miRNA	miRBase	Mus musculus	mmu-miR-145a-5p	chr18:61647866-61647888 (-)	23	GUCCAGUUUUCCCAGGAAUCCCU	MIMAT0000157_st	MIMAT0000157	ENSMUST00000083658 // sense // exon // 1	mmu-mir-145a // chr18:61647825-61647894 (-) /// mmu-mir-143 // chr18:61649196-61649258 (-)
20500298	1.05048	0	A	1.05048	0	A	1.05048	0	A	1.05048	0	A	1.05048	0	A	1.05048	0	A	1.05048	1.05048	1	0	1	AA	0	miRNA	miRBase	Mus musculus	mmu-miR-145a-3p	chr18:61647827-61647848 (-)	22	AUUCCUGGAAAUACUGUUCUUG	MIMAT0004534_st	MIMAT0004534	ENSMUST00000083658 // sense // exon // 1	mmu-mir-145a // chr18:61647825-61647894 (-) /// mmu-mir-143 // chr18:61649196-61649258 (-)
20500299	1.20979	0	A	1.20905	-0.00089	A	1.20979	0	A	1.42656	0.23778	A	1.10516	-0.1305	A	1.41477	0.2258	A	1.20954	1.3155	0.919458	-0.121145	0.408969	AA	0	miRNA	miRBase	Mus musculus	mmu-miR-146a-5p	chr11:43374435-43374456 (-)	22	UGAGAACUGAAUUCCAUGGGUU	MIMAT0000158_st	MIMAT0000158	---	---
20500300	1.0987	-0.00466	A	0.96045	-0.19868	A	1.0987	-0.00466	A	1.10581	0.00465	A	1.56219	0.50311	A	1.36128	0.3045	A	1.05262	1.34309	0.783726	-0.351579	0.0986945	AA	0	miRNA	miRBase	Mus musculus	mmu-miR-146a-3p	chr11:43374399-43374420 (-)	22	CCUGUGAAAUUCAGUUCUUCAG	MIMAT0016989_st	MIMAT0016989	---	---
20500301	1.20288	-0.11485	A	0.82898	-0.65194	A	1.3772	0.08039	A	1.29222	-0.01149	A	1.31289	0.0114	A	1.3772	0.08039	A	1.13635	1.32744	0.856051	-0.224232	0.31127	AA	0	miRNA	miRBase	Mus musculus	mmu-miR-149-5p	chr1:92850381-92850403 (+)	23	UCUGGCUCCGUGUCUUCACUCCC	MIMAT0000159_st	MIMAT0000159	ENSMUST00000045970 // sense // intron // 1	---
20500302	630.723	0.62866	P	312.421	-0.38486	P	912.241	1.16107	P	378.209	-0.10917	P	437.667	0.10148	P	185.733	-1.13512	P	618.462	333.87	1.85241	0.8894	0.225298	PP	0	miRNA	miRBase	Mus musculus	mmu-miR-149-3p	chr1:92850421-92850442 (+)	22	GAGGGAGGGACGGGGGCGGUGC	MIMAT0016990_st	MIMAT0016990	ENSMUST00000045970 // sense // intron // 1	---
20500303	61.4995	4.54538	P	2.15313	-0.29068	P	2.74729	0.06089	P	2.52022	-0.06357	P	24.0852	3.19295	P	1.48189	-0.82968	A	22.1333	9.36245	2.36405	1.24126	0.752114	PA	0	miRNA	miRBase	Mus musculus	mmu-miR-150-5p	chr7:45121762-45121783 (+)	22	UCUCCCAACCCUUGUACCAGUG	MIMAT0000160_st	MIMAT0000160	---	mmu-mir-150 // chr7:45121757-45121821 (+) /// mmu-mir-5121 // chr7:45126918-45126991 (-)
20500304	11.3346	0.17482	P	1.79959	-2.48017	A	30.4934	1.60259	P	10.7085	0.09285	P	9.37357	-0.09924	P	4.24038	-1.24364	P	14.5425	8.10749	1.79372	0.842952	0.892467	PA	0	miRNA	miRBase	Mus musculus	mmu-miR-150-3p	chr7:45121798-45121819 (+)	22	CUGGUACAGGCCUGGGGGAUAG	MIMAT0004535_st	MIMAT0004535	---	mmu-mir-150 // chr7:45121757-45121821 (+) /// mmu-mir-5121 // chr7:45126918-45126991 (-)
20500305	8.23286	2.39176	P	1.28626	-0.28644	A	1.81094	0.20711	P	1.32659	-0.24191	A	4.40609	1.48987	P	1.06493	-0.55886	A	3.77669	2.26587	1.66677	0.737056	0.63047	PA	0	miRNA	miRBase	Mus musculus	mmu-miR-151-5p	chr15:73254855-73254875 (-)	21	UCGAGGAGCUCACAGUCUAGU	MIMAT0004536_st	MIMAT0004536	ENSMUST00000110036 // sense // intron // 22 /// ENSMUST00000170939 // sense // intron // 23	---
20500306	1.62892	0.2682	A	1.35258	0	A	1.35258	0	A	1.33469	-0.01921	A	1.9108	0.49846	P	1.14639	-0.23861	A	1.44469	1.46396	0.986839	-0.0191129	0.970821	PA	0	miRNA	miRBase	Mus musculus	mmu-miR-151-3p	chr15:73254820-73254840 (-)	21	CUAGACUGAGGCUCCUUGAGG	MIMAT0000161_st	MIMAT0000161	ENSMUST00000110036 // sense // intron // 22 /// ENSMUST00000170939 // sense // intron // 23	---
20500307	1.2049	-0.02561	A	1.22451	-0.00233	A	1.22847	0.00233	A	1.21271	-0.0163	A	1.23642	0.01164	A	1.46066	0.25209	A	1.21929	1.30326	0.935569	-0.0960834	0.347723	AA	0	miRNA	miRBase	Mus musculus	mmu-miR-152-5p	chr11:96850400-96850423 (+)	24	UAGGUUCUGUGAUACACUCCGACU	MIMAT0016991_st	MIMAT0016991	ENSMUST00000018816 // sense // intron // 1 /// ENSMUST00000145633 // sense // intron // 1 /// ENSMUST00000155696 // sense // intron // 1 /// OTTMUST00000003223 // sense // intron // 1 /// OTTMUST00000003413 // sense // intron // 1 /// OTTMUST00000003414 // sense // intron // 1	---
20500308	2.91504	1.22329	P	1.05722	-0.23994	A	1.24853	0	P	1.24853	0	A	1.22452	-0.028	A	1.47003	0.23562	A	1.74026	1.31436	1.32404	0.404945	0.604592	PA	0	miRNA	miRBase	Mus musculus	mmu-miR-152-3p	chr11:96850439-96850459 (+)	21	UCAGUGCAUGACAGAACUUGG	MIMAT0000162_st	MIMAT0000162	ENSMUST00000018816 // sense // intron // 1 /// ENSMUST00000145633 // sense // intron // 1 /// ENSMUST00000155696 // sense // intron // 1 /// OTTMUST00000003223 // sense // intron // 1 /// OTTMUST00000003413 // sense // intron // 1 /// OTTMUST00000003414 // sense // intron // 1	---
20500309	1.19509	-0.05588	A	1.29019	0.05459	A	1.09354	-0.18399	A	1.87601	0.59467	P	1.09354	-0.18399	A	1.28949	0.0538	A	1.19294	1.41968	0.840288	-0.251044	0.418693	PA	0	miRNA	miRBase	Mus musculus	mmu-miR-153-5p	chr12:117250827-117250843 (+)	17	UUUGUGACGUUGCAGCU	MIMAT0016992_st	MIMAT0016992	ENSMUST00000070733 // sense // intron // 19	---
20500310	1.22847	0	A	1.22847	0	A	1.39641	0.18487	A	1.22847	0	A	1.22847	0	A	1.22847	0	A	1.28445	1.22847	1.04557	0.0642881	0.373901	AA	0	miRNA	miRBase	Mus musculus	mmu-miR-153-3p	chr12:117250860-117250881 (+)	22	UUGCAUAGUCACAAAAGUGAUC	MIMAT0000163_st	MIMAT0000163	ENSMUST00000070733 // sense // intron // 19	---
20500311	1.29009	-0.0076	A	1.09647	-0.2422	A	1.30372	0.00756	A	1.49158	0.20177	A	1.09647	-0.2422	A	1.30372	0.00756	A	1.23009	1.29726	0.948227	-0.0766962	0.669602	AA	0	miRNA	miRBase	Mus musculus	mmu-miR-154-5p	chr12:109738438-109738459 (+)	22	UAGGUUAUCCGUGUUGCCUUCG	MIMAT0000164_st	MIMAT0000164	ENSMUST00000083514 // sense // exon // 1 /// ENSMUST00000181496 // sense // intron // 1 /// ENSMUST00000181543 // sense // intron // 2 /// ENSMUST00000182185 // sense // intron // 7 /// ENSMUST00000182231 // sense // intron // 1 /// ENSMUST00000182268 // sense // intron // 2 /// ENSMUST00000182499 // sense // intron // 8 /// ENSMUST00000183116 // sense // intron // 2 /// ENSMUST00000183144 // sen…	mmu-mir-134 // chr12:109734139-109734209 (+) /// mmu-mir-154 // chr12:109738433-109738498 (+) /// mmu-mir-377 // chr12:109740510-109740577 (+) /// mmu-mir-382 // chr12:109733771-109733846 (+) /// mmu-mir-409 // chr12:109743158-109743236 (+) /// mmu-mir-410 // chr12:109743715-109743795 (+) /// mmu-mir-412 // chr12:109743289-109743368 (+) /// mmu-mir-485 // chr12:109734902-109734974 (+) /// mmu-mir…
20500312	1.05048	-0.17087	A	1.24349	0.07247	A	1.30501	0.14214	A	1.13666	-0.05711	A	0.97278	-0.28173	A	1.22847	0.05494	A	1.19966	1.11264	1.07821	0.108643	0.470312	AA	0	miRNA	miRBase	Mus musculus	mmu-miR-154-3p	chr12:109738474-109738495 (+)	22	AAUCAUACACGGUUGACCUAUU	MIMAT0004537_st	MIMAT0004537	ENSMUST00000083514 // sense // exon // 1 /// ENSMUST00000181496 // sense // intron // 1 /// ENSMUST00000181543 // sense // intron // 2 /// ENSMUST00000182185 // sense // intron // 7 /// ENSMUST00000182231 // sense // intron // 1 /// ENSMUST00000182268 // sense // intron // 2 /// ENSMUST00000182499 // sense // intron // 8 /// ENSMUST00000183116 // sense // intron // 2 /// ENSMUST00000183144 // sen…	mmu-mir-134 // chr12:109734139-109734209 (+) /// mmu-mir-154 // chr12:109738433-109738498 (+) /// mmu-mir-377 // chr12:109740510-109740577 (+) /// mmu-mir-382 // chr12:109733771-109733846 (+) /// mmu-mir-409 // chr12:109743158-109743236 (+) /// mmu-mir-410 // chr12:109743715-109743795 (+) /// mmu-mir-412 // chr12:109743289-109743368 (+) /// mmu-mir-485 // chr12:109734902-109734974 (+) /// mmu-mir…
20500313	1.45015	0.21844	A	1.22847	-0.0209	A	1.48419	0.25192	A	1.22847	-0.0209	A	0.94979	-0.39207	A	1.26432	0.0206	A	1.3876	1.14753	1.20921	0.274068	0.148043	AA	0	miRNA	miRBase	Mus musculus	mmu-miR-155-5p	chr16:84714143-84714165 (+)	23	UUAAUGCUAAUUGUGAUAGGGGU	MIMAT0000165_st	MIMAT0000165	ENSMUST00000180991 // sense // exon // 2	---
20500314	1.11501	-0.31465	A	1.22847	-0.17486	A	1.05048	-0.40066	A	1.55039	0.16092	A	1.54505	0.15594	P	1.82787	0.39845	P	1.13132	1.6411	0.689365	-0.536659	0.00667159	PA	0	miRNA	miRBase	Mus musculus	mmu-miR-155-3p	chr16:84714182-84714202 (+)	21	CUCCUACCUGUUAGCAUUAAC	MIMAT0016993_st	MIMAT0016993	ENSMUST00000180991 // sense // exon // 2	---
20500315	1.14213	-0.19672	A	1.15404	-0.18174	A	1.35238	0.04706	A	1.96916	0.58914	A	1.27794	-0.03462	A	1.34001	0.03381	A	1.21618	1.52904	0.795392	-0.330262	0.222887	AA	0	miRNA	miRBase	Arabidopsis thaliana	ath-miR156a	chr2:10676534-10676553 (-)	20	UGACAGAAGAGAGUGAGCAC	MIMAT0000166_st	MIMAT0000166	---	---
20500316	1.14213	-0.19672	A	1.15404	-0.18174	A	1.35238	0.04706	A	1.96916	0.58914	A	1.27794	-0.03462	A	1.34001	0.03381	A	1.21618	1.52904	0.795392	-0.330262	0.222887	AA	0	miRNA	miRBase	Arabidopsis thaliana	ath-miR156b	chr4:15074945-15074964 (+)	20	UGACAGAAGAGAGUGAGCAC	MIMAT0000167_st	MIMAT0000167	---	---
20500317	1.14213	-0.19672	A	1.15404	-0.18174	A	1.35238	0.04706	A	1.96916	0.58914	A	1.27794	-0.03462	A	1.34001	0.03381	A	1.21618	1.52904	0.795392	-0.330262	0.222887	AA	0	miRNA	miRBase	Arabidopsis thaliana	ath-miR156c	chr4:15415491-15415510 (-)	20	UGACAGAAGAGAGUGAGCAC	MIMAT0000168_st	MIMAT0000168	---	---
20500318	1.14213	-0.19672	A	1.15404	-0.18174	A	1.35238	0.04706	A	1.96916	0.58914	A	1.27794	-0.03462	A	1.34001	0.03381	A	1.21618	1.52904	0.795392	-0.330262	0.222887	AA	0	miRNA	miRBase	Arabidopsis thaliana	ath-miR156d	chr5:3456713-3456732 (-)	20	UGACAGAAGAGAGUGAGCAC	MIMAT0000169_st	MIMAT0000169	---	---
20500319	1.14213	-0.19672	A	1.15404	-0.18174	A	1.35238	0.04706	A	1.96916	0.58914	A	1.27794	-0.03462	A	1.34001	0.03381	A	1.21618	1.52904	0.795392	-0.330262	0.222887	AA	0	miRNA	miRBase	Arabidopsis thaliana	ath-miR156e	chr5:3867213-3867232 (+)	20	UGACAGAAGAGAGUGAGCAC	MIMAT0000170_st	MIMAT0000170	---	---
20500320	1.14213	-0.19672	A	1.15404	-0.18174	A	1.35238	0.04706	A	1.96916	0.58914	A	1.27794	-0.03462	A	1.34001	0.03381	A	1.21618	1.52904	0.795392	-0.330262	0.222887	AA	0	miRNA	miRBase	Arabidopsis thaliana	ath-miR156f	chr5:9136126-9136145 (+)	20	UGACAGAAGAGAGUGAGCAC	MIMAT0000171_st	MIMAT0000171	---	---
20500321	1.33875	0.19945	A	1.04731	-0.15475	A	1.26003	0.11202	A	1.25432	0.10547	A	1.07747	-0.11379	A	1.07747	-0.11379	A	1.21536	1.13642	1.06947	0.0968915	0.511675	AA	0	miRNA	miRBase	Arabidopsis thaliana	ath-miR157a	chr1:24913276-24913296 (-)	21	UUGACAGAAGAUAGAGAGCAC	MIMAT0000172_st	MIMAT0000172	---	ath-MIR157a // chr1:24913202-24913299 (-) /// ath-MIR157b // chr1:24921086-24921217 (+)
20500322	1.33875	0.19945	A	1.04731	-0.15475	A	1.26003	0.11202	A	1.25432	0.10547	A	1.07747	-0.11379	A	1.07747	-0.11379	A	1.21536	1.13642	1.06947	0.0968915	0.511675	AA	0	miRNA	miRBase	Arabidopsis thaliana	ath-miR157b	chr1:24921104-24921124 (+)	21	UUGACAGAAGAUAGAGAGCAC	MIMAT0000173_st	MIMAT0000173	---	ath-MIR157a // chr1:24913202-24913299 (-) /// ath-MIR157b // chr1:24921086-24921217 (+)
20500323	1.33875	0.19945	A	1.04731	-0.15475	A	1.26003	0.11202	A	1.25432	0.10547	A	1.07747	-0.11379	A	1.07747	-0.11379	A	1.21536	1.13642	1.06947	0.0968915	0.511675	AA	0	miRNA	miRBase	Arabidopsis thaliana	ath-miR157c	chr3:6244673-6244693 (-)	21	UUGACAGAAGAUAGAGAGCAC	MIMAT0000174_st	MIMAT0000174	---	---
20500324	1.22349	-0.25572	A	1.47801	0.01694	A	1.61187	0.14202	A	1.22847	-0.24986	A	1.47801	0.01694	A	1.44351	-0.01714	A	1.43779	1.38333	1.03937	0.0557076	0.741079	AA	0	miRNA	miRBase	Arabidopsis thaliana	ath-miR157d	chr1:18026989-18027008 (-)	20	UGACAGAAGAUAGAGAGCAC	MIMAT0000175_st	MIMAT0000175	---	---
20500325	1.35967	-0.01329	A	1.52398	0.15129	A	1.38485	0.01317	A	1.22847	-0.1597	A	1.30318	-0.07451	A	1.6466	0.26294	A	1.42283	1.39275	1.0216	0.0308304	0.7833	AA	0	miRNA	miRBase	Arabidopsis thaliana	ath-miR158a	chr3:3366349-3366368 (-)	20	UCCCAAAUGUAGACAAAGCA	MIMAT0000176_st	MIMAT0000176	---	---
20500326	1.40142	0.20102	A	1.20984	-0.01106	A	1.27938	0.06956	A	1.10413	-0.14296	A	1.22847	0.01098	A	1.13374	-0.10478	A	1.29688	1.15545	1.12241	0.166594	0.0988165	AA	0	miRNA	miRBase	Arabidopsis thaliana	ath-miR159a	chr1:27713234-27713254 (-)	21	UUUGGAUUGAAGGGAGCUCUA	MIMAT0000177_st	MIMAT0000177	---	---
20500327	1.17437	0.05622	A	1.06104	-0.09018	A	1.2896	0.19127	A	1.0846	-0.0585	A	1.01035	-0.1608	A	1.58254	0.48658	A	1.175	1.22583	0.958537	-0.0610941	0.873904	AA	0	miRNA	miRBase	Arabidopsis thaliana	ath-miR160a	chr2:16340282-16340302 (+)	21	UGCCUGGCUCCCUGUAUGCCA	MIMAT0000178_st	MIMAT0000178	---	---
20500328	1.17437	0.05622	A	1.06104	-0.09018	A	1.2896	0.19127	A	1.0846	-0.0585	A	1.01035	-0.1608	A	1.58254	0.48658	A	1.175	1.22583	0.958537	-0.0610941	0.873904	AA	0	miRNA	miRBase	Arabidopsis thaliana	ath-miR160b	chr4:9888986-9889006 (+)	21	UGCCUGGCUCCCUGUAUGCCA	MIMAT0000179_st	MIMAT0000179	---	---
20500329	1.17437	0.05622	A	1.06104	-0.09018	A	1.2896	0.19127	A	1.0846	-0.0585	A	1.01035	-0.1608	A	1.58254	0.48658	A	1.175	1.22583	0.958537	-0.0610941	0.873904	AA	0	miRNA	miRBase	Arabidopsis thaliana	ath-miR160c	chr5:19009158-19009178 (-)	21	UGCCUGGCUCCCUGUAUGCCA	MIMAT0000180_st	MIMAT0000180	---	---
20500330	1.35024	0.00573	A	1.35838	0.01439	A	1.12445	-0.25826	A	1.33954	-0.00575	A	0.96154	-0.48407	A	1.64069	0.28681	A	1.27769	1.31392	0.972424	-0.0403433	0.963693	AA	0	miRNA	miRBase	Arabidopsis thaliana	ath-miR161.2	chr1:17825722-17825742 (+)	21	UCAAUGCAUUGAAAGUGACUA	MIMAT0006779_st	MIMAT0006779	---	---
20500331	1.17673	0	A	1.12142	-0.06946	A	1.39915	0.24977	A	1.17673	0	A	1.17673	0	A	1.17673	0	A	1.23243	1.17673	1.04734	0.0667263	0.568787	AA	0	miRNA	miRBase	Arabidopsis thaliana	ath-miR161.1	chr1:17825731-17825751 (+)	21	UGAAAGUGACUACAUCGGGGU	MIMAT0000181_st	MIMAT0000181	---	---
20500332	1.46845	0.32287	A	1.0924	-0.10392	A	1.18133	0.00899	A	1.0924	-0.10392	A	1.18531	0.01385	A	1.16665	-0.00904	A	1.24739	1.14812	1.08647	0.119643	0.457387	AA	0	miRNA	miRBase	Arabidopsis thaliana	ath-miR162a	chr5:2634936-2634956 (-)	21	UCGAUAAACCUCUGCAUCCAG	MIMAT0000182_st	MIMAT0000182	---	ath-MIR162a // chr5:2634905-2635044 (-) /// ath-MIR834 // chr5:2641426-2641674 (-)
20500333	1.46845	0.32287	A	1.0924	-0.10392	A	1.18133	0.00899	A	1.0924	-0.10392	A	1.18531	0.01385	A	1.16665	-0.00904	A	1.24739	1.14812	1.08647	0.119643	0.457387	AA	0	miRNA	miRBase	Arabidopsis thaliana	ath-miR162b	chr5:7740610-7740630 (-)	21	UCGAUAAACCUCUGCAUCCAG	MIMAT0000183_st	MIMAT0000183	---	---
20500334	1.42545	0.2258	A	1.0587	-0.20333	A	1.21893	0	A	1.0587	-0.20333	A	1.21893	0	A	1.21893	0	A	1.23436	1.16552	1.05906	0.0827895	0.622369	AA	0	miRNA	miRBase	Arabidopsis thaliana	ath-miR163	chr1:24884359-24884382 (+)	24	UUGAAGAGGACUUGGAACUUCGAU	MIMAT0000184_st	MIMAT0000184	---	---
20500335	1.28417	-0.08195	A	1.57242	0.2102	A	1.43428	0.07754	A	1.44088	0.08417	A	1.26924	-0.09882	A	1.07016	-0.34496	A	1.43029	1.26009	1.13507	0.182777	0.278139	AA	0	miRNA	miRBase	Arabidopsis thaliana	ath-miR164a	chr2:19520770-19520790 (+)	21	UGGAGAAGCAGGGCACGUGCA	MIMAT0000185_st	MIMAT0000185	---	---
20500336	1.28417	-0.08195	A	1.57242	0.2102	A	1.43428	0.07754	A	1.44088	0.08417	A	1.26924	-0.09882	A	1.07016	-0.34496	A	1.43029	1.26009	1.13507	0.182777	0.278139	AA	0	miRNA	miRBase	Arabidopsis thaliana	ath-miR164b	chr5:287586-287606 (+)	21	UGGAGAAGCAGGGCACGUGCA	MIMAT0000186_st	MIMAT0000186	---	---
20500337	2.52618	0.07127	A	1.424	-0.75574	A	4.64033	0.94854	P	1.77887	-0.43473	A	2.41374	0.00558	A	2.3951	-0.0056	A	2.8635	2.1959	1.30402	0.382967	0.673299	PA	0	miRNA	miRBase	Arabidopsis thaliana	ath-miR165a	chr1:78932-78952 (-)	21	UCGGACCAGGCUUCAUCCCCC	MIMAT0000187_st	MIMAT0000187	---	---
20500338	2.52618	0.07127	A	1.424	-0.75574	A	4.64033	0.94854	P	1.77887	-0.43473	A	2.41374	0.00558	A	2.3951	-0.0056	A	2.8635	2.1959	1.30402	0.382967	0.673299	PA	0	miRNA	miRBase	Arabidopsis thaliana	ath-miR165b	chr4:369856-369876 (-)	21	UCGGACCAGGCUUCAUCCCCC	MIMAT0000188_st	MIMAT0000188	---	---
20500339	2.09969	0.29517	P	1.32803	-0.36572	A	2.81171	0.71644	P	1.68288	-0.02407	A	1.73951	0.02368	P	1.26028	-0.44126	A	2.07981	1.56089	1.33245	0.414083	0.356159	PA	0	miRNA	miRBase	Arabidopsis thaliana	ath-miR166a	chr2:19176241-19176261 (+)	21	UCGGACCAGGCUUCAUUCCCC	MIMAT0000189_st	MIMAT0000189	---	---
20500340	2.09969	0.29517	P	1.32803	-0.36572	A	2.81171	0.71644	P	1.68288	-0.02407	A	1.73951	0.02368	P	1.26028	-0.44126	A	2.07981	1.56089	1.33245	0.414083	0.356159	PA	0	miRNA	miRBase	Arabidopsis thaliana	ath-miR166b	chr3:22922301-22922321 (+)	21	UCGGACCAGGCUUCAUUCCCC	MIMAT0000190_st	MIMAT0000190	---	---
20500341	2.09969	0.29517	P	1.32803	-0.36572	A	2.81171	0.71644	P	1.68288	-0.02407	A	1.73951	0.02368	P	1.26028	-0.44126	A	2.07981	1.56089	1.33245	0.414083	0.356159	PA	0	miRNA	miRBase	Arabidopsis thaliana	ath-miR166c	chr5:2838737-2838757 (+)	21	UCGGACCAGGCUUCAUUCCCC	MIMAT0000191_st	MIMAT0000191	---	ath-MIR166c // chr5:2838635-2838773 (+) /// ath-MIR166d // chr5:2840622-2840734 (+)
20500342	2.09969	0.29517	P	1.32803	-0.36572	A	2.81171	0.71644	P	1.68288	-0.02407	A	1.73951	0.02368	P	1.26028	-0.44126	A	2.07981	1.56089	1.33245	0.414083	0.356159	PA	0	miRNA	miRBase	Arabidopsis thaliana	ath-miR166d	chr5:2840708-2840728 (+)	21	UCGGACCAGGCUUCAUUCCCC	MIMAT0000192_st	MIMAT0000192	---	ath-MIR166c // chr5:2838635-2838773 (+) /// ath-MIR166d // chr5:2840622-2840734 (+)
20500343	2.09969	0.29517	P	1.32803	-0.36572	A	2.81171	0.71644	P	1.68288	-0.02407	A	1.73951	0.02368	P	1.26028	-0.44126	A	2.07981	1.56089	1.33245	0.414083	0.356159	PA	0	miRNA	miRBase	Arabidopsis thaliana	ath-miR166e	chr5:16775524-16775544 (-)	21	UCGGACCAGGCUUCAUUCCCC	MIMAT0000193_st	MIMAT0000193	---	---
20500344	2.09969	0.29517	P	1.32803	-0.36572	A	2.81171	0.71644	P	1.68288	-0.02407	A	1.73951	0.02368	P	1.26028	-0.44126	A	2.07981	1.56089	1.33245	0.414083	0.356159	PA	0	miRNA	miRBase	Arabidopsis thaliana	ath-miR166f	chr5:17516378-17516398 (+)	21	UCGGACCAGGCUUCAUUCCCC	MIMAT0000194_st	MIMAT0000194	---	---
20500345	2.09969	0.29517	P	1.32803	-0.36572	A	2.81171	0.71644	P	1.68288	-0.02407	A	1.73951	0.02368	P	1.26028	-0.44126	A	2.07981	1.56089	1.33245	0.414083	0.356159	PA	0	miRNA	miRBase	Arabidopsis thaliana	ath-miR166g	chr5:25504882-25504902 (+)	21	UCGGACCAGGCUUCAUUCCCC	MIMAT0000195_st	MIMAT0000195	---	---
20500346	1.23567	0.06967	A	1.11916	-0.07321	A	1.02197	-0.20427	A	1.05664	-0.15613	A	1.23567	0.06967	A	1.23567	0.06967	A	1.1256	1.17599	0.957148	-0.0631856	0.591107	AA	0	miRNA	miRBase	Arabidopsis thaliana	ath-miR167a	chr3:8108090-8108110 (+)	21	UGAAGCUGCCAGCAUGAUCUA	MIMAT0000196_st	MIMAT0000196	---	---
20500347	1.23567	0.06967	A	1.11916	-0.07321	A	1.02197	-0.20427	A	1.05664	-0.15613	A	1.23567	0.06967	A	1.23567	0.06967	A	1.1256	1.17599	0.957148	-0.0631856	0.591107	AA	0	miRNA	miRBase	Arabidopsis thaliana	ath-miR167b	chr3:23406177-23406197 (+)	21	UGAAGCUGCCAGCAUGAUCUA	MIMAT0000197_st	MIMAT0000197	---	---
20500348	1.58067	0.09177	P	1.17715	-0.33347	P	3.47785	1.22943	P	1.38585	-0.098	A	2.68618	0.85679	P	1.05048	-0.49772	A	2.07856	1.7075	1.21731	0.283694	0.714097	PA	0	miRNA	miRBase	Arabidopsis thaliana	ath-miR168a	chr4:10578652-10578672 (+)	21	UCGCUUGGUGCAGGUCGGGAA	MIMAT0000198_st	MIMAT0000198	---	---
20500349	1.58067	0.09177	P	1.17715	-0.33347	P	3.47785	1.22943	P	1.38585	-0.098	A	2.68618	0.85679	P	1.05048	-0.49772	A	2.07856	1.7075	1.21731	0.283694	0.714097	PA	0	miRNA	miRBase	Arabidopsis thaliana	ath-miR168b	chr5:18358873-18358893 (-)	21	UCGCUUGGUGCAGGUCGGGAA	MIMAT0000199_st	MIMAT0000199	---	---
20500350	1.21145	-0.05168	A	1.63809	0.38359	A	1.25564	0	A	1.22847	-0.03156	A	1.25564	0	A	1.25564	0	A	1.36839	1.24658	1.09772	0.134504	0.428594	AA	0	miRNA	miRBase	Arabidopsis thaliana	ath-miR169a	chr3:4359182-4359202 (-)	21	CAGCCAAGGAUGACUUGCCGA	MIMAT0000200_st	MIMAT0000200	---	---
20500351	1.04035	-0.18933	A	1.18624	0	A	1.05048	-0.17534	A	1.46066	0.30023	A	1.18624	0	A	1.21724	0.03721	A	1.09236	1.28805	0.848072	-0.237741	0.105803	AA	0	miRNA	miRBase	Arabidopsis thaliana	ath-miR170	chr5:26411594-26411614 (-)	21	UGAUUGAGCCGUGUCAAUAUC	MIMAT0000201_st	MIMAT0000201	---	---
20500352	1.86513	0.17184	P	1.48402	-0.15792	A	1.66859	0.01119	A	1.66859	0.01119	P	1.25204	-0.40316	A	1.6428	-0.01128	A	1.67258	1.52114	1.09955	0.136919	0.43516	PA	0	miRNA	miRBase	Arabidopsis thaliana	ath-miR171a	chr3:19073521-19073541 (+)	21	UGAUUGAGCCGCGCCAAUAUC	MIMAT0000202_st	MIMAT0000202	---	---
20500353	1.07907	-0.09967	A	1.22094	0.07853	A	1.09157	-0.08305	A	1.25178	0.11453	A	1.01068	-0.19413	A	1.45289	0.32946	A	1.13053	1.23845	0.912856	-0.131541	0.507244	AA	0	miRNA	miRBase	Arabidopsis thaliana	ath-miR172a	chr2:11942918-11942938 (-)	21	AGAAUCUUGAUGAUGCUGCAU	MIMAT0000203_st	MIMAT0000203	---	---
20500354	1.05048	-0.10444	A	1.02967	-0.1333	A	1.20821	0.09738	A	1.05048	-0.10444	A	1.38637	0.29583	A	1.29989	0.2029	A	1.09612	1.24558	0.880008	-0.184412	0.275018	AA	0	miRNA	miRBase	Arabidopsis thaliana	ath-miR172b-5p	chr5:1188278-1188297 (-)	20	GCAGCACCAUUAAGAUUCAC	MIMAT0000204_st	MIMAT0000204	---	---
20500355	1.07907	-0.09967	A	1.22094	0.07853	A	1.09157	-0.08305	A	1.25178	0.11453	A	1.01068	-0.19413	A	1.45289	0.32946	A	1.13053	1.23845	0.912856	-0.131541	0.507244	AA	0	miRNA	miRBase	Arabidopsis thaliana	ath-miR172b-3p	chr5:1188211-1188231 (-)	21	AGAAUCUUGAUGAUGCUGCAU	MIMAT0000205_st	MIMAT0000205	---	---
20500356	1.24295	0.00843	A	1.36263	0.14105	A	1.22847	-0.00848	A	1.09229	-0.17798	A	1.24443	0.01015	A	1.22847	-0.00848	A	1.27802	1.1884	1.07541	0.10489	0.237772	AA	0	miRNA	miRBase	Arabidopsis thaliana	ath-miR173-5p	chr3:8236161-8236182 (+)	22	UUCGCUUGCAGAGAGAAAUCAC	MIMAT0000206_st	MIMAT0000206	---	---
20500357	1.07067	-0.1519	A	1.19898	0.0114	A	1.46066	0.29622	A	1.18011	-0.01149	A	1.09867	-0.11464	A	1.23271	0.05143	A	1.24344	1.1705	1.06232	0.0872122	0.611447	AA	0	miRNA	miRBase	Arabidopsis thaliana	ath-miR173-3p	chr3:8236227-8236247 (+)	21	UGAUUCUCUGUGUAAGCGAAA	MIMAT0022843_st	MIMAT0022843	---	---
20500358	1.41991	0.09016	A	1.24787	-0.09618	A	1.67352	0.32724	P	1.22847	-0.11878	A	1.43102	0.1014	A	1.05048	-0.34459	A	1.4471	1.23666	1.17017	0.22672	0.269315	PA	0	miRNA	miRBase	Arabidopsis thaliana	ath-miR159b	chr1:6220813-6220833 (+)	21	UUUGGAUUGAAGGGAGCUCUU	MIMAT0000207_st	MIMAT0000207	---	---
20500359	1.35967	0.0732	P	1.22847	-0.0732	A	1.06638	-0.27734	A	1.43579	0.15179	A	1.29241	0	P	1.29241	0	A	1.21817	1.3402	0.908947	-0.137732	0.276241	PA	0	miRNA	miRBase	Mus musculus	mmu-miR-10b-5p	chr2:74726074-74726096 (+)	23	UACCCUGUAGAACCGAAUUUGUG	MIMAT0000208_st	MIMAT0000208	ENSMUST00000047904 // sense // intron // 4 /// ENSMUST00000111983 // sense // intron // 1 /// ENSMUST00000144040 // sense // intron // 5 /// OTTMUST00000040120 // sense // intron // 1 /// OTTMUST00000040121 // sense // intron // 5	---
20500360	1.04397	-0.23479	A	1.20917	-0.02285	A	1.23871	0.01198	A	1.45764	0.24677	A	1.22592	-0.003	A	1.23102	0.00299	A	1.16395	1.30486	0.892011	-0.164866	0.219201	AA	0	miRNA	miRBase	Mus musculus	mmu-miR-10b-3p	chr2:74726114-74726135 (+)	22	CAGAUUCGAUUCUAGGGGAAUA	MIMAT0004538_st	MIMAT0004538	ENSMUST00000047904 // sense // intron // 4 /// ENSMUST00000111983 // sense // intron // 1 /// ENSMUST00000144040 // sense // intron // 5 /// OTTMUST00000040120 // sense // intron // 1 /// OTTMUST00000040121 // sense // intron // 5	---
20500361	1.24415	0.01372	A	1.2207	-0.01373	A	1.23628	0.00457	A	1.46996	0.25433	A	1.21298	-0.02288	A	1.22847	-0.00458	A	1.23371	1.3038	0.946239	-0.079723	0.455962	AA	0	miRNA	miRBase	Mus musculus	mmu-miR-129-5p	chr2:94241419-94241439 (-) /// chr6:29022624-29022644 (+)	21	CUUUUUGCGGUCUGGGCUUGC	MIMAT0000209_st	MIMAT0000209	---	mmu-mir-129-2 // chr2:94241364-94241453 (-) /// mmu-mir-129b // chr2:94241378-94241442 (+)
20500362	1.32727	0.02763	A	1.7947	0.4629	A	1.27466	-0.03072	A	1.27692	-0.02817	A	1.27466	-0.03072	A	1.47018	0.17516	A	1.46554	1.34059	1.09321	0.128571	0.537507	AA	0	miRNA	miRBase	Mus musculus	mmu-miR-129-1-3p	chr6:29022667-29022688 (+)	22	AAGCCCUUACCCCAAAAAGUAU	MIMAT0016994_st	MIMAT0016994	---	---
20500363	10.6716	2.70251	P	1.12806	-0.53935	A	2.08661	0.34797	P	1.19224	-0.45951	A	8.35401	2.34928	P	1.05048	-0.64214	A	4.62876	3.53224	1.31043	0.39004	0.77363	PA	0	miRNA	miRBase	Mus musculus	mmu-miR-181a-5p	chr1:137966468-137966490 (+) /// chr2:38852741-38852763 (+)	23	AACAUUCAACGCUGUCGGUGAGU	MIMAT0000210_st	MIMAT0000210	ENSMUST00000076275 // antisense // intron // 3 /// ENSMUST00000112877 // antisense // intron // 4 /// ENSMUST00000142130 // antisense // intron // 2 /// OTTMUST00000029378 // antisense // intron // 4 /// OTTMUST00000030867 // antisense // intron // 2 /// ENSMUST00000182127 // sense // intron // 2 /// ENSMUST00000182158 // sense // exon // 1 /// ENSMUST00000182424 // antisense // intron // 1 /// E…	mmu-mir-181a-2 // chr2:38852735-38852810 (+) /// mmu-mir-181b-2 // chr2:38853830-38853918 (+) /// mmu-mir-181a-1 // chr1:137966455-137966541 (+) /// mmu-mir-181b-1 // chr1:137966639-137966718 (+)
20500364	1.10478	-0.07858	A	1.07124	-0.12306	A	1.22847	0.07452	A	0.97566	-0.25788	A	1.51335	0.37541	A	1.46066	0.32429	A	1.13483	1.31656	0.861968	-0.214293	0.421083	AA	0	miRNA	miRBase	Mus musculus	mmu-miR-181a-2-3p	chr2:38852788-38852809 (+)	22	ACCGACCGUUGACUGUACCUUG	MIMAT0005443_st	MIMAT0005443	ENSMUST00000076275 // antisense // intron // 3 /// ENSMUST00000112877 // antisense // intron // 4 /// ENSMUST00000142130 // antisense // intron // 2 /// OTTMUST00000029378 // antisense // intron // 4 /// OTTMUST00000030867 // antisense // intron // 2	mmu-mir-181a-2 // chr2:38852735-38852810 (+) /// mmu-mir-181b-2 // chr2:38853830-38853918 (+)
20500365	1.37185	0.11471	A	1.17309	-0.1111	A	1.36091	0.10315	A	1.17309	-0.1111	A	1.1486	-0.14155	A	1.57956	0.31811	A	1.30195	1.30042	1.00118	0.00170009	0.93774	AA	0	miRNA	miRBase	Mus musculus	mmu-miR-182-5p	chr6:30165962-30165986 (-)	25	UUUGGCAAUGGUAGAACUCACACCG	MIMAT0000211_st	MIMAT0000211	---	mmu-mir-182 // chr6:30165918-30165992 (-) /// mmu-mir-183 // chr6:30169668-30169737 (-) /// mmu-mir-96 // chr6:30169446-30169551 (-)
20500366	1.13074	-0.11959	A	1.30188	0.08374	A	1.22847	0	A	1.13074	-0.11959	A	1.22847	0	A	1.32507	0.10921	A	1.22036	1.22809	0.993706	-0.00910947	0.928249	AA	0	miRNA	miRBase	Mus musculus	mmu-miR-182-3p	chr6:30165923-30165943 (-)	21	GUGGUUCUAGACUUGCCAACU	MIMAT0016995_st	MIMAT0016995	---	mmu-mir-182 // chr6:30165918-30165992 (-) /// mmu-mir-183 // chr6:30169668-30169737 (-) /// mmu-mir-96 // chr6:30169446-30169551 (-)
20500367	1.0575	0.08065	A	1.2998	0.37828	A	0.93042	-0.10405	A	0.93042	-0.10405	A	0.94251	-0.08542	A	1.46066	0.54662	A	1.09591	1.1112	0.98624	-0.0199892	0.997786	AA	0	miRNA	miRBase	Mus musculus	mmu-miR-183-5p	chr6:30169711-30169732 (-)	22	UAUGGCACUGGUAGAAUUCACU	MIMAT0000212_st	MIMAT0000212	---	mmu-mir-182 // chr6:30165918-30165992 (-) /// mmu-mir-183 // chr6:30169668-30169737 (-) /// mmu-mir-96 // chr6:30169446-30169551 (-)
20500368	1.32847	0.16825	A	1.136	-0.05755	A	1.22847	0.05535	A	1.136	-0.05755	A	1.07124	-0.14223	A	1.22847	0.05535	A	1.23098	1.14524	1.07487	0.104162	0.298753	AA	0	miRNA	miRBase	Mus musculus	mmu-miR-183-3p	chr6:30169672-30169693 (-)	22	GUGAAUUACCGAAGGGCCAUAA	MIMAT0004539_st	MIMAT0004539	---	mmu-mir-182 // chr6:30165918-30165992 (-) /// mmu-mir-183 // chr6:30169668-30169737 (-) /// mmu-mir-96 // chr6:30169446-30169551 (-)
20500369	1.03748	-0.08738	A	1.16488	0.07972	A	1.23614	0.16538	A	1.03964	-0.08438	A	1.03748	-0.08738	A	1.22847	0.15639	A	1.14617	1.10186	1.04021	0.0568716	0.626689	AA	0	miRNA	miRBase	Mus musculus	mmu-miR-184-5p	chr9:89802302-89802323 (-)	22	CCUUAUCACUUUUCCAGCCAGC	MIMAT0022690_st	MIMAT0022690	---	---
20500370	1.136	0	A	1.136	0	A	1.136	0	A	1.2033	0.08304	A	1.07246	-0.08304	A	1.16916	0.04152	A	1.136	1.14831	0.989283	-0.0155451	0.795266	AA	0	miRNA	miRBase	Mus musculus	mmu-miR-184-3p	chr9:89802263-89802284 (-)	22	UGGACGGAGAACUGAUAAGGGU	MIMAT0000213_st	MIMAT0000213	---	---
20500371	49.5117	0.73297	P	10.5783	-1.4937	P	50.2371	0.75395	P	14.8354	-1.00576	P	44.7435	0.58688	P	1.84592	-4.01239	P	36.7757	20.4749	1.79613	0.844894	0.392712	PP	0	miRNA	miRBase	Mus musculus	mmu-miR-185-5p	chr16:18327438-18327459 (-)	22	UGGAGAGAAAGGCAGUUCCUGA	MIMAT0000214_st	MIMAT0000214	ENSMUST00000083530 // sense // exon // 1 /// ENSMUST00000115628 // sense // intron // 1 /// ENSMUST00000125287 // sense // intron // 1 /// ENSMUST00000130752 // sense // intron // 1 /// ENSMUST00000134385 // sense // intron // 1 /// OTTMUST00000064221 // sense // intron // 1 /// OTTMUST00000064223 // sense // intron // 1 /// OTTMUST00000064224 // sense // intron // 1 /// OTTMUST00000064868 // sen…	---
20500372	1.14488	-0.11449	A	1.33399	0.10607	A	1.14072	-0.11974	A	0.97901	-0.34029	A	1.38305	0.15817	A	1.35352	0.12703	A	1.20653	1.23853	0.974166	-0.0377611	0.897519	AA	0	miRNA	miRBase	Mus musculus	mmu-miR-185-3p	chr16:18327405-18327425 (-)	21	AGGGGCUGGCUUUCCUCUGGU	MIMAT0016996_st	MIMAT0016996	ENSMUST00000083530 // sense // exon // 1 /// ENSMUST00000115628 // sense // intron // 1 /// ENSMUST00000125287 // sense // intron // 1 /// ENSMUST00000130752 // sense // intron // 1 /// ENSMUST00000134385 // sense // intron // 1 /// OTTMUST00000064221 // sense // intron // 1 /// OTTMUST00000064223 // sense // intron // 1 /// OTTMUST00000064224 // sense // intron // 1 /// OTTMUST00000064868 // sen…	---
20500373	1.25815	0.07135	A	1.13673	-0.07506	A	1.33954	0.16179	A	1.35159	0.17471	A	1.05017	-0.18933	A	1.13673	-0.07506	A	1.24481	1.1795	1.05537	0.0777504	0.553145	AA	0	miRNA	miRBase	Mus musculus	mmu-miR-186-5p	chr3:157544285-157544306 (+)	22	CAAAGAAUUCUCCUUUUGGGCU	MIMAT0000215_st	MIMAT0000215	ENSMUST00000029831 // sense // intron // 8 /// ENSMUST00000106057 // sense // intron // 8 /// ENSMUST00000106058 // sense // intron // 8 /// ENSMUST00000106063 // sense // intron // 8 /// ENSMUST00000152882 // sense // intron // 7 /// OTTMUST00000040344 // sense // intron // 8 /// OTTMUST00000040345 // sense // intron // 8 /// OTTMUST00000040347 // sense // intron // 7	---
20500374	1.47216	0.08093	A	1.3301	-0.06547	A	1.25842	-0.1454	A	1.74979	0.33017	A	1.21124	-0.20053	A	1.45361	0.06263	A	1.35356	1.47155	0.919821	-0.120574	0.55496	AA	0	miRNA	miRBase	Mus musculus	mmu-miR-186-3p	chr3:157544324-157544345 (+)	22	GCCCUAAGGUGAAUUUUUUGGG	MIMAT0004540_st	MIMAT0004540	ENSMUST00000029831 // sense // intron // 8 /// ENSMUST00000106057 // sense // intron // 8 /// ENSMUST00000106058 // sense // intron // 8 /// ENSMUST00000106063 // sense // intron // 8 /// ENSMUST00000152882 // sense // intron // 7 /// OTTMUST00000040344 // sense // intron // 8 /// OTTMUST00000040345 // sense // intron // 8 /// OTTMUST00000040347 // sense // intron // 7	---
20500375	1.24727	-0.14377	A	1.83851	0.416	A	1.48302	0.106	A	1.24727	-0.14377	A	1.27291	-0.11441	A	1.76994	0.36116	A	1.52293	1.43004	1.06496	0.0907973	0.710568	AA	0	miRNA	miRBase	Mus musculus	mmu-miR-187-5p	chr18:24429147-24429168 (-)	22	AGGCUACAACACAGGACCCGGG	MIMAT0016997_st	MIMAT0016997	---	---
20500376	1.29241	0.0732	A	1.22847	0	A	1.05048	-0.2258	A	1.16769	-0.0732	A	1.22847	0	A	1.26003	0.0366	A	1.19045	1.21873	0.976798	-0.0338675	0.706559	AA	0	miRNA	miRBase	Mus musculus	mmu-miR-187-3p	chr18:24429110-24429131 (-)	22	UCGUGUCUUGUGUUGCAGCCGG	MIMAT0000216_st	MIMAT0000216	---	---
20500377	1.22311	0.0432	A	1.19409	0.00856	A	1.08035	-0.13586	A	1.17996	-0.00861	A	1.09933	-0.11073	A	1.44243	0.28115	A	1.16585	1.24057	0.939767	-0.0896248	0.561265	AA	0	miRNA	miRBase	Mus musculus	mmu-miR-188-5p	chrX:7248031-7248051 (-)	21	CAUCCCUUGCAUGGUGGAGGG	MIMAT0000217_st	MIMAT0000217	ENSMUST00000115746 // sense // intron // 3 /// ENSMUST00000128319 // sense // intron // 2 /// ENSMUST00000132126 // sense // intron // 3 /// OTTMUST00000039775 // sense // intron // 2 /// OTTMUST00000039776 // sense // intron // 3 /// OTTMUST00000039777 // sense // intron // 3	mmu-mir-188 // chrX:7247989-7248056 (-) /// mmu-mir-362 // chrX:7241982-7242046 (-) /// mmu-mir-532 // chrX:7248402-7248497 (-) /// mmu-mir-501 // chrX:7241243-7241351 (-)
20500378	1.45584	0.18467	A	1.28092	0	A	1.00608	-0.34844	A	1.04478	-0.29398	A	1.28092	0	A	1.28847	0.00848	A	1.24761	1.20472	1.0356	0.050469	0.837335	AA	0	miRNA	miRBase	Mus musculus	mmu-miR-188-3p	chrX:7247992-7248012 (-)	21	CUCCCACAUGCAGGGUUUGCA	MIMAT0004541_st	MIMAT0004541	ENSMUST00000115746 // sense // intron // 3 /// ENSMUST00000128319 // sense // intron // 2 /// ENSMUST00000132126 // sense // intron // 3 /// OTTMUST00000039775 // sense // intron // 2 /// OTTMUST00000039776 // sense // intron // 3 /// OTTMUST00000039777 // sense // intron // 3	mmu-mir-188 // chrX:7247989-7248056 (-) /// mmu-mir-362 // chrX:7241982-7242046 (-) /// mmu-mir-532 // chrX:7248402-7248497 (-) /// mmu-mir-501 // chrX:7241243-7241351 (-)
20500379	1.00044	-0.3542	A	1.27884	0	A	1.18257	-0.1129	A	1.27884	0	A	1.27884	0	A	1.52055	0.24977	A	1.15395	1.35941	0.848861	-0.2364	0.148152	AA	0	miRNA	miRBase	Mus musculus	mmu-miR-24-1-5p	chr13:63301213-63301235 (+)	23	GUGCCUACUGAGCUGAUAUCAGU	MIMAT0000218_st	MIMAT0000218	ENSMUST00000021911 // sense // intron // 15 /// ENSMUST00000159152 // sense // intron // 3 /// ENSMUST00000175000 // antisense // exon // 1 /// OTTMUST00000076332 // sense // intron // 3	mmu-mir-23b // chr13:63300484-63300557 (+) /// mmu-mir-27b // chr13:63300712-63300784 (+) /// mmu-mir-24-1 // chr13:63301208-63301275 (+) /// mmu-mir-3074-1 // chr13:63301199-63301283 (-)
20500380	212.305	1.02674	P	161.599	0.63302	P	123.342	0.24326	P	29.1056	-1.84004	P	85.065	-0.29276	P	46.7092	-1.15762	P	165.749	53.6266	3.0908	1.62798	0.0260215	PP	0	miRNA	miRBase	Mus musculus	mmu-miR-24-3p	chr13:63301251-63301272 (+) /// chr8:84208875-84208896 (+)	22	UGGCUCAGUUCAGCAGGAACAG	MIMAT0000219_st	MIMAT0000219	ENSMUST00000021911 // sense // intron // 15 /// ENSMUST00000159152 // sense // intron // 3 /// ENSMUST00000175000 // antisense // exon // 1 /// OTTMUST00000076332 // sense // intron // 3 /// ENSMUST00000180630 // sense // exon // 1 /// OTTMUST00000112758 // sense // exon // 1	mmu-mir-23b // chr13:63300484-63300557 (+) /// mmu-mir-27b // chr13:63300712-63300784 (+) /// mmu-mir-24-1 // chr13:63301208-63301275 (+) /// mmu-mir-3074-1 // chr13:63301199-63301283 (-) /// mmu-mir-23a // chr8:84208518-84208592 (+) /// mmu-mir-24-2 // chr8:84208815-84208921 (+) /// mmu-mir-27a // chr8:84208672-84208758 (+) /// mmu-mir-3074-2 // chr8:84208825-84208907 (-)
20500381	1.2299	-0.12937	A	1.14851	-0.22814	A	1.46237	0.1204	A	1.46066	0.11871	A	1.12237	-0.26136	A	1.67579	0.31694	A	1.28026	1.41961	0.901841	-0.149054	0.52836	AA	0	miRNA	miRBase	Mus musculus	mmu-miR-190a-5p	chr9:67236700-67236721 (-)	22	UGAUAUGUUUGAUAUAUUAGGU	MIMAT0000220_st	MIMAT0000220	ENSMUST00000039662 // sense // intron // 53 /// ENSMUST00000040025 // sense // intron // 53 /// ENSMUST00000102424 // sense // exon // 1	---
20500382	2.04305	-0.30089	P	1.68057	-0.58267	A	2.68287	0.09216	P	2.35083	-0.09845	P	3.3487	0.41198	P	3.02504	0.26534	P	2.1355	2.90819	0.734304	-0.44555	0.138853	PA	0	miRNA	miRBase	Mus musculus	mmu-miR-190a-3p	chr9:67236664-67236685 (-)	22	ACUAUAUAUCAAGCAUAUUCCU	MIMAT0016998_st	MIMAT0016998	ENSMUST00000039662 // sense // intron // 53 /// ENSMUST00000040025 // sense // intron // 53 /// ENSMUST00000102424 // sense // exon // 1	---
20500383	221.209	1.94643	P	29.9132	-0.94013	P	84.8758	0.56444	P	14.3315	-2.00172	P	143.705	1.32413	P	1.46066	-5.29622	A	111.999	53.1657	2.10661	1.07492	0.294215	PA	0	miRNA	miRBase	Mus musculus	mmu-miR-191-5p	chr9:108568325-108568347 (+)	23	CAACGGAAUCCCAAAAGCAGCUG	MIMAT0000221_st	MIMAT0000221	ENSMUST00000175174 // antisense // exon // 1	mmu-mir-191 // chr9:108568319-108568392 (+) /// mmu-mir-425 // chr9:108568777-108568861 (+)
20500384	1.136	-0.00695	A	1.19626	0.06763	A	1.136	-0.00695	A	1.14696	0.00691	A	0.99025	-0.20503	A	1.32847	0.21886	A	1.15609	1.15523	1.00074	0.0010736	0.934045	AA	0	miRNA	miRBase	Mus musculus	mmu-miR-191-3p	chr9:108568367-108568388 (+)	22	GCUGCACUUGGAUUUCGUUCCC	MIMAT0004542_st	MIMAT0004542	ENSMUST00000175174 // antisense // exon // 1	mmu-mir-191 // chr9:108568319-108568392 (+) /// mmu-mir-425 // chr9:108568777-108568861 (+)
20500385	1.84995	0.15289	P	1.06523	-0.64343	A	1.83851	0.14394	P	1.48935	-0.15991	A	5.04465	1.60016	P	1.08767	-0.61335	A	1.58456	2.54056	0.623707	-0.681059	0.618078	PA	0	miRNA	miRBase	Homo sapiens	hsa-miR-192-5p	chr11:64658675-64658695 (-)	21	CUGACCUAUGAAUUGACAGCC	MIMAT0000222_st	MIMAT0000222	---	hsa-mir-192 // chr11:64658609-64658718 (-) /// hsa-mir-194-2 // chr11:64658827-64658911 (-) /// hsa-mir-6750 // chr11:64665835-64665909 (-)
20500386	1.24627	0.01034	A	1.08676	-0.18724	A	1.22847	-0.01042	A	1.24627	0.01034	A	0.90282	-0.45477	A	1.24627	0.01034	A	1.18717	1.13179	1.04893	0.0689204	0.648575	AA	0	miRNA	miRBase	Homo sapiens	hsa-miR-192-3p	chr11:64658631-64658652 (-)	22	CUGCCAAUUCCAUAGGUCACAG	MIMAT0004543_st	MIMAT0004543	---	hsa-mir-192 // chr11:64658609-64658718 (-) /// hsa-mir-194-2 // chr11:64658827-64658911 (-) /// hsa-mir-6750 // chr11:64665835-64665909 (-)
20500387	4.18302	0.88385	P	1.27804	-0.82676	A	2.53581	0.16176	P	1.99789	-0.18221	P	13.6546	2.59062	P	1.19407	-0.9248	A	2.66562	5.61552	0.474689	-1.07495	0.738737	PA	0	miRNA	miRBase	Mus musculus	mmu-miR-193a-5p	chr11:79711975-79711996 (+)	22	UGGGUCUUUGCGGGCAAGAUGA	MIMAT0004544_st	MIMAT0004544	---	---
20500388	1.05048	-0.14223	A	1.09014	-0.08878	A	1.29619	0.16099	A	1.11399	-0.05755	A	1.22847	0.08357	A	1.20467	0.05535	A	1.1456	1.18238	0.968899	-0.0455821	0.64959	AA	0	miRNA	miRBase	Mus musculus	mmu-miR-193a-3p	chr11:79712009-79712030 (+)	22	AACUGGCCUACAAAGUCCCAGU	MIMAT0000223_st	MIMAT0000223	---	---
20500389	1.72365	0.40813	P	1.22847	-0.08047	A	1.1124	-0.22365	A	1.15172	-0.17355	A	3.04004	1.22676	P	1.36941	0.07622	A	1.35484	1.85372	0.730875	-0.452303	0.508813	PA	0	miRNA	miRBase	Mus musculus	mmu-miR-194-5p	chr1:185313325-185313346 (+) /// chr19:6264658-6264679 (+)	22	UGUAACAGCAACUCCAUGUGGA	MIMAT0000224_st	MIMAT0000224	ENSMUST00000027921 // antisense // intron // 12 /// ENSMUST00000110974 // antisense // intron // 12 /// ENSMUST00000110975 // antisense // intron // 12 /// OTTMUST00000051852 // antisense // intron // 12 /// OTTMUST00000051855 // antisense // intron // 12 /// OTTMUST00000051856 // antisense // intron // 12	mmu-mir-194-1 // chr1:185313319-185313385 (+) /// mmu-mir-215 // chr1:185313581-185313692 (+) /// mmu-mir-192 // chr19:6264844-6264932 (+) /// mmu-mir-194-2 // chr19:6264643-6264728 (+)
20500390	1.1869	0.06221	A	1.29545	0.18847	A	1.43531	0.33638	A	1.08671	-0.06502	A	0.95359	-0.25354	A	1.07237	-0.08419	A	1.30589	1.03756	1.25862	0.33184	0.0293288	AA	0	miRNA	miRBase	Mus musculus	mmu-miR-194-1-3p	chr1:185313360-185313381 (+)	22	CCAGUGGAGCUGCUGUUACUUC	MIMAT0016999_st	MIMAT0016999	ENSMUST00000027921 // antisense // intron // 12 /// ENSMUST00000110974 // antisense // intron // 12 /// ENSMUST00000110975 // antisense // intron // 12 /// OTTMUST00000051852 // antisense // intron // 12 /// OTTMUST00000051855 // antisense // intron // 12 /// OTTMUST00000051856 // antisense // intron // 12	mmu-mir-194-1 // chr1:185313319-185313385 (+) /// mmu-mir-215 // chr1:185313581-185313692 (+)
20500391	1.36437	0.0737	A	1.1667	-0.1521	A	1.43376	0.14527	A	1.22847	-0.07767	A	1.1667	-0.1521	A	1.36437	0.0737	A	1.32161	1.25318	1.05461	0.0767029	0.541738	AA	0	miRNA	miRBase	Mus musculus	mmu-miR-195a-5p	chr11:70235062-70235082 (+)	21	UAGCAGCACAGAAAUAUUGGC	MIMAT0000225_st	MIMAT0000225	---	mmu-mir-195a // chr11:70235042-70235135 (+) /// mmu-mir-497 // chr11:70234717-70234800 (+) /// mmu-mir-497b // chr11:70234692-70234816 (-)
20500392	1.49817	0	A	1.27368	-0.2342	A	1.49817	0	A	1.77384	0.24367	P	2.5122	0.74575	P	1.48967	-0.00821	A	1.42334	1.92524	0.739307	-0.435755	0.159741	PA	0	miRNA	miRBase	Mus musculus	mmu-miR-195a-3p	chr11:70235100-70235121 (+)	22	CCAAUAUUGGCUGUGCUGCUCC	MIMAT0017000_st	MIMAT0017000	---	mmu-mir-195a // chr11:70235042-70235135 (+) /// mmu-mir-497 // chr11:70234717-70234800 (+) /// mmu-mir-497b // chr11:70234692-70234816 (-)
20500393	0.8904	-0.27067	A	1.09184	0.02356	A	1.08961	0.02061	A	1.12142	0.06213	A	0.99949	-0.10394	A	1.0587	-0.02091	A	1.02395	1.05987	0.966109	-0.0497421	0.641979	AA	0	miRNA	miRBase	Homo sapiens	hsa-miR-196a-5p	chr12:54385546-54385567 (+) /// chr17:46709894-46709915 (-)	22	UAGGUAGUUUCAUGUUGUUGGG	MIMAT0000226_st	MIMAT0000226	ENST00000462131 // antisense // intron // 1 /// ENST00000480386 // antisense // intron // 1 /// ENST00000567101 // sense // intron // 2 /// OTTHUMT00000358089 // antisense // intron // 1 /// OTTHUMT00000358090 // antisense // intron // 1 /// OTTHUMT00000358099 // sense // intron // 2 /// ENST00000504315 // sense // intron // 1 /// ENST00000513209 // sense // intron // 1 /// OTTHUMT00000358945 // …	---
20500394	6.79374	-0.05337	P	10.0323	0.50901	P	17.1026	1.27857	P	2.27976	-1.62869	A	7.30575	0.05146	P	1.1549	-2.60981	A	11.3095	3.58014	3.15897	1.65945	0.0852699	PA	0	miRNA	miRBase	Homo sapiens	hsa-miR-197-5p	chr1:110141523-110141545 (+)	23	CGGGUAGAGAGGGCAGUGGGAGG	MIMAT0022691_st	MIMAT0022691	---	---
20500395	6.83603	1.52291	P	1.48402	-0.68074	A	1.52017	-0.64602	A	1.68463	-0.49782	A	5.6605	1.25068	P	3.07303	0.36941	P	3.28007	3.47272	0.944526	-0.082338	0.745235	PA	0	miRNA	miRBase	Homo sapiens	hsa-miR-197-3p	chr1:110141562-110141583 (+)	22	UUCACCACCUUCUCCACCCAGC	MIMAT0000227_st	MIMAT0000227	---	---
20500396	1.52009	0.34081	A	1.4145	0.23695	A	1.20957	0.01114	A	1.05476	-0.18644	A	1.19096	-0.01123	A	1.19096	-0.01123	A	1.38139	1.14556	1.20586	0.270064	0.0791069	AA	0	miRNA	miRBase	Homo sapiens	hsa-miR-198	chr3:120114550-120114571 (-)	22	GGUCCAGAGGGGAGAUAGGUUC	MIMAT0000228_st	MIMAT0000228	ENST00000295633 // sense // 3UTR // 11 /// OTTHUMT00000355399 // sense // 3UTR // 11	---
20500397	1.22847	-0.08098	A	1.24858	-0.05756	A	1.05048	-0.30679	A	1.46012	0.16825	A	1.35021	0.05535	A	1.87743	0.53092	A	1.17584	1.56259	0.752498	-0.41024	0.0713024	AA	0	miRNA	miRBase	Mus musculus	mmu-miR-199a-5p	chr1:162217844-162217866 (+) /// chr9:21496537-21496559 (-)	23	CCCAGUGUUCAGACUACCUGUUC	MIMAT0000229_st	MIMAT0000229	ENSMUST00000072362 // antisense // intron // 15 /// ENSMUST00000091087 // antisense // intron // 14 /// ENSMUST00000115404 // antisense // intron // 15 /// ENSMUST00000165766 // antisense // intron // 15 /// ENSMUST00000172482 // antisense // intron // 15 /// ENSMUST00000172763 // antisense // intron // 6 /// ENSMUST00000172833 // antisense // intron // 9 /// ENSMUST00000173299 // antisense // in…	mmu-mir-214 // chr1:162223368-162223477 (+) /// mmu-mir-199a-2 // chr1:162217814-162217923 (+)
20500398	1.32963	0.2235	A	0.98753	-0.20563	A	1.35739	0.25332	A	1.14161	0.00355	A	1.12266	-0.0206	A	1.136	-0.00356	A	1.22485	1.13342	1.08066	0.111918	0.548057	AA	0	miRNA	miRBase	Mus musculus	mmu-miR-199a-3p	chr1:162217883-162217904 (+) /// chr9:21496498-21496519 (-)	22	ACAGUAGUCUGCACAUUGGUUA	MIMAT0000230_st	MIMAT0000230	ENSMUST00000072362 // antisense // intron // 15 /// ENSMUST00000091087 // antisense // intron // 14 /// ENSMUST00000115404 // antisense // intron // 15 /// ENSMUST00000165766 // antisense // intron // 15 /// ENSMUST00000172482 // antisense // intron // 15 /// ENSMUST00000172763 // antisense // intron // 6 /// ENSMUST00000172833 // antisense // intron // 9 /// ENSMUST00000173299 // antisense // in…	mmu-mir-214 // chr1:162223368-162223477 (+) /// mmu-mir-199a-2 // chr1:162217814-162217923 (+)
20500399	1.22847	-0.08098	A	1.24858	-0.05756	A	1.05048	-0.30679	A	1.46012	0.16825	A	1.35021	0.05535	A	1.87743	0.53092	A	1.17584	1.56259	0.752498	-0.41024	0.0713024	AA	0	miRNA	miRBase	Homo sapiens	hsa-miR-199a-5p	chr1:172113732-172113754 (-) /// chr19:10928145-10928167 (-)	23	CCCAGUGUUCAGACUACCUGUUC	MIMAT0000231_st	MIMAT0000231	ENST00000314646 // antisense // intron // 15 /// ENST00000355667 // antisense // intron // 15 /// ENST00000359692 // antisense // intron // 14 /// ENST00000389253 // antisense // intron // 15 /// ENST00000408974 // antisense // intron // 14 /// ENST00000585892 // antisense // intron // 15 /// ENST00000590787 // antisense // intron // 1 /// ENST00000590806 // antisense // intron // 1 /// OTTHUMT00…	hsa-mir-199a-2 // chr1:172113675-172113784 (-) /// hsa-mir-214 // chr1:172107938-172108047 (-) /// hsa-mir-3120 // chr1:172107948-172108028 (+)
20500400	1.32963	0.2235	A	0.98753	-0.20563	A	1.35739	0.25332	A	1.14161	0.00355	A	1.12266	-0.0206	A	1.136	-0.00356	A	1.22485	1.13342	1.08066	0.111918	0.548057	AA	0	miRNA	miRBase	Homo sapiens	hsa-miR-199a-3p	chr1:172113694-172113715 (-) /// chr19:10928105-10928126 (-)	22	ACAGUAGUCUGCACAUUGGUUA	MIMAT0000232_st	MIMAT0000232	ENST00000314646 // antisense // intron // 15 /// ENST00000355667 // antisense // intron // 15 /// ENST00000359692 // antisense // intron // 14 /// ENST00000389253 // antisense // intron // 15 /// ENST00000408974 // antisense // intron // 14 /// ENST00000585892 // antisense // intron // 15 /// ENST00000590787 // antisense // intron // 1 /// ENST00000590806 // antisense // intron // 1 /// OTTHUMT00…	hsa-mir-199a-2 // chr1:172113675-172113784 (-) /// hsa-mir-214 // chr1:172107938-172108047 (-) /// hsa-mir-3120 // chr1:172107948-172108028 (+)
20500401	2.27767	0.37189	P	1.34416	-0.38896	A	2.43205	0.4665	P	1.33954	-0.39393	A	2.17606	0.30605	P	1.33954	-0.39393	A	2.01796	1.61838	1.2469	0.318347	0.434149	PA	0	miRNA	miRBase	Mus musculus	mmu-miR-200b-5p	chr4:156055721-156055742 (-)	22	CAUCUUACUGGGCAGCAUUGGA	MIMAT0004545_st	MIMAT0004545	ENSMUST00000097731 // sense // intron // 1 /// ENSMUST00000138361 // sense // intron // 1 /// OTTMUST00000025771 // sense // intron // 1 /// OTTMUST00000031955 // sense // intron // 1	mmu-mir-200b // chr4:156055681-156055750 (-) /// mmu-mir-200a // chr4:156054896-156054985 (-) /// mmu-mir-429 // chr4:156053905-156053987 (-)
20500402	1.42831	0.22707	A	1.20005	-0.02415	A	1.66519	0.44845	A	1.11737	-0.12713	A	1.06736	-0.19319	A	1.24056	0.02375	A	1.43118	1.14176	1.25349	0.325945	0.104292	AA	0	miRNA	miRBase	Mus musculus	mmu-miR-200b-3p	chr4:156055685-156055706 (-)	22	UAAUACUGCCUGGUAAUGAUGA	MIMAT0000233_st	MIMAT0000233	ENSMUST00000097731 // sense // intron // 1 /// ENSMUST00000138361 // sense // intron // 1 /// OTTMUST00000025771 // sense // intron // 1 /// OTTMUST00000031955 // sense // intron // 1	mmu-mir-200b // chr4:156055681-156055750 (-) /// mmu-mir-200a // chr4:156054896-156054985 (-) /// mmu-mir-429 // chr4:156053905-156053987 (-)
20500403	1.17597	-0.07499	A	1.136	-0.12488	A	1.57956	0.35069	A	1.23871	0	A	1.55027	0.32368	A	1.23871	0	A	1.29718	1.34256	0.966194	-0.0496152	0.771594	AA	0	miRNA	miRBase	Mus musculus	mmu-miR-201-5p	chrX:67988135-67988156 (-)	22	UACUCAGUAAGGCAUUGUUCUU	MIMAT0000234_st	MIMAT0000234	---	mmu-mir-201 // chrX:67988096-67988161 (-) /// mmu-mir-547 // chrX:67988374-67988451 (-)
20500404	1.75874	0.43998	A	1.22847	-0.07771	A	1.22872	-0.07741	A	1.36418	0.07347	A	1.21105	-0.0983	A	1.46066	0.17206	A	1.40531	1.3453	1.04461	0.0629641	0.820827	AA	0	miRNA	miRBase	Mus musculus	mmu-miR-201-3p	chrX:67988099-67988121 (-)	23	UGAACAGUGCCUUUCUGUGUAGG	MIMAT0017001_st	MIMAT0017001	---	mmu-mir-201 // chrX:67988096-67988161 (-) /// mmu-mir-547 // chrX:67988374-67988451 (-)
20500405	1.33362	-0.15757	A	1.09485	-0.44219	A	1.51947	0.03065	P	1.5732	0.08078	P	1.45559	-0.03131	P	1.75276	0.23671	P	1.31598	1.59385	0.825661	-0.276378	0.145279	PA	0	miRNA	miRBase	Mus musculus	mmu-miR-202-5p	chr7:139957732-139957752 (-)	21	UUCCUAUGCAUAUACUUCUUU	MIMAT0004546_st	MIMAT0004546	ENSMUST00000130771 // sense // exon // 2 /// ENSMUST00000134312 // antisense // intron // 3 /// ENSMUST00000139218 // antisense // intron // 1 /// OTTMUST00000078514 // sense // exon // 2 /// OTTMUST00000078515 // antisense // intron // 1 /// OTTMUST00000078516 // antisense // intron // 3	mmu-mir-202 // chr7:139957689-139957760 (-) /// mmu-mir-7686 // chr7:139957566-139957622 (-)
20500406	1.35967	0.1281	A	1.24415	0	A	1.24415	0	A	1.06389	-0.2258	A	1.24415	0	A	1.51475	0.28392	A	1.28266	1.27426	1.00659	0.0094716	0.886583	AA	0	miRNA	miRBase	Mus musculus	mmu-miR-202-3p	chr7:139957695-139957716 (-)	22	AGAGGUAUAGCGCAUGGGAAGA	MIMAT0000235_st	MIMAT0000235	ENSMUST00000130771 // sense // exon // 2 /// ENSMUST00000134312 // antisense // intron // 3 /// ENSMUST00000139218 // antisense // intron // 1 /// OTTMUST00000078514 // sense // exon // 2 /// OTTMUST00000078515 // antisense // intron // 1 /// OTTMUST00000078516 // antisense // intron // 3	mmu-mir-202 // chr7:139957689-139957760 (-) /// mmu-mir-7686 // chr7:139957566-139957622 (-)
20500407	1.18193	-0.10691	A	1.29321	0.02289	A	1.27285	0	A	1.10553	-0.20333	A	1.27285	0	A	1.44933	0.18732	A	1.24933	1.2759	0.979173	-0.0303644	0.858976	AA	0	miRNA	miRBase	Mus musculus	mmu-miR-203-5p	chr12:112130889-112130910 (+)	22	AGUGGUUCUUGACAGUUCAACA	MIMAT0004547_st	MIMAT0004547	---	---
20500408	1.52009	0.11178	P	1.39557	-0.01152	A	1.03651	-0.44065	A	1.05048	-0.42132	A	1.41795	0.01143	A	1.60649	0.19153	A	1.31739	1.35831	0.969877	-0.0441267	0.87727	PA	0	miRNA	miRBase	Mus musculus	mmu-miR-203-3p	chr12:112130927-112130948 (+)	22	GUGAAAUGUUUAGGACCACUAG	MIMAT0000236_st	MIMAT0000236	---	---
20500409	1.22847	-0.03002	A	1.14111	-0.13644	A	1.62351	0.37224	A	1.26691	0.01444	A	1.24168	-0.01458	A	1.46066	0.21975	A	1.33103	1.32308	1.00601	0.00863916	0.979858	AA	0	miRNA	miRBase	Mus musculus	mmu-miR-204-5p	chr19:22750610-22750631 (+)	22	UUCCCUUUGUCAUCCUAUGCCU	MIMAT0000237_st	MIMAT0000237	ENSMUST00000037901 // sense // intron // 6 /// ENSMUST00000074770 // sense // intron // 6 /// ENSMUST00000087576 // sense // intron // 6 /// ENSMUST00000099564 // sense // intron // 7 /// ENSMUST00000099566 // sense // intron // 6 /// ENSMUST00000099569 // sense // intron // 6	---
20500410	6.46745	1.08918	P	3.40182	0.16229	P	5.22726	0.78204	P	2.13437	-0.5102	P	2.67793	-0.18289	P	1.47479	-1.0435	A	5.03218	2.0957	2.4012	1.26375	0.0274618	PA	0	miRNA	miRBase	Mus musculus	mmu-miR-204-3p	chr19:22750649-22750669 (+)	21	GCUGGGAAGGCAAAGGGACGU	MIMAT0017002_st	MIMAT0017002	ENSMUST00000037901 // sense // intron // 6 /// ENSMUST00000074770 // sense // intron // 6 /// ENSMUST00000087576 // sense // intron // 6 /// ENSMUST00000099564 // sense // intron // 7 /// ENSMUST00000099566 // sense // intron // 6 /// ENSMUST00000099569 // sense // intron // 6	---
20500411	1.94288	0.5273	A	1.21513	-0.14979	A	1.18208	-0.18956	A	1.22847	-0.13403	A	1.6994	0.33413	A	1.46767	0.12263	A	1.4467	1.46518	0.987385	-0.0183155	0.875525	AA	0	miRNA	miRBase	Mus musculus	mmu-miR-205-5p	chr1:193507503-193507524 (-)	22	UCCUUCAUUCCACCGGAGUCUG	MIMAT0000238_st	MIMAT0000238	ENSMUST00000180420 // sense // exon // 2 /// OTTMUST00000112665 // sense // exon // 2	---
20500412	1.23586	0	A	1.23586	0	P	1.23586	0	A	1.23586	0	A	1.21381	-0.02598	A	1.23586	0	A	1.23586	1.22851	1.00598	0.00860572	0.373901	PA	0	miRNA	miRBase	Mus musculus	mmu-miR-205-3p	chr1:193507467-193507488 (-)	22	GAUUUCAGUGGAGUGAAGCUCA	MIMAT0017003_st	MIMAT0017003	ENSMUST00000180420 // sense // exon // 2 /// OTTMUST00000112665 // sense // exon // 2	---
20500413	1.17291	0.00569	A	1.16368	-0.00571	A	0.87442	-0.418	A	1.39724	0.25817	A	1.17291	0.00569	A	1.16368	-0.00571	A	1.07034	1.24461	0.859978	-0.217629	0.24091	AA	0	miRNA	miRBase	Mus musculus	mmu-miR-206-5p	chr1:20679017-20679039 (+)	23	ACAUGCUUCUUUAUAUCCUCAUA	MIMAT0017004_st	MIMAT0017004	---	mmu-mir-206 // chr1:20679010-20679082 (+) /// mmu-mir-133b // chr1:20682769-20682887 (+)
20500414	1.48318	-0.00674	A	1.55427	0.0608	A	1.49708	0.00671	A	1.59214	0.09553	A	1.21343	-0.29634	A	1.22847	-0.27858	A	1.51151	1.34468	1.12407	0.168728	0.236551	AA	0	miRNA	miRBase	Mus musculus	mmu-miR-206-3p	chr1:20679055-20679076 (+)	22	UGGAAUGUAAGGAAGUGUGUGG	MIMAT0000239_st	MIMAT0000239	---	mmu-mir-206 // chr1:20679010-20679082 (+) /// mmu-mir-133b // chr1:20682769-20682887 (+)
20500415	1.31044	-0.29524	A	1.6824	0.06523	A	2.2054	0.45575	A	1.27957	-0.32964	A	1.53366	-0.06832	A	1.93899	0.27001	A	1.73275	1.58407	1.09386	0.129422	0.693079	AA	0	miRNA	miRBase	Mus musculus	mmu-miR-207	chr4:40722968-40722990 (+)	23	GCUUCUCCUGGCUCUCCUCCCUC	MIMAT0000240_st	MIMAT0000240	ENSMUST00000030118 // sense // intron // 1 /// ENSMUST00000125442 // sense // 3UTR // 1 /// ENSMUST00000129204 // sense // exon // 1 /// ENSMUST00000137246 // sense // 3UTR // 1 /// ENSMUST00000137476 // sense // intron // 1 /// ENSMUST00000139406 // sense // intron // 1 /// ENSMUST00000164233 // sense // 3UTR // 1 /// OTTMUST00000015000 // sense // intron // 1 /// OTTMUST00000015001 // sense // …	---
20500416	2.25017	0.92852	P	1.00877	-0.22891	A	1.22847	0.05535	A	1.32726	0.16694	A	1.136	-0.05755	A	0.98628	-0.26144	A	1.4958	1.14985	1.30087	0.379479	0.459234	PA	0	miRNA	miRBase	Homo sapiens	hsa-miR-208a-5p	chr14:23857846-23857867 (-)	22	GAGCUUUUGGCCCGGGUUAUAC	MIMAT0026474_st	MIMAT0026474	ENST00000356287 // sense // intron // 28 /// ENST00000362287 // sense // exon // 1 /// ENST00000405093 // sense // intron // 29 /// OTTHUMT00000071796 // sense // intron // 28	---
20500417	1.35967	-0.11485	A	1.83851	0.32042	P	1.46066	-0.01149	A	1.71047	0.21628	A	1.48402	0.0114	A	1.46066	-0.01149	A	1.55295	1.55172	1.00079	0.00114313	0.963149	PA	0	miRNA	miRBase	Homo sapiens	hsa-miR-208a-3p	chr14:23857811-23857832 (-)	22	AUAAGACGAGCAAAAAGCUUGU	MIMAT0000241_st	MIMAT0000241	ENST00000356287 // sense // intron // 28 /// ENST00000362287 // sense // exon // 1 /// ENST00000405093 // sense // intron // 29 /// OTTHUMT00000071796 // sense // intron // 28	---
20500418	1.24415	0.01372	A	1.2207	-0.01373	A	1.23628	0.00457	A	1.46996	0.25433	A	1.21298	-0.02288	A	1.22847	-0.00458	A	1.23371	1.3038	0.946239	-0.079723	0.455962	AA	0	miRNA	miRBase	Homo sapiens	hsa-miR-129-5p	chr11:43602958-43602978 (+) /// chr7:127847929-127847949 (+)	21	CUUUUUGCGGUCUGGGCUUGC	MIMAT0000242_st	MIMAT0000242	ENST00000384972 // sense // exon // 1 /// ENST00000526615 // sense // intron // 2 /// ENST00000532864 // sense // intron // 1 /// ENST00000533358 // sense // intron // 1 /// OTTHUMT00000389683 // sense // intron // 2 /// OTTHUMT00000389684 // sense // intron // 1 /// OTTHUMT00000389685 // sense // intron // 1	---
20500419	1.32727	0.02763	A	1.7947	0.4629	A	1.27466	-0.03072	A	1.27692	-0.02817	A	1.27466	-0.03072	A	1.47018	0.17516	A	1.46554	1.34059	1.09321	0.128571	0.537507	AA	0	miRNA	miRBase	Homo sapiens	hsa-miR-129-1-3p	chr7:127847973-127847994 (+)	22	AAGCCCUUACCCCAAAAAGUAU	MIMAT0004548_st	MIMAT0004548	ENST00000384972 // sense // exon // 1	---
20500420	0.91239	-0.41021	A	1.05948	-0.19458	A	1.21246	0	A	1.21246	0	A	1.39723	0.20463	A	1.44164	0.24977	A	1.06144	1.35044	0.785996	-0.347406	0.0667471	AA	0	miRNA	miRBase	Homo sapiens	hsa-miR-148a-5p	chr7:25989580-25989601 (-)	22	AAAGUUCUGAGACACUCCGACU	MIMAT0004549_st	MIMAT0004549	---	---
20500421	1.26737	0.08378	A	0.97917	-0.28842	A	0.91239	-0.39032	A	1.16326	-0.03988	A	1.22847	0.03881	A	1.36035	0.18592	A	1.05298	1.25069	0.841914	-0.248255	0.17647	AA	0	miRNA	miRBase	Homo sapiens	hsa-miR-148a-3p	chr7:25989542-25989563 (-)	22	UCAGUGCACUACAGAACUUUGU	MIMAT0000243_st	MIMAT0000243	---	---
20500422	1.85834	0.42859	P	1.58672	0.20062	A	1.06022	-0.38106	A	1.17473	-0.2331	A	2.88509	1.06319	P	1.12996	-0.28916	A	1.50176	1.72993	0.868106	-0.204057	0.855677	PA	0	miRNA	miRBase	Homo sapiens	hsa-miR-30c-5p	chr1:41222972-41222994 (+) /// chr6:72086706-72086728 (-)	23	UGUAAACAUCCUACACUCUCAGC	MIMAT0000244_st	MIMAT0000244	ENST00000413945 // sense // intron // 3 /// ENST00000436803 // sense // intron // 3 /// ENST00000602823 // sense // intron // 2 /// OTTHUMT00000041155 // sense // intron // 3 /// OTTHUMT00000041167 // sense // intron // 3 /// OTTHUMT00000467928 // sense // intron // 2 /// ENST00000308733 // sense // intron // 4 /// ENST00000372651 // sense // intron // 5 /// ENST00000372652 // sense // intron // …	hsa-mir-30c-1 // chr1:41222956-41223044 (+) /// hsa-mir-30e // chr1:41220027-41220118 (+)
20500423	1.19859	-0.02696	A	1.19042	-0.03682	A	1.45454	0.25227	A	1.2438	0.02647	A	1.73694	0.50825	A	1.0803	-0.17686	A	1.28118	1.35368	0.946445	-0.0794098	0.813563	AA	0	miRNA	miRBase	Homo sapiens	hsa-miR-30c-2-3p	chr6:72086667-72086688 (-)	22	CUGGGAGAAGGCUGUUUACUCU	MIMAT0004550_st	MIMAT0004550	ENST00000413945 // sense // intron // 3 /// ENST00000436803 // sense // intron // 3 /// ENST00000602823 // sense // intron // 2 /// OTTHUMT00000041155 // sense // intron // 3 /// OTTHUMT00000041167 // sense // intron // 3 /// OTTHUMT00000467928 // sense // intron // 2	---
20500424	17.0359	3.30602	P	1.48402	-0.21497	A	1.75144	0.02406	P	1.43847	-0.25995	A	5.42784	1.65589	P	1.69351	-0.02447	A	6.75712	2.85327	2.3682	1.24379	0.674762	PA	0	miRNA	miRBase	Homo sapiens	hsa-miR-30d-5p	chr8:135817162-135817183 (-)	22	UGUAAACAUCCCCGACUGGAAG	MIMAT0000245_st	MIMAT0000245	---	hsa-mir-30d // chr8:135817119-135817188 (-) /// hsa-mir-30b // chr8:135812763-135812850 (-)
20500425	1.14353	-0.10336	A	1.22847	0	A	1.30669	0.08906	A	1.22847	0	A	1.22847	0	A	1.22847	0	A	1.22623	1.22847	0.998177	-0.00263302	0.935798	AA	0	miRNA	miRBase	Homo sapiens	hsa-miR-30d-3p	chr8:135817122-135817143 (-)	22	CUUUCAGUCAGAUGUUUGCUGC	MIMAT0004551_st	MIMAT0004551	---	hsa-mir-30d // chr8:135817119-135817188 (-) /// hsa-mir-30b // chr8:135812763-135812850 (-)
20500426	2.39632	-0.59087	P	32.4847	3.17	P	3.47785	-0.05349	P	18.1642	2.33134	P	3.74059	0.05158	P	2.93715	-0.29727	P	12.7863	8.28064	1.54412	0.626784	0.923497	PP	0	miRNA	miRBase	Mus musculus	mmu-miR-122-5p	chr18:65248866-65248887 (+)	22	UGGAGUGUGACAAUGGUGUUUG	MIMAT0000246_st	MIMAT0000246	---	---
20500427	1.20666	-0.05168	A	1.25067	0	A	1.25067	0	A	1.25067	0	A	1.25067	0	A	1.29628	0.05168	A	1.236	1.26587	0.976401	-0.0344543	0.2302	AA	0	miRNA	miRBase	Mus musculus	mmu-miR-122-3p	chr18:65248901-65248920 (+)	20	AAACGCCAUUAUCACACUAA	MIMAT0017005_st	MIMAT0017005	---	---
20500428	1.30611	0.07468	A	0.98677	-0.3298	A	1.30036	0.06832	A	1.18007	-0.07172	A	1.1662	-0.08878	A	1.30036	0.06832	A	1.19775	1.21554	0.985359	-0.0212785	0.835943	AA	0	miRNA	miRBase	Mus musculus	mmu-miR-143-5p	chr18:61649233-61649253 (-)	21	GGUGCAGUGCUGCAUCUCUGG	MIMAT0017006_st	MIMAT0017006	---	mmu-mir-145a // chr18:61647825-61647894 (-) /// mmu-mir-143 // chr18:61649196-61649258 (-)
20500429	1.70883	0.49592	P	1.17718	-0.04175	A	1.24631	0.04058	A	1.17718	-0.04175	A	1.58835	0.39044	A	1.03069	-0.23348	A	1.37744	1.26541	1.08854	0.122388	0.638137	PA	0	miRNA	miRBase	Mus musculus	mmu-miR-143-3p	chr18:61649199-61649219 (-)	21	UGAGAUGAAGCACUGUAGCUC	MIMAT0000247_st	MIMAT0000247	---	mmu-mir-145a // chr18:61647825-61647894 (-) /// mmu-mir-143 // chr18:61649196-61649258 (-)
20500430	1.136	0	A	1.01385	-0.16411	A	1.136	0	A	1.23871	0.12488	A	1.136	0	A	1.136	0	A	1.09528	1.17024	0.93595	-0.0954962	0.233723	AA	0	miRNA	miRBase	Mus musculus	mmu-miR-30e-5p	chr4:120772660-120772681 (-)	22	UGUAAACAUCCUUGACUGGAAG	MIMAT0000248_st	MIMAT0000248	ENSMUST00000043429 // sense // intron // 5 /// ENSMUST00000097906 // sense // intron // 4 /// ENSMUST00000118902 // sense // intron // 5 /// ENSMUST00000120779 // sense // intron // 5 /// ENSMUST00000134979 // sense // intron // 3 /// ENSMUST00000136236 // sense // intron // 4 /// OTTMUST00000020128 // sense // intron // 5 /// OTTMUST00000020129 // sense // intron // 5 /// OTTMUST00000020130 // s…	mmu-mir-30e // chr4:120772606-120772697 (-) /// mmu-mir-30c-1 // chr4:120769534-120769622 (-) /// mmu-mir-30f // chr4:120772606-120772697 (+)
20500431	1.02461	-0.09724	A	0.89563	-0.29134	A	1.1675	0.0911	A	1.1675	0.0911	A	1.30974	0.25696	A	0.98526	-0.15374	A	1.02925	1.15417	0.891766	-0.165263	0.370228	AA	0	miRNA	miRBase	Mus musculus	mmu-miR-30e-3p	chr4:120772618-120772639 (-)	22	CUUUCAGUCGGAUGUUUACAGC	MIMAT0000249_st	MIMAT0000249	ENSMUST00000043429 // sense // intron // 5 /// ENSMUST00000097906 // sense // intron // 4 /// ENSMUST00000118902 // sense // intron // 5 /// ENSMUST00000120779 // sense // intron // 5 /// ENSMUST00000134979 // sense // intron // 3 /// ENSMUST00000136236 // sense // intron // 4 /// OTTMUST00000020128 // sense // intron // 5 /// OTTMUST00000020129 // sense // intron // 5 /// OTTMUST00000020130 // s…	mmu-mir-30e // chr4:120772606-120772697 (-) /// mmu-mir-30c-1 // chr4:120769534-120769622 (-) /// mmu-mir-30f // chr4:120772606-120772697 (+)
20500432	2.28184	0.86158	P	1.16008	-0.11439	A	1.16008	-0.11439	A	1.11221	-0.17519	A	2.30075	0.87349	P	1.35154	0.10599	A	1.534	1.58817	0.965894	-0.0500638	0.905404	PA	0	miRNA	miRBase	Homo sapiens	hsa-miR-139-5p	chr11:72326146-72326168 (-)	23	UCUACAGUGCACGUGUCUCCAGU	MIMAT0000250_st	MIMAT0000250	ENST00000334456 // sense // intron // 2 /// ENST00000376450 // sense // intron // 1 /// ENST00000418754 // sense // intron // 2 /// ENST00000444035 // sense // intron // 2 /// ENST00000485058 // sense // intron // 3 /// ENST00000535701 // sense // intron // 2 /// ENST00000536308 // sense // intron // 1 /// ENST00000537631 // sense // intron // 2 /// ENST00000538749 // sense // intron // 3 /// ENS…	---
20500433	1.46112	-0.05192	A	1.5682	0.05012	A	1.29814	-0.22254	A	1.69625	0.16336	A	1.65709	0.12967	A	1.37173	-0.14299	A	1.44249	1.57502	0.915851	-0.126815	0.376093	AA	0	miRNA	miRBase	Homo sapiens	hsa-miR-139-3p	chr11:72326110-72326132 (-)	23	UGGAGACGCGGCCCUGUUGGAGU	MIMAT0004552_st	MIMAT0004552	ENST00000334456 // sense // intron // 2 /// ENST00000376450 // sense // intron // 1 /// ENST00000418754 // sense // intron // 2 /// ENST00000444035 // sense // intron // 2 /// ENST00000485058 // sense // intron // 3 /// ENST00000535701 // sense // intron // 2 /// ENST00000536308 // sense // intron // 1 /// ENST00000537631 // sense // intron // 2 /// ENST00000538749 // sense // intron // 3 /// ENS…	---
20500434	1.15786	-0.10037	A	1.05048	-0.24078	A	1.46066	0.23479	A	1.24386	0.00299	A	1.48711	0.26067	A	1.23871	-0.003	A	1.223	1.32323	0.924256	-0.113636	0.501257	AA	0	miRNA	miRBase	Homo sapiens	hsa-miR-147a	chr9:123007263-123007282 (-)	20	GUGUGUGGAAAUGCUUCUGC	MIMAT0000251_st	MIMAT0000251	---	---
20500435	1.17643	-0.24977	A	1.41554	0.01717	P	1.39879	0	A	1.57302	0.16935	A	1.22847	-0.18732	A	1.39879	0	A	1.33025	1.40009	0.950118	-0.073822	0.622596	PA	0	miRNA	miRBase	Homo sapiens	hsa-miR-7-5p	chr15:89155087-89155109 (+) /// chr19:4770712-4770734 (+) /// chr9:86584727-86584749 (-)	23	UGGAAGACUAGUGAUUUUGUUGU	MIMAT0000252_st	MIMAT0000252	ENST00000351839 // sense // intron // 15 /// ENST00000360384 // sense // intron // 16 /// ENST00000376263 // sense // intron // 16 /// ENST00000376264 // sense // intron // 16 /// ENST00000376281 // sense // intron // 16 /// ENST00000481820 // sense // 3UTR // 4 /// ENST00000492865 // sense // intron // 3 /// ENST00000493362 // sense // intron // 1 /// OTTHUMT00000052846 // sense // intron // 16 …	hsa-mir-7-2 // chr15:89155056-89155165 (+) /// hsa-mir-1179 // chr15:89151338-89151428 (+) /// hsa-mir-3529 // chr15:89155078-89155155 (-)
20500436	1.38148	0.16935	A	1.22847	0	A	0.91239	-0.42913	A	1.22847	0	A	1.22847	0	A	1.22847	0	A	1.17411	1.22847	0.955753	-0.065291	0.652277	AA	0	miRNA	miRBase	Homo sapiens	hsa-miR-7-1-3p	chr9:86584686-86584707 (-)	22	CAACAAAUCACAGUCUGCCAUA	MIMAT0004553_st	MIMAT0004553	ENST00000351839 // sense // intron // 15 /// ENST00000360384 // sense // intron // 16 /// ENST00000376263 // sense // intron // 16 /// ENST00000376264 // sense // intron // 16 /// ENST00000376281 // sense // intron // 16 /// ENST00000481820 // sense // 3UTR // 4 /// ENST00000492865 // sense // intron // 3 /// ENST00000493362 // sense // intron // 1 /// OTTHUMT00000052846 // sense // intron // 16 …	---
20500437	1.32561	0	A	1.32561	0	A	1.22847	-0.1098	A	1.15136	-0.20333	A	1.32561	0	A	1.32561	0	A	1.29323	1.26753	1.02028	0.0289628	0.706391	AA	0	miRNA	miRBase	Homo sapiens	hsa-miR-7-2-3p	chr15:89155127-89155148 (+)	22	CAACAAAUCCCAGUCUACCUAA	MIMAT0004554_st	MIMAT0004554	---	hsa-mir-7-2 // chr15:89155056-89155165 (+) /// hsa-mir-1179 // chr15:89151338-89151428 (+) /// hsa-mir-3529 // chr15:89155078-89155155 (-)
20500438	1.62636	0.19124	P	1.55679	0.12817	A	1.08671	-0.39044	A	1.29211	-0.14067	A	1.18649	-0.26371	A	1.85811	0.38343	P	1.42329	1.44557	0.984585	-0.0224122	0.9538	PA	0	miRNA	miRBase	Homo sapiens	hsa-miR-10a-5p	chr17:46657266-46657288 (-)	23	UACCCUGUAGAUCCGAAUUUGUG	MIMAT0000253_st	MIMAT0000253	ENST00000332503 // sense // 5UTR // 1 /// ENST00000460160 // sense // intron // 1 /// ENST00000465846 // antisense // intron // 2 /// ENST00000472863 // sense // intron // 1 /// ENST00000476342 // sense // intron // 1 /// ENST00000489475 // sense // intron // 1 /// ENST00000498678 // sense // intron // 1 /// ENST00000548801 // sense // exon // 1 /// ENST00000552000 // sense // intron // 1 /// OTT…	---
20500439	1.05048	-0.01463	A	1.22847	0.21118	A	1.05048	-0.01463	A	1.07189	0.01448	A	1.22847	0.21118	A	1.05048	-0.01463	A	1.10981	1.11695	0.993611	-0.00924759	0.929764	AA	0	miRNA	miRBase	Homo sapiens	hsa-miR-10a-3p	chr17:46657226-46657247 (-)	22	CAAAUUCGUAUCUAGGGGAAUA	MIMAT0004555_st	MIMAT0004555	ENST00000332503 // sense // 5UTR // 1 /// ENST00000460160 // sense // intron // 1 /// ENST00000465846 // antisense // intron // 2 /// ENST00000472863 // sense // intron // 1 /// ENST00000476342 // sense // intron // 1 /// ENST00000489475 // sense // intron // 1 /// ENST00000498678 // sense // intron // 1 /// ENST00000548801 // sense // exon // 1 /// ENST00000552000 // sense // intron // 1 /// OTT…	---
20500440	1.35967	0.0732	P	1.22847	-0.0732	A	1.06638	-0.27734	A	1.43579	0.15179	A	1.29241	0	P	1.29241	0	A	1.21817	1.3402	0.908947	-0.137732	0.276241	PA	0	miRNA	miRBase	Homo sapiens	hsa-miR-10b-5p	chr2:177015057-177015079 (+)	23	UACCCUGUAGAACCGAAUUUGUG	MIMAT0000254_st	MIMAT0000254	ENST00000432796 // sense // intron // 1 /// ENST00000468418 // sense // 3UTR // 1 /// OTTHUMT00000334246 // sense // 3UTR // 1 /// OTTHUMT00000334248 // sense // intron // 1	---
20500441	1.22847	0	A	1.22847	0	A	1.22847	0	A	0.91239	-0.42913	A	1.29933	0.08091	A	1.56937	0.35333	A	1.22847	1.26036	0.974695	-0.0369771	0.994437	AA	0	miRNA	miRBase	Homo sapiens	hsa-miR-10b-3p	chr2:177015096-177015117 (+)	22	ACAGAUUCGAUUCUAGGGGAAU	MIMAT0004556_st	MIMAT0004556	ENST00000432796 // sense // intron // 1 /// ENST00000468418 // sense // 3UTR // 1 /// OTTHUMT00000334246 // sense // 3UTR // 1 /// OTTHUMT00000334248 // sense // intron // 1	---
20500442	1.08141	-0.18395	A	1.30203	0.0839	A	1.03913	-0.24148	A	1.28561	0.0656	A	1.22847	0	A	1.22847	0	A	1.14086	1.24752	0.914502	-0.128942	0.256545	AA	0	miRNA	miRBase	Homo sapiens	hsa-miR-34a-5p	chr1:9211794-9211815 (-)	22	UGGCAGUGUCUUAGCUGGUUGU	MIMAT0000255_st	MIMAT0000255	---	---
20500443	1.24336	0.00419	A	1.23614	-0.00421	A	1.44558	0.2216	A	1.05048	-0.23899	A	1.1381	-0.12343	A	1.46613	0.24197	A	1.30836	1.21824	1.07398	0.102965	0.522093	AA	0	miRNA	miRBase	Homo sapiens	hsa-miR-34a-3p	chr1:9211752-9211773 (-)	22	CAAUCAGCAAGUAUACUGCCCU	MIMAT0004557_st	MIMAT0004557	---	---
20500444	10.6716	2.70251	P	1.12806	-0.53935	A	2.08661	0.34797	P	1.19224	-0.45951	A	8.35401	2.34928	P	1.05048	-0.64214	A	4.62876	3.53224	1.31043	0.39004	0.77363	PA	0	miRNA	miRBase	Homo sapiens	hsa-miR-181a-5p	chr1:198828237-198828259 (-) /// chr9:127454759-127454781 (+)	23	AACAUUCAACGCUGUCGGUGAGU	MIMAT0000256_st	MIMAT0000256	ENST00000344523 // antisense // intron // 2 /// ENST00000373584 // antisense // intron // 2 /// ENST00000416460 // antisense // intron // 2 /// ENST00000429139 // sense // intron // 1 /// ENST00000487099 // antisense // intron // 2 /// OTTHUMT00000054033 // sense // intron // 1 /// OTTHUMT00000054043 // antisense // intron // 2 /// OTTHUMT00000356283 // antisense // intron // 2 /// OTTHUMT0000035…	hsa-mir-181a-2 // chr9:127454721-127454830 (+) /// hsa-mir-181b-2 // chr9:127455989-127456077 (+) /// hsa-mir-181b-1 // chr1:198828002-198828111 (-) /// hsa-mir-181a-1 // chr1:198828173-198828282 (-)
20500445	1.22847	0.12783	A	1.1243	0	A	1.1243	0	A	1.11132	-0.01675	A	1.07246	-0.0681	A	1.1243	0	A	1.15902	1.10269	1.05108	0.071878	0.208131	AA	0	miRNA	miRBase	Homo sapiens	hsa-miR-181a-2-3p	chr9:127454797-127454818 (+)	22	ACCACUGACCGUUGACUGUACC	MIMAT0004558_st	MIMAT0004558	ENST00000344523 // antisense // intron // 2 /// ENST00000373584 // antisense // intron // 2 /// ENST00000416460 // antisense // intron // 2 /// ENST00000429139 // sense // intron // 1 /// ENST00000487099 // antisense // intron // 2 /// OTTHUMT00000054033 // sense // intron // 1 /// OTTHUMT00000054043 // antisense // intron // 2 /// OTTHUMT00000356283 // antisense // intron // 2 /// OTTHUMT0000035…	hsa-mir-181a-2 // chr9:127454721-127454830 (+) /// hsa-mir-181b-2 // chr9:127455989-127456077 (+)
20500446	1.79472	0.1257	A	1.22847	-0.42119	A	1.60928	-0.03164	A	1.68064	0.03096	A	2.07546	0.33538	P	1.3866	-0.2465	A	1.54416	1.71423	0.900786	-0.150744	0.558592	PA	0	miRNA	miRBase	Homo sapiens	hsa-miR-181b-5p	chr1:198828054-198828076 (-) /// chr9:127456004-127456026 (+)	23	AACAUUCAUUGCUGUCGGUGGGU	MIMAT0000257_st	MIMAT0000257	ENST00000432296 // sense // intron // 2 /// OTTHUMT00000087434 // sense // intron // 2 /// ENST00000344523 // antisense // intron // 2 /// ENST00000373584 // antisense // intron // 2 /// ENST00000416460 // antisense // intron // 2 /// ENST00000429139 // sense // intron // 1 /// ENST00000487099 // antisense // intron // 2 /// OTTHUMT00000054033 // sense // intron // 1 /// OTTHUMT00000054043 // ant…	hsa-mir-181b-1 // chr1:198828002-198828111 (-) /// hsa-mir-181a-1 // chr1:198828173-198828282 (-) /// hsa-mir-181a-2 // chr9:127454721-127454830 (+) /// hsa-mir-181b-2 // chr9:127455989-127456077 (+)
20500447	1.25503	0.07135	A	1.28971	0.11067	A	1.13392	-0.07506	A	1.01572	-0.23388	A	1.01572	-0.23388	A	1.5145	0.34246	P	1.22622	1.18198	1.03743	0.0530122	0.718736	PA	0	miRNA	miRBase	Homo sapiens	hsa-miR-181b-3p	chr1:198828016-198828036 (-)	21	CUCACUGAACAAUGAAUGCAA	MIMAT0022692_st	MIMAT0022692	ENST00000432296 // sense // intron // 2 /// OTTHUMT00000087434 // sense // intron // 2	hsa-mir-181b-1 // chr1:198828002-198828111 (-) /// hsa-mir-181a-1 // chr1:198828173-198828282 (-)
20500448	1.38095	0.20695	A	1.24769	0.06054	A	1.1707	-0.03134	A	1.05445	-0.18222	A	1.08924	-0.1354	A	1.22212	0.03068	A	1.26645	1.12194	1.1288	0.174795	0.139712	AA	0	miRNA	miRBase	Homo sapiens	hsa-miR-181c-5p	chr19:13985539-13985560 (+)	22	AACAUUCAACCUGUCGGUGAGU	MIMAT0000258_st	MIMAT0000258	ENST00000591161 // sense // intron // 1 /// ENST00000591727 // sense // intron // 1 /// OTTHUMT00000457943 // sense // intron // 1 /// OTTHUMT00000457944 // sense // intron // 1	hsa-mir-181c // chr19:13985513-13985622 (+) /// hsa-mir-181d // chr19:13985689-13985825 (+)
20500449	1.136	0	A	1.01017	-0.16935	A	1.136	0	A	1.136	0	A	1.136	0	A	1.136	0	A	1.09406	1.136	0.963078	-0.0542754	0.373901	AA	0	miRNA	miRBase	Homo sapiens	hsa-miR-181c-3p	chr19:13985577-13985598 (+)	22	AACCAUCGACCGUUGAGUGGAC	MIMAT0004559_st	MIMAT0004559	ENST00000591161 // sense // intron // 1 /// ENST00000591727 // sense // intron // 1 /// OTTHUMT00000457943 // sense // intron // 1 /// OTTHUMT00000457944 // sense // intron // 1	hsa-mir-181c // chr19:13985513-13985622 (+) /// hsa-mir-181d // chr19:13985689-13985825 (+)
20500450	1.27845	0.05753	A	1.22847	0	A	1.22847	0	A	1.22847	0	A	1.22847	0	A	1.22847	0	A	1.24513	1.22847	1.01356	0.0194338	0.373901	AA	0	miRNA	miRBase	Homo sapiens	hsa-miR-182-5p	chr7:129410287-129410310 (-)	24	UUUGGCAAUGGUAGAACUCACACU	MIMAT0000259_st	MIMAT0000259	---	hsa-mir-96 // chr7:129414532-129414609 (-) /// hsa-mir-182 // chr7:129410223-129410332 (-) /// hsa-mir-183 // chr7:129414745-129414854 (-)
20500451	1.05774	-0.01636	A	1.08186	0.01617	A	1.22369	0.1939	A	1.24064	0.21375	A	1.05774	-0.01636	A	1.05048	-0.02628	A	1.1211	1.11629	1.00431	0.00620312	0.944693	AA	0	miRNA	miRBase	Homo sapiens	hsa-miR-182-3p	chr7:129410246-129410266 (-)	21	UGGUUCUAGACUUGCCAACUA	MIMAT0000260_st	MIMAT0000260	---	hsa-mir-96 // chr7:129414532-129414609 (-) /// hsa-mir-182 // chr7:129410223-129410332 (-) /// hsa-mir-183 // chr7:129414745-129414854 (-)
20500452	1.0575	0.08065	A	1.2998	0.37828	A	0.93042	-0.10405	A	0.93042	-0.10405	A	0.94251	-0.08542	A	1.46066	0.54662	A	1.09591	1.1112	0.98624	-0.0199892	0.997786	AA	0	miRNA	miRBase	Homo sapiens	hsa-miR-183-5p	chr7:129414807-129414828 (-)	22	UAUGGCACUGGUAGAAUUCACU	MIMAT0000261_st	MIMAT0000261	---	hsa-mir-96 // chr7:129414532-129414609 (-) /// hsa-mir-182 // chr7:129410223-129410332 (-) /// hsa-mir-183 // chr7:129414745-129414854 (-)
20500453	1.32847	0.16825	A	1.136	-0.05755	A	1.22847	0.05535	A	1.136	-0.05755	A	1.07124	-0.14223	A	1.22847	0.05535	A	1.23098	1.14524	1.07487	0.104162	0.298753	AA	0	miRNA	miRBase	Homo sapiens	hsa-miR-183-3p	chr7:129414768-129414789 (-)	22	GUGAAUUACCGAAGGGCCAUAA	MIMAT0004560_st	MIMAT0004560	---	hsa-mir-96 // chr7:129414532-129414609 (-) /// hsa-mir-182 // chr7:129410223-129410332 (-) /// hsa-mir-183 // chr7:129414745-129414854 (-)
20500454	2.25873	0.18937	A	1.23315	-0.68379	A	2.45515	0.30967	A	1.70303	-0.21804	A	7.79085	1.97564	P	1.70303	-0.21804	A	1.98234	3.7323	0.531131	-0.912859	0.509909	PA	0	miRNA	miRBase	Homo sapiens	hsa-miR-187-5p	chr18:33484834-33484855 (-)	22	GGCUACAACACAGGACCCGGGC	MIMAT0004561_st	MIMAT0004561	---	---
20500455	1.29241	0.0732	A	1.22847	0	A	1.05048	-0.2258	A	1.16769	-0.0732	A	1.22847	0	A	1.26003	0.0366	A	1.19045	1.21873	0.976798	-0.0338675	0.706559	AA	0	miRNA	miRBase	Homo sapiens	hsa-miR-187-3p	chr18:33484798-33484819 (-)	22	UCGUGUCUUGUGUUGCAGCCGG	MIMAT0000262_st	MIMAT0000262	---	---
20500456	0.96851	-0.24237	A	1.15166	0.00751	A	1.13971	-0.00755	A	1.5505	0.43652	A	0.99497	-0.20348	A	1.30402	0.18675	A	1.08663	1.28316	0.846834	-0.239848	0.338105	AA	0	miRNA	miRBase	Homo sapiens	hsa-miR-196a-3p	chr12:54385583-54385604 (+)	22	CGGCAACAAGAAACUGCCUGAG	MIMAT0004562_st	MIMAT0004562	ENST00000504315 // sense // intron // 1 /// ENST00000513209 // sense // intron // 1 /// OTTHUMT00000358945 // sense // intron // 1 /// OTTHUMT00000358949 // sense // intron // 1	---
20500457	1.136	-0.09544	A	1.37232	0.17722	A	0.99471	-0.28705	A	1.14526	-0.08372	A	1.28211	0.07913	A	1.2879	0.08563	A	1.16768	1.23842	0.942874	-0.0848637	0.548087	AA	0	miRNA	miRBase	Homo sapiens	hsa-miR-199b-5p	chr9:131007062-131007084 (-)	23	CCCAGUGUUUAGACUAUCUGUUC	MIMAT0000263_st	MIMAT0000263	ENST00000341179 // antisense // intron // 15 /// ENST00000372923 // antisense // intron // 15 /// ENST00000393594 // antisense // intron // 15 /// ENST00000441149 // antisense // intron // 14 /// ENST00000475805 // antisense // intron // 15 /// ENST00000479174 // antisense // intron // 2 /// ENST00000486160 // antisense // intron // 15 /// ENST00000493925 // antisense // intron // 2 /// OTTHUMT00…	hsa-mir-199b // chr9:131007000-131007109 (-) /// hsa-mir-3154 // chr9:131007226-131007309 (-)
20500458	1.32963	0.2235	A	0.98753	-0.20563	A	1.35739	0.25332	A	1.14161	0.00355	A	1.12266	-0.0206	A	1.136	-0.00356	A	1.22485	1.13342	1.08066	0.111918	0.548057	AA	0	miRNA	miRBase	Homo sapiens	hsa-miR-199b-3p	chr9:131007024-131007045 (-)	22	ACAGUAGUCUGCACAUUGGUUA	MIMAT0004563_st	MIMAT0004563	ENST00000341179 // antisense // intron // 15 /// ENST00000372923 // antisense // intron // 15 /// ENST00000393594 // antisense // intron // 15 /// ENST00000441149 // antisense // intron // 14 /// ENST00000475805 // antisense // intron // 15 /// ENST00000479174 // antisense // intron // 2 /// ENST00000486160 // antisense // intron // 15 /// ENST00000493925 // antisense // intron // 2 /// OTTHUMT00…	hsa-mir-199b // chr9:131007000-131007109 (-) /// hsa-mir-3154 // chr9:131007226-131007309 (-)
20500459	1.52009	0.11178	P	1.39557	-0.01152	A	1.03651	-0.44065	A	1.05048	-0.42132	A	1.41795	0.01143	A	1.60649	0.19153	A	1.31739	1.35831	0.969877	-0.0441267	0.87727	PA	0	miRNA	miRBase	Homo sapiens	hsa-miR-203a	chr14:104583806-104583827 (+)	22	GUGAAAUGUUUAGGACCACUAG	MIMAT0000264_st	MIMAT0000264	---	hsa-mir-203a // chr14:104583742-104583851 (+) /// hsa-mir-203b // chr14:104583755-104583840 (-)
20500460	1.22847	-0.03002	A	1.14111	-0.13644	A	1.62351	0.37224	A	1.26691	0.01444	A	1.24168	-0.01458	A	1.46066	0.21975	A	1.33103	1.32308	1.00601	0.00863916	0.979858	AA	0	miRNA	miRBase	Homo sapiens	hsa-miR-204-5p	chr9:73424947-73424968 (-)	22	UUCCCUUUGUCAUCCUAUGCCU	MIMAT0000265_st	MIMAT0000265	ENST00000357533 // sense // intron // 6 /// ENST00000358082 // sense // intron // 5 /// ENST00000360823 // sense // intron // 7 /// ENST00000361823 // sense // intron // 6 /// ENST00000377101 // sense // intron // 6 /// ENST00000377105 // sense // intron // 6 /// ENST00000377106 // sense // intron // 7 /// ENST00000377110 // sense // intron // 6 /// ENST00000377111 // sense // intron // 6 /// ENS…	---
20500461	6.46745	1.08918	P	3.40182	0.16229	P	5.22726	0.78204	P	2.13437	-0.5102	P	2.67793	-0.18289	P	1.47479	-1.0435	A	5.03218	2.0957	2.4012	1.26375	0.0274618	PA	0	miRNA	miRBase	Homo sapiens	hsa-miR-204-3p	chr9:73424909-73424929 (-)	21	GCUGGGAAGGCAAAGGGACGU	MIMAT0022693_st	MIMAT0022693	ENST00000357533 // sense // intron // 6 /// ENST00000358082 // sense // intron // 5 /// ENST00000360823 // sense // intron // 7 /// ENST00000361823 // sense // intron // 6 /// ENST00000377101 // sense // intron // 6 /// ENST00000377105 // sense // intron // 6 /// ENST00000377106 // sense // intron // 7 /// ENST00000377110 // sense // intron // 6 /// ENST00000377111 // sense // intron // 6 /// ENS…	---
20500462	1.94288	0.5273	A	1.21513	-0.14979	A	1.18208	-0.18956	A	1.22847	-0.13403	A	1.6994	0.33413	A	1.46767	0.12263	A	1.4467	1.46518	0.987385	-0.0183155	0.875525	AA	0	miRNA	miRBase	Homo sapiens	hsa-miR-205-5p	chr1:209605511-209605532 (+)	22	UCCUUCAUUCCACCGGAGUCUG	MIMAT0000266_st	MIMAT0000266	ENST00000366437 // sense // exon // 4 /// ENST00000429156 // sense // exon // 5 /// ENST00000431096 // sense // exon // 4 /// ENST00000433108 // sense // exon // 2 /// ENST00000440276 // sense // exon // 4 /// ENST00000451937 // sense // exon // 4 /// ENST00000458250 // sense // intron // 3 /// ENST00000603283 // sense // exon // 3 /// OTTHUMT00000088231 // sense // exon // 2 /// OTTHUMT000000882…	---
20500463	1.1987	0.06422	A	1.06959	-0.10019	A	1.07126	-0.09794	A	1.09432	-0.06721	A	1.48402	0.37227	A	1.27374	0.15183	A	1.11318	1.28403	0.866947	-0.205984	0.226875	AA	0	miRNA	miRBase	Homo sapiens	hsa-miR-205-3p	chr1:209605548-209605568 (+)	21	GAUUUCAGUGGAGUGAAGUUC	MIMAT0009197_st	MIMAT0009197	ENST00000366437 // sense // exon // 4 /// ENST00000429156 // sense // exon // 5 /// ENST00000431096 // sense // exon // 4 /// ENST00000433108 // sense // exon // 2 /// ENST00000440276 // sense // exon // 4 /// ENST00000451937 // sense // exon // 4 /// ENST00000458250 // sense // intron // 3 /// ENST00000603283 // sense // exon // 3 /// OTTHUMT00000088231 // sense // exon // 2 /// OTTHUMT000000882…	---
20500464	1.51439	-0.2391	A	1.36825	-0.38551	A	1.86782	0.06351	A	1.78229	-0.00411	A	1.79245	0.00409	A	2.4526	0.45647	A	1.58349	2.00911	0.788152	-0.343454	0.167746	AA	0	miRNA	miRBase	Homo sapiens	hsa-miR-210-5p	chr11:568150-568171 (-)	22	AGCCCCUGCCCACCGCACACUG	MIMAT0026475_st	MIMAT0026475	ENST00000500447 // sense // intron // 1 /// ENST00000528245 // sense // intron // 1 /// ENST00000533920 // sense // intron // 1 /// ENST00000534540 // sense // intron // 1 /// OTTHUMT00000383231 // sense // intron // 1 /// OTTHUMT00000383232 // sense // intron // 1 /// OTTHUMT00000383233 // sense // intron // 1 /// OTTHUMT00000383234 // sense // intron // 1	---
20500465	2.21285	0.38625	A	1.71456	0.01818	A	6.24111	1.88215	P	1.41632	-0.25751	A	1.6716	-0.01842	A	1.07662	-0.65315	A	3.38951	1.38818	2.44169	1.28788	0.14818	PA	0	miRNA	miRBase	Homo sapiens	hsa-miR-210-3p	chr11:568112-568133 (-)	22	CUGUGCGUGUGACAGCGGCUGA	MIMAT0000267_st	MIMAT0000267	ENST00000500447 // sense // intron // 1 /// ENST00000528245 // sense // intron // 1 /// ENST00000533920 // sense // intron // 1 /// ENST00000534540 // sense // intron // 1 /// OTTHUMT00000383231 // sense // intron // 1 /// OTTHUMT00000383232 // sense // intron // 1 /// OTTHUMT00000383233 // sense // intron // 1 /// OTTHUMT00000383234 // sense // intron // 1	---
20500466	1.28785	0	A	1.11779	-0.20431	A	1.28785	0	A	1.28785	0	A	1.28785	0	A	1.28785	0	A	1.23116	1.28785	0.955983	-0.0649424	0.373901	AA	0	miRNA	miRBase	Homo sapiens	hsa-miR-211-5p	chr15:31357298-31357319 (-)	22	UUCCCUUUGUCAUCCUUCGCCU	MIMAT0000268_st	MIMAT0000268	ENST00000256552 // sense // intron // 7 /// ENST00000397795 // sense // intron // 6 /// ENST00000542188 // sense // intron // 6 /// ENST00000558445 // sense // intron // 6 /// ENST00000558768 // sense // intron // 4 /// ENST00000559177 // sense // intron // 4 /// ENST00000560658 // sense // intron // 6 /// ENST00000560801 // sense // intron // 4 /// OTTHUMT00000251378 // sense // intron // 6 /// …	---
20500467	2.59451	0.56259	P	1.48245	-0.24489	A	1.77979	0.01884	A	1.73361	-0.01909	A	1.83402	0.06214	A	1.29074	-0.44467	A	1.95225	1.61946	1.2055	0.269628	0.436615	PA	0	miRNA	miRBase	Homo sapiens	hsa-miR-211-3p	chr15:31357262-31357282 (-)	21	GCAGGGACAGCAAAGGGGUGC	MIMAT0022694_st	MIMAT0022694	ENST00000256552 // sense // intron // 7 /// ENST00000397795 // sense // intron // 6 /// ENST00000542188 // sense // intron // 6 /// ENST00000558445 // sense // intron // 6 /// ENST00000558768 // sense // intron // 4 /// ENST00000559177 // sense // intron // 4 /// ENST00000560658 // sense // intron // 6 /// ENST00000560801 // sense // intron // 4 /// OTTHUMT00000251378 // sense // intron // 6 /// …	---
20500468	1.41361	0.05637	P	1.30529	-0.05866	A	1.30529	-0.05866	A	1.90454	0.48642	P	1.59581	0.23126	P	1.29566	-0.06934	A	1.3414	1.59867	0.83907	-0.253136	0.225456	PA	0	miRNA	miRBase	Homo sapiens	hsa-miR-212-5p	chr17:1953622-1953644 (-)	23	ACCUUGGCUCUAGACUGCUUACU	MIMAT0022695_st	MIMAT0022695	---	hsa-mir-212 // chr17:1953565-1953674 (-) /// hsa-mir-132 // chr17:1953202-1953302 (-)
20500469	1.70977	0.25149	A	1.28665	-0.15869	A	1.33173	-0.10901	A	1.42849	-0.00782	A	1.55737	0.1168	A	1.44402	0.00778	A	1.44272	1.47663	0.977035	-0.0335171	0.759241	AA	0	miRNA	miRBase	Homo sapiens	hsa-miR-212-3p	chr17:1953584-1953604 (-)	21	UAACAGUCUCCAGUCACGGCC	MIMAT0000269_st	MIMAT0000269	---	hsa-mir-212 // chr17:1953565-1953674 (-) /// hsa-mir-132 // chr17:1953202-1953302 (-)
20500470	1.22847	-0.09056	A	1.76683	0.43375	A	1.25067	-0.06472	A	1.3884	0.08601	A	1.22847	-0.09056	A	1.36543	0.06194	A	1.41532	1.32743	1.06621	0.0924923	0.702215	AA	0	miRNA	miRBase	Homo sapiens	hsa-miR-181a-3p	chr1:198828198-198828219 (-)	22	ACCAUCGACCGUUGAUUGUACC	MIMAT0000270_st	MIMAT0000270	ENST00000432296 // sense // intron // 2 /// OTTHUMT00000087434 // sense // intron // 2	hsa-mir-181b-1 // chr1:198828002-198828111 (-) /// hsa-mir-181a-1 // chr1:198828173-198828282 (-)
20500471	1.18624	0	A	1.18624	0	A	1.35071	0.18733	A	1.10151	-0.10691	A	1.18624	0	A	1.18624	0	A	1.24106	1.158	1.07173	0.0999456	0.244224	AA	0	miRNA	miRBase	Homo sapiens	hsa-miR-214-5p	chr1:172107997-172108018 (-)	22	UGCCUGUCUACACUUGCUGUGC	MIMAT0004564_st	MIMAT0004564	ENST00000355305 // antisense // intron // 15 /// ENST00000358155 // antisense // intron // 14 /// ENST00000367731 // antisense // intron // 14 /// ENST00000520906 // antisense // intron // 14 /// ENST00000523513 // antisense // intron // 13 /// OTTHUMT00000084529 // antisense // intron // 14 /// OTTHUMT00000084531 // antisense // intron // 15 /// OTTHUMT00000378443 // antisense // intron // 14 //…	hsa-mir-199a-2 // chr1:172113675-172113784 (-) /// hsa-mir-214 // chr1:172107938-172108047 (-) /// hsa-mir-3120 // chr1:172107948-172108028 (+)
20500472	3.47785	0.24902	P	15.3628	2.39219	P	2.37513	-0.30116	P	1.84546	-0.66519	P	7.0146	1.26119	P	1.54591	-0.92071	A	7.07192	3.46866	2.03881	1.02772	0.453927	PA	0	miRNA	miRBase	Homo sapiens	hsa-miR-214-3p	chr1:172107956-172107977 (-)	22	ACAGCAGGCACAGACAGGCAGU	MIMAT0000271_st	MIMAT0000271	ENST00000355305 // antisense // intron // 15 /// ENST00000358155 // antisense // intron // 14 /// ENST00000367731 // antisense // intron // 14 /// ENST00000520906 // antisense // intron // 14 /// ENST00000523513 // antisense // intron // 13 /// OTTHUMT00000084529 // antisense // intron // 14 /// OTTHUMT00000084531 // antisense // intron // 15 /// OTTHUMT00000378443 // antisense // intron // 14 //…	hsa-mir-199a-2 // chr1:172113675-172113784 (-) /// hsa-mir-214 // chr1:172107938-172108047 (-) /// hsa-mir-3120 // chr1:172107948-172108028 (+)
20500473	1.09392	-0.25595	A	0.96961	-0.42998	A	1.51862	0.21731	A	1.60262	0.29498	A	1.63429	0.32321	P	0.95779	-0.44767	A	1.19405	1.39823	0.85397	-0.227742	0.539533	PA	0	miRNA	miRBase	Homo sapiens	hsa-miR-215-5p	chr1:220291258-220291278 (-)	21	AUGACCUAUGAAUUGACAGAC	MIMAT0000272_st	MIMAT0000272	ENST00000302637 // antisense // intron // 12 /// ENST00000366922 // antisense // intron // 12 /// ENST00000490891 // antisense // intron // 1 /// OTTHUMT00000090761 // antisense // intron // 12 /// OTTHUMT00000090763 // antisense // intron // 1	hsa-mir-215 // chr1:220291195-220291304 (-) /// hsa-mir-194-1 // chr1:220291499-220291583 (-)
20500474	1.37927	0.3494	A	1.0826	0	A	1.0826	0	A	1.41733	0.38867	A	0.95337	-0.18339	A	1.01932	-0.0869	A	1.18149	1.13001	1.04556	0.0642761	0.734492	AA	0	miRNA	miRBase	Homo sapiens	hsa-miR-215-3p	chr1:220291219-220291241 (-)	23	UCUGUCAUUUCUUUAGGCCAAUA	MIMAT0026476_st	MIMAT0026476	ENST00000302637 // antisense // intron // 12 /// ENST00000366922 // antisense // intron // 12 /// ENST00000490891 // antisense // intron // 1 /// OTTHUMT00000090761 // antisense // intron // 12 /// OTTHUMT00000090763 // antisense // intron // 1	hsa-mir-215 // chr1:220291195-220291304 (-) /// hsa-mir-194-1 // chr1:220291499-220291583 (-)
20500475	1.34716	0.13582	A	1.21656	-0.0113	A	1.18849	-0.04498	A	1.44651	0.23847	A	1.18849	-0.04498	A	1.23568	0.01121	A	1.25074	1.29023	0.969393	-0.0448465	0.705937	AA	0	miRNA	miRBase	Homo sapiens	hsa-miR-216a-5p	chr2:56216155-56216176 (-)	22	UAAUCUCAGCUGGCAACUGUGA	MIMAT0000273_st	MIMAT0000273	ENST00000446139 // sense // intron // 2 /// OTTHUMT00000324929 // sense // intron // 2	hsa-mir-216a // chr2:56216085-56216194 (-) /// hsa-mir-217 // chr2:56210102-56210211 (-)
20500476	1.16488	-0.07667	A	1.22847	0	A	1.22847	0	A	1.09142	-0.17065	A	1.33933	0.12466	A	1.22847	0	A	1.20727	1.21974	0.989779	-0.0148213	0.914372	AA	0	miRNA	miRBase	Homo sapiens	hsa-miR-216a-3p	chr2:56216116-56216137 (-)	22	UCACAGUGGUCUCUGGGAUUAU	MIMAT0022844_st	MIMAT0022844	ENST00000446139 // sense // intron // 2 /// OTTHUMT00000324929 // sense // intron // 2	hsa-mir-216a // chr2:56216085-56216194 (-) /// hsa-mir-217 // chr2:56210102-56210211 (-)
20500477	1.22847	0	A	1.22847	0	A	1.22847	0	A	1.136	-0.1129	A	1.22847	0	A	1.32847	0.1129	A	1.22847	1.23098	0.997961	-0.0029447	0.999997	AA	0	miRNA	miRBase	Homo sapiens	hsa-miR-217	chr2:56210155-56210177 (-)	23	UACUGCAUCAGGAACUGAUUGGA	MIMAT0000274_st	MIMAT0000274	ENST00000446139 // sense // intron // 2 /// OTTHUMT00000324929 // sense // intron // 2	hsa-mir-216a // chr2:56216085-56216194 (-) /// hsa-mir-217 // chr2:56210102-56210211 (-)
20500478	1.05048	-0.03923	A	1.05048	-0.03923	A	1.29619	0.26399	A	1.10839	0.03819	A	1.05048	-0.03923	A	1.89126	0.80907	P	1.13238	1.35004	0.838776	-0.253643	0.512514	PA	0	miRNA	miRBase	Homo sapiens	hsa-miR-218-5p	chr4:20529922-20529942 (+) /// chr5:168195216-168195236 (-)	21	UUGUGCUUGAUCUAACCAUGU	MIMAT0000275_st	MIMAT0000275	ENST00000273739 // sense // intron // 16 /// ENST00000503823 // sense // intron // 14 /// ENST00000503837 // sense // intron // 15 /// ENST00000504154 // sense // intron // 15 /// OTTHUMT00000250396 // sense // intron // 15 /// OTTHUMT00000359841 // sense // intron // 14 /// OTTHUMT00000359842 // sense // intron // 15 /// OTTHUMT00000359843 // sense // intron // 16 /// ENST00000332966 // sense //…	---
20500479	1.23358	0	A	1.08337	-0.18732	A	1.08337	-0.18732	A	1.23358	0	A	1.39133	0.17362	A	1.23358	0	A	1.13344	1.28616	0.881257	-0.182366	0.098353	AA	0	miRNA	miRBase	Homo sapiens	hsa-miR-218-1-3p	chr4:20529965-20529986 (+)	22	AUGGUUCCGUCAAGCACCAUGG	MIMAT0004565_st	MIMAT0004565	ENST00000273739 // sense // intron // 16 /// ENST00000503823 // sense // intron // 14 /// ENST00000503837 // sense // intron // 15 /// ENST00000504154 // sense // intron // 15 /// OTTHUMT00000250396 // sense // intron // 15 /// OTTHUMT00000359841 // sense // intron // 14 /// OTTHUMT00000359842 // sense // intron // 15 /// OTTHUMT00000359843 // sense // intron // 16	---
20500480	1.05048	-0.1129	A	1.136	0	A	1.22847	0.1129	A	1.136	0	A	1.04203	-0.12455	A	1.35071	0.24977	A	1.13832	1.17625	0.967753	-0.0472887	0.760552	AA	0	miRNA	miRBase	Homo sapiens	hsa-miR-218-2-3p	chr5:168195173-168195194 (-)	22	CAUGGUUCUGUCAAGCACCGCG	MIMAT0004566_st	MIMAT0004566	ENST00000332966 // sense // intron // 14 /// ENST00000404867 // sense // intron // 14 /// ENST00000519486 // sense // intron // 4 /// ENST00000519560 // sense // intron // 14 /// OTTHUMT00000252792 // sense // intron // 14 /// OTTHUMT00000371504 // sense // intron // 14 /// OTTHUMT00000371506 // sense // intron // 4	---
20500481	1.09043	-0.124	A	1.51108	0.34669	A	1.12112	-0.08394	A	1.4189	0.25589	A	1.0814	-0.13599	A	1.25546	0.07933	A	1.24088	1.25192	0.991179	-0.0127826	0.919994	AA	0	miRNA	miRBase	Homo sapiens	hsa-miR-219a-5p	chr6:33175632-33175652 (+) /// chr9:131154955-131154975 (-)	21	UGAUUGUCCAAACGCAAUUCU	MIMAT0000276_st	MIMAT0000276	---	hsa-mir-219a-2 // chr9:131154897-131154993 (-) /// hsa-mir-219b // chr9:131154900-131154987 (+)
20500482	1.22847	0	A	1.1217	-0.13117	A	1.22847	0	A	1.22847	0	A	1.22847	0	A	1.22847	0	A	1.19288	1.22847	0.971029	-0.0424137	0.373901	AA	0	miRNA	miRBase	Homo sapiens	hsa-miR-219a-1-3p	chr6:33175673-33175694 (+)	22	AGAGUUGAGUCUGGACGUCCCG	MIMAT0004567_st	MIMAT0004567	---	---
20500483	1.6635	0.052	A	1.12109	-0.51732	A	1.56509	-0.03597	A	1.64411	0.03509	A	1.67285	0.06009	A	1.40591	-0.19071	A	1.44989	1.57429	0.920982	-0.118755	0.524274	AA	0	miRNA	miRBase	Homo sapiens	hsa-miR-221-5p	chrX:45605649-45605670 (-)	22	ACCUGGCAUACAAUGUAGAUUU	MIMAT0004568_st	MIMAT0004568	ENST00000602461 // sense // intron // 1 /// OTTHUMT00000467990 // sense // intron // 1	hsa-mir-221 // chrX:45605585-45605694 (-) /// hsa-mir-222 // chrX:45606421-45606530 (-)
20500484	15.7361	2.35486	P	1.11235	-1.46754	A	4.69173	0.60897	P	1.46066	-1.07453	A	5.73212	0.89792	P	1.26789	-1.27872	A	7.18007	2.82022	2.54592	1.34819	0.492754	PA	0	miRNA	miRBase	Homo sapiens	hsa-miR-221-3p	chrX:45605608-45605630 (-)	23	AGCUACAUUGUCUGCUGGGUUUC	MIMAT0000278_st	MIMAT0000278	ENST00000602461 // sense // intron // 1 /// OTTHUMT00000467990 // sense // intron // 1	hsa-mir-221 // chrX:45605585-45605694 (-) /// hsa-mir-222 // chrX:45606421-45606530 (-)
20500485	1.57754	0.4161	P	1.14172	-0.05036	A	1.22284	0.04866	A	1.09019	-0.117	A	1.09019	-0.117	A	1.36715	0.20959	A	1.31403	1.18251	1.11122	0.152149	0.459354	PA	0	miRNA	miRBase	Homo sapiens	hsa-miR-222-5p	chrX:45606479-45606500 (-)	22	CUCAGUAGCCAGUGUAGAUCCU	MIMAT0004569_st	MIMAT0004569	ENST00000602461 // sense // intron // 1 /// OTTHUMT00000467990 // sense // intron // 1	hsa-mir-221 // chrX:45605585-45605694 (-) /// hsa-mir-222 // chrX:45606421-45606530 (-)
20500486	4.64033	1.78721	P	1.22895	-0.12959	A	1.45051	0.10954	A	1.23839	-0.11855	A	2.35633	0.80952	P	0.95064	-0.50005	A	2.43993	1.51512	1.61039	0.687408	0.504618	PA	0	miRNA	miRBase	Homo sapiens	hsa-miR-222-3p	chrX:45606442-45606462 (-)	21	AGCUACAUCUGGCUACUGGGU	MIMAT0000279_st	MIMAT0000279	ENST00000602461 // sense // intron // 1 /// OTTHUMT00000467990 // sense // intron // 1	hsa-mir-221 // chrX:45605585-45605694 (-) /// hsa-mir-222 // chrX:45606421-45606530 (-)
20500487	1.20337	0	A	0.90219	-0.41559	A	1.09814	-0.13202	A	1.46066	0.27954	A	1.36396	0.18072	A	1.20337	0	A	1.0679	1.34266	0.795359	-0.330321	0.0848713	AA	0	miRNA	miRBase	Homo sapiens	hsa-miR-223-5p	chrX:65238737-65238758 (+)	22	CGUGUAUUUGACAAGCUGAGUU	MIMAT0004570_st	MIMAT0004570	---	---
20500488	4.07863	1.36349	P	1.22847	-0.36774	A	1.67699	0.08128	A	1.49326	-0.08613	A	2.67297	0.75384	P	1.24693	-0.34622	A	2.32803	1.80439	1.29021	0.367601	0.703518	PA	0	miRNA	miRBase	Homo sapiens	hsa-miR-223-3p	chrX:65238779-65238800 (+)	22	UGUCAGUUUGUCAAAUACCCCA	MIMAT0000280_st	MIMAT0000280	---	---
20500489	1.21672	-0.04808	A	1.22282	-0.04086	A	1.28389	0.02944	A	1.2611	0.0036	A	1.25481	-0.00361	A	1.30709	0.05528	A	1.24114	1.27433	0.973955	-0.038073	0.283491	AA	0	miRNA	miRBase	Homo sapiens	hsa-miR-224-5p	chrX:151127103-151127123 (-)	21	CAAGUCACUAGUGGUUCCGUU	MIMAT0000281_st	MIMAT0000281	ENST00000370325 // sense // intron // 6 /// ENST00000370328 // sense // intron // 6 /// ENST00000393914 // sense // intron // 7 /// ENST00000441219 // sense // intron // 7 /// ENST00000476016 // sense // exon // 3 /// ENST00000486255 // sense // exon // 1 /// OTTHUMT00000060903 // sense // intron // 6 /// OTTHUMT00000060904 // sense // intron // 6 /// OTTHUMT00000060907 // sense // intron // 7 //…	hsa-mir-224 // chrX:151127050-151127130 (-) /// hsa-mir-452 // chrX:151128100-151128184 (-)
20500490	1.35967	0.13287	A	1.17879	-0.07308	A	1.23727	-0.00323	A	1.46066	0.23623	A	1.22847	-0.01353	P	1.24281	0.00322	A	1.25858	1.31065	0.960272	-0.0584857	0.605226	PA	0	miRNA	miRBase	Homo sapiens	hsa-miR-224-3p	chrX:151127056-151127078 (-)	23	AAAAUGGUGCCCUAGUGACUACA	MIMAT0009198_st	MIMAT0009198	ENST00000370325 // sense // intron // 6 /// ENST00000370328 // sense // intron // 6 /// ENST00000393914 // sense // intron // 7 /// ENST00000441219 // sense // intron // 7 /// ENST00000476016 // sense // exon // 3 /// ENST00000486255 // sense // exon // 1 /// OTTHUMT00000060903 // sense // intron // 6 /// OTTHUMT00000060904 // sense // intron // 6 /// OTTHUMT00000060907 // sense // intron // 7 //…	hsa-mir-224 // chrX:151127050-151127130 (-) /// hsa-mir-452 // chrX:151128100-151128184 (-)
20500491	1.58274	0.19016	P	1.48236	0.09563	A	1.7003	0.29353	P	1.22847	-0.17541	A	1.22847	-0.17541	A	1.29221	-0.10242	A	1.58847	1.24972	1.27106	0.346034	0.00518527	PA	0	miRNA	miRBase	Caenorhabditis elegans	cel-miR-124-5p	IV:11871732-11871754 (+)	23	GCAUGCACCCUAGUGACUUUAGU	MIMAT0015111_st	MIMAT0015111	C29E6.2 // sense // intron // 5 /// C29E6.7 // sense // exon // 1 /// C29E6.8 // antisense // exon // 1	---
20500492	1.11578	0.04457	A	1.09041	0.0114	A	1.07216	-0.01296	A	1.07325	-0.01149	A	1.21893	0.17214	A	1.07216	-0.01296	A	1.09278	1.12145	0.974441	-0.0373536	0.612875	AA	0	miRNA	miRBase	Caenorhabditis elegans	cel-miR-124-3p	IV:11871775-11871795 (+)	21	UAAGGCACGCGGUGAAUGCCA	MIMAT0000282_st	MIMAT0000282	C29E6.2 // sense // intron // 5 /// C29E6.7 // sense // exon // 1 /// C29E6.8 // antisense // exon // 1	---
20500493	1.36769	-0.0699	A	1.04841	-0.45343	A	1.50886	0.07182	A	1.75703	0.2915	A	1.33523	-0.10454	A	1.50348	0.06667	A	1.30832	1.53191	0.854043	-0.227619	0.293062	AA	0	miRNA	miRBase	Caenorhabditis elegans	cel-miR-228-5p	IV:5562031-5562053 (+)	23	AAUGGCACUGCAUGAAUUCACGG	MIMAT0000283_st	MIMAT0000283	T12E12.7 // sense // exon // 1	cel-mir-228 // IV:5562016-5562113 (+) /// cel-mir-790 // IV:5566413-5566482 (+)
20500494	1.22847	0.21152	A	1.04693	-0.01917	A	1.05409	-0.00934	A	1.04684	-0.0193	A	1.06779	0.00928	A	1.21362	0.19398	A	1.10983	1.10942	1.00037	0.000537402	0.99761	AA	0	miRNA	miRBase	Caenorhabditis elegans	cel-miR-228-3p	IV:5562073-5562094 (+)	22	GCGGAUCAUACGGUACCAUAGC	MIMAT0020327_st	MIMAT0020327	T12E12.7 // sense // exon // 1	cel-mir-228 // IV:5562016-5562113 (+) /// cel-mir-790 // IV:5566413-5566482 (+)
20500495	1.27475	0	A	1.27475	0	A	1.27475	0	A	1.27475	0	A	0.97153	-0.39188	A	1.27475	0	A	1.27475	1.17368	1.08612	0.119179	0.373901	AA	0	miRNA	miRBase	Caenorhabditis elegans	cel-miR-229-5p	III:2172449-2172474 (+)	26	AAUGACACUGGUUAUCUUUUCCAUCG	MIMAT0000284_st	MIMAT0000284	Y48G9A.16 // sense // exon // 1 /// Y48G9A.3 // sense // intron // 11	cel-mir-64 // III:2172838-2172947 (+) /// cel-mir-65 // III:2172992-2173091 (+) /// cel-mir-66 // III:2173098-2173196 (+) /// cel-mir-229 // III:2172442-2172556 (+)
20500496	1.1273	-0.15383	A	1.08404	-0.21028	A	1.42397	0.18323	A	1.47505	0.23407	A	1.26771	0.01553	A	1.24057	-0.0157	A	1.21177	1.32778	0.912631	-0.131897	0.396748	AA	0	miRNA	miRBase	Caenorhabditis elegans	cel-miR-229-3p	III:2172529-2172550 (+)	22	AGAAAGGUAUCGGGUGUCAUAG	MIMAT0015112_st	MIMAT0015112	Y48G9A.16 // sense // exon // 1 /// Y48G9A.3 // sense // intron // 11	cel-mir-64 // III:2172838-2172947 (+) /// cel-mir-65 // III:2172992-2173091 (+) /// cel-mir-66 // III:2173098-2173196 (+) /// cel-mir-229 // III:2172442-2172556 (+)
20500497	1.44858	0.10849	A	1.22847	-0.1293	A	1.17743	-0.19052	A	1.44858	0.10849	A	1.23871	-0.11732	A	1.46066	0.12047	A	1.28483	1.38265	0.929249	-0.105862	0.418853	AA	0	miRNA	miRBase	Caenorhabditis elegans	cel-miR-230-5p	X:5803873-5803895 (+)	23	ACUUGGUCGGCGAUUUAAUAUUA	MIMAT0015113_st	MIMAT0015113	F46G11.5 // sense // exon // 1	cel-mir-230 // X:5803857-5803954 (+) /// cel-mir-791 // X:5809314-5809398 (+)
20500498	1.35629	0.34853	A	0.94094	-0.17895	A	0.91604	-0.21766	A	1.46066	0.45549	A	1.05048	-0.02008	A	1.07993	0.0198	A	1.07109	1.19702	0.894795	-0.160372	0.519425	AA	0	miRNA	miRBase	Caenorhabditis elegans	cel-miR-230-3p	X:5803917-5803939 (+)	23	GUAUUAGUUGUGCGACCAGGAGA	MIMAT0000285_st	MIMAT0000285	F46G11.5 // sense // exon // 1	cel-mir-230 // X:5803857-5803954 (+) /// cel-mir-791 // X:5809314-5809398 (+)
20500499	0.98856	-0.15021	A	1.05589	-0.05515	A	1.32915	0.27689	A	1.32019	0.26714	A	1.05589	-0.05515	A	1.13818	0.05312	A	1.12453	1.17142	0.959975	-0.058932	0.708057	AA	0	miRNA	miRBase	Caenorhabditis elegans	cel-miR-231-5p	III:7545051-7545072 (-)	22	CUGACUGUUUCAAAAGCUUGUA	MIMAT0020328_st	MIMAT0020328	R13A5.14 // sense // exon // 1 /// R13A5.17 // sense // intron // 1	---
20500500	1.22847	0.07072	A	0.91239	-0.35841	A	1.18454	0.01819	A	1.09196	-0.09922	A	1.33721	0.19308	P	1.15486	-0.01842	A	1.10847	1.19468	0.927838	-0.108055	0.51409	PA	0	miRNA	miRBase	Caenorhabditis elegans	cel-miR-231-3p	III:7545006-7545029 (-)	24	UAAGCUCGUGAUCAACAGGCAGAA	MIMAT0000286_st	MIMAT0000286	R13A5.14 // sense // exon // 1 /// R13A5.17 // sense // intron // 1	---
20500501	1.22847	0	A	1.22847	0	A	1.12688	-0.12453	A	1.4366	0.2258	A	1.70889	0.4762	A	1.22847	0	A	1.19461	1.45799	0.819354	-0.287442	0.127588	AA	0	miRNA	miRBase	Caenorhabditis elegans	cel-miR-232-5p	IV:10994205-10994227 (-)	23	CCUGCAGUUUCGAUGAUUUUAUC	MIMAT0020777_st	MIMAT0020777	F13H10.7 // sense // exon // 1	---
20500502	1.33797	0.06028	A	1.47301	0.19901	A	1.21097	-0.08361	A	1.22847	-0.06291	A	1.20885	-0.08613	A	1.77605	0.46891	A	1.34065	1.40446	0.954568	-0.0670795	0.820825	AA	0	miRNA	miRBase	Caenorhabditis elegans	cel-miR-232-3p	IV:10994163-10994185 (-)	23	UAAAUGCAUCUUAACUGCGGUGA	MIMAT0000287_st	MIMAT0000287	F13H10.7 // sense // exon // 1	---
20500503	1.14536	-0.19326	A	1.64623	0.3301	A	1.08979	-0.26502	A	1.29577	-0.01525	A	1.32332	0.01509	A	1.62032	0.30721	A	1.29379	1.41314	0.915547	-0.127294	0.534806	AA	0	miRNA	miRBase	Caenorhabditis elegans	cel-miR-233-5p	X:12078576-12078598 (-)	23	UCGCCCAUCCCGUUGCUCCAAUA	MIMAT0020329_st	MIMAT0020329	W03G11.4.1 // sense // intron // 2 /// W03G11.4.2 // sense // intron // 3 /// W03G11.4.3 // sense // intron // 2 /// W03G11.5 // sense // exon // 1	---
20500504	1.22369	0	A	1.22369	0	A	1.3233	0.1129	A	1.22369	0	A	1.13158	-0.1129	A	1.10095	-0.15249	A	1.25689	1.15207	1.09098	0.12563	0.100162	AA	0	miRNA	miRBase	Caenorhabditis elegans	cel-miR-233-3p	X:12078536-12078556 (-)	21	UUGAGCAAUGCGCAUGUGCGG	MIMAT0000288_st	MIMAT0000288	W03G11.4.1 // sense // intron // 2 /// W03G11.4.2 // sense // intron // 3 /// W03G11.4.3 // sense // intron // 2 /// W03G11.5 // sense // exon // 1	---
20500505	1.30634	0.20118	A	1.27862	0.17024	A	0.91822	-0.30743	A	0.87389	-0.37883	A	1.13959	0.00417	A	1.13302	-0.00418	A	1.16773	1.04883	1.11336	0.154917	0.516122	AA	0	miRNA	miRBase	Caenorhabditis elegans	cel-miR-234-5p	II:14466247-14466268 (-)	22	CGGUAUUCCAGAGUUGAUAAUA	MIMAT0020330_st	MIMAT0020330	C13B4.3 // sense // exon // 1 /// C13B4.6 // antisense // exon // 1	---
20500506	1.43015	0.27672	A	1.22847	0.05741	A	1.29214	0.13032	A	1.13261	-0.05979	A	1.10494	-0.09548	A	1.10494	-0.09548	A	1.31692	1.11416	1.18198	0.241207	0.0220471	AA	0	miRNA	miRBase	Caenorhabditis elegans	cel-miR-234-3p	II:14466203-14466223 (-)	21	UUAUUGCUCGAGAAUACCCUU	MIMAT0000289_st	MIMAT0000289	C13B4.3 // sense // exon // 1 /// C13B4.6 // antisense // exon // 1	---
20500507	1.19512	0.03941	A	1.00416	-0.21176	A	1.16518	0.00281	A	1.16065	-0.00281	A	1.07979	-0.10699	A	1.35203	0.21737	A	1.12149	1.19749	0.936531	-0.0946011	0.496426	AA	0	miRNA	miRBase	Caenorhabditis elegans	cel-miR-235-5p	I:6162349-6162371 (-)	23	AGGCCUUGGCUGAUUGCAAAAUU	MIMAT0020331_st	MIMAT0020331	T09B4.12 // sense // exon // 1	---
20500508	1.48299	0.205	A	1.87008	0.53959	A	1.06853	-0.26789	A	1.05048	-0.29246	A	1.13772	-0.17737	A	1.43539	0.15793	A	1.47387	1.20786	1.22023	0.287149	0.386037	AA	0	miRNA	miRBase	Caenorhabditis elegans	cel-miR-235-3p	I:6162308-6162329 (-)	22	UAUUGCACUCUCCCCGGCCUGA	MIMAT0000290_st	MIMAT0000290	T09B4.12 // sense // exon // 1	---
20500509	1.0608	-0.21744	A	1.24564	0.0143	A	1.22847	-0.00573	A	1.22847	-0.00573	A	1.42829	0.21169	A	1.23825	0.00571	A	1.1783	1.29834	0.907548	-0.139954	0.242859	AA	0	miRNA	miRBase	Caenorhabditis elegans	cel-miR-236-5p	II:7030194-7030217 (-)	24	CGUCUUACCUGUUCAAUAUUUAGA	MIMAT0020332_st	MIMAT0020332	C52E12.1.1 // antisense // exon // 15 /// C52E12.1.2 // antisense // exon // 15 /// C52E12.7 // sense // exon // 1	---
20500510	1.14976	-0.20967	A	1.23871	-0.10217	A	1.42052	0.09541	A	1.44858	0.12363	A	1.08853	-0.28863	A	1.51572	0.189	A	1.26966	1.35094	0.939835	-0.0895212	0.669301	AA	0	miRNA	miRBase	Caenorhabditis elegans	cel-miR-236-3p	II:7030153-7030175 (-)	23	UAAUACUGUCAGGUAAUGACGCU	MIMAT0000291_st	MIMAT0000291	C52E12.1.1 // antisense // exon // 15 /// C52E12.1.2 // antisense // exon // 15 /// C52E12.7 // sense // exon // 1	---
20500511	1.136	0	A	1.136	0	A	1.01992	-0.15549	A	1.2127	0.09427	A	1.136	0	A	1.32847	0.2258	A	1.09731	1.22572	0.895232	-0.159667	0.130503	AA	0	miRNA	miRBase	Caenorhabditis elegans	cel-miR-237-5p	X:8154050-8154072 (+)	23	UCCCUGAGAAUUCUCGAACAGCU	MIMAT0000292_st	MIMAT0000292	F22F1.4 // sense // exon // 1	---
20500512	1.09637	-0.0844	A	1.53651	0.40253	A	1.03574	-0.16646	A	1.2432	0.09694	A	1.03574	-0.16646	A	1.22847	0.07973	A	1.22287	1.16914	1.04596	0.0648314	0.822502	AA	0	miRNA	miRBase	Caenorhabditis elegans	cel-miR-237-3p	X:8154087-8154108 (+)	22	CUGUCGAGUUUUGUCAAGGACC	MIMAT0020333_st	MIMAT0020333	F22F1.4 // sense // exon // 1	---
20500513	12.3128	0.0442	P	7.84573	-0.60598	P	5.98893	-0.99558	P	40.8759	1.77529	P	11.5697	-0.0456	P	25.8997	1.11698	P	8.71582	26.1151	0.333746	-1.58318	0.074669	PP	0	miRNA	miRBase	Caenorhabditis elegans	cel-miR-238-5p	III:8867306-8867329 (-)	24	UGGAUGUUCUCGGACGUUCAAAGC	MIMAT0015114_st	MIMAT0015114	K01F9.5 // sense // exon // 1	cel-mir-80 // III:8865189-8865286 (-) /// cel-mir-90 // III:8873906-8874003 (-) /// cel-mir-238 // III:8867247-8867344 (-)
20500514	1.20711	0	A	1.25587	0.05714	A	1.20711	0	A	1.04843	-0.20333	A	1.20711	0	A	1.20711	0	A	1.22336	1.15422	1.05991	0.0839389	0.285002	AA	0	miRNA	miRBase	Caenorhabditis elegans	cel-miR-238-3p	III:8867262-8867284 (-)	23	UUUGUACUCCGAUGCCAUUCAGA	MIMAT0000293_st	MIMAT0000293	K01F9.5 // sense // exon // 1	cel-mir-80 // III:8865189-8865286 (-) /// cel-mir-90 // III:8873906-8874003 (-) /// cel-mir-238 // III:8867247-8867344 (-)
20500515	1.52009	0.3073	A	1.22847	0	A	1.05048	-0.2258	A	1.12959	-0.12106	A	1.22847	0	A	1.22847	0	A	1.26635	1.19551	1.05925	0.0830462	0.694148	AA	0	miRNA	miRBase	Caenorhabditis elegans	cel-miR-239a-5p	X:11792393-11792415 (+)	23	UUUGUACUACACAUAGGUACUGG	MIMAT0000294_st	MIMAT0000294	C34E11.5 // sense // exon // 1	cel-mir-239a // X:11792378-11792475 (+) /// cel-mir-239b // X:11791235-11791332 (-)
20500516	1.30455	0.06263	A	1.53882	0.3009	A	1.1937	-0.06547	A	1.02076	-0.29128	A	1.1266	-0.14894	A	1.33954	0.10082	A	1.34569	1.1623	1.15778	0.211364	0.247405	AA	0	miRNA	miRBase	Caenorhabditis elegans	cel-miR-239a-3p	X:11792436-11792457 (+)	22	AGUGUCUAGUCUAGUGCAAACA	MIMAT0020334_st	MIMAT0020334	C34E11.5 // sense // exon // 1	cel-mir-239a // X:11792378-11792475 (+) /// cel-mir-239b // X:11791235-11791332 (-)
20500517	1.19512	-0.01633	A	1.23311	0.02882	A	1.05048	-0.20243	A	1.22232	0.01614	A	1.18765	-0.02538	A	1.22232	0.01614	A	1.15957	1.21076	0.957718	-0.062327	0.414339	AA	0	miRNA	miRBase	Caenorhabditis elegans	cel-miR-239b-5p	X:11791296-11791317 (-)	22	UUUGUACUACACAAAAGUACUG	MIMAT0000295_st	MIMAT0000295	C34E11.6 // sense // exon // 1	cel-mir-239a // X:11792378-11792475 (+) /// cel-mir-239b // X:11791235-11791332 (-)
20500518	1.34761	0	A	1.34761	0	A	1.34761	0	A	1.34761	0	A	1.32356	-0.02598	A	1.34761	0	A	1.34761	1.33959	1.00598	0.00860794	0.373901	AA	0	miRNA	miRBase	Caenorhabditis elegans	cel-miR-239b-3p	X:11791254-11791275 (-)	22	GCACUUUUGUGGUGUGCAAAAA	MIMAT0015115_st	MIMAT0015115	C34E11.6 // sense // exon // 1	cel-mir-239a // X:11792378-11792475 (+) /// cel-mir-239b // X:11791235-11791332 (-)
20500519	1.18133	-0.05755	A	1.0924	-0.17046	A	1.27749	0.05535	A	1.46066	0.24866	A	1.40409	0.19168	A	1.136	-0.11401	A	1.18374	1.33358	0.887639	-0.171956	0.270236	AA	0	miRNA	miRBase	Caenorhabditis elegans	cel-miR-240-5p	X:7882595-7882617 (+)	23	CGAGGAUUUUGAGACUAGAAUGC	MIMAT0015116_st	MIMAT0015116	C39D10.10 // sense // exon // 1	cel-mir-240 // X:7882574-7882670 (+) /// cel-mir-786 // X:7882703-7882792 (+)
20500520	1.2879	0	A	1.09686	-0.23164	A	1.2879	0	A	1.2879	0	A	1.14526	-0.16935	A	1.79245	0.47691	P	1.22422	1.40854	0.869143	-0.202334	0.436904	PA	0	miRNA	miRBase	Caenorhabditis elegans	cel-miR-240-3p	X:7882634-7882655 (+)	22	UACUGGCCCCCAAAUCUUCGCU	MIMAT0000296_st	MIMAT0000296	C39D10.10 // sense // exon // 1	cel-mir-240 // X:7882574-7882670 (+) /// cel-mir-786 // X:7882703-7882792 (+)
20500521	1.24616	0	A	1.24616	0	A	1.41894	0.18732	A	1.06562	-0.2258	A	1.24616	0	A	1.24616	0	A	1.30375	1.18598	1.0993	0.136591	0.231864	AA	0	miRNA	miRBase	Caenorhabditis elegans	cel-miR-241-5p	V:14366233-14366253 (-)	21	UGAGGUAGGUGCGAGAAAUGA	MIMAT0000297_st	MIMAT0000297	F56A12.4 // sense // exon // 1	cel-mir-48 // V:14364397-14364494 (-) /// cel-mir-241 // V:14366173-14366268 (-)
20500522	1.10741	-0.05788	A	1.11446	-0.04872	A	1.08351	-0.08936	A	1.28831	0.16041	A	1.19102	0.04713	A	1.41614	0.2969	A	1.10179	1.29849	0.848519	-0.236981	0.0332975	AA	0	miRNA	miRBase	Caenorhabditis elegans	cel-miR-241-3p	V:14366188-14366209 (-)	22	AUUGUCUCUCAGCUGCUUCAUC	MIMAT0020335_st	MIMAT0020335	F56A12.4 // sense // exon // 1	cel-mir-48 // V:14364397-14364494 (-) /// cel-mir-241 // V:14366173-14366268 (-)
20500523	1.05048	0	A	1.20467	0.19758	A	1.05048	0	A	1.05048	0	A	1.05048	0	A	1.22847	0.2258	A	1.10188	1.10981	0.992852	-0.01035	0.929575	AA	0	miRNA	miRBase	Caenorhabditis elegans	cel-miR-242	IV:4274255-4274275 (+)	21	UUGCGUAGGCCUUUGCUUCGA	MIMAT0000298_st	MIMAT0000298	F36A4.16 // sense // exon // 1	---
20500524	1.38283	0.22176	A	1.18248	-0.00405	A	1.18912	0.00404	A	1.0519	-0.17286	A	1.07628	-0.13981	A	1.4163	0.25627	A	1.25148	1.18149	1.05923	0.0830199	0.585307	AA	0	miRNA	miRBase	Caenorhabditis elegans	cel-miR-243-5p	IV:4450791-4450809 (+)	19	UAUCUCGGUGCGAUCGUAC	MIMAT0015117_st	MIMAT0015117	R08C7.12b // sense // intron // 1 /// R08C7.14 // sense // exon // 1	---
20500525	1.33896	-0.35213	A	1.48402	-0.20373	A	1.65308	-0.04809	A	4.14806	1.27919	P	3.30073	0.94954	P	1.76515	0.04654	A	1.49202	3.07131	0.485792	-1.04159	0.0643935	PA	0	miRNA	miRBase	Caenorhabditis elegans	cel-miR-243-3p	IV:4450832-4450854 (+)	23	CGGUACGAUCGCGGCGGGAUAUC	MIMAT0000299_st	MIMAT0000299	R08C7.12b // sense // intron // 1 /// R08C7.14 // sense // exon // 1	---
20500526	0.98241	-0.25431	A	1.00182	-0.22608	A	1.1947	0.02795	A	1.14886	-0.0285	A	1.22847	0.06816	A	1.31359	0.16481	A	1.05964	1.23031	0.861284	-0.215439	0.107002	AA	0	miRNA	miRBase	Caenorhabditis elegans	cel-miR-244-5p	I:4684377-4684400 (-)	24	UCUUUGGUUGUACAAAGUGGUAUG	MIMAT0000300_st	MIMAT0000300	T04D1.5 // sense // exon // 1	---
20500527	1.08151	0	A	1.08151	0	A	1.16822	0.11127	A	0.98791	-0.13059	A	1.44146	0.41449	A	1.0156	-0.09071	A	1.11041	1.14832	0.966987	-0.0484321	0.886333	AA	0	miRNA	miRBase	Caenorhabditis elegans	cel-miR-244-3p	I:4684338-4684358 (-)	21	UACUGCUUUUCAGCUAAAGGA	MIMAT0015118_st	MIMAT0015118	T04D1.5 // sense // exon // 1	---
20500528	1.17621	0.04217	A	1.02159	-0.16115	A	1.37549	0.26798	A	1.22847	0.10489	A	0.89683	-0.34906	A	1.10844	-0.04344	A	1.1911	1.07791	1.105	0.144049	0.469307	AA	0	miRNA	miRBase	Caenorhabditis elegans	cel-miR-245-5p	I:7887385-7887407 (+)	23	GCUAUUUGCAAGGUACCUAAUUG	MIMAT0020336_st	MIMAT0020336	F55D12.7 // sense // exon // 1	---
20500529	1.22847	0.10346	A	1.04258	-0.13324	A	1.05845	-0.11145	A	0.98619	-0.21346	A	1.40376	0.29589	A	1.23778	0.11435	A	1.10983	1.20924	0.917792	-0.123762	0.537078	AA	0	miRNA	miRBase	Caenorhabditis elegans	cel-miR-245-3p	I:7887426-7887447 (+)	22	AUUGGUCCCCUCCAAGUAGCUC	MIMAT0000301_st	MIMAT0000301	F55D12.7 // sense // exon // 1	---
20500530	1.08146	0	A	1.08146	0	A	1.26469	0.2258	A	0.98779	-0.13071	A	1.19328	0.14195	A	0.96654	-0.16209	A	1.14254	1.0492	1.08896	0.122946	0.363047	AA	0	miRNA	miRBase	Caenorhabditis elegans	cel-miR-246-5p	IV:10940131-10940153 (+)	23	CGCCUAACCGUUGUCAUGUAAUA	MIMAT0020337_st	MIMAT0020337	ZK593.10 // sense // exon // 1	---
20500531	1.40567	0.30431	A	1.03405	-0.13864	A	1.13836	0	A	1.13836	0	A	1.38787	0.28592	A	1.136	-0.003	A	1.19269	1.22074	0.977022	-0.0335368	0.821355	AA	0	miRNA	miRBase	Caenorhabditis elegans	cel-miR-246-3p	IV:10940173-10940193 (+)	21	UUACAUGUUUCGGGUAGGAGC	MIMAT0000302_st	MIMAT0000302	ZK593.10 // sense // exon // 1	---
20500532	1.2984	0	A	1.41303	0.12205	A	1.3588	0.0656	A	1.2083	-0.10375	A	1.18392	-0.13317	A	1.2984	0	A	1.35674	1.23021	1.10286	0.141247	0.0576147	AA	0	miRNA	miRBase	Caenorhabditis elegans	cel-miR-247-5p	X:4756961-4756982 (+)	22	UAGAGAAAAGUUUCUAAUUACC	MIMAT0015119_st	MIMAT0015119	C39E6.7 // sense // exon // 1	cel-mir-247 // X:4756941-4757038 (+) /// cel-mir-797 // X:4757079-4757167 (+)
20500533	0.95831	-0.40584	A	1.651	0.37893	A	1.22499	-0.05164	P	1.43254	0.17417	A	1.08812	-0.22257	A	1.31427	0.04985	A	1.2781	1.27831	0.999836	-0.000237025	0.921863	PA	0	miRNA	miRBase	Caenorhabditis elegans	cel-miR-247-3p	X:4757001-4757022 (+)	22	UGACUAGAGCCUAUUCUCUUCU	MIMAT0000303_st	MIMAT0000303	C39E6.7 // sense // exon // 1	cel-mir-247 // X:4756941-4757038 (+) /// cel-mir-797 // X:4757079-4757167 (+)
20500534	1.55789	0.16449	A	1.22847	-0.17824	A	1.46066	0.07153	A	1.35063	-0.04146	A	1.05751	-0.39443	A	1.42939	0.0403	A	1.41567	1.27918	1.10671	0.146273	0.419529	AA	0	miRNA	miRBase	Caenorhabditis elegans	cel-miR-248	X:2262380-2262403 (-)	24	AUACACGUGCACGGAUAACGCUCA	MIMAT0000304_st	MIMAT0000304	AH9.5 // sense // exon // 1	---
20500535	1.09695	-0.25431	A	1.33399	0.02795	A	1.2828	-0.0285	A	1.09695	-0.25431	A	1.48402	0.18171	A	1.52527	0.22126	A	1.23791	1.36875	0.904414	-0.144945	0.485142	AA	0	miRNA	miRBase	Caenorhabditis elegans	cel-miR-249-5p	X:3006487-3006510 (-)	24	AGCAACGCACAAACGUCUUCUGUG	MIMAT0020338_st	MIMAT0020338	Y48D7A.3 // sense // exon // 1	cel-mir-249 // X:3006430-3006526 (-) /// cel-mir-359 // X:3004281-3004390 (+) /// cel-mir-785 // X:3004658-3004751 (+)
20500536	1.05048	0	A	1.05048	0	A	1.05048	0	A	1.05048	0	A	1.22847	0.2258	A	1.05048	0	A	1.05048	1.10981	0.94654	-0.079264	0.373901	AA	0	miRNA	miRBase	Caenorhabditis elegans	cel-miR-249-3p	X:3006444-3006466 (-)	23	UCACAGGACUUUUGAGCGUUGCC	MIMAT0000305_st	MIMAT0000305	Y48D7A.3 // sense // exon // 1	cel-mir-249 // X:3006430-3006526 (-) /// cel-mir-359 // X:3004281-3004390 (+) /// cel-mir-785 // X:3004658-3004751 (+)
20500537	1.0587	-0.1692	A	1.27894	0.10346	A	1.28863	0.11435	A	1.36071	0.19287	A	1.0587	-0.1692	A	1.10194	-0.11145	A	1.20876	1.17378	1.0298	0.0423577	0.770541	AA	0	miRNA	miRBase	Caenorhabditis elegans	cel-miR-250-5p	V:11769959-11769980 (-)	22	CCUUCAGUUGCCUCGUGAUCCG	MIMAT0020339_st	MIMAT0020339	F55A11.12 // sense // exon // 1 /// F55A11.3.1 // antisense // exon // 6 /// F55A11.3.2 // antisense // exon // 6	cel-mir-61 // V:11770042-11770138 (-) /// cel-mir-250 // V:11769899-11769997 (-)
20500538	1.34487	0	A	1.69276	0.33191	A	1.34487	0	A	1.25529	-0.09944	A	1.34487	0	A	1.33954	-0.00572	A	1.46083	1.31323	1.11239	0.153668	0.274785	AA	0	miRNA	miRBase	Caenorhabditis elegans	cel-miR-250-3p	V:11769919-11769938 (-)	20	AAUCACAGUCAACUGUUGGC	MIMAT0000306_st	MIMAT0000306	F55A11.12 // sense // exon // 1 /// F55A11.3.1 // antisense // exon // 6 /// F55A11.3.2 // antisense // exon // 6	cel-mir-61 // V:11770042-11770138 (-) /// cel-mir-250 // V:11769899-11769997 (-)
20500539	1.33006	0.04898	A	1.29585	0.0114	A	1.24053	-0.05155	A	1.27546	-0.01149	A	1.03751	-0.30938	A	2.2492	0.80691	P	1.28881	1.52072	0.8475	-0.238714	0.659678	PA	0	miRNA	miRBase	Caenorhabditis elegans	cel-miR-251	X:11004680-11004703 (+)	24	UUAAGUAGUGGUGCCGCUCUUAUU	MIMAT0000307_st	MIMAT0000307	F59F3.7 // sense // exon // 1	---
20500540	1.09603	-0.28767	A	1.54836	0.21079	A	1.2151	-0.13888	A	1.46066	0.12667	A	1.75041	0.38774	P	1.2151	-0.13888	A	1.2865	1.47539	0.871971	-0.197649	0.405117	PA	0	miRNA	miRBase	Caenorhabditis elegans	cel-miR-252-5p	II:11446854-11446876 (-)	23	AUAAGUAGUAGUGCCGCAGGUAA	MIMAT0000308_st	MIMAT0000308	W02B12.13a // antisense // 3UTR // 4 /// W02B12.13b // antisense // 3UTR // 4 /// W02B12.14 // sense // exon // 1 /// W02B12.17 // antisense // exon // 1	---
20500541	1.08788	-0.21303	A	0.96317	-0.38869	A	1.36345	0.11272	P	1.80257	0.51551	P	1.22847	-0.03769	A	1.2935	0.03673	A	1.13817	1.44151	0.789564	-0.340872	0.21491	PA	0	miRNA	miRBase	Caenorhabditis elegans	cel-miR-252-3p	II:11446819-11446837 (-)	19	CUUACCUACUGCCUUCUGC	MIMAT0020340_st	MIMAT0020340	W02B12.13a // antisense // 3UTR // 4 /// W02B12.13b // antisense // 3UTR // 4 /// W02B12.14 // sense // exon // 1 /// W02B12.17 // antisense // exon // 1	---
20500542	1.22847	0	A	1.22847	0	A	1.20819	-0.02401	A	1.46066	0.24977	A	1.18956	-0.04643	A	1.33468	0.11964	A	1.22171	1.3283	0.919755	-0.120679	0.250261	AA	0	miRNA	miRBase	Caenorhabditis elegans	cel-miR-253-5p	V:5780552-5780572 (-)	21	CACACCUCACUAACACUGACC	MIMAT0000309_st	MIMAT0000309	F44E7.11 // sense // exon // 1 /// F44E7.15 // antisense // exon // 1 /// F44E7.5a // sense // intron // 1 /// F44E7.5b // sense // intron // 1	---
20500543	4.63287	1.14123	P	1.78026	-0.23859	A	2.87809	0.45444	P	2.42057	0.20467	P	1.78026	-0.23859	A	1.25702	-0.74067	A	3.09707	1.81928	1.70236	0.767535	0.215171	PA	0	miRNA	miRBase	Caenorhabditis elegans	cel-miR-253-3p	V:5780515-5780536 (-)	22	UUAGUAGGCGUUGUGGGAAGGG	MIMAT0004215_st	MIMAT0004215	F44E7.11 // sense // exon // 1 /// F44E7.15 // antisense // exon // 1 /// F44E7.5a // sense // intron // 1 /// F44E7.5b // sense // intron // 1	---
20500544	1.07636	-0.23248	A	1.10272	-0.19758	A	1.26457	0	A	1.26457	0	A	1.26457	0	A	1.41896	0.16619	A	1.14788	1.31603	0.87223	-0.19722	0.0946884	AA	0	miRNA	miRBase	Caenorhabditis elegans	cel-miR-254	X:11333486-11333508 (-)	23	UGCAAAUCUUUCGCGACUGUAGG	MIMAT0000310_st	MIMAT0000310	ZK455.2 // sense // intron // 20 /// ZK455.9 // sense // exon // 1	---
20500545	1.05048	-0.12095	A	1.22847	0.10486	A	1.05623	-0.11308	A	1.22847	0.10486	A	0.96105	-0.24931	A	1.46066	0.35462	A	1.11173	1.21673	0.913703	-0.130203	0.584032	AA	0	miRNA	miRBase	Caenorhabditis elegans	cel-miR-255-5p	V:5440647-5440668 (+)	22	GUAAGAAAUCUUUGUAGUUCUC	MIMAT0020341_st	MIMAT0020341	F08F3.11 // sense // exon // 1	---
20500546	1.34398	0.1973	A	0.91239	-0.36148	A	1.13478	-0.0468	A	1.19512	0.02795	A	1.14926	-0.0285	A	1.19512	0.02795	A	1.13038	1.17983	0.958087	-0.061771	0.651091	AA	0	miRNA	miRBase	Caenorhabditis elegans	cel-miR-255-3p	V:5440684-5440705 (+)	22	AAACUGAAGAGAUUUUUUACAG	MIMAT0004216_st	MIMAT0004216	F08F3.11 // sense // exon // 1	---
20500547	1.33223	0.06554	A	1.26648	-0.00749	A	1.27966	0.00745	A	1.13922	-0.16027	A	1.12877	-0.17356	A	1.46011	0.19776	A	1.29279	1.2427	1.04031	0.0570099	0.615718	AA	0	miRNA	miRBase	Caenorhabditis elegans	cel-miR-256	V:6956040-6956060 (-)	21	UGGAAUGCAUAGAAGACUGUA	MIMAT0000311_st	MIMAT0000311	T07H8.8 // sense // exon // 1	---
20500548	1.75933	0.51817	A	1.22847	0	A	1.21876	-0.01145	A	1.22847	0	A	1.08362	-0.181	A	2.21418	0.84992	P	1.40219	1.50876	0.929366	-0.105682	0.888703	PA	0	miRNA	miRBase	Caenorhabditis elegans	cel-miR-257	V:17140659-17140680 (+)	22	GAGUAUCAGGAGUACCCAGUGA	MIMAT0000312_st	MIMAT0000312	Y102A5D.4 // sense // exon // 1 /// Y61B8A.6 // sense // intron // 1	---
20500549	1.21253	0	A	1.21253	0	A	1.21253	0	A	1.21253	0	A	0.94857	-0.3542	A	1.3905	0.19758	A	1.21253	1.18387	1.02421	0.0345138	0.762558	AA	0	miRNA	miRBase	Caenorhabditis elegans	cel-miR-258	X:227958-227978 (+) /// X:237374-237394 (+)	21	GGUUUUGAGAGGAAUCCUUUU	MIMAT0000313_st	MIMAT0000313	---	cel-mir-258-1 // X:227953-228048 (+) /// cel-mir-258-2 // X:237369-237464 (+) /// cel-mir-258-1 // X:227953-228048 (+) /// cel-mir-258-2 // X:237369-237464 (+)
20500550	1.05048	-0.16935	A	1.38148	0.2258	A	1.37076	0.21456	A	1.18133	0	A	1.18133	0	A	1.18133	0	A	1.26757	1.18133	1.07301	0.101657	0.525022	AA	0	miRNA	miRBase	Caenorhabditis elegans	cel-miR-259-5p	V:10539062-10539083 (-)	22	AAAUCUCAUCCUAAUCUGGUAG	MIMAT0000314_st	MIMAT0000314	F25D1.6 // sense // exon // 1 /// F25D1.9 // antisense // exon // 1	---
20500551	1.25046	-0.04429	A	1.76653	0.45417	A	1.07346	-0.26448	A	1.25046	-0.04429	A	1.32844	0.04297	A	1.46066	0.17987	A	1.36348	1.34652	1.0126	0.0180614	0.962742	AA	0	miRNA	miRBase	Caenorhabditis elegans	cel-miR-259-3p	V:10539022-10539045 (-)	24	CCACCGAUUUGGCAUGGGAUUGAC	MIMAT0020342_st	MIMAT0020342	F25D1.6 // sense // exon // 1 /// F25D1.9 // antisense // exon // 1	---
20500552	1.18589	0	A	1.4326	0.27266	A	1.41004	0.24977	A	1.07979	-0.13522	A	0.96712	-0.29421	A	1.18589	0	A	1.34284	1.0776	1.24614	0.317469	0.0598387	AA	0	miRNA	miRBase	Caenorhabditis elegans	cel-miR-260	II:3306306-3306325 (+)	20	GUGAUGUCGAACUCUUGUAG	MIMAT0000315_st	MIMAT0000315	F39E9.13 // sense // exon // 1 /// F39E9.21 // sense // exon // 1 /// F39E9.7 // antisense // 3UTR // 3	---
20500553	1.24693	0.13706	A	1.1266	-0.00934	A	1.33954	0.24042	A	1.1266	-0.00934	A	1.14124	0.00928	A	1.1266	-0.00934	A	1.23769	1.13148	1.09387	0.129439	0.158588	AA	0	miRNA	miRBase	Caenorhabditis elegans	cel-miR-261	II:5969098-5969116 (+)	19	UAGCUUUUUAGUUUUCACG	MIMAT0000316_st	MIMAT0000316	B0034.4 // antisense // 5UTR // 1 /// B0034.6 // sense // exon // 1	---
20500554	0.95989	-0.27267	A	1.15554	-0.00504	A	1.15554	-0.00504	A	1.35132	0.22077	A	1.16362	0.00502	A	1.35663	0.22643	A	1.09032	1.29052	0.844869	-0.2432	0.100576	AA	0	miRNA	miRBase	Caenorhabditis elegans	cel-miR-262	V:18736728-18736747 (+)	20	GUUUCUCGAUGUUUUCUGAU	MIMAT0000317_st	MIMAT0000317	ZK384.5 // sense // exon // 1	---
20500555	2.27767	0.37189	P	1.34416	-0.38896	A	2.43205	0.4665	P	1.33954	-0.39393	A	2.17606	0.30605	P	1.33954	-0.39393	A	2.01796	1.61838	1.2469	0.318347	0.434149	PA	0	miRNA	miRBase	Homo sapiens	hsa-miR-200b-5p	chr1:1102504-1102525 (+)	22	CAUCUUACUGGGCAGCAUUGGA	MIMAT0004571_st	MIMAT0004571	---	hsa-mir-200b // chr1:1102484-1102578 (+) /// hsa-mir-200a // chr1:1103243-1103332 (+) /// hsa-mir-429 // chr1:1104385-1104467 (+)
20500556	1.42831	0.22707	A	1.20005	-0.02415	A	1.66519	0.44845	A	1.11737	-0.12713	A	1.06736	-0.19319	A	1.24056	0.02375	A	1.43118	1.14176	1.25349	0.325945	0.104292	AA	0	miRNA	miRBase	Homo sapiens	hsa-miR-200b-3p	chr1:1102540-1102561 (+)	22	UAAUACUGCCUGGUAAUGAUGA	MIMAT0000318_st	MIMAT0000318	---	hsa-mir-200b // chr1:1102484-1102578 (+) /// hsa-mir-200a // chr1:1103243-1103332 (+) /// hsa-mir-429 // chr1:1104385-1104467 (+)
20500557	1.49332	0.28162	A	1.23825	0.0114	A	1.00207	-0.29392	A	1.07336	-0.19476	A	1.23825	0.0114	A	1.21876	-0.01149	A	1.24455	1.17679	1.05758	0.0807634	0.735655	AA	0	miRNA	miRBase	Drosophila melanogaster	dme-miR-263a-5p	2L:11953466-11953489 (-)	24	AAUGGCACUGGAAGAAUUCACGGG	MIMAT0000319_st	MIMAT0000319	FBtr0306899 // sense // exon // 2	---
20500558	1.39283	-0.01942	A	1.45346	0.04206	A	1.43058	0.01916	A	1.0835	-0.38174	A	1.35978	-0.05407	A	1.45885	0.04739	A	1.42562	1.30071	1.09603	0.132294	0.334254	AA	0	miRNA	miRBase	Drosophila melanogaster	dme-miR-263a-3p	2L:11953424-11953445 (-)	22	CGUGAUCUCUUAGUGGCAUCUA	MIMAT0020799_st	MIMAT0020799	FBtr0306899 // sense // exon // 2	---
20500559	1.6808	0.18559	P	1.35834	-0.12171	A	1.50962	0.03062	A	1.46066	-0.01694	A	1.48402	0.00596	A	1.4718	-0.00598	A	1.51625	1.47216	1.02995	0.0425763	0.697649	PA	0	miRNA	miRBase	Caenorhabditis elegans	cel-miR-264	X:2819305-2819324 (+)	20	GGCGGGUGGUUGUUGUUAUG	MIMAT0000320_st	MIMAT0000320	C14A11.8 // sense // exon // 1	---
20500560	2.37282	-0.08312	P	27.2646	3.43923	P	6.95265	1.46784	P	2.65427	0.07859	P	1.44291	-0.80074	P	1.05921	-1.24673	A	12.1967	1.7188	7.09606	2.82702	0.106589	PA	0	miRNA	miRBase	Caenorhabditis elegans	cel-miR-265	IV:12740427-12740446 (-)	20	UGAGGGAGGAAGGGUGGUAU	MIMAT0000321_st	MIMAT0000321	T23F6.5 // sense // intron // 1 /// T23F6.6 // sense // exon // 1	---
20500561	1.22847	0.12927	A	1.05048	-0.09654	A	1.06504	-0.07669	A	1.18133	0.07282	A	0.93626	-0.26261	A	1.26635	0.17308	A	1.11466	1.12798	0.988194	-0.0171335	0.954693	AA	0	miRNA	miRBase	Caenorhabditis elegans	cel-miR-266	X:3755156-3755175 (+)	20	AGGCAAGACUUUGGCAAAGC	MIMAT0000322_st	MIMAT0000322	T14G12.7 // sense // exon // 1	---
20500562	1.22847	0	A	1.22847	0	A	1.22847	0	A	1.05048	-0.2258	A	1.48402	0.27266	A	1.22847	0	A	1.22847	1.25432	0.979389	-0.0300467	0.918914	AA	0	miRNA	miRBase	Caenorhabditis elegans	cel-miR-267	II:12638126-12638145 (-)	20	CCCGUGAAGUGUCUGCUGCA	MIMAT0000323_st	MIMAT0000323	Y38E10A.18 // antisense // intron // 6 /// Y38E10A.27 // sense // exon // 1	---
20500563	1.35967	0.1464	A	1.05048	-0.2258	A	1.22847	0	A	1.22847	0	A	1.22847	0	A	1.05048	-0.2258	A	1.21287	1.16914	1.03741	0.0529812	0.730058	AA	0	miRNA	miRBase	Caenorhabditis elegans	cel-miR-268	V:11137109-11137132 (+)	24	GGCAAGAAUUAGAAGCAGUUUGGU	MIMAT0000324_st	MIMAT0000324	C06H2.5b // sense // intron // 1 /// C06H2.8 // sense // exon // 1	---
20500564	1.5327	0.19796	A	1.48921	0.15643	A	1.82185	0.44729	P	1.18315	-0.17548	A	1.13731	-0.23249	A	1.07491	-0.3139	A	1.61459	1.13179	1.42658	0.512559	0.0069158	PA	0	miRNA	miRBase	Caenorhabditis elegans	cel-miR-269	IV:273912-273931 (+)	20	GGCAAGACUCUGGCAAAACU	MIMAT0000325_st	MIMAT0000325	---	---
20500565	1.27475	0.10449	A	1.16518	-0.02517	A	1.20619	0.02473	A	1.09556	-0.11405	A	1.15173	-0.04192	A	1.26109	0.08894	A	1.21537	1.16946	1.03926	0.055557	0.463319	AA	0	miRNA	miRBase	Caenorhabditis elegans	cel-miR-270	IV:3258464-3258483 (-)	20	GGCAUGAUGUAGCAGUGGAG	MIMAT0000326_st	MIMAT0000326	T26C12.5 // sense // exon // 1	---
20500566	3.78401	1.18498	P	1.64603	-0.01594	A	3.60691	1.11583	P	1.6048	-0.05254	A	1.49614	-0.15369	A	1.68261	0.01577	A	3.01232	1.59452	1.88917	0.917754	0.10333	PA	0	miRNA	miRBase	Caenorhabditis elegans	cel-miR-271	X:3412013-3412032 (+)	20	UCGCCGGGUGGGAAAGCAUU	MIMAT0000327_st	MIMAT0000327	C04F6.6 // sense // exon // 1 /// C04F6.8 // antisense // exon // 1	---
20500567	1.22847	-0.2261	A	1.22847	-0.2261	A	1.67699	0.22292	P	1.43135	-0.00558	A	1.48402	0.04656	A	1.44245	0.00556	A	1.37798	1.45261	0.948623	-0.0760926	0.574305	PA	0	miRNA	miRBase	Caenorhabditis elegans	cel-miR-272	III:11637877-11637894 (-)	18	UGUAGGCAUGGGUGUUUG	MIMAT0000328_st	MIMAT0000328	---	---
20500568	1.31356	-0.00892	A	1.34293	0.02297	A	1.18559	-0.15681	A	1.18277	-0.16024	A	1.32987	0.00887	A	1.64852	0.31876	A	1.28069	1.38705	0.923319	-0.115098	0.530641	AA	0	miRNA	miRBase	Caenorhabditis elegans	cel-miR-273	II:14947021-14947040 (+)	20	UGCCCGUACUGUGUCGGCUG	MIMAT0000329_st	MIMAT0000329	E01F3.1b // sense // intron // 4 /// E01F3.1c // sense // intron // 2 /// E01F3.1e // sense // intron // 5 /// E01F3.2 // sense // exon // 1	---
20500569	1.22847	-0.00715	A	1.23335	-0.00143	A	0.92488	-0.41667	A	1.49263	0.27385	A	1.2358	0.00143	A	1.46066	0.24261	A	1.1289	1.39636	0.808457	-0.306757	0.124618	AA	0	miRNA	miRBase	Drosophila melanogaster	dme-miR-184-5p	2R:9216965-9216985 (-)	21	CCUUAUCAUUCUCUCGCCCCG	MIMAT0000330_st	MIMAT0000330	---	---
20500570	1.29521	-0.11124	A	1.50285	0.10327	A	1.51617	0.11601	A	1.28511	-0.12253	A	1.50285	0.10327	A	1.14059	-0.29465	A	1.43808	1.30952	1.09817	0.135106	0.361932	AA	0	miRNA	miRBase	Drosophila melanogaster	dme-miR-184-3p	2R:9216925-9216946 (-)	22	UGGACGGAGAACUGAUAAGGGC	MIMAT0000331_st	MIMAT0000331	---	---
20500571	1.08491	-0.08161	A	1.01865	-0.17253	A	1.21119	0.07724	A	1.46066	0.34744	A	1.06131	-0.11333	A	1.23512	0.10546	A	1.10492	1.25236	0.882265	-0.180716	0.320031	AA	0	miRNA	miRBase	Drosophila melanogaster	dme-miR-274-5p	3L:11650036-11650061 (+)	23	UUUGUGACCGACACUAACGGGUA	MIMAT0000332_st	MIMAT0000332	FBtr0076133 // antisense // intron // 4	---
20500572	1.10688	0	A	0.83999	-0.39805	A	1.19698	0.1129	A	1.10688	0	A	1.02356	-0.1129	A	1.16798	0.07752	A	1.04795	1.09947	0.953138	-0.0692427	0.639461	AA	0	miRNA	miRBase	Drosophila melanogaster	dme-miR-274-3p	3L:11650081-11650103 (+)	23	CUCGUUUUUGCGAUCACAAAUUA	MIMAT0020800_st	MIMAT0020800	FBtr0076133 // antisense // intron // 4	---
20500573	1.25773	-0.07266	A	1.22847	-0.10663	A	1.47083	0.15314	A	1.38767	0.06917	A	1.48402	0.16603	A	0.97141	-0.44534	A	1.31901	1.28103	1.02965	0.0421475	0.781242	AA	0	miRNA	miRBase	Drosophila melanogaster	dme-miR-275-5p	2L:7425814-7425836 (+)	23	CGCGCUAAUCAGUGACCGGGGCU	MIMAT0020801_st	MIMAT0020801	FBtr0332524 // sense // exon // 2 /// FBtr0332525 // sense // exon // 2	dme-mir-275 // 2L:7425795-7425892 (+) /// dme-mir-305 // 2L:7425972-7426044 (+)
20500574	1.42315	0.16059	A	1.2713	-0.0022	A	1.36752	0.10306	A	0.92913	-0.45454	A	1.15013	-0.14671	A	1.27517	0.00219	A	1.35399	1.11814	1.21093	0.276112	0.11475	AA	0	miRNA	miRBase	Drosophila melanogaster	dme-miR-275-3p	2L:7425853-7425875 (+)	23	UCAGGUACCUGAAGUAGCGCGCG	MIMAT0000333_st	MIMAT0000333	FBtr0332524 // sense // exon // 2 /// FBtr0332525 // sense // exon // 2	dme-mir-275 // 2L:7425795-7425892 (+) /// dme-mir-305 // 2L:7425972-7426044 (+)
20500575	1.53897	0.20659	A	1.06353	-0.32652	A	1.67699	0.3305	P	1.18849	-0.16625	A	1.18849	-0.16625	A	1.4788	0.14905	A	1.4265	1.28526	1.10989	0.150416	0.594367	PA	0	miRNA	miRBase	Drosophila melanogaster	dme-miR-92a-5p	3R:21472244-21472265 (+)	22	AGGACGGGAAGGUGUCAACGUU	MIMAT0020802_st	MIMAT0020802	FBtr0084886 // sense // intron // 1 /// FBtr0084887 // sense // intron // 1 /// FBtr0084888 // sense // intron // 1 /// FBtr0084889 // sense // intron // 1 /// FBtr0113287 // sense // intron // 1	dme-mir-92a // 3R:21472228-21472322 (+) /// dme-mir-92b // 3R:21477120-21477219 (+)
20500576	157.256	2.92422	P	8.88129	-1.22198	P	30.836	0.5738	P	10.5981	-0.96701	P	328.908	3.98879	P	2.00358	-3.37017	P	65.6577	113.836	0.576772	-0.793926	0.741775	PP	0	miRNA	miRBase	Drosophila melanogaster	dme-miR-92a-3p	3R:21472282-21472303 (+)	22	CAUUGCACUUGUCCCGGCCUAU	MIMAT0000334_st	MIMAT0000334	FBtr0084886 // sense // intron // 1 /// FBtr0084887 // sense // intron // 1 /// FBtr0084888 // sense // intron // 1 /// FBtr0084889 // sense // intron // 1 /// FBtr0113287 // sense // intron // 1	dme-mir-92a // 3R:21472228-21472322 (+) /// dme-mir-92b // 3R:21477120-21477219 (+)
20500577	1.09043	-0.124	A	1.51108	0.34669	A	1.12112	-0.08394	A	1.4189	0.25589	A	1.0814	-0.13599	A	1.25546	0.07933	A	1.24088	1.25192	0.991179	-0.0127826	0.919994	AA	0	miRNA	miRBase	Drosophila melanogaster	dme-miR-219-5p	3L:17308124-17308146 (+)	21	UGAUUGUCCAAACGCAAUUCU	MIMAT0000335_st	MIMAT0000335	---	---
20500578	1.89188	0.54812	A	1.03603	-0.32064	A	1.65859	0.35825	A	1.39493	0.10849	A	1.19283	-0.11731	A	1.17855	-0.13469	A	1.52883	1.25544	1.21777	0.284242	0.426793	AA	0	miRNA	miRBase	Drosophila melanogaster	dme-miR-219-3p	3L:17308164-17308185 (+)	22	AGGGUUGCGACUGGGCAUCGCG	MIMAT0020803_st	MIMAT0020803	---	---
20500579	1.05048	-0.16364	A	0.98568	-0.2555	A	1.18133	0.00571	A	1.19961	0.02787	A	1.19074	0.01716	A	1.17199	-0.00573	A	1.0725	1.18745	0.903196	-0.14689	0.122085	AA	0	miRNA	miRBase	Drosophila melanogaster	dme-miR-276a-5p	3L:10358343-10358365 (+)	23	CAGCGAGGUAUAGAGUUCCUACG	MIMAT0000336_st	MIMAT0000336	---	---
20500580	1.1465	-0.13302	A	1.14671	-0.13275	A	1.56509	0.316	A	1.15127	-0.12703	A	1.38526	0.1399	A	1.3632	0.11674	A	1.2861	1.29991	0.989376	-0.0154089	0.885346	AA	0	miRNA	miRBase	Drosophila melanogaster	dme-miR-276a-3p	3L:10358381-10358402 (+)	22	UAGGAACUUCAUACCGUGCUCU	MIMAT0000337_st	MIMAT0000337	---	---
20500581	1.44285	0.10694	A	1.05048	-0.35094	A	1.44728	0.11136	A	1.23381	-0.11887	A	1.74709	0.38296	A	1.2367	-0.1155	A	1.31354	1.40587	0.934325	-0.0980033	0.700223	AA	0	miRNA	miRBase	Drosophila melanogaster	dme-miR-277-5p	3R:5925761-5925781 (+)	21	CGUGUCAGGAGUGCAUUUGCA	MIMAT0020804_st	MIMAT0020804	FBtr0309197 // sense // exon // 1	dme-mir-277 // 3R:5925744-5925843 (+) /// dme-mir-34 // 3R:5926658-5926756 (+) /// dme-mir-317 // 3R:5916848-5916939 (+)
20500582	1.23335	-0.21855	A	1.44651	0.01145	A	1.42373	-0.01145	A	1.43508	0	A	1.44651	0.01145	A	1.43508	0	A	1.36786	1.43889	0.950638	-0.0730322	0.35434	AA	0	miRNA	miRBase	Drosophila melanogaster	dme-miR-277-3p	3R:5925802-5925824 (+)	23	UAAAUGCACUAUCUGGUACGACA	MIMAT0000338_st	MIMAT0000338	FBtr0309197 // sense // exon // 1	dme-mir-277 // 3R:5925744-5925843 (+) /// dme-mir-34 // 3R:5926658-5926756 (+) /// dme-mir-317 // 3R:5916848-5916939 (+)
20500583	1.136	0	A	1.136	0	A	1.136	0	A	1.05048	-0.1129	A	1.136	0	A	1.22847	0.1129	A	1.136	1.13832	0.997965	-0.00293912	0.999997	AA	0	miRNA	miRBase	Drosophila melanogaster	dme-miR-278-5p	2R:11544588-11544610 (+)	23	CCGGAUGAUGGUUCACAACGACC	MIMAT0020805_st	MIMAT0020805	---	---
20500584	1.17381	-0.02984	A	1.24553	0.05572	A	1.22287	0.02924	A	1.05792	-0.17981	A	1.04618	-0.19591	A	1.22287	0.02924	A	1.21407	1.10899	1.09475	0.130605	0.156272	AA	0	miRNA	miRBase	Drosophila melanogaster	dme-miR-278-3p	2R:11544627-11544648 (+)	22	UCGGUGGGACUUUCGUCCGUUU	MIMAT0000339_st	MIMAT0000339	---	---
20500585	0.93216	-0.30406	A	1.24286	0.11096	A	1.07324	-0.10073	A	1.03689	-0.15045	A	1.22847	0.09415	A	1.24286	0.11096	A	1.08275	1.16941	0.9259	-0.111072	0.472469	AA	0	miRNA	miRBase	Drosophila melanogaster	dme-miR-133-5p	2L:20616635-20616657 (+)	23	AGCUGGUUGACAUCGGGUCAGAU	MIMAT0020806_st	MIMAT0020806	---	dme-mir-133 // 2L:20616617-20616714 (+) /// dme-mir-288 // 2L:20618366-20618462 (-)
20500586	10.4031	3.06512	P	1.14592	-0.11732	A	5.44075	2.12999	P	1.03011	-0.27102	A	1.34007	0.10849	A	1.10131	-0.1746	A	5.66324	1.15716	4.89407	2.29104	0.130605	PA	0	miRNA	miRBase	Drosophila melanogaster	dme-miR-133-3p	2L:20616673-20616694 (+)	22	UUGGUCCCCUUCAACCAGCUGU	MIMAT0000340_st	MIMAT0000340	---	dme-mir-133 // 2L:20616617-20616714 (+) /// dme-mir-288 // 2L:20618366-20618462 (-)
20500587	6.79575	1.31076	P	2.08015	-0.39718	A	8.33429	1.60519	P	1.79245	-0.61194	A	3.39869	0.31111	P	1.83754	-0.5761	A	5.73673	2.34289	2.44857	1.29194	0.177919	PA	0	miRNA	miRBase	Drosophila melanogaster	dme-miR-279-5p	3R:25041328-25041353 (+)	26	AGUGGGUGGGGGUCCAGUGUUUCACA	MIMAT0020807_st	MIMAT0020807	FBtr0085391 // sense // exon // 1 /// FBtr0303426 // sense // intron // 2 /// FBtr0303427 // sense // exon // 2	dme-mir-279 // 3R:25041307-25041406 (+) /// dme-mir-996 // 3R:25042906-25043002 (+)
20500588	1.35967	0.18069	A	1.21836	0.02237	A	1.04184	-0.20344	A	1.18087	-0.02272	A	1.23543	0.04244	A	1.04184	-0.20344	A	1.20662	1.15271	1.04677	0.0659416	0.670963	AA	0	miRNA	miRBase	Drosophila melanogaster	dme-miR-279-3p	3R:25041373-25041394 (+)	22	UGACUAGAUCCACACUCAUUAA	MIMAT0000341_st	MIMAT0000341	FBtr0085391 // sense // exon // 1 /// FBtr0303426 // sense // intron // 2 /// FBtr0303427 // sense // exon // 2	dme-mir-279 // 3R:25041307-25041406 (+) /// dme-mir-996 // 3R:25042906-25043002 (+)
20500589	0.91989	-0.39776	A	1.21192	0	A	1.21192	0	A	1.40058	0.20873	A	1.46404	0.27266	A	1.01195	-0.26016	A	1.11458	1.29219	0.862549	-0.213322	0.389551	AA	0	miRNA	miRBase	Drosophila melanogaster	dme-miR-33-5p	3L:19791086-19791106 (+)	21	GUGCAUUGUAGUCGCAUUGUC	MIMAT0000342_st	MIMAT0000342	FBtr0074873 // sense // intron // 6 /// FBtr0074874 // sense // intron // 6 /// FBtr0074875 // sense // intron // 5 /// FBtr0333877 // sense // intron // 6	---
20500590	1.07747	0	A	1.19228	0.14607	A	1.00307	-0.10324	A	1.26003	0.2258	A	0.93272	-0.20814	A	1.07747	0	A	1.09094	1.09007	1.0008	0.00114656	0.956555	AA	0	miRNA	miRBase	Drosophila melanogaster	dme-miR-33-3p	3L:19791125-19791146 (+)	22	CAAUACAACUUCAGUGCAAGCU	MIMAT0020808_st	MIMAT0020808	FBtr0074873 // sense // intron // 6 /// FBtr0074874 // sense // intron // 6 /// FBtr0074875 // sense // intron // 5 /// FBtr0333877 // sense // intron // 6	---
20500591	1.35967	0.1464	A	1.22847	0	A	1.59403	0.37582	P	1.22847	0	A	1.16769	-0.0732	A	1.22847	0	A	1.39406	1.20821	1.15382	0.206418	0.151228	PA	0	miRNA	miRBase	Drosophila melanogaster	dme-miR-280-5p	2R:4185620-4185646 (+)	27	UGUAUUUACGUUGCAUAUGAAAUGAUA	MIMAT0000343_st	MIMAT0000343	---	---
20500592	1.1642	-0.06512	A	1.32816	0.12497	A	1.43959	0.2412	A	1.18524	-0.03928	A	1.03533	-0.23437	A	1.25067	0.03824	A	1.31065	1.15708	1.13272	0.179794	0.212328	AA	0	miRNA	miRBase	Drosophila melanogaster	dme-miR-281-1-5p	2R:8057932-8057953 (-)	23	AAAGAGAGCUGUCCGUCGACAGU	MIMAT0000344_st	MIMAT0000344	FBtr0088013 // sense // intron // 1 /// FBtr0088014 // sense // intron // 1	dme-mir-281-1 // 2R:8057878-8057967 (-) /// dme-mir-281-2 // 2R:8057658-8057749 (-)
20500593	1.05048	-0.03147	A	0.98678	-0.12172	A	1.09682	0.0308	A	1.09682	0.0308	A	1.03548	-0.05223	A	1.61545	0.58941	P	1.04469	1.24925	0.836256	-0.257983	0.327094	PA	0	miRNA	miRBase	Drosophila melanogaster	dme-miR-281-3p	2R:8057668-8057690 (-) /// 2R:8057888-8057910 (-)	23	UGUCAUGGAAUUGCUCUCUUUGU	MIMAT0000345_st	MIMAT0000345	FBtr0088013 // sense // intron // 1 /// FBtr0088014 // sense // intron // 1 /// FBtr0088013 // sense // intron // 1 /// FBtr0088014 // sense // intron // 1	dme-mir-281-1 // 2R:8057878-8057967 (-) /// dme-mir-281-2 // 2R:8057658-8057749 (-) /// dme-mir-281-1 // 2R:8057878-8057967 (-) /// dme-mir-281-2 // 2R:8057658-8057749 (-)
20500594	1.2552	0.06213	A	1.0429	-0.20519	A	1.21959	0.02061	A	1.185	-0.02091	A	1.13952	-0.07736	A	1.58447	0.39821	A	1.17256	1.303	0.899897	-0.152168	0.457671	AA	0	miRNA	miRBase	Drosophila melanogaster	dme-miR-282-5p	3L:3251038-3251061 (+)	24	UAGCCUCUACUAGGCUUUGUCUGU	MIMAT0000346_st	MIMAT0000346	FBtr0309982 // sense // exon // 1	---
20500595	1.22847	-0.09143	A	1.48402	0.18123	A	1.2828	-0.02899	A	1.33487	0.02842	A	1.17233	-0.15891	A	1.39392	0.09086	A	1.33176	1.30037	1.02414	0.0344118	0.778929	AA	0	miRNA	miRBase	Drosophila melanogaster	dme-miR-282-3p	3L:3251081-3251102 (+)	22	ACAUAGCCUAUAAGAGGUUAGG	MIMAT0020809_st	MIMAT0020809	FBtr0309982 // sense // exon // 1	---
20500596	1.22847	0.08834	A	1.4366	0.31414	A	1.06698	-0.11499	A	1.08254	-0.0941	A	1.05048	-0.13747	A	1.22847	0.08834	A	1.24402	1.1205	1.11024	0.150867	0.368984	AA	0	miRNA	miRBase	Drosophila melanogaster	dme-miR-283-5p	X:15402009-15402030 (+)	22	AAAUAUCAGCUGGUAAUUCUGG	MIMAT0000347_st	MIMAT0000347	FBtr0074042 // sense // intron // 5 /// FBtr0074043 // sense // intron // 4	dme-mir-12 // X:15403506-15403579 (+) /// dme-mir-283 // X:15401989-15402088 (+) /// dme-mir-304 // X:15402992-15403079 (+)
20500597	1.3075	0.1464	A	1.05458	-0.16373	A	1.18133	0	A	1.18133	0	A	1.05048	-0.16935	A	1.18133	0	A	1.18114	1.13771	1.03817	0.0540388	0.657205	AA	0	miRNA	miRBase	Drosophila melanogaster	dme-miR-283-3p	X:15402056-15402076 (+)	21	CGGAAUUUCAGUUGGUAUCGA	MIMAT0020810_st	MIMAT0020810	FBtr0074042 // sense // intron // 5 /// FBtr0074043 // sense // intron // 4	dme-mir-12 // X:15403506-15403579 (+) /// dme-mir-283 // X:15401989-15402088 (+) /// dme-mir-304 // X:15402992-15403079 (+)
20500598	1.22847	0	A	1.22847	0	A	1.18133	-0.05645	A	1.22847	0	A	1.22847	0	A	1.80583	0.5558	P	1.21276	1.42092	0.853499	-0.228539	0.334664	PA	0	miRNA	miRBase	Drosophila melanogaster	dme-miR-284-5p	3R:8377302-8377327 (-)	26	CCUGGAAUUAAGUUGACUGUGUAGCC	MIMAT0020811_st	MIMAT0020811	---	---
20500599	1.05048	-0.09037	A	1.32929	0.24923	A	1.11839	0	A	1.11839	0	A	0.87492	-0.3542	A	1.17743	0.07421	A	1.16605	1.05691	1.10326	0.141777	0.429713	AA	0	miRNA	miRBase	Drosophila melanogaster	dme-miR-284-3p	3R:8377245-8377273 (-)	21	GUCAGCAACUUGAUUCCAGCA	MIMAT0000348_st	MIMAT0000348	---	---
20500600	1.3362	0.13946	A	1.19769	-0.01842	A	1.02417	-0.24422	A	1.22847	0.01818	A	1.3362	0.13946	A	1.15949	-0.06518	A	1.18602	1.24139	0.955399	-0.0658242	0.599415	AA	0	miRNA	miRBase	Drosophila melanogaster	dme-miR-281-2-5p	2R:8057714-8057735 (-)	22	AAGAGAGCUAUCCGUCGACAGU	MIMAT0000349_st	MIMAT0000349	FBtr0088013 // sense // intron // 1 /// FBtr0088014 // sense // intron // 1	dme-mir-281-1 // 2R:8057878-8057967 (-) /// dme-mir-281-2 // 2R:8057658-8057749 (-)
20500601	1.36116	-0.17225	A	1.37019	-0.16271	A	1.81996	0.24683	P	1.60504	0.06553	A	1.94527	0.34288	A	1.4625	-0.06865	A	1.5171	1.67094	0.907936	-0.139338	0.48094	PA	0	miRNA	miRBase	Drosophila melanogaster	dme-miR-34-5p	3R:5926674-5926697 (+)	24	UGGCAGUGUGGUUAGCUGGUUGUG	MIMAT0000350_st	MIMAT0000350	---	dme-mir-277 // 3R:5925744-5925843 (+) /// dme-mir-34 // 3R:5926658-5926756 (+) /// dme-mir-317 // 3R:5916848-5916939 (+)
20500602	1.49159	0.1889	A	1.3886	0.08568	A	1.22847	-0.09109	A	1.22847	-0.09109	A	1.22847	-0.09109	A	1.46066	0.15867	A	1.36955	1.30587	1.04877	0.0686978	0.58608	AA	0	miRNA	miRBase	Drosophila melanogaster	dme-miR-34-3p	3R:5926725-5926747 (+)	23	CAGCCACUAUCUUCACUGCCGCC	MIMAT0020812_st	MIMAT0020812	---	dme-mir-277 // 3R:5925744-5925843 (+) /// dme-mir-34 // 3R:5926658-5926756 (+) /// dme-mir-317 // 3R:5916848-5916939 (+)
20500603	1.15664	0.02598	A	1.12919	-0.00866	A	1.06923	-0.08738	A	1.28518	0.17801	A	1.136	0	A	1.136	0	A	1.11835	1.18573	0.94318	-0.0843954	0.291799	AA	0	miRNA	miRBase	Drosophila melanogaster	dme-miR-124-5p	2L:17566392-17566414 (+)	23	GGUAUCCACUGUAGGCCUAUAUG	MIMAT0020813_st	MIMAT0020813	---	dme-mir-124 // 2L:17566370-17566469 (+) /// dme-mir-287 // 2L:17574610-17574702 (+)
20500604	1.11207	-0.09218	A	1.24415	0.06973	A	1.09404	-0.11577	A	1.30082	0.134	A	1.22847	0.05143	A	1.14243	-0.05333	A	1.15009	1.22391	0.939685	-0.089751	0.320926	AA	0	miRNA	miRBase	Drosophila melanogaster	dme-miR-124-3p	2L:17566426-17566448 (+)	23	UAAGGCACGCGGUGAAUGCCAAG	MIMAT0000351_st	MIMAT0000351	---	dme-mir-124 // 2L:17566370-17566469 (+) /// dme-mir-287 // 2L:17574610-17574702 (+)
20500605	0.97901	-0.01875	A	1.38725	0.48409	A	0.97901	-0.01875	A	0.97901	-0.01875	A	1.00462	0.01851	A	1.06231	0.09907	A	1.11509	1.01531	1.09827	0.135235	0.535427	AA	0	miRNA	miRBase	Drosophila melanogaster	dme-miR-79-5p	2L:16698572-16698594 (+)	23	GCUUUGGCGCUUUAGCUGUAUGA	MIMAT0020814_st	MIMAT0020814	FBtr0080884 // sense // intron // 6 /// FBtr0080885 // sense // intron // 7 /// FBtr0080886 // sense // intron // 6 /// FBtr0100459 // sense // intron // 4	dme-mir-79 // 2L:16698554-16698650 (+) /// dme-mir-9c // 2L:16697924-16698015 (+) /// dme-mir-306 // 2L:16698404-16698488 (+) /// dme-mir-9b // 2L:16698744-16698834 (+)
20500606	1.14645	-0.18876	A	1.38495	0.0839	A	1.46066	0.16069	A	1.22847	-0.08908	A	0.98035	-0.41456	A	1.48626	0.18575	A	1.33069	1.23169	1.08037	0.111528	0.573232	AA	0	miRNA	miRBase	Drosophila melanogaster	dme-miR-79-3p	2L:16698613-16698634 (+)	22	UAAAGCUAGAUUACCAAAGCAU	MIMAT0000352_st	MIMAT0000352	FBtr0080884 // sense // intron // 6 /// FBtr0080885 // sense // intron // 7 /// FBtr0080886 // sense // intron // 6 /// FBtr0100459 // sense // intron // 4	dme-mir-79 // 2L:16698554-16698650 (+) /// dme-mir-9c // 2L:16697924-16698015 (+) /// dme-mir-306 // 2L:16698404-16698488 (+) /// dme-mir-9b // 2L:16698744-16698834 (+)
20500607	1.05048	-0.16364	A	0.98568	-0.2555	A	1.18133	0.00571	A	1.19961	0.02787	A	1.19074	0.01716	A	1.17199	-0.00573	A	1.0725	1.18745	0.903196	-0.14689	0.122085	AA	0	miRNA	miRBase	Drosophila melanogaster	dme-miR-276b-5p	3L:10312907-10312929 (+)	23	CAGCGAGGUAUAGAGUUCCUACG	MIMAT0020815_st	MIMAT0020815	---	---
20500608	1.29548	0.0709	A	1.23825	0.00571	A	1.3232	0.10144	A	1.22847	-0.00573	A	1.02308	-0.26967	A	1.1315	-0.12436	A	1.28564	1.12768	1.14007	0.189128	0.0770843	AA	0	miRNA	miRBase	Drosophila melanogaster	dme-miR-276b-3p	3L:10312946-10312967 (+)	22	UAGGAACUUAAUACCGUGCUCU	MIMAT0000354_st	MIMAT0000354	---	---
20500609	1.08816	0	A	0.97901	-0.15249	A	1.05048	-0.05083	A	1.08816	0	A	1.08816	0	A	1.08816	0	A	1.03922	1.08816	0.955022	-0.0663942	0.205107	AA	0	miRNA	miRBase	Drosophila melanogaster	dme-miR-210-5p	X:18022267-18022289 (+)	23	AGCUGCUGGCCACUGCACAAGAU	MIMAT0020816_st	MIMAT0020816	---	dme-mir-210 // X:18022252-18022351 (+) /// dme-mir-969 // X:18018390-18018483 (+)
20500610	1.40187	-0.11085	A	1.6935	0.16181	A	1.86657	0.30219	P	1.62578	0.10293	A	1.31597	-0.20207	A	1.15176	-0.39436	A	1.65398	1.3645	1.21215	0.277566	0.209381	PA	0	miRNA	miRBase	Drosophila melanogaster	dme-miR-210-3p	X:18022304-18022324 (+)	23	CUUGUGCGUGUGACAGCGGCUAU	MIMAT0000355_st	MIMAT0000355	---	dme-mir-210 // X:18022252-18022351 (+) /// dme-mir-969 // X:18018390-18018483 (+)
20500611	1.17643	-0.18732	A	1.33954	0	A	1.33954	0	A	1.33954	0	A	1.33954	0	A	1.33954	0	A	1.28517	1.33954	0.959411	-0.0597785	0.373901	AA	0	miRNA	miRBase	Drosophila melanogaster	dme-miR-285-5p	3L:11939257-11939279 (-)	23	ACUGAGAUCGAUUGGUGCAUAGA	MIMAT0020817_st	MIMAT0020817	---	---
20500612	1.35967	-0.10669	A	1.27283	-0.20192	A	1.46261	-0.00141	A	2.13437	0.54386	P	1.46547	0.00141	A	1.73907	0.24836	A	1.36504	1.77964	0.767031	-0.382643	0.0925622	PA	0	miRNA	miRBase	Drosophila melanogaster	dme-miR-285-3p	3L:11939207-11939228 (-)	22	UAGCACCAUUCGAAAUCAGUGC	MIMAT0000356_st	MIMAT0000356	---	---
20500613	1.30947	0.02717	A	1.41439	0.13838	A	1.22847	-0.06495	A	1.41439	0.13838	P	1.2606	-0.0277	P	1.22847	-0.06495	A	1.31744	1.30115	1.01252	0.0179499	0.841613	PA	0	miRNA	miRBase	Drosophila melanogaster	dme-miR-100-5p	2L:18471445-18471466 (+)	22	AACCCGUAAAUCCGAACUUGUG	MIMAT0000357_st	MIMAT0000357	FBtr0306973 // sense // exon // 2	dme-mir-100 // 2L:18471434-18471533 (+) /// dme-let-7 // 2L:18472034-18472111 (+) /// dme-mir-125 // 2L:18472315-18472424 (+)
20500614	1.38425	0	A	1.38425	0	A	1.46066	0.07752	A	1.38425	0	A	1.38425	0	A	1.46066	0.07752	A	1.40972	1.40972	1	0	1	AA	0	miRNA	miRBase	Drosophila melanogaster	dme-miR-100-3p	2L:18471484-18471505 (+)	22	CAAGACCGGCAUUAUGGGAGUC	MIMAT0020818_st	MIMAT0020818	FBtr0306973 // sense // exon // 2	dme-mir-100 // 2L:18471434-18471533 (+) /// dme-let-7 // 2L:18472034-18472111 (+) /// dme-mir-125 // 2L:18472315-18472424 (+)
20500615	0.99921	-0.00127	A	0.99665	-0.00498	A	1.34536	0.42786	A	1.00097	0.00127	A	1.14547	0.19581	A	0.99489	-0.00752	A	1.11374	1.04711	1.06363	0.0889995	0.650581	AA	0	miRNA	miRBase	Drosophila melanogaster	dme-miR-92b-5p	3R:21477138-21477160 (+)	23	AGGCCGUGCCCAGUGCUUAUUUG	MIMAT0020819_st	MIMAT0020819	---	dme-mir-92a // 3R:21472228-21472322 (+) /// dme-mir-92b // 3R:21477120-21477219 (+)
20500616	24.1278	2.78152	P	3.40182	-0.04481	P	3.61644	0.04346	P	1.48079	-1.24475	A	47.0371	3.74462	P	1.17931	-1.57317	A	10.382	16.5657	0.626718	-0.674113	0.767752	PA	0	miRNA	miRBase	Drosophila melanogaster	dme-miR-92b-3p	3R:21477179-21477200 (+)	22	AAUUGCACUAGUCCCGGCCUGC	MIMAT0000358_st	MIMAT0000358	---	dme-mir-92a // 3R:21472228-21472322 (+) /// dme-mir-92b // 3R:21477120-21477219 (+)
20500617	1.15029	-0.00475	A	1.2771	0.14612	A	1.15029	-0.00475	A	1.45623	0.33549	A	1.15029	-0.00475	A	1.15789	0.00474	A	1.19256	1.2548	0.950396	-0.0733994	0.617576	AA	0	miRNA	miRBase	Drosophila melanogaster	dme-miR-286-5p	2R:15548993-15549014 (-)	22	GGCGAAUGUCGGUAUGGUCUCU	MIMAT0020820_st	MIMAT0020820	---	dme-mir-3 // 2R:15549100-15549168 (-) /// dme-mir-4 // 2R:15548794-15548874 (-) /// dme-mir-5 // 2R:15548663-15548731 (-) /// dme-mir-6-1 // 2R:15548508-15548589 (-) /// dme-mir-6-2 // 2R:15548374-15548447 (-) /// dme-mir-6-3 // 2R:15548221-15548300 (-) /// dme-mir-286 // 2R:15548927-15549026 (-) /// dme-mir-309 // 2R:15549211-15549279 (-)
20500618	1.0924	-0.08716	A	1.26318	0.1224	A	1.22847	0.08219	A	1.0668	-0.12138	A	1.06459	-0.12437	A	1.26581	0.12539	A	1.19468	1.1324	1.055	0.0772446	0.491359	AA	0	miRNA	miRBase	Drosophila melanogaster	dme-miR-286-3p	2R:15548940-15548962 (-)	23	UGACUAGACCGAACACUCGUGCU	MIMAT0000359_st	MIMAT0000359	---	dme-mir-3 // 2R:15549100-15549168 (-) /// dme-mir-4 // 2R:15548794-15548874 (-) /// dme-mir-5 // 2R:15548663-15548731 (-) /// dme-mir-6-1 // 2R:15548508-15548589 (-) /// dme-mir-6-2 // 2R:15548374-15548447 (-) /// dme-mir-6-3 // 2R:15548221-15548300 (-) /// dme-mir-286 // 2R:15548927-15549026 (-) /// dme-mir-309 // 2R:15549211-15549279 (-)
20500619	1.52009	0.44719	A	1.15864	0.05547	A	1.05048	-0.08591	A	1.46066	0.38966	A	0.93626	-0.25198	A	1.07124	-0.05769	A	1.24307	1.15605	1.07527	0.1047	0.67429	AA	0	miRNA	miRBase	Drosophila melanogaster	dme-miR-287-3p	2L:17574674-17574694 (+)	21	UGUGUUGAAAAUCGUUUGCAC	MIMAT0000360_st	MIMAT0000360	---	dme-mir-124 // 2L:17566370-17566469 (+) /// dme-mir-287 // 2L:17574610-17574702 (+)
20500620	1.136	-0.05645	A	1.22847	0.05645	A	1.18133	0	A	1.18133	0	A	0.93626	-0.33542	A	1.22847	0.05645	A	1.18193	1.11535	1.05969	0.0836478	0.503285	AA	0	miRNA	miRBase	Drosophila melanogaster	dme-miR-87-5p	2L:9950483-9950504 (-)	22	UCGCGCCUGUAUCUUGCUGAAC	MIMAT0020821_st	MIMAT0020821	---	---
20500621	1.22355	0.1464	A	1.10548	0	A	0.91239	-0.27695	A	1.10548	0	A	1.10548	0	A	1.10548	0	A	1.08047	1.10548	0.977379	-0.0330095	0.743608	AA	0	miRNA	miRBase	Drosophila melanogaster	dme-miR-87-3p	2L:9950436-9950456 (-)	21	UUGAGCAAAAUUUCAGGUGUG	MIMAT0000361_st	MIMAT0000361	---	---
20500622	1.29241	0.10849	A	1.31114	0.12925	A	1.00872	-0.24905	A	0.97379	-0.29988	A	1.10516	-0.11732	A	1.34876	0.17007	A	1.20409	1.14257	1.05384	0.0756607	0.690929	AA	0	miRNA	miRBase	Drosophila melanogaster	dme-miR-263b-5p	3L:15836560-15836580 (-)	21	CUUGGCACUGGGAGAAUUCAC	MIMAT0000362_st	MIMAT0000362	FBtr0075535 // sense // intron // 1 /// FBtr0306852 // sense // intron // 1 /// FBtr0306853 // sense // intron // 1	---
20500623	1.42833	0.22363	A	1.18737	-0.04292	A	1.70086	0.47557	A	1.22022	-0.00355	A	1.22323	0	A	1.22323	0	A	1.43885	1.22223	1.17724	0.235408	0.215703	AA	0	miRNA	miRBase	Drosophila melanogaster	dme-miR-263b-3p	3L:15836520-15836541 (-)	22	GUGGUUCUGCGGGUGCCAAAAC	MIMAT0020822_st	MIMAT0020822	FBtr0075535 // sense // intron // 1 /// FBtr0306852 // sense // intron // 1 /// FBtr0306853 // sense // intron // 1	---
20500624	0.97057	-0.15088	A	1.07757	0	A	1.07757	0	A	1.24066	0.20333	A	1.0587	-0.02549	A	1.19057	0.14386	A	1.0419	1.16331	0.895637	-0.159014	0.137538	AA	0	miRNA	miRBase	Drosophila melanogaster	dme-miR-288-3p	2L:20618375-20618397 (-)	23	UUUCAUGUCGAUUUCAUUUCAUG	MIMAT0000363_st	MIMAT0000363	---	dme-mir-133 // 2L:20616617-20616714 (+) /// dme-mir-288 // 2L:20618366-20618462 (-)
20500625	723.24	5.61888	P	2.21837	-2.72995	P	105.856	2.84651	P	6.97105	-1.07808	P	22.4638	0.61008	P	1.88601	-2.96412	P	277.105	10.4403	26.5419	4.7302	0.315165	PP	0	miRNA	miRBase	Drosophila melanogaster	dme-miR-289-5p	3L:13613937-13613962 (+)	26	UAAAUAUUUAAGUGGAGCCUGCGACU	MIMAT0000364_st	MIMAT0000364	FBtr0330343 // antisense // intron // 4 /// FBtr0330344 // antisense // intron // 3 /// FBtr0330345 // antisense // intron // 3 /// FBtr0330346 // antisense // intron // 3 /// FBtr0330347 // antisense // intron // 3 /// FBtr0330348 // antisense // intron // 3 /// FBtr0330349 // antisense // intron // 4 /// FBtr0330350 // antisense // intron // 3 /// FBtr0330351 // antisense // intron // 3 /// FBt…	---
20500626	1.30636	0.25679	A	0.97024	-0.17234	A	1.09336	0	A	1.09336	0	A	0.95342	-0.19758	A	1.09336	0	A	1.12332	1.04671	1.07319	0.101903	0.541448	AA	0	miRNA	miRBase	Drosophila melanogaster	dme-bantam-5p	3L:642222-642244 (+)	23	CCGGUUUUCGAUUUGGUUUGACU	MIMAT0020823_st	MIMAT0020823	FBtr0306918 // sense // exon // 1 /// FBtr0333724 // sense // exon // 1 /// FBtr0333725 // sense // exon // 1	---
20500627	1.20467	0	A	1.05048	-0.19758	A	1.20467	0	A	1.20467	0	A	1.20467	0	A	1.04631	-0.20333	A	1.15327	1.15188	1.00121	0.00173988	0.984796	AA	0	miRNA	miRBase	Drosophila melanogaster	dme-bantam-3p	3L:642259-642281 (+)	23	UGAGAUCAUUUUGAAAGCUGAUU	MIMAT0000365_st	MIMAT0000365	FBtr0306918 // sense // exon // 1 /// FBtr0333724 // sense // exon // 1 /// FBtr0333725 // sense // exon // 1	---
20500628	1.48335	0.18646	A	1.10893	-0.23323	A	1.34021	0.04006	A	1.26681	-0.0412	A	1.38776	0.09036	A	1.26681	-0.0412	A	1.31083	1.30713	1.00283	0.00408164	0.971939	AA	0	miRNA	miRBase	Mus musculus	mmu-miR-290a-5p	chr7:3218639-3218660 (+)	22	ACUCAAACUAUGGGGGCACUUU	MIMAT0000366_st	MIMAT0000366	---	mmu-mir-290a // chr7:3218626-3218708 (+) /// mmu-mir-291a // chr7:3218919-3219000 (+) /// mmu-mir-292 // chr7:3219189-3219270 (+) /// mmu-mir-293 // chr7:3220343-3220422 (+) /// mmu-mir-294 // chr7:3220641-3220724 (+) /// mmu-mir-295 // chr7:3220773-3220841 (+) /// mmu-mir-291b // chr7:3219482-3219560 (+) /// mmu-mir-292b // chr7:3219198-3219259 (-) /// mmu-mir-290b // chr7:3218638-3218695 (-)
20500629	1.22847	0.09109	A	1.22847	0.09109	A	1.21419	0.07423	A	1.0924	-0.07826	A	1.0924	-0.07826	A	1.0924	-0.07826	A	1.22371	1.0924	1.1202	0.16376	8.26119e-06	AA	0	miRNA	miRBase	Mus musculus	mmu-miR-290a-3p	chr7:3218674-3218697 (+)	24	AAAGUGCCGCCUAGUUUUAAGCCC	MIMAT0004572_st	MIMAT0004572	---	mmu-mir-290a // chr7:3218626-3218708 (+) /// mmu-mir-291a // chr7:3218919-3219000 (+) /// mmu-mir-292 // chr7:3219189-3219270 (+) /// mmu-mir-293 // chr7:3220343-3220422 (+) /// mmu-mir-294 // chr7:3220641-3220724 (+) /// mmu-mir-295 // chr7:3220773-3220841 (+) /// mmu-mir-291b // chr7:3219482-3219560 (+) /// mmu-mir-292b // chr7:3219198-3219259 (-) /// mmu-mir-290b // chr7:3218638-3218695 (-)
20500630	2.05785	0.55696	A	1.22847	-0.18732	A	1.47388	0.07544	A	1.39879	0	A	1.17985	-0.24557	A	1.39879	0	A	1.58673	1.32581	1.1968	0.259186	0.378683	AA	0	miRNA	miRBase	Mus musculus	mmu-miR-291a-5p	chr7:3218932-3218953 (+)	22	CAUCAAAGUGGAGGCCCUCUCU	MIMAT0000367_st	MIMAT0000367	---	mmu-mir-290a // chr7:3218626-3218708 (+) /// mmu-mir-291a // chr7:3218919-3219000 (+) /// mmu-mir-292 // chr7:3219189-3219270 (+) /// mmu-mir-293 // chr7:3220343-3220422 (+) /// mmu-mir-294 // chr7:3220641-3220724 (+) /// mmu-mir-295 // chr7:3220773-3220841 (+) /// mmu-mir-291b // chr7:3219482-3219560 (+) /// mmu-mir-292b // chr7:3219198-3219259 (-) /// mmu-mir-290b // chr7:3218638-3218695 (-)
20500631	1.19559	0.00863	A	1.16723	-0.02601	A	1.17426	-0.01735	A	1.18133	-0.00869	A	1.33646	0.16933	A	1.36943	0.20448	A	1.17903	1.29574	0.909925	-0.13618	0.116743	AA	0	miRNA	miRBase	Mus musculus	mmu-miR-291a-3p	chr7:3218968-3218989 (+)	22	AAAGUGCUUCCACUUUGUGUGC	MIMAT0000368_st	MIMAT0000368	---	mmu-mir-290a // chr7:3218626-3218708 (+) /// mmu-mir-291a // chr7:3218919-3219000 (+) /// mmu-mir-292 // chr7:3219189-3219270 (+) /// mmu-mir-293 // chr7:3220343-3220422 (+) /// mmu-mir-294 // chr7:3220641-3220724 (+) /// mmu-mir-295 // chr7:3220773-3220841 (+) /// mmu-mir-291b // chr7:3219482-3219560 (+) /// mmu-mir-292b // chr7:3219198-3219259 (-) /// mmu-mir-290b // chr7:3218638-3218695 (-)
20500632	1.39172	0.37221	A	1.22847	0.1922	A	0.94312	-0.18915	A	0.92125	-0.22299	A	1.07524	0	A	1.07524	0	A	1.18777	1.02391	1.16003	0.214167	0.333381	AA	0	miRNA	miRBase	Mus musculus	mmu-miR-292-5p	chr7:3219200-3219221 (+)	22	ACUCAAACUGGGGGCUCUUUUG	MIMAT0000369_st	MIMAT0000369	---	mmu-mir-290a // chr7:3218626-3218708 (+) /// mmu-mir-291a // chr7:3218919-3219000 (+) /// mmu-mir-292 // chr7:3219189-3219270 (+) /// mmu-mir-293 // chr7:3220343-3220422 (+) /// mmu-mir-294 // chr7:3220641-3220724 (+) /// mmu-mir-295 // chr7:3220773-3220841 (+) /// mmu-mir-291b // chr7:3219482-3219560 (+) /// mmu-mir-292b // chr7:3219198-3219259 (-) /// mmu-mir-290b // chr7:3218638-3218695 (-)
20500633	1.35889	-0.06731	A	1.43653	0.01284	A	1.43368	0.00998	A	1.82964	0.36182	A	1.29985	-0.1314	A	1.41391	-0.01005	A	1.4097	1.51447	0.930823	-0.103422	0.589406	AA	0	miRNA	miRBase	Mus musculus	mmu-miR-292-3p	chr7:3219238-3219261 (+)	24	AAAGUGCCGCCAGGUUUUGAGUGU	MIMAT0000370_st	MIMAT0000370	---	mmu-mir-290a // chr7:3218626-3218708 (+) /// mmu-mir-291a // chr7:3218919-3219000 (+) /// mmu-mir-292 // chr7:3219189-3219270 (+) /// mmu-mir-293 // chr7:3220343-3220422 (+) /// mmu-mir-294 // chr7:3220641-3220724 (+) /// mmu-mir-295 // chr7:3220773-3220841 (+) /// mmu-mir-291b // chr7:3219482-3219560 (+) /// mmu-mir-292b // chr7:3219198-3219259 (-) /// mmu-mir-290b // chr7:3218638-3218695 (-)
20500634	1.1642	-0.07752	A	1.05048	-0.2258	A	1.22847	0	A	1.22847	0	A	1.22847	0	A	1.22847	0	A	1.14772	1.22847	0.934265	-0.0980961	0.201627	AA	0	miRNA	miRBase	Mus musculus	mmu-miR-293-5p	chr7:3220356-3220377 (+)	22	ACUCAAACUGUGUGACAUUUUG	MIMAT0004573_st	MIMAT0004573	---	mmu-mir-290a // chr7:3218626-3218708 (+) /// mmu-mir-291a // chr7:3218919-3219000 (+) /// mmu-mir-292 // chr7:3219189-3219270 (+) /// mmu-mir-293 // chr7:3220343-3220422 (+) /// mmu-mir-294 // chr7:3220641-3220724 (+) /// mmu-mir-295 // chr7:3220773-3220841 (+) /// mmu-mir-291b // chr7:3219482-3219560 (+) /// mmu-mir-292b // chr7:3219198-3219259 (-) /// mmu-mir-290b // chr7:3218638-3218695 (-)
20500635	1.07272	-0.05173	A	1.07272	-0.05173	A	0.96621	-0.2026	A	1.15104	0.04994	A	1.17311	0.07733	A	1.39056	0.32265	A	1.03722	1.23824	0.837656	-0.25557	0.0657709	AA	0	miRNA	miRBase	Mus musculus	mmu-miR-293-3p	chr7:3220390-3220411 (+)	22	AGUGCCGCAGAGUUUGUAGUGU	MIMAT0000371_st	MIMAT0000371	---	mmu-mir-290a // chr7:3218626-3218708 (+) /// mmu-mir-291a // chr7:3218919-3219000 (+) /// mmu-mir-292 // chr7:3219189-3219270 (+) /// mmu-mir-293 // chr7:3220343-3220422 (+) /// mmu-mir-294 // chr7:3220641-3220724 (+) /// mmu-mir-295 // chr7:3220773-3220841 (+) /// mmu-mir-291b // chr7:3219482-3219560 (+) /// mmu-mir-292b // chr7:3219198-3219259 (-) /// mmu-mir-290b // chr7:3218638-3218695 (-)
20500636	1.22847	-0.08924	A	1.43742	0.13739	A	1.04091	-0.32825	A	1.38523	0.08404	A	1.18989	-0.13527	A	1.60284	0.29454	A	1.2356	1.39265	0.887227	-0.172624	0.394261	AA	0	miRNA	miRBase	Mus musculus	mmu-miR-294-5p	chr7:3220655-3220676 (+)	22	ACUCAAAAUGGAGGCCCUAUCU	MIMAT0004574_st	MIMAT0004574	---	mmu-mir-290a // chr7:3218626-3218708 (+) /// mmu-mir-291a // chr7:3218919-3219000 (+) /// mmu-mir-292 // chr7:3219189-3219270 (+) /// mmu-mir-293 // chr7:3220343-3220422 (+) /// mmu-mir-294 // chr7:3220641-3220724 (+) /// mmu-mir-295 // chr7:3220773-3220841 (+) /// mmu-mir-291b // chr7:3219482-3219560 (+) /// mmu-mir-292b // chr7:3219198-3219259 (-) /// mmu-mir-290b // chr7:3218638-3218695 (-)
20500637	1.05458	-0.19206	A	1.20475	0	A	1.05048	-0.19768	A	1.25274	0.05635	A	1.20475	0	A	1.25274	0.05635	A	1.10327	1.23674	0.892077	-0.16476	0.0684951	AA	0	miRNA	miRBase	Mus musculus	mmu-miR-294-3p	chr7:3220691-3220712 (+)	22	AAAGUGCUUCCCUUUUGUGUGU	MIMAT0000372_st	MIMAT0000372	---	mmu-mir-290a // chr7:3218626-3218708 (+) /// mmu-mir-291a // chr7:3218919-3219000 (+) /// mmu-mir-292 // chr7:3219189-3219270 (+) /// mmu-mir-293 // chr7:3220343-3220422 (+) /// mmu-mir-294 // chr7:3220641-3220724 (+) /// mmu-mir-295 // chr7:3220773-3220841 (+) /// mmu-mir-291b // chr7:3219482-3219560 (+) /// mmu-mir-292b // chr7:3219198-3219259 (-) /// mmu-mir-290b // chr7:3218638-3218695 (-)
20500638	1.29943	0.01142	A	1.07595	-0.26084	A	1.0587	-0.28417	A	1.48409	0.20312	A	1.27894	-0.01151	A	1.83591	0.51004	A	1.14469	1.53298	0.746711	-0.421378	0.0824758	AA	0	miRNA	miRBase	Mus musculus	mmu-miR-295-5p	chr7:3220779-3220800 (+)	22	ACUCAAAUGUGGGGCACACUUC	MIMAT0004575_st	MIMAT0004575	---	mmu-mir-290a // chr7:3218626-3218708 (+) /// mmu-mir-291a // chr7:3218919-3219000 (+) /// mmu-mir-292 // chr7:3219189-3219270 (+) /// mmu-mir-293 // chr7:3220343-3220422 (+) /// mmu-mir-294 // chr7:3220641-3220724 (+) /// mmu-mir-295 // chr7:3220773-3220841 (+) /// mmu-mir-291b // chr7:3219482-3219560 (+) /// mmu-mir-292b // chr7:3219198-3219259 (-) /// mmu-mir-290b // chr7:3218638-3218695 (-)
20500639	1.35967	0.1464	A	1.22847	0	A	1.22847	0	A	1.22847	0	A	1.22847	0	A	1.22847	0	A	1.2722	1.22847	1.0356	0.0504666	0.373901	AA	0	miRNA	miRBase	Mus musculus	mmu-miR-295-3p	chr7:3220815-3220837 (+)	23	AAAGUGCUACUACUUUUGAGUCU	MIMAT0000373_st	MIMAT0000373	---	mmu-mir-290a // chr7:3218626-3218708 (+) /// mmu-mir-291a // chr7:3218919-3219000 (+) /// mmu-mir-292 // chr7:3219189-3219270 (+) /// mmu-mir-293 // chr7:3220343-3220422 (+) /// mmu-mir-294 // chr7:3220641-3220724 (+) /// mmu-mir-295 // chr7:3220773-3220841 (+) /// mmu-mir-291b // chr7:3219482-3219560 (+) /// mmu-mir-292b // chr7:3219198-3219259 (-) /// mmu-mir-290b // chr7:3218638-3218695 (-)
20500640	1.36314	-0.09069	A	1.4763	0.02436	A	1.46066	0.009	A	1.4425	-0.00906	A	1.22847	-0.24077	A	1.79702	0.30798	P	1.43337	1.48933	0.962424	-0.0552557	0.824988	PA	0	miRNA	miRBase	Mus musculus	mmu-miR-296-5p	chr2:174267093-174267113 (-)	21	AGGGCCCCCCCUCAAUCCUGU	MIMAT0000374_st	MIMAT0000374	---	mmu-mir-296 // chr2:174267047-174267125 (-) /// mmu-mir-298 // chr2:174267504-174267585 (-)
20500641	2.81214	0.39356	P	1.90865	-0.16555	P	2.54099	0.24728	P	1.45186	-0.5602	A	2.37282	0.1485	P	1.27534	-0.74723	A	2.42059	1.70001	1.42387	0.50982	0.16398	PA	0	miRNA	miRBase	Mus musculus	mmu-miR-296-3p	chr2:174267058-174267079 (-)	22	GAGGGUUGGGUGGAGGCUCUCC	MIMAT0004576_st	MIMAT0004576	---	mmu-mir-296 // chr2:174267047-174267125 (-) /// mmu-mir-298 // chr2:174267504-174267585 (-)
20500642	1.52743	-0.07374	P	1.9086	0.24766	P	2.25919	0.49095	P	1.44314	-0.15565	A	1.68764	0.07016	P	1.4784	-0.12081	A	1.89841	1.53639	1.23563	0.305241	0.178059	PA	0	miRNA	miRBase	Mus musculus	mmu-miR-297a-5p	chr2:10472264-10472285 (+) /// chr2:10515830-10515851 (+) /// chr2:10517077-10517098 (+) /// chr7:10958477-10958498 (-)	22	AUGUAUGUGUGCAUGUGCAUGU	MIMAT0000375_st	MIMAT0000375	ENSMUST00000041105 // sense // intron // 10 /// ENSMUST00000116594 // sense // intron // 11 /// OTTMUST00000026263 // sense // intron // 10 /// ENSMUST00000041105 // sense // intron // 10 /// ENSMUST00000116594 // sense // intron // 11 /// OTTMUST00000026263 // sense // intron // 10 /// ENSMUST00000041105 // sense // intron // 10 /// ENSMUST00000116594 // sense // intron // 11 /// OTTMUST00000026…	mmu-mir-297a-2 // chr2:10472254-10472343 (+) /// mmu-mir-467a-1 // chr2:10476346-10476418 (+) /// mmu-mir-669a-1 // chr2:10476853-10476949 (+) /// mmu-mir-669b // chr2:10467790-10467886 (+) /// mmu-mir-669a-3 // chr2:10474433-10474541 (+) /// mmu-mir-467b // chr2:10481248-10481320 (+) /// mmu-mir-466b-1 // chr2:10474219-10474300 (+) /// mmu-mir-466c-1 // chr2:10481534-10481617 (+) /// mmu-mir-466…
20500643	1.34837	0.12252	A	1.05048	-0.23764	A	1.29565	0.06499	A	1.2487	0.01174	A	1.22847	-0.01183	A	1.06779	-0.21407	A	1.2315	1.18165	1.04218	0.0596098	0.701455	AA	0	miRNA	miRBase	Mus musculus	mmu-miR-298-5p	chr2:174267553-174267575 (-)	23	GGCAGAGGAGGGCUGUUCUUCCC	MIMAT0000376_st	MIMAT0000376	---	mmu-mir-296 // chr2:174267047-174267125 (-) /// mmu-mir-298 // chr2:174267504-174267585 (-)
20500644	2.22182	0.84092	P	1.15443	-0.10364	A	1.20203	-0.04534	A	1.15443	-0.10364	A	1.27879	0.04396	A	1.55434	0.32549	A	1.52609	1.32919	1.14814	0.199299	0.689504	PA	0	miRNA	miRBase	Mus musculus	mmu-miR-298-3p	chr2:174267514-174267535 (-)	22	GAGGAACUAGCCUUCUCUCAGC	MIMAT0017007_st	MIMAT0017007	---	mmu-mir-296 // chr2:174267047-174267125 (-) /// mmu-mir-298 // chr2:174267504-174267585 (-)
20500645	1.38425	0	A	1.38425	0	A	1.38425	0	A	1.46066	0.07752	A	1.62161	0.22833	P	1.38425	0	A	1.38425	1.48884	0.929751	-0.105084	0.202939	PA	0	miRNA	miRBase	Mus musculus	mmu-miR-299a-5p	chr12:109710644-109710665 (+)	22	UGGUUUACCGUCCCACAUACAU	MIMAT0000377_st	MIMAT0000377	ENSMUST00000175550 // antisense // exon // 1	mmu-mir-299a // chr12:109710638-109710700 (+) /// mmu-mir-323 // chr12:109712508-109712593 (+) /// mmu-mir-329 // chr12:109713481-109713577 (+) /// mmu-mir-379 // chr12:109709060-109709125 (+) /// mmu-mir-380 // chr12:109711803-109711863 (+) /// mmu-mir-411 // chr12:109710175-109710256 (+) /// mmu-mir-543 // chr12:109717258-109717333 (+) /// mmu-mir-494 // chr12:109715318-109715402 (+) /// mmu-mi…
20500646	1.0924	-0.1129	A	1.28785	0.12455	A	1.18133	0	A	1.27749	0.1129	A	1.14781	-0.04152	A	1.18133	0	A	1.18719	1.20221	0.987509	-0.018134	0.821475	AA	0	miRNA	miRBase	Mus musculus	mmu-miR-299a-3p	chr12:109710676-109710697 (+)	22	UAUGUGGGACGGUAAACCGCUU	MIMAT0004577_st	MIMAT0004577	ENSMUST00000175550 // antisense // exon // 1	mmu-mir-299a // chr12:109710638-109710700 (+) /// mmu-mir-323 // chr12:109712508-109712593 (+) /// mmu-mir-329 // chr12:109713481-109713577 (+) /// mmu-mir-379 // chr12:109709060-109709125 (+) /// mmu-mir-380 // chr12:109711803-109711863 (+) /// mmu-mir-411 // chr12:109710175-109710256 (+) /// mmu-mir-543 // chr12:109717258-109717333 (+) /// mmu-mir-494 // chr12:109715318-109715402 (+) /// mmu-mi…
20500647	1.6805	0.4819	A	1.02896	-0.2258	A	1.26286	0.06971	A	1.2033	0	A	1.07246	-0.16607	A	1.2033	0	A	1.32411	1.15969	1.14178	0.191284	0.483527	AA	0	miRNA	miRBase	Mus musculus	mmu-miR-300-5p	chr12:109724318-109724339 (+)	22	UUGAAGAGAGGUUAUCCUUUGU	MIMAT0004578_st	MIMAT0004578	---	mmu-mir-134 // chr12:109734139-109734209 (+) /// mmu-mir-300 // chr12:109724313-109724391 (+) /// mmu-mir-376a // chr12:109723781-109723848 (+) /// mmu-mir-381 // chr12:109726822-109726896 (+) /// mmu-mir-382 // chr12:109733771-109733846 (+) /// mmu-mir-376b // chr12:109723458-109723539 (+) /// mmu-mir-543 // chr12:109717258-109717333 (+) /// mmu-mir-539 // chr12:109728129-109728202 (+) /// mmu-m…
20500648	1.39761	0.1861	A	1.15173	-0.09305	A	1.22847	0	A	1.22847	0	A	1.07979	-0.1861	A	1.22847	0	A	1.25927	1.17891	1.06816	0.0951341	0.416865	AA	0	miRNA	miRBase	Mus musculus	mmu-miR-300-3p	chr12:109724363-109724384 (+)	22	UAUGCAAGGGCAAGCUCUCUUC	MIMAT0000378_st	MIMAT0000378	---	mmu-mir-134 // chr12:109734139-109734209 (+) /// mmu-mir-300 // chr12:109724313-109724391 (+) /// mmu-mir-376a // chr12:109723781-109723848 (+) /// mmu-mir-381 // chr12:109726822-109726896 (+) /// mmu-mir-382 // chr12:109733771-109733846 (+) /// mmu-mir-376b // chr12:109723458-109723539 (+) /// mmu-mir-543 // chr12:109717258-109717333 (+) /// mmu-mir-539 // chr12:109728129-109728202 (+) /// mmu-m…
20500649	1.31106	0.02594	A	1.29792	0.0114	A	1.27749	-0.01149	A	1.18133	-0.12439	A	1.18133	-0.12439	A	1.38148	0.10141	A	1.29549	1.24805	1.03801	0.053826	0.490001	AA	0	miRNA	miRBase	Mus musculus	mmu-miR-301a-5p	chr11:87113017-87113038 (+)	22	GCUCUGACUUUAUUGCACUACU	MIMAT0017008_st	MIMAT0017008	ENSMUST00000020794 // sense // intron // 1 /// ENSMUST00000142263 // sense // intron // 1 /// OTTMUST00000002440 // sense // intron // 1 /// OTTMUST00000067491 // sense // intron // 1	---
20500650	1.37646	0.1641	A	1.22847	0	A	1.05048	-0.2258	A	1.44258	0.23179	A	0.96503	-0.34821	A	1.22847	0	A	1.21847	1.21203	1.00532	0.00764929	0.932707	AA	0	miRNA	miRBase	Mus musculus	mmu-miR-301a-3p	chr11:87113054-87113076 (+)	23	CAGUGCAAUAGUAUUGUCAAAGC	MIMAT0000379_st	MIMAT0000379	ENSMUST00000020794 // sense // intron // 1 /// ENSMUST00000142263 // sense // intron // 1 /// OTTMUST00000002440 // sense // intron // 1 /// OTTMUST00000067491 // sense // intron // 1	---
20500651	1.22847	0.01512	A	1.5702	0.3692	P	1.07371	-0.17914	A	1.16367	-0.06305	A	1.20286	-0.01528	A	1.78101	0.55095	P	1.29079	1.38251	0.933657	-0.0990354	0.743565	PA	0	miRNA	miRBase	Mus musculus	mmu-miR-302a-5p	chr3:127545501-127545522 (+)	22	ACUUAAACGUGGUUGUACUUGC	MIMAT0004579_st	MIMAT0004579	ENSMUST00000029588 // antisense // intron // 8	mmu-mir-302a // chr3:127545496-127545564 (+) /// mmu-mir-367 // chr3:127545733-127545807 (+) /// mmu-mir-302b // chr3:127545228-127545301 (+) /// mmu-mir-302c // chr3:127545363-127545430 (+) /// mmu-mir-302d // chr3:127545624-127545689 (+)
20500652	1.35967	0.31548	A	1.22847	0.16908	A	1.05048	-0.05673	A	1.07124	-0.0285	A	1.11399	0.02795	A	1.05048	-0.05673	A	1.21287	1.07857	1.12452	0.169309	0.219185	AA	0	miRNA	miRBase	Mus musculus	mmu-miR-302a-3p	chr3:127545539-127545561 (+)	23	UAAGUGCUUCCAUGUUUUGGUGA	MIMAT0000380_st	MIMAT0000380	ENSMUST00000029588 // antisense // intron // 8	mmu-mir-302a // chr3:127545496-127545564 (+) /// mmu-mir-367 // chr3:127545733-127545807 (+) /// mmu-mir-302b // chr3:127545228-127545301 (+) /// mmu-mir-302c // chr3:127545363-127545430 (+) /// mmu-mir-302d // chr3:127545624-127545689 (+)
20500653	1.52009	0.22145	A	1.31413	0.0114	A	1.05048	-0.31166	A	1.42163	0.12484	A	1.02241	-0.35073	A	1.29345	-0.01149	A	1.2949	1.24583	1.03939	0.0557335	0.813526	AA	0	miRNA	miRBase	Mus musculus	mmu-miR-34c-5p	chr9:51103076-51103098 (-)	23	AGGCAGUGUAGUUAGCUGAUUGC	MIMAT0000381_st	MIMAT0000381	---	mmu-mir-34c // chr9:51103034-51103110 (-) /// mmu-mir-34b // chr9:51103562-51103645 (-)
20500654	1.40637	0.05054	A	0.9462	-0.52122	A	1.27874	-0.08671	A	1.34987	-0.00861	A	1.36604	0.00856	A	1.52044	0.16305	A	1.21044	1.41212	0.857179	-0.222332	0.254765	AA	0	miRNA	miRBase	Mus musculus	mmu-miR-34c-3p	chr9:51103044-51103065 (-)	22	AAUCACUAACCACACAGCCAGG	MIMAT0004580_st	MIMAT0004580	---	mmu-mir-34c // chr9:51103034-51103110 (-) /// mmu-mir-34b // chr9:51103562-51103645 (-)
20500655	1.06421	-0.09541	A	0.9488	-0.26101	A	1.18154	0.05547	A	1.21893	0.10043	A	1.0924	-0.05769	A	1.22847	0.11167	A	1.06485	1.17993	0.902466	-0.148055	0.227223	AA	0	miRNA	miRBase	Mus musculus	mmu-miR-34b-5p	chr9:51103610-51103632 (-)	23	AGGCAGUGUAAUUAGCUGAUUGU	MIMAT0000382_st	MIMAT0000382	---	mmu-mir-34c // chr9:51103034-51103110 (-) /// mmu-mir-34b // chr9:51103562-51103645 (-)
20500656	1.23384	0.00629	A	1.22847	0	A	1.06698	-0.20333	A	0.85533	-0.5223	A	1.22847	0	A	1.22847	0	A	1.17643	1.10409	1.06552	0.0915577	0.593555	AA	0	miRNA	miRBase	Mus musculus	mmu-miR-34b-3p	chr9:51103574-51103595 (-)	22	AAUCACUAACUCCACUGCCAUC	MIMAT0004581_st	MIMAT0004581	---	mmu-mir-34c // chr9:51103034-51103110 (-) /// mmu-mir-34b // chr9:51103562-51103645 (-)
20500657	4.50306	-0.04297	P	24.876	2.42281	P	1.81533	-1.35364	P	4.93232	0.08839	P	4.77536	0.04173	P	1.79245	-1.37194	A	10.3981	3.83338	2.71253	1.43964	0.564838	PA	0	miRNA	miRBase	Mus musculus	mmu-let-7d-5p	chr13:48536078-48536099 (-)	22	AGAGGUAGUAGGUUGCAUAGUU	MIMAT0000383_st	MIMAT0000383	ENSMUST00000181490 // sense // exon // 1 /// OTTMUST00000112524 // sense // exon // 1	mmu-let-7d // chr13:48536012-48536114 (-) /// mmu-let-7a-1 // chr13:48538179-48538272 (-) /// mmu-let-7f-1 // chr13:48537829-48537917 (-)
20500658	1.96015	0.43099	P	1.44372	-0.01019	A	1.29001	-0.17259	A	1.45395	0	A	2.91514	1.00359	P	1.45395	0	A	1.56463	1.94101	0.806088	-0.310992	0.543849	PA	0	miRNA	miRBase	Mus musculus	mmu-let-7d-3p	chr13:48536024-48536045 (-)	22	CUAUACGACCUGCUGCCUUUCU	MIMAT0000384_st	MIMAT0000384	ENSMUST00000181490 // sense // exon // 1 /// OTTMUST00000112524 // sense // exon // 1	mmu-let-7d // chr13:48536012-48536114 (-) /// mmu-let-7a-1 // chr13:48538179-48538272 (-) /// mmu-let-7f-1 // chr13:48537829-48537917 (-)
20500659	13.8679	2.22662	P	4.56027	0.62206	P	2.37474	-0.31929	P	1.35688	-1.12677	A	3.55125	0.26127	P	1.31053	-1.17691	A	6.93429	2.07289	3.34523	1.74211	0.158367	PA	0	miRNA	miRBase	Mus musculus	mmu-miR-106a-5p	chrX:52742541-52742563 (-)	23	CAAAGUGCUAACAGUGCAGGUAG	MIMAT0000385_st	MIMAT0000385	ENSMUST00000133214 // sense // exon // 2 /// ENSMUST00000138156 // sense // exon // 2 /// ENSMUST00000143479 // sense // exon // 3 /// ENSMUST00000154488 // sense // exon // 2 /// OTTMUST00000042121 // sense // exon // 3 /// OTTMUST00000042258 // sense // exon // 2 /// OTTMUST00000042259 // sense // exon // 2 /// OTTMUST00000042260 // sense // exon // 2	mmu-mir-106a // chrX:52742503-52742567 (-) /// mmu-mir-19b-2 // chrX:52741983-52742066 (-) /// mmu-mir-92a-2 // chrX:52741838-52741928 (-) /// mmu-mir-363 // chrX:52741693-52741767 (-) /// mmu-mir-20b // chrX:52742113-52742192 (-) /// mmu-mir-18b // chrX:52742331-52742413 (-)
20500660	1.22847	0	A	1.22847	0	A	1.4366	0.2258	A	1.22847	0	A	1.22847	0	A	1.22847	0	A	1.29785	1.22847	1.05647	0.0792573	0.373901	AA	0	miRNA	miRBase	Mus musculus	mmu-miR-106a-3p	chrX:52742505-52742527 (-)	23	ACUGCAGUGCCAGCACUUCUUAC	MIMAT0017009_st	MIMAT0017009	ENSMUST00000133214 // sense // exon // 2 /// ENSMUST00000138156 // sense // exon // 2 /// ENSMUST00000143479 // sense // exon // 3 /// ENSMUST00000154488 // sense // exon // 2 /// OTTMUST00000042121 // sense // exon // 3 /// OTTMUST00000042258 // sense // exon // 2 /// OTTMUST00000042259 // sense // exon // 2 /// OTTMUST00000042260 // sense // exon // 2	mmu-mir-106a // chrX:52742503-52742567 (-) /// mmu-mir-19b-2 // chrX:52741983-52742066 (-) /// mmu-mir-92a-2 // chrX:52741838-52741928 (-) /// mmu-mir-363 // chrX:52741693-52741767 (-) /// mmu-mir-20b // chrX:52742113-52742192 (-) /// mmu-mir-18b // chrX:52742331-52742413 (-)
20500661	4.80192	1.51053	P	1.17659	-0.51847	A	2.41733	0.52033	P	1.34598	-0.32442	A	1.95096	0.21111	P	1.41981	-0.24738	A	2.79861	1.57225	1.78001	0.831882	0.363321	PA	0	miRNA	miRBase	Mus musculus	mmu-miR-106b-5p	chr5:138165787-138165807 (-)	21	UAAAGUGCUGACAGUGCAGAU	MIMAT0000386_st	MIMAT0000386	ENSMUST00000000505 // sense // intron // 13 /// ENSMUST00000148879 // sense // intron // 8 /// OTTMUST00000054327 // sense // intron // 13 /// OTTMUST00000054328 // sense // intron // 8	mmu-mir-106b // chr5:138165737-138165818 (-) /// mmu-mir-93 // chr5:138165523-138165610 (-) /// mmu-mir-25 // chr5:138165321-138165404 (-)
20500662	2.98899	0.99612	P	1.1652	-0.36296	A	1.13053	-0.40654	A	1.49852	0	A	1.77659	0.24557	A	1.49852	0	A	1.76157	1.59121	1.10707	0.14674	0.989866	PA	0	miRNA	miRBase	Mus musculus	mmu-miR-106b-3p	chr5:138165746-138165767 (-)	22	CCGCACUGUGGGUACUUGCUGC	MIMAT0004582_st	MIMAT0004582	ENSMUST00000000505 // sense // intron // 13 /// ENSMUST00000148879 // sense // intron // 8 /// OTTMUST00000054327 // sense // intron // 13 /// OTTMUST00000054328 // sense // intron // 8	mmu-mir-106b // chr5:138165737-138165818 (-) /// mmu-mir-93 // chr5:138165523-138165610 (-) /// mmu-mir-25 // chr5:138165321-138165404 (-)
20500663	1.23771	-0.01715	A	1.2673	0.01695	A	1.47165	0.23262	A	1.08369	-0.20886	A	1.02595	-0.28786	A	1.48278	0.24349	P	1.32555	1.19747	1.10696	0.146601	0.426505	PA	0	miRNA	miRBase	Mus musculus	mmu-miR-130b-5p	chr16:17124109-17124130 (-)	22	ACUCUUUCCCUGUUGCACUACU	MIMAT0004583_st	MIMAT0004583	ENSMUST00000093336 // sense // intron // 1	mmu-mir-130b // chr16:17124061-17124142 (-) /// mmu-mir-301b // chr16:17124400-17124496 (-)
20500664	22.8935	3.44259	P	1.83851	-0.19574	P	67.485	5.00222	P	1.31562	-0.67853	A	2.37282	0.17233	P	1.17187	-0.84547	A	30.739	1.6201	18.9735	4.24591	0.111463	PA	0	miRNA	miRBase	Mus musculus	mmu-miR-130b-3p	chr16:17124071-17124092 (-)	22	CAGUGCAAUGAUGAAAGGGCAU	MIMAT0000387_st	MIMAT0000387	ENSMUST00000093336 // sense // intron // 1	mmu-mir-130b // chr16:17124061-17124142 (-) /// mmu-mir-301b // chr16:17124400-17124496 (-)
20500665	0.91845	-0.54987	A	1.11084	-0.27549	A	1.46066	0.11948	A	1.95819	0.54238	P	1.6445	0.29051	P	1.22847	-0.13028	A	1.16332	1.61039	0.722383	-0.469163	0.164284	PA	0	miRNA	miRBase	Drosophila melanogaster	dme-miR-303-5p	X:4260253-4260275 (-)	23	UUUAGGUUUCACAGGAAACUGGU	MIMAT0000388_st	MIMAT0000388	---	dme-mir-303 // X:4260212-4260281 (-) /// dme-mir-982 // X:4259839-4259931 (-) /// dme-mir-983-1 // X:4262342-4262432 (-) /// dme-mir-983-2 // X:4262516-4262614 (-) /// dme-mir-984 // X:4262679-4262768 (-)
20500666	1.05048	-0.44287	A	1.45727	0.02934	A	1.43433	0.00645	A	1.69023	0.24329	A	1.05048	-0.44287	A	1.42154	-0.00647	A	1.31403	1.38742	0.947103	-0.0784066	0.803943	AA	0	miRNA	miRBase	Drosophila melanogaster	dme-miR-303-3p	X:4260218-4260239 (-)	22	CUAGUUUCCUCUAAAAUCCUAA	MIMAT0020824_st	MIMAT0020824	---	dme-mir-303 // X:4260212-4260281 (-) /// dme-mir-982 // X:4259839-4259931 (-) /// dme-mir-983-1 // X:4262342-4262432 (-) /// dme-mir-983-2 // X:4262516-4262614 (-) /// dme-mir-984 // X:4262679-4262768 (-)
20500667	1.04021	-0.02564	A	1.07752	0.02519	A	1.04021	-0.02564	A	1.19765	0.17769	A	0.92711	-0.19171	A	1.26008	0.251	A	1.05265	1.12828	0.932966	-0.100104	0.559803	AA	0	miRNA	miRBase	Drosophila melanogaster	dme-miR-31b-5p	X:8887430-8887451 (-)	22	UGGCAAGAUGUCGGAAUAGCUG	MIMAT0000389_st	MIMAT0000389	FBtr0302660 // antisense // intron // 1 /// FBtr0302661 // antisense // intron // 2 /// FBtr0302663 // antisense // intron // 3 /// FBtr0302664 // antisense // intron // 3 /// FBtr0302665 // antisense // intron // 1 /// FBtr0332279 // sense // intron // 2 /// FBtr0332280 // sense // intron // 2 /// FBtr0332281 // sense // intron // 2 /// FBtr0333601 // antisense // intron // 1 /// FBtr0333602 // …	---
20500668	1.13075	0	A	1.79219	0.66445	A	0.98	-0.20643	A	1.13075	0	A	1.18387	0.06623	A	1.12954	-0.00155	A	1.30098	1.14805	1.13321	0.180409	0.645111	AA	0	miRNA	miRBase	Drosophila melanogaster	dme-miR-31b-3p	X:8887350-8887371 (-)	22	GGCUAUGCCUCAUCUAGUCAAU	MIMAT0020825_st	MIMAT0020825	FBtr0302660 // antisense // intron // 1 /// FBtr0302661 // antisense // intron // 2 /// FBtr0302663 // antisense // intron // 3 /// FBtr0302664 // antisense // intron // 3 /// FBtr0302665 // antisense // intron // 1 /// FBtr0332279 // sense // intron // 2 /// FBtr0332280 // sense // intron // 2 /// FBtr0332281 // sense // intron // 2 /// FBtr0333601 // antisense // intron // 1 /// FBtr0333602 // …	---
20500669	1.14318	-0.07853	A	1.38523	0.19855	A	1.22847	0.02527	A	1.14669	-0.07411	A	1.1858	-0.02572	A	1.36343	0.17565	A	1.25229	1.23197	1.01649	0.0236015	0.8453	AA	0	miRNA	miRBase	Drosophila melanogaster	dme-miR-304-5p	X:15403003-15403025 (+)	23	UAAUCUCAAUUUGUAAAUGUGAG	MIMAT0000390_st	MIMAT0000390	FBtr0074042 // sense // intron // 5 /// FBtr0074043 // sense // intron // 4	dme-mir-12 // X:15403506-15403579 (+) /// dme-mir-283 // X:15401989-15402088 (+) /// dme-mir-304 // X:15402992-15403079 (+)
20500670	1.17292	0.14411	A	1.06141	0	A	1.21582	0.19594	A	1.06141	0	A	0.92662	-0.19594	A	1.06141	0	A	1.15005	1.01648	1.1314	0.178115	0.111469	AA	0	miRNA	miRBase	Drosophila melanogaster	dme-miR-304-3p	X:15403049-15403070 (+)	22	CACUUUGCAAUUGGAGAUUGCU	MIMAT0020826_st	MIMAT0020826	FBtr0074042 // sense // intron // 5 /// FBtr0074043 // sense // intron // 4	dme-mir-12 // X:15403506-15403579 (+) /// dme-mir-283 // X:15401989-15402088 (+) /// dme-mir-304 // X:15402992-15403079 (+)
20500671	1.3644	0.18097	A	0.95509	-0.33359	A	1.18624	-0.02091	A	1.22087	0.02061	A	1.08813	-0.14546	A	1.55717	0.37163	A	1.16858	1.28872	0.906771	-0.14119	0.547741	AA	0	miRNA	miRBase	Drosophila melanogaster	dme-miR-305-5p	2L:7425979-7426001 (+)	23	AUUGUACUUCAUCAGGUGCUCUG	MIMAT0000391_st	MIMAT0000391	---	dme-mir-275 // 2L:7425795-7425892 (+) /// dme-mir-305 // 2L:7425972-7426044 (+)
20500672	0.91239	-0.21919	A	1.07372	0.0157	A	1.29768	0.28901	A	0.9638	-0.14012	A	1.07372	0.0157	A	1.05048	-0.01587	A	1.0946	1.02933	1.0634	0.0886891	0.651332	AA	0	miRNA	miRBase	Drosophila melanogaster	dme-miR-305-3p	2L:7426017-7426039 (+)	23	CGGCACAUGUUGAAGUACACUCA	MIMAT0020827_st	MIMAT0020827	---	dme-mir-275 // 2L:7425795-7425892 (+) /// dme-mir-305 // 2L:7425972-7426044 (+)
20500673	1.0924	0	A	0.87448	-0.32101	A	1.0924	0	A	1.0924	0	A	1.136	0.05645	A	1.17937	0.11051	A	1.01976	1.13592	0.897737	-0.155636	0.218913	AA	0	miRNA	miRBase	Drosophila melanogaster	dme-miR-9c-5p	2L:16697936-16697957 (+)	22	UCUUUGGUAUUCUAGCUGUAGA	MIMAT0000392_st	MIMAT0000392	FBtr0080884 // sense // intron // 5 /// FBtr0080885 // sense // intron // 6 /// FBtr0080886 // sense // intron // 5 /// FBtr0100459 // sense // intron // 3	dme-mir-79 // 2L:16698554-16698650 (+) /// dme-mir-9c // 2L:16697924-16698015 (+) /// dme-mir-306 // 2L:16698404-16698488 (+) /// dme-mir-9b // 2L:16698744-16698834 (+)
20500674	1.05048	-0.24848	A	1.29302	0.05121	A	1.26739	0.02233	A	1.22847	-0.02268	A	1.0418	-0.26046	A	1.44858	0.21511	A	1.20363	1.23962	0.97097	-0.0425021	0.841646	AA	0	miRNA	miRBase	Drosophila melanogaster	dme-miR-9c-3p	2L:16697984-16698005 (+)	22	UAAAGCUUUUAUACCAAAGCUC	MIMAT0020828_st	MIMAT0020828	FBtr0080884 // sense // intron // 5 /// FBtr0080885 // sense // intron // 6 /// FBtr0080886 // sense // intron // 5 /// FBtr0100459 // sense // intron // 3	dme-mir-79 // 2L:16698554-16698650 (+) /// dme-mir-9c // 2L:16697924-16698015 (+) /// dme-mir-306 // 2L:16698404-16698488 (+) /// dme-mir-9b // 2L:16698744-16698834 (+)
20500675	1.16828	-0.05224	A	1.19425	-0.02052	A	1.22847	0.02023	A	1.2611	0.05805	A	1.05554	-0.19864	A	1.46066	0.27	A	1.197	1.2591	0.950679	-0.0729697	0.681111	AA	0	miRNA	miRBase	Drosophila melanogaster	dme-miR-306-5p	2L:16698418-16698439 (+)	22	UCAGGUACUUAGUGACUCUCAA	MIMAT0000393_st	MIMAT0000393	FBtr0080884 // sense // intron // 6 /// FBtr0080885 // sense // intron // 7 /// FBtr0080886 // sense // intron // 6 /// FBtr0100459 // sense // intron // 4	dme-mir-79 // 2L:16698554-16698650 (+) /// dme-mir-9c // 2L:16697924-16698015 (+) /// dme-mir-306 // 2L:16698404-16698488 (+) /// dme-mir-9b // 2L:16698744-16698834 (+)
20500676	1.63933	0.30706	A	1.22847	-0.10919	A	1.46796	0.14777	A	1.11551	-0.24835	A	1.42163	0.1015	A	1.22847	-0.10919	A	1.44525	1.2552	1.15141	0.203401	0.27381	AA	0	miRNA	miRBase	Drosophila melanogaster	dme-miR-306-3p	2L:16698455-16698476 (+)	22	GGGGGUCACUCUGUGCCUGUGC	MIMAT0000394_st	MIMAT0000394	FBtr0080884 // sense // intron // 6 /// FBtr0080885 // sense // intron // 7 /// FBtr0080886 // sense // intron // 6 /// FBtr0100459 // sense // intron // 4	dme-mir-79 // 2L:16698554-16698650 (+) /// dme-mir-9c // 2L:16697924-16698015 (+) /// dme-mir-306 // 2L:16698404-16698488 (+) /// dme-mir-9b // 2L:16698744-16698834 (+)
20500677	1.18565	0.1464	A	1.07124	0	A	1.07124	0	A	0.96957	-0.14386	A	0.93112	-0.20223	A	1.22847	0.19758	A	1.10938	1.04305	1.06359	0.0889364	0.503545	AA	0	miRNA	miRBase	Drosophila melanogaster	dme-miR-9b-5p	2L:16698758-16698780 (+)	23	UCUUUGGUGAUUUUAGCUGUAUG	MIMAT0000395_st	MIMAT0000395	FBtr0080884 // sense // intron // 6 /// FBtr0080885 // sense // intron // 7 /// FBtr0080886 // sense // intron // 6 /// FBtr0100459 // sense // intron // 4	dme-mir-79 // 2L:16698554-16698650 (+) /// dme-mir-9c // 2L:16697924-16698015 (+) /// dme-mir-306 // 2L:16698404-16698488 (+) /// dme-mir-9b // 2L:16698744-16698834 (+)
20500678	1.38148	0.11858	A	1.18133	-0.10722	A	1.32847	0.06213	A	1.26238	-0.01149	A	1.28256	0.0114	A	1.22847	-0.05077	A	1.29709	1.2578	1.03124	0.0443759	0.586805	AA	0	miRNA	miRBase	Drosophila melanogaster	dme-miR-9b-3p	2L:16698799-16698820 (+)	22	UAGAGCUUUAUUACCAAAAACC	MIMAT0020829_st	MIMAT0020829	FBtr0080884 // sense // intron // 6 /// FBtr0080885 // sense // intron // 7 /// FBtr0080886 // sense // intron // 6 /// FBtr0100459 // sense // intron // 4	dme-mir-79 // 2L:16698554-16698650 (+) /// dme-mir-9c // 2L:16697924-16698015 (+) /// dme-mir-306 // 2L:16698404-16698488 (+) /// dme-mir-9b // 2L:16698744-16698834 (+)
20500679	1.24354	-0.19139	A	1.41996	0	A	1.24354	-0.19139	A	1.41996	0	A	2.82875	0.99431	P	1.68836	0.24977	A	1.30235	1.97902	0.658075	-0.603675	0.150424	PA	0	miRNA	miRBase	Drosophila melanogaster	dme-let-7-5p	2L:18472044-18472064 (+)	21	UGAGGUAGUAGGUUGUAUAGU	MIMAT0000396_st	MIMAT0000396	FBtr0306973 // sense // exon // 2	dme-mir-100 // 2L:18471434-18471533 (+) /// dme-let-7 // 2L:18472034-18472111 (+) /// dme-mir-125 // 2L:18472315-18472424 (+)
20500680	1.22847	0.01694	A	1.11167	-0.12718	A	1.19979	-0.01714	A	1.0796	-0.16942	A	1.44938	0.25552	A	1.54575	0.34839	A	1.17998	1.35824	0.868752	-0.202984	0.320306	AA	0	miRNA	miRBase	Drosophila melanogaster	dme-let-7-3p	2L:18472082-18472103 (+)	22	CUAUACAAUGUGCUAGCUUUCU	MIMAT0020830_st	MIMAT0020830	FBtr0306973 // sense // exon // 2	dme-mir-100 // 2L:18471434-18471533 (+) /// dme-let-7 // 2L:18472034-18472111 (+) /// dme-mir-125 // 2L:18472315-18472424 (+)
20500681	6.22573	2.07227	P	1.54615	0.06271	A	1.41462	-0.06556	A	1.39077	-0.09009	A	8.81032	2.57322	P	1.39089	-0.08996	A	3.06217	3.86399	0.792488	-0.33554	0.928239	PA	0	miRNA	miRBase	Drosophila melanogaster	dme-miR-125-5p	2L:18472343-18472364 (+)	22	UCCCUGAGACCCUAACUUGUGA	MIMAT0000397_st	MIMAT0000397	FBtr0306973 // sense // exon // 2	dme-mir-100 // 2L:18471434-18471533 (+) /// dme-let-7 // 2L:18472034-18472111 (+) /// dme-mir-125 // 2L:18472315-18472424 (+)
20500682	1.22847	0.08345	A	1.51021	0.38134	A	1.20717	0.05822	A	1.11167	-0.06067	A	1.03227	-0.16758	A	1.06902	-0.11712	A	1.31528	1.07099	1.2281	0.296433	0.0555792	AA	0	miRNA	miRBase	Drosophila melanogaster	dme-miR-125-3p	2L:18472382-18472402 (+)	21	ACAAGUUUUGAUCUCCGGUAU	MIMAT0020831_st	MIMAT0020831	FBtr0306973 // sense // exon // 2	dme-mir-100 // 2L:18471434-18471533 (+) /// dme-let-7 // 2L:18472034-18472111 (+) /// dme-mir-125 // 2L:18472315-18472424 (+)
20500683	1.28643	0.08438	A	1.2196	0.00742	A	1.20709	-0.00745	A	1.41161	0.21835	A	1.08699	-0.15865	A	1.09478	-0.14836	A	1.23771	1.19779	1.03332	0.0472904	0.673823	AA	0	miRNA	miRBase	Drosophila melanogaster	dme-miR-307a-5p	2R:5508810-5508831 (-)	22	ACUCACUCAACCUGGGUGUGAU	MIMAT0020832_st	MIMAT0020832	FBtr0088501 // sense // intron // 3 /// FBtr0304171 // antisense // exon // 1	dme-mir-307a // 2R:5508756-5508843 (-) /// dme-mir-307b // 2R:5508739-5508858 (+)
20500684	1.29986	0.25557	A	1.22847	0.17408	A	0.97901	-0.15339	A	1.05048	-0.05173	A	1.05048	-0.05173	A	1.12718	0.04994	A	1.16911	1.07605	1.08649	0.119674	0.443732	AA	0	miRNA	miRBase	Drosophila melanogaster	dme-miR-307a-3p	2R:5508769-5508788 (-)	20	UCACAACCUCCUUGAGUGAG	MIMAT0000398_st	MIMAT0000398	FBtr0088501 // sense // intron // 3 /// FBtr0304171 // antisense // exon // 1	dme-mir-307a // 2R:5508756-5508843 (-) /// dme-mir-307b // 2R:5508739-5508858 (+)
20500685	1.1431	0.00194	A	1.1723	0.03833	A	0.96623	-0.24057	A	1.14003	-0.00195	A	0.86117	-0.40665	A	1.39388	0.2881	A	1.09388	1.13169	0.966584	-0.049033	0.909448	AA	0	miRNA	miRBase	Drosophila melanogaster	dme-miR-308-5p	2R:10103346-10103367 (-)	22	CGCAGUAUAUUUUUGUGUUUUG	MIMAT0020833_st	MIMAT0020833	FBtr0087575 // sense // intron // 2	---
20500686	1.11029	-0.1129	A	1.2984	0.1129	A	1.20067	0	A	1.20067	0	A	1.20067	0	A	1.06768	-0.16935	A	1.20312	1.15634	1.04046	0.0572149	0.548421	AA	0	miRNA	miRBase	Drosophila melanogaster	dme-miR-308-3p	2R:10103307-10103328 (-)	22	AAUCACAGGAUUAUACUGUGAG	MIMAT0000399_st	MIMAT0000399	FBtr0087575 // sense // intron // 2	---
20500687	1.85961	0.34964	A	1.81549	0.31499	A	1.50285	0.04234	A	1.41592	-0.04362	A	1.41592	-0.04362	A	1.25163	-0.22155	A	1.72598	1.36116	1.26803	0.342585	0.0409794	AA	0	miRNA	miRBase	Drosophila melanogaster	dme-miR-31a-5p	2R:13671356-13671378 (-)	23	UGGCAAGAUGUCGGCAUAGCUGA	MIMAT0000400_st	MIMAT0000400	---	---
20500688	1.00984	-0.17911	A	1.10992	-0.04278	A	1.37855	0.26991	A	1.10992	-0.04278	A	1.21992	0.09355	A	1.17673	0.04155	A	1.1661	1.16886	0.997644	-0.00340239	0.920355	AA	0	miRNA	miRBase	Drosophila melanogaster	dme-miR-31a-3p	2R:13671311-13671332 (-)	22	CGCUAUGCUGCAUCUAGUCAGU	MIMAT0020834_st	MIMAT0020834	---	---
20500689	1.22847	0.1129	A	1.136	0	A	1.05048	-0.1129	A	1.136	0	A	1.24858	0.13633	A	1.05048	-0.1129	A	1.13832	1.14502	0.994146	-0.00847084	0.939803	AA	0	miRNA	miRBase	Drosophila melanogaster	dme-miR-309-5p	2R:15549252-15549273 (-)	22	CGACAAACCUUGUUCGGUUUUG	MIMAT0020835_st	MIMAT0020835	---	dme-mir-3 // 2R:15549100-15549168 (-) /// dme-mir-4 // 2R:15548794-15548874 (-) /// dme-mir-5 // 2R:15548663-15548731 (-) /// dme-mir-6-1 // 2R:15548508-15548589 (-) /// dme-mir-6-2 // 2R:15548374-15548447 (-) /// dme-mir-6-3 // 2R:15548221-15548300 (-) /// dme-mir-286 // 2R:15548927-15549026 (-) /// dme-mir-309 // 2R:15549211-15549279 (-)
20500690	1.06975	0.0281	A	1.05048	0.00187	A	1.04776	-0.00187	A	1.04776	-0.00187	A	0.97503	-0.10567	A	1.23166	0.23142	A	1.056	1.08482	0.973433	-0.038846	0.765754	AA	0	miRNA	miRBase	Drosophila melanogaster	dme-miR-309-3p	2R:15549215-15549236 (-)	22	GCACUGGGUAAAGUUUGUCCUA	MIMAT0000401_st	MIMAT0000401	---	dme-mir-3 // 2R:15549100-15549168 (-) /// dme-mir-4 // 2R:15548794-15548874 (-) /// dme-mir-5 // 2R:15548663-15548731 (-) /// dme-mir-6-1 // 2R:15548508-15548589 (-) /// dme-mir-6-2 // 2R:15548374-15548447 (-) /// dme-mir-6-3 // 2R:15548221-15548300 (-) /// dme-mir-286 // 2R:15548927-15549026 (-) /// dme-mir-309 // 2R:15549211-15549279 (-)
20500691	8.58557	0.67477	P	1.4986	-1.84353	A	13.9673	1.37684	P	2.17097	-1.3088	A	14.1801	1.39865	P	1.23292	-2.12507	A	8.01716	5.86132	1.36781	0.451866	0.632269	PA	0	miRNA	miRBase	Drosophila melanogaster	dme-miR-310-5p	2R:16471308-16471330 (-)	23	AGGGCGGGUCGUGUGUCAGUGUA	MIMAT0020836_st	MIMAT0020836	---	dme-mir-310 // 2R:16471257-16471345 (-) /// dme-mir-311 // 2R:16471382-16471465 (-) /// dme-mir-312 // 2R:16471561-16471626 (-) /// dme-mir-313 // 2R:16471695-16471765 (-) /// dme-mir-991 // 2R:16472705-16472800 (-) /// dme-mir-992 // 2R:16472819-16472910 (-) /// dme-mir-2498 // 2R:16472214-16472325 (-)
20500692	1.19685	-0.13028	A	1.15571	-0.18074	A	1.13076	-0.21223	A	1.63157	0.31673	A	1.63268	0.31772	A	1.42307	0.11948	A	1.16111	1.56244	0.743137	-0.4283	0.00371415	AA	0	miRNA	miRBase	Drosophila melanogaster	dme-miR-310-3p	2R:16471271-16471292 (-)	22	UAUUGCACACUUCCCGGCCUUU	MIMAT0000402_st	MIMAT0000402	---	dme-mir-310 // 2R:16471257-16471345 (-) /// dme-mir-311 // 2R:16471382-16471465 (-) /// dme-mir-312 // 2R:16471561-16471626 (-) /// dme-mir-313 // 2R:16471695-16471765 (-) /// dme-mir-991 // 2R:16472705-16472800 (-) /// dme-mir-992 // 2R:16472819-16472910 (-) /// dme-mir-2498 // 2R:16472214-16472325 (-)
20500693	1.22847	0.02987	A	1.2033	0	A	1.07124	-0.16771	A	1.25274	0.05809	A	0.95259	-0.33706	A	1.2033	0	A	1.16767	1.13621	1.02769	0.0394031	0.749785	AA	0	miRNA	miRBase	Drosophila melanogaster	dme-miR-311-5p	2R:16471429-16471451 (-)	23	CGGACGGUAUAUGGGUUAAUAUU	MIMAT0020837_st	MIMAT0020837	---	dme-mir-310 // 2R:16471257-16471345 (-) /// dme-mir-311 // 2R:16471382-16471465 (-) /// dme-mir-312 // 2R:16471561-16471626 (-) /// dme-mir-313 // 2R:16471695-16471765 (-) /// dme-mir-991 // 2R:16472705-16472800 (-) /// dme-mir-992 // 2R:16472819-16472910 (-) /// dme-mir-2498 // 2R:16472214-16472325 (-)
20500694	8.95651	-1.08323	P	18.5112	-0.03584	P	3.13759	-2.59651	P	55.7871	1.55569	P	19.4425	0.03497	P	98.0414	2.36915	P	10.2018	57.757	0.176633	-2.50117	0.064473	PP	0	miRNA	miRBase	Drosophila melanogaster	dme-miR-311-3p	2R:16471393-16471414 (-)	22	UAUUGCACAUUCACCGGCCUGA	MIMAT0000403_st	MIMAT0000403	---	dme-mir-310 // 2R:16471257-16471345 (-) /// dme-mir-311 // 2R:16471382-16471465 (-) /// dme-mir-312 // 2R:16471561-16471626 (-) /// dme-mir-313 // 2R:16471695-16471765 (-) /// dme-mir-991 // 2R:16472705-16472800 (-) /// dme-mir-992 // 2R:16472819-16472910 (-) /// dme-mir-2498 // 2R:16472214-16472325 (-)
20500695	1.87406	0.33871	P	1.48402	0.00206	A	1.47979	-0.00206	A	1.25367	-0.2413	A	1.62318	0.13137	A	1.34366	-0.14129	A	1.61262	1.40684	1.14628	0.196955	0.282766	PA	0	miRNA	miRBase	Drosophila melanogaster	dme-miR-312-5p	2R:16471600-16471622 (-)	23	UGGUUCGUCACAAGGGCAAUUCU	MIMAT0020838_st	MIMAT0020838	---	dme-mir-310 // 2R:16471257-16471345 (-) /// dme-mir-311 // 2R:16471382-16471465 (-) /// dme-mir-312 // 2R:16471561-16471626 (-) /// dme-mir-313 // 2R:16471695-16471765 (-) /// dme-mir-991 // 2R:16472705-16472800 (-) /// dme-mir-992 // 2R:16472819-16472910 (-) /// dme-mir-2498 // 2R:16472214-16472325 (-)
20500696	1.55211	0.5331	A	1.05048	-0.03007	A	1.07261	0	A	1.07261	0	A	1.28052	0.25561	A	1.07261	0	A	1.22507	1.14191	1.07282	0.101407	0.703685	AA	0	miRNA	miRBase	Drosophila melanogaster	dme-miR-312-3p	2R:16471563-16471584 (-)	22	UAUUGCACUUGAGACGGCCUGA	MIMAT0000404_st	MIMAT0000404	---	dme-mir-310 // 2R:16471257-16471345 (-) /// dme-mir-311 // 2R:16471382-16471465 (-) /// dme-mir-312 // 2R:16471561-16471626 (-) /// dme-mir-313 // 2R:16471695-16471765 (-) /// dme-mir-991 // 2R:16472705-16472800 (-) /// dme-mir-992 // 2R:16472819-16472910 (-) /// dme-mir-2498 // 2R:16472214-16472325 (-)
20500697	6.8685	0.30261	P	1.48402	-1.90787	A	10.7939	0.95476	P	5.44006	-0.03376	P	5.69766	0.03299	P	1.06226	-2.39025	A	6.38214	4.06666	1.56938	0.650196	0.647897	PA	0	miRNA	miRBase	Drosophila melanogaster	dme-miR-313-5p	2R:16471738-16471759 (-)	22	UGCUGCGGAUGGGGGCAGUACU	MIMAT0020839_st	MIMAT0020839	---	dme-mir-310 // 2R:16471257-16471345 (-) /// dme-mir-311 // 2R:16471382-16471465 (-) /// dme-mir-312 // 2R:16471561-16471626 (-) /// dme-mir-313 // 2R:16471695-16471765 (-) /// dme-mir-991 // 2R:16472705-16472800 (-) /// dme-mir-992 // 2R:16472819-16472910 (-) /// dme-mir-2498 // 2R:16472214-16472325 (-)
20500698	1.3927	0.06523	A	1.33113	0	A	1.17197	-0.18371	A	1.33113	0	A	1.79245	0.42928	P	1.33113	0	A	1.2986	1.4849	0.874535	-0.193412	0.321005	PA	0	miRNA	miRBase	Drosophila melanogaster	dme-miR-313-3p	2R:16471699-16471720 (-)	22	UAUUGCACUUUUCACAGCCCGA	MIMAT0000405_st	MIMAT0000405	---	dme-mir-310 // 2R:16471257-16471345 (-) /// dme-mir-311 // 2R:16471382-16471465 (-) /// dme-mir-312 // 2R:16471561-16471626 (-) /// dme-mir-313 // 2R:16471695-16471765 (-) /// dme-mir-991 // 2R:16472705-16472800 (-) /// dme-mir-992 // 2R:16472819-16472910 (-) /// dme-mir-2498 // 2R:16472214-16472325 (-)
20500699	1.27503	-0.00176	A	1.27814	0.00176	A	1.33954	0.06945	A	1.62105	0.34463	A	1.12711	-0.17967	A	1.14547	-0.15636	A	1.29757	1.29788	0.999764	-0.000340925	0.912123	AA	0	miRNA	miRBase	Drosophila melanogaster	dme-miR-314-5p	3L:11766114-11766139 (+)	26	GUAACUUGUGUGGCUUCGAACUUACC	MIMAT0020840_st	MIMAT0020840	---	dme-mir-314 // 3L:11766112-11766201 (+) /// dme-mir-956 // 3L:11766831-11766978 (-)
20500700	1.02767	-0.2423	A	1.38367	0.18683	A	1.36669	0.16901	A	1.02767	-0.2423	A	1.67152	0.45949	A	1.06452	-0.19147	A	1.25934	1.25457	1.0038	0.00547869	0.917632	AA	0	miRNA	miRBase	Drosophila melanogaster	dme-miR-314-3p	3L:11766181-11766201 (+)	21	UAUUCGAGCCAAUAAGUUCGG	MIMAT0000406_st	MIMAT0000406	---	dme-mir-314 // 3L:11766112-11766201 (+) /// dme-mir-956 // 3L:11766831-11766978 (-)
20500701	1.1315	-0.00573	A	1.05048	-0.11291	A	1.12702	-0.01146	A	1.14051	0.00571	A	1.14504	0.01143	A	1.22847	0.11289	A	1.103	1.17134	0.941657	-0.0867271	0.152974	AA	0	miRNA	miRBase	Drosophila melanogaster	dme-miR-315-5p	3L:18854082-18854103 (+)	22	UUUUGAUUGUUGCUCAGAAAGC	MIMAT0000407_st	MIMAT0000407	---	---
20500702	1.21582	0	A	1.21582	0	A	1.60156	0.39755	A	1.2033	-0.01493	A	1.05048	-0.21087	A	1.22847	0.01493	A	1.3444	1.16075	1.15822	0.211905	0.248416	AA	0	miRNA	miRBase	Drosophila melanogaster	dme-miR-315-3p	3L:18854124-18854145 (+)	22	CUUUCGAGCAAUAAUUGAAACC	MIMAT0020841_st	MIMAT0020841	---	---
20500703	1.41393	0.31134	A	0.91239	-0.32064	A	1.05048	-0.11732	A	0.9488	-0.26419	A	1.27749	0.16494	A	1.22847	0.10849	A	1.1256	1.15159	0.977434	-0.0329288	0.853405	AA	0	miRNA	miRBase	Drosophila melanogaster	dme-miR-316-5p	3L:21661866-21661887 (-)	22	UGUCUUUUUCCGCUUACUGGCG	MIMAT0000408_st	MIMAT0000408	---	---
20500704	1.94708	0.39348	P	1.26486	-0.22886	A	1.50393	0.0209	A	1.57354	0.08618	A	1.34556	-0.13963	A	1.46066	-0.02121	A	1.57196	1.45992	1.07674	0.106672	0.675231	PA	0	miRNA	miRBase	Drosophila melanogaster	dme-miR-316-3p	3L:21661828-21661849 (-)	22	ACAGGAAAGGGAAAAAGGCGUA	MIMAT0020842_st	MIMAT0020842	---	---
20500705	0.95042	-0.26943	A	1.00845	-0.18393	A	1.13007	-0.01966	A	1.86083	0.69988	A	1.16108	0.0194	A	1.29006	0.17136	A	1.02965	1.43732	0.716364	-0.481235	0.106388	AA	0	miRNA	miRBase	Drosophila melanogaster	dme-miR-317-5p	3R:5916861-5916882 (+)	22	UGGGAUACACCCUGUGCUCGCU	MIMAT0020843_st	MIMAT0020843	---	dme-mir-277 // 3R:5925744-5925843 (+) /// dme-mir-34 // 3R:5926658-5926756 (+) /// dme-mir-317 // 3R:5916848-5916939 (+)
20500706	1.35967	0.07135	A	1.47684	0.19059	A	1.22847	-0.07506	A	1.22847	-0.07506	A	1.48402	0.1976	A	1.22847	-0.07506	A	1.35499	1.31365	1.03147	0.0447011	0.716097	AA	0	miRNA	miRBase	Drosophila melanogaster	dme-miR-317-3p	3R:5916903-5916926 (+)	24	UGAACACAGCUGGUGGUAUCCAGU	MIMAT0000409_st	MIMAT0000409	---	dme-mir-277 // 3R:5925744-5925843 (+) /// dme-mir-34 // 3R:5926658-5926756 (+) /// dme-mir-317 // 3R:5916848-5916939 (+)
20500707	0.97158	-0.17857	A	1.07162	-0.03719	A	1.13566	0.04655	A	1.33954	0.28477	A	1.12758	0.03625	A	1.07162	-0.03719	A	1.05962	1.17958	0.898303	-0.154726	0.26807	AA	0	miRNA	miRBase	Drosophila melanogaster	dme-miR-318-5p	3R:6234030-6234051 (+)	22	GGAUACACACAGUUCAGUUUUG	MIMAT0020844_st	MIMAT0020844	---	dme-mir-318 // 3R:6234024-6234091 (+) /// dme-mir-994 // 3R:6233859-6233949 (+)
20500708	1.03675	-0.05153	A	1.03675	-0.05153	A	1.03675	-0.05153	A	1.11215	0.04975	A	1.22847	0.19326	A	1.15104	0.09935	A	1.03675	1.16389	0.890765	-0.166883	0.0170115	AA	0	miRNA	miRBase	Drosophila melanogaster	dme-miR-318-3p	3R:6234066-6234087 (+)	22	UCACUGGGCUUUGUUUAUCUCA	MIMAT0000410_st	MIMAT0000410	---	dme-mir-318 // 3R:6234024-6234091 (+) /// dme-mir-994 // 3R:6233859-6233949 (+)
20500709	1.35967	0.1464	A	1.22847	0	A	1.22847	0	A	1.22847	0	A	1.22847	0	A	1.22847	0	A	1.2722	1.22847	1.0356	0.0504666	0.373901	AA	0	miRNA	miRBase	Drosophila melanogaster	dme-miR-2c-5p	3R:11243524-11243548 (-)	25	UCAUCAAAAAGGGCUGAAGAAAGAU	MIMAT0020845_st	MIMAT0020845	---	dme-mir-13a // 3R:11243264-11243338 (-) /// dme-mir-13b-1 // 3R:11243130-11243197 (-) /// dme-mir-2c // 3R:11243466-11243567 (-)
20500710	1.22638	0.03317	A	1.08298	-0.14623	A	1.28383	0.09923	A	1.25725	0.06905	A	0.98468	-0.28351	A	1.17062	-0.03396	A	1.19773	1.13752	1.05293	0.074415	0.573686	AA	0	miRNA	miRBase	Drosophila melanogaster	dme-miR-2c-3p	3R:11243483-11243505 (-)	23	UAUCACAGCCAGCUUUGAUGGGC	MIMAT0000411_st	MIMAT0000411	---	dme-mir-13a // 3R:11243264-11243338 (-) /// dme-mir-13b-1 // 3R:11243130-11243197 (-) /// dme-mir-2c // 3R:11243466-11243567 (-)
20500711	1.32364	0.03322	A	1.42416	0.13881	P	1.2435	-0.05689	A	1.38848	0.10221	A	1.26339	-0.034	A	1.13147	-0.1931	A	1.33043	1.26111	1.05497	0.0771983	0.478146	PA	0	miRNA	miRBase	Drosophila melanogaster	dme-miR-iab-4-5p	3R:12682003-12682024 (+)	22	ACGUAUACUGAAUGUAUCCUGA	MIMAT0000412_st	MIMAT0000412	FBtr0083362 // sense // exon // 3 /// FBtr0306338 // antisense // intron // 4 /// FBtr0306339 // antisense // intron // 4 /// FBtr0306340 // antisense // intron // 5 /// FBtr0309897 // antisense // intron // 5	dme-mir-iab-4 // 3R:12681997-12682064 (+) /// dme-mir-iab-8 // 3R:12681997-12682064 (-)
20500712	1.19512	0	A	1.19512	0	A	1.19512	0	A	1.19512	0	A	1.19512	0	A	1.42037	0.24911	A	1.19512	1.2702	0.940889	-0.087904	0.373901	AA	0	miRNA	miRBase	Drosophila melanogaster	dme-miR-iab-4-3p	3R:12682037-12682060 (+)	24	CGGUAUACCUUCAGUAUACGUAAC	MIMAT0000413_st	MIMAT0000413	FBtr0083362 // sense // exon // 3 /// FBtr0306338 // antisense // intron // 4 /// FBtr0306339 // antisense // intron // 4 /// FBtr0306340 // antisense // intron // 5 /// FBtr0309897 // antisense // intron // 5	dme-mir-iab-4 // 3R:12681997-12682064 (+) /// dme-mir-iab-8 // 3R:12681997-12682064 (-)
20500713	1.53981	0.12838	A	1.20484	-0.22553	A	1.2776	-0.14093	A	1.23713	-0.18738	A	1.70209	0.27293	P	1.67529	0.25004	A	1.34075	1.53817	0.871653	-0.198175	0.357114	PA	0	miRNA	miRBase	Homo sapiens	hsa-let-7g-5p	chr3:52302352-52302373 (-)	22	UGAGGUAGUAGUUUGUACAGUU	MIMAT0000414_st	MIMAT0000414	ENST00000296490 // sense // intron // 2 /// ENST00000362280 // sense // exon // 1 /// ENST00000463624 // sense // intron // 3 /// ENST00000469000 // sense // intron // 2 /// OTTHUMT00000317919 // sense // intron // 2 /// OTTHUMT00000350829 // sense // intron // 3 /// OTTHUMT00000350830 // sense // intron // 2	---
20500714	1.50489	0.16474	A	1.22122	-0.13658	A	1.35966	0.01834	A	1.32532	-0.01857	A	1.16267	-0.20747	A	1.80848	0.42986	P	1.36192	1.43216	0.95096	-0.0725438	0.81342	PA	0	miRNA	miRBase	Homo sapiens	hsa-let-7g-3p	chr3:52302296-52302316 (-)	21	CUGUACAGGCCACUGCCUUGC	MIMAT0004584_st	MIMAT0004584	ENST00000296490 // sense // intron // 2 /// ENST00000362280 // sense // exon // 1 /// ENST00000463624 // sense // intron // 3 /// ENST00000469000 // sense // intron // 2 /// OTTHUMT00000317919 // sense // intron // 2 /// OTTHUMT00000350829 // sense // intron // 3 /// OTTHUMT00000350830 // sense // intron // 2	---
20500715	2.19936	-0.12392	P	1.78942	-0.42151	A	2.52392	0.07466	P	2.75407	0.20056	P	5.48469	1.1944	P	2.26934	-0.07874	P	2.1709	3.5027	0.619779	-0.690174	0.222098	PA	0	miRNA	miRBase	Homo sapiens	hsa-let-7i-5p	chr12:62997471-62997492 (+)	22	UGAGGUAGUAGUUUGUGCUGUU	MIMAT0000415_st	MIMAT0000415	ENST00000362309 // sense // exon // 1 /// ENST00000550290 // sense // intron // 1 /// OTTHUMT00000406740 // antisense // 5UTR // 1 /// OTTHUMT00000406759 // sense // intron // 1	---
20500716	1.05048	0.02312	A	1.22847	0.24892	A	0.93088	-0.15127	A	1.01709	-0.02349	A	0.93626	-0.14295	A	1.49026	0.52763	A	1.06994	1.14787	0.932112	-0.101425	0.752059	AA	0	miRNA	miRBase	Homo sapiens	hsa-let-7i-3p	chr12:62997527-62997548 (+)	22	CUGCGCAAGCUACUGCCUUGCU	MIMAT0004585_st	MIMAT0004585	ENST00000362309 // sense // exon // 1 /// ENST00000550290 // sense // intron // 1 /// OTTHUMT00000406740 // antisense // 5UTR // 1 /// OTTHUMT00000406759 // sense // intron // 1	---
20500717	1.18524	-0.10336	A	1.27327	0	A	1.27327	0	A	1.27327	0	A	1.27327	0	A	1.33847	0.07204	A	1.24393	1.295	0.960559	-0.0580544	0.236271	AA	0	miRNA	miRBase	Homo sapiens	hsa-miR-1	chr18:19408976-19408997 (-) /// chr20:61151558-61151579 (+)	22	UGGAAUGUAAAGAAGUAUGUAU	MIMAT0000416_st	MIMAT0000416	ENST00000261537 // antisense // intron // 12 /// ENST00000578646 // antisense // intron // 12 /// ENST00000581072 // sense // exon // 3 /// ENST00000581613 // sense // exon // 3 /// OTTHUMT00000254675 // antisense // intron // 12 /// OTTHUMT00000445571 // sense // exon // 3 /// OTTHUMT00000445572 // sense // exon // 3 /// OTTHUMT00000445642 // antisense // intron // 12 /// ENST00000362147 // sens…	hsa-mir-1-2 // chr18:19408965-19409049 (-) /// hsa-mir-133a-1 // chr18:19405659-19405746 (-)
20500718	1.85546	0.19701	P	1.41422	-0.19476	A	1.32731	-0.28626	A	1.45565	-0.1531	A	1.93667	0.25882	P	1.78159	0.1384	P	1.53233	1.72464	0.888494	-0.170565	0.4114	PA	0	miRNA	miRBase	Homo sapiens	hsa-miR-15b-5p	chr3:160122395-160122416 (+)	22	UAGCAGCACAUCAUGGUUUACA	MIMAT0000417_st	MIMAT0000417	ENST00000344722 // sense // intron // 4 /// ENST00000357388 // sense // intron // 5 /// ENST00000360111 // sense // intron // 5 /// ENST00000462787 // sense // intron // 4 /// ENST00000467468 // sense // intron // 4 /// ENST00000468653 // sense // intron // 5 /// ENST00000469762 // sense // intron // 5 /// ENST00000469858 // sense // intron // 3 /// ENST00000470240 // sense // intron // 2 /// ENS…	hsa-mir-16-2 // chr3:160122533-160122613 (+) /// hsa-mir-15b // chr3:160122376-160122473 (+)
20500719	1.16609	0.01541	A	1.10668	-0.06003	A	1.33349	0.20894	A	1.14131	-0.01557	A	1.10668	-0.06003	A	1.16609	0.01541	A	1.20209	1.13803	1.05629	0.0790065	0.418424	AA	0	miRNA	miRBase	Homo sapiens	hsa-miR-15b-3p	chr3:160122433-160122454 (+)	22	CGAAUCAUUAUUUGCUGCUCUA	MIMAT0004586_st	MIMAT0004586	ENST00000344722 // sense // intron // 4 /// ENST00000357388 // sense // intron // 5 /// ENST00000360111 // sense // intron // 5 /// ENST00000462787 // sense // intron // 4 /// ENST00000467468 // sense // intron // 4 /// ENST00000468653 // sense // intron // 5 /// ENST00000469762 // sense // intron // 5 /// ENST00000469858 // sense // intron // 3 /// ENST00000470240 // sense // intron // 2 /// ENS…	hsa-mir-16-2 // chr3:160122533-160122613 (+) /// hsa-mir-15b // chr3:160122376-160122473 (+)
20500720	1.26067	0	A	1.21701	-0.05085	A	1.26067	0	A	1.26067	0	A	1.79245	0.50774	P	1.26067	0	A	1.24612	1.43793	0.866605	-0.206554	0.335156	PA	0	miRNA	miRBase	Homo sapiens	hsa-miR-23b-5p	chr9:97847509-97847530 (+)	22	UGGGUUCCUGGCAUGCUGAUUU	MIMAT0004587_st	MIMAT0004587	ENST00000297979 // sense // intron // 14 /// ENST00000375315 // sense // intron // 15 /// ENST00000428313 // sense // intron // 15 /// ENST00000463372 // sense // intron // 5 /// ENST00000468164 // sense // intron // 4 /// ENST00000471978 // sense // intron // 5 /// ENST00000478473 // sense // intron // 6 /// OTTHUMT00000053196 // sense // intron // 5 /// OTTHUMT00000053197 // sense // intron // …	hsa-mir-24-1 // chr9:97848303-97848370 (+) /// hsa-mir-23b // chr9:97847490-97847586 (+) /// hsa-mir-27b // chr9:97847727-97847823 (+) /// hsa-mir-3074 // chr9:97848296-97848376 (-)
20500721	16.093	3.44468	P	1.29806	-0.18733	A	1.47804	0	P	1.41001	-0.06797	A	25.1719	4.09006	P	1.47804	0	A	6.28971	9.35333	0.672456	-0.572487	0.894936	PA	0	miRNA	miRBase	Homo sapiens	hsa-miR-23b-3p	chr9:97847547-97847567 (+)	21	AUCACAUUGCCAGGGAUUACC	MIMAT0000418_st	MIMAT0000418	ENST00000297979 // sense // intron // 14 /// ENST00000375315 // sense // intron // 15 /// ENST00000428313 // sense // intron // 15 /// ENST00000463372 // sense // intron // 5 /// ENST00000468164 // sense // intron // 4 /// ENST00000471978 // sense // intron // 5 /// ENST00000478473 // sense // intron // 6 /// OTTHUMT00000053196 // sense // intron // 5 /// OTTHUMT00000053197 // sense // intron // …	hsa-mir-24-1 // chr9:97848303-97848370 (+) /// hsa-mir-23b // chr9:97847490-97847586 (+) /// hsa-mir-27b // chr9:97847727-97847823 (+) /// hsa-mir-3074 // chr9:97848296-97848376 (-)
20500722	1.17627	-0.09726	A	1.22847	-0.03462	A	1.28814	0.03381	A	1.28814	0.03381	A	1.04837	-0.26333	A	1.39911	0.15303	A	1.23096	1.24521	0.988559	-0.0166013	0.958349	AA	0	miRNA	miRBase	Homo sapiens	hsa-miR-27b-5p	chr9:97847745-97847766 (+)	22	AGAGCUUAGCUGAUUGGUGAAC	MIMAT0004588_st	MIMAT0004588	ENST00000297979 // sense // intron // 14 /// ENST00000375315 // sense // intron // 15 /// ENST00000428313 // sense // intron // 15 /// ENST00000463372 // sense // intron // 5 /// ENST00000468164 // sense // intron // 4 /// ENST00000471978 // sense // intron // 5 /// ENST00000478473 // sense // intron // 6 /// OTTHUMT00000053196 // sense // intron // 5 /// OTTHUMT00000053197 // sense // intron // …	hsa-mir-24-1 // chr9:97848303-97848370 (+) /// hsa-mir-23b // chr9:97847490-97847586 (+) /// hsa-mir-27b // chr9:97847727-97847823 (+) /// hsa-mir-3074 // chr9:97848296-97848376 (-)
20500723	1.76461	0.22467	P	1.25842	-0.26306	A	1.30236	-0.21354	A	1.49628	-0.0133	A	2.21767	0.55437	P	1.52399	0.01318	A	1.4418	1.74598	0.825781	-0.276169	0.327861	PA	0	miRNA	miRBase	Homo sapiens	hsa-miR-27b-3p	chr9:97847787-97847807 (+)	21	UUCACAGUGGCUAAGUUCUGC	MIMAT0000419_st	MIMAT0000419	ENST00000297979 // sense // intron // 14 /// ENST00000375315 // sense // intron // 15 /// ENST00000428313 // sense // intron // 15 /// ENST00000463372 // sense // intron // 5 /// ENST00000468164 // sense // intron // 4 /// ENST00000471978 // sense // intron // 5 /// ENST00000478473 // sense // intron // 6 /// OTTHUMT00000053196 // sense // intron // 5 /// OTTHUMT00000053197 // sense // intron // …	hsa-mir-24-1 // chr9:97848303-97848370 (+) /// hsa-mir-23b // chr9:97847490-97847586 (+) /// hsa-mir-27b // chr9:97847727-97847823 (+) /// hsa-mir-3074 // chr9:97848296-97848376 (-)
20500724	1.66796	0.21718	P	1.47291	0.03776	A	1.31087	-0.13038	A	1.42347	-0.01149	A	1.44624	0.0114	A	1.25951	-0.18804	A	1.48391	1.37641	1.07811	0.1085	0.428735	PA	0	miRNA	miRBase	Homo sapiens	hsa-miR-30b-5p	chr8:135812813-135812834 (-)	22	UGUAAACAUCCUACACUCAGCU	MIMAT0000420_st	MIMAT0000420	---	hsa-mir-30d // chr8:135817119-135817188 (-) /// hsa-mir-30b // chr8:135812763-135812850 (-)
20500725	1.83851	0.47126	P	1.42389	0.10256	A	1.68134	0.34234	A	0.99281	-0.41769	A	1.226	-0.11332	A	1.22847	-0.11041	A	1.64791	1.14909	1.4341	0.520144	0.0249986	PA	0	miRNA	miRBase	Homo sapiens	hsa-miR-30b-3p	chr8:135812775-135812796 (-)	22	CUGGGAGGUGGAUGUUUACUUC	MIMAT0004589_st	MIMAT0004589	---	hsa-mir-30d // chr8:135817119-135817188 (-) /// hsa-mir-30b // chr8:135812763-135812850 (-)
20500726	2.39632	-0.59087	P	32.4847	3.17	P	3.47785	-0.05349	P	18.1642	2.33134	P	3.74059	0.05158	P	2.93715	-0.29727	P	12.7863	8.28064	1.54412	0.626784	0.923497	PP	0	miRNA	miRBase	Homo sapiens	hsa-miR-122-5p	chr18:56118320-56118341 (+)	22	UGGAGUGUGACAAUGGUGUUUG	MIMAT0000421_st	MIMAT0000421	---	hsa-mir-122 // chr18:56118306-56118390 (+) /// hsa-mir-3591 // chr18:56118312-56118384 (-)
20500727	1.03825	-0.12467	A	1.25424	0.14798	A	1.19512	0.07833	A	1.04156	-0.12008	A	1.06881	-0.08283	A	1.1992	0.08324	A	1.16254	1.10319	1.0538	0.0755949	0.513202	AA	0	miRNA	miRBase	Homo sapiens	hsa-miR-122-3p	chr18:56118356-56118377 (+)	22	AACGCCAUUAUCACACUAAAUA	MIMAT0004590_st	MIMAT0004590	---	hsa-mir-122 // chr18:56118306-56118390 (+) /// hsa-mir-3591 // chr18:56118312-56118384 (-)
20500728	1.18133	0.1129	A	1.18133	0.1129	A	1.0924	0	A	1.01017	-0.1129	A	1.0924	0	A	1.0924	0	A	1.15169	1.06499	1.08141	0.112908	0.101191	AA	0	miRNA	miRBase	Homo sapiens	hsa-miR-124-5p	chr20:61809866-61809887 (+) /// chr8:9760948-9760969 (-) /// chr8:65291730-65291751 (+)	22	CGUGUUCACAGCGGACCUUGAU	MIMAT0004591_st	MIMAT0004591	ENST00000517675 // sense // exon // 1 /// ENST00000521242 // sense // exon // 4 /// ENST00000521863 // sense // exon // 3 /// OTTHUMT00000375047 // sense // exon // 1 /// OTTHUMT00000376963 // sense // exon // 3 /// OTTHUMT00000376964 // sense // exon // 4 /// ENST00000519741 // sense // intron // 1 /// ENST00000521441 // sense // intron // 2 /// OTTHUMT00000378434 // sense // intron // 2 /// OTT…	---
20500729	1.15985	-0.21053	A	1.27212	-0.07724	A	1.41204	0.07331	A	1.52903	0.18814	A	1.22341	-0.13356	A	1.52903	0.18814	A	1.28134	1.42716	0.897825	-0.155494	0.322035	AA	0	miRNA	miRBase	Homo sapiens	hsa-miR-124-3p	chr20:61809904-61809923 (+) /// chr8:9760911-9760930 (-) /// chr8:65291767-65291786 (+)	20	UAAGGCACGCGGUGAAUGCC	MIMAT0000422_st	MIMAT0000422	ENST00000517675 // sense // exon // 1 /// ENST00000521242 // sense // exon // 4 /// ENST00000521863 // sense // exon // 3 /// OTTHUMT00000375047 // sense // exon // 1 /// OTTHUMT00000376963 // sense // exon // 3 /// OTTHUMT00000376964 // sense // exon // 4 /// ENST00000519741 // sense // intron // 1 /// ENST00000521441 // sense // intron // 2 /// OTTHUMT00000378434 // sense // intron // 2 /// OTT…	---
20500730	6.22573	2.07227	P	1.54615	0.06271	A	1.41462	-0.06556	A	1.39077	-0.09009	A	8.81032	2.57322	P	1.39089	-0.08996	A	3.06217	3.86399	0.792488	-0.33554	0.928239	PA	0	miRNA	miRBase	Homo sapiens	hsa-miR-125b-5p	chr11:121970517-121970538 (-) /// chr21:17962573-17962594 (+)	22	UCCCUGAGACCCUAACUUGUGA	MIMAT0000423_st	MIMAT0000423	ENST00000524376 // sense // intron // 1 /// ENST00000528986 // sense // intron // 1 /// ENST00000529823 // sense // intron // 1 /// ENST00000530955 // sense // intron // 1 /// ENST00000531071 // sense // intron // 2 /// ENST00000531381 // sense // intron // 1 /// ENST00000532315 // sense // intron // 1 /// ENST00000532319 // sense // intron // 1 /// ENST00000532890 // sense // intron // 2 /// ENS…	---
20500731	1.22847	-0.1155	A	1.43325	0.10693	A	1.61702	0.28098	A	1.46066	0.13427	A	1.12409	-0.2436	A	1.12409	-0.2436	A	1.42625	1.23628	1.15366	0.206218	0.288309	AA	0	miRNA	miRBase	Homo sapiens	hsa-miR-125b-1-3p	chr11:121970477-121970498 (-)	22	ACGGGUUAGGCUCUUGGGAGCU	MIMAT0004592_st	MIMAT0004592	ENST00000524376 // sense // intron // 1 /// ENST00000528986 // sense // intron // 1 /// ENST00000529823 // sense // intron // 1 /// ENST00000530955 // sense // intron // 1 /// ENST00000531071 // sense // intron // 2 /// ENST00000531381 // sense // intron // 1 /// ENST00000532315 // sense // intron // 1 /// ENST00000532319 // sense // intron // 1 /// ENST00000532890 // sense // intron // 2 /// ENS…	---
20500732	2.14585	0.58935	A	1.08074	-0.40018	A	2.41356	0.75896	P	1.11096	-0.3604	A	1.7415	0.28812	A	0.96484	-0.56384	A	1.88005	1.27243	1.47752	0.563181	0.299533	PA	0	miRNA	miRBase	Homo sapiens	hsa-miR-128-1-5p	chr2:136422981-136423003 (+)	23	CGGGGCCGUAGCACUGUCUGAGA	MIMAT0026477_st	MIMAT0026477	ENST00000264160 // sense // intron // 18 /// ENST00000329971 // sense // intron // 15 /// ENST00000409478 // sense // intron // 15 /// ENST00000409606 // sense // intron // 18 /// ENST00000410054 // sense // intron // 15 /// ENST00000429703 // sense // intron // 7 /// OTTHUMT00000254659 // sense // intron // 18 /// OTTHUMT00000331545 // sense // intron // 15 /// OTTHUMT00000331546 // sense // int…	---
20500733	2.17157	0.58311	P	1.24079	-0.22437	A	1.44813	-0.00143	A	1.04005	-0.47897	A	1.51754	0.06611	A	1.45101	0.00143	A	1.62016	1.3362	1.21252	0.278003	0.43528	PA	0	miRNA	miRBase	Homo sapiens	hsa-miR-128-3p	chr2:136423016-136423036 (+) /// chr3:35786019-35786039 (+)	21	UCACAGUGAACCGGUCUCUUU	MIMAT0000424_st	MIMAT0000424	ENST00000264160 // sense // intron // 18 /// ENST00000329971 // sense // intron // 15 /// ENST00000409478 // sense // intron // 15 /// ENST00000409606 // sense // intron // 18 /// ENST00000410054 // sense // intron // 15 /// ENST00000429703 // sense // intron // 7 /// OTTHUMT00000254659 // sense // intron // 18 /// OTTHUMT00000331545 // sense // intron // 15 /// OTTHUMT00000331546 // sense // int…	---
20500734	1.22847	0.09464	A	1.05253	-0.12835	A	1.22131	0.08621	A	1.07962	-0.0917	A	1.23086	0.09745	A	1.06076	-0.11711	A	1.16744	1.12375	1.03888	0.0550274	0.612332	AA	0	miRNA	miRBase	Homo sapiens	hsa-miR-130a-5p	chr11:57408691-57408712 (+)	22	UUCACAUUGUGCUACUGUCUGC	MIMAT0004593_st	MIMAT0004593	ENST00000528466 // sense // intron // 1 /// ENST00000530595 // sense // intron // 1 /// OTTHUMT00000393362 // sense // intron // 1 /// OTTHUMT00000393363 // sense // intron // 1	---
20500735	1.29241	-0.00223	A	1.16876	-0.14731	A	1.77138	0.45259	P	1.2964	0.00223	A	1.15544	-0.16385	A	1.35196	0.06276	A	1.41085	1.26793	1.11272	0.154086	0.525762	PA	0	miRNA	miRBase	Homo sapiens	hsa-miR-130a-3p	chr11:57408725-57408746 (+)	22	CAGUGCAAUGUUAAAAGGGCAU	MIMAT0000425_st	MIMAT0000425	ENST00000528466 // sense // intron // 1 /// ENST00000530595 // sense // intron // 1 /// OTTHUMT00000393362 // sense // intron // 1 /// OTTHUMT00000393363 // sense // intron // 1	---
20500736	1.07155	-0.05619	A	1.19423	0.1002	A	1.07155	-0.05619	A	0.85907	-0.37504	A	1.15667	0.05409	A	1.17543	0.07731	A	1.11244	1.06372	1.0458	0.0646089	0.646893	AA	0	miRNA	miRBase	Homo sapiens	hsa-miR-132-5p	chr17:1953259-1953280 (-)	22	ACCGUGGCUUUCGAUUGUUACU	MIMAT0004594_st	MIMAT0004594	---	hsa-mir-212 // chr17:1953565-1953674 (-) /// hsa-mir-132 // chr17:1953202-1953302 (-)
20500737	1.19512	0	A	1.19512	0	A	1.19512	0	A	1.19512	0	A	1.19512	0	A	1.19512	0	A	1.19512	1.19512	1	0	1	AA	0	miRNA	miRBase	Homo sapiens	hsa-miR-132-3p	chr17:1953223-1953244 (-)	22	UAACAGUCUACAGCCAUGGUCG	MIMAT0000426_st	MIMAT0000426	---	hsa-mir-212 // chr17:1953565-1953674 (-) /// hsa-mir-132 // chr17:1953202-1953302 (-)
20500738	1.25733	-0.01679	A	1.11761	-0.18673	A	1.30348	0.03522	A	1.13213	-0.16811	A	1.30348	0.03522	A	1.28676	0.01659	A	1.22614	1.24079	0.988193	-0.0171352	0.861631	AA	0	miRNA	miRBase	Homo sapiens	hsa-miR-133a-5p	chr18:19405710-19405731 (-)	22	AGCUGGUAAAAUGGAACCAAAU	MIMAT0026478_st	MIMAT0026478	ENST00000261537 // antisense // intron // 12 /// ENST00000578646 // antisense // intron // 12 /// ENST00000581072 // sense // exon // 3 /// OTTHUMT00000254675 // antisense // intron // 12 /// OTTHUMT00000445571 // sense // exon // 3 /// OTTHUMT00000445642 // antisense // intron // 12 /// ENST00000370523 // sense // intron // 1 /// ENST00000370524 // sense // intron // 2 /// ENST00000370527 // sen…	hsa-mir-1-2 // chr18:19408965-19409049 (-) /// hsa-mir-133a-1 // chr18:19405659-19405746 (-)
20500739	6.80261	2.52819	P	1.05177	-0.16508	A	6.13206	2.37847	P	1.03204	-0.1924	A	1.17927	0	A	1.17927	0	A	4.66215	1.13019	4.12509	2.04442	0.133745	PA	0	miRNA	miRBase	Homo sapiens	hsa-miR-133a-3p	chr18:19405673-19405694 (-) /// chr20:61162177-61162198 (+)	22	UUUGGUCCCCUUCAACCAGCUG	MIMAT0000427_st	MIMAT0000427	ENST00000261537 // antisense // intron // 12 /// ENST00000578646 // antisense // intron // 12 /// ENST00000581072 // sense // exon // 3 /// OTTHUMT00000254675 // antisense // intron // 12 /// OTTHUMT00000445571 // sense // exon // 3 /// OTTHUMT00000445642 // antisense // intron // 12 /// ENST00000370523 // sense // intron // 1 /// ENST00000370524 // sense // intron // 2 /// ENST00000370527 // sen…	hsa-mir-1-2 // chr18:19408965-19409049 (-) /// hsa-mir-133a-1 // chr18:19405659-19405746 (-)
20500740	1.11167	-0.03462	A	0.96554	-0.23795	A	1.36318	0.25961	A	1.16568	0.03381	A	1.16568	0.03381	A	1.11167	-0.03462	A	1.1468	1.14768	0.999233	-0.00110663	0.921611	AA	0	miRNA	miRBase	Homo sapiens	hsa-miR-135a-5p	chr12:97957612-97957634 (+) /// chr3:52328286-52328308 (-)	23	UAUGGCUUUUUAUUCCUAUGUGA	MIMAT0000428_st	MIMAT0000428	ENST00000354773 // antisense // exon // 4 /// ENST00000467187 // sense // intron // 1 /// ENST00000493616 // sense // intron // 1 /// OTTHUMT00000350824 // sense // intron // 1 /// OTTHUMT00000350826 // sense // intron // 1 /// ENST00000538559 // sense // intron // 12 /// OTTHUMT00000407671 // sense // intron // 12 /// OTTHUMT00000407677 // antisense // exon // 1	---
20500741	5.75806	1.13895	P	2.36636	-0.14396	P	6.92494	1.40517	P	1.52713	-0.77581	P	2.863	0.13089	P	1.60928	-0.70021	P	5.01645	1.9998	2.50847	1.32681	0.0894865	PP	0	miRNA	miRBase	Homo sapiens	hsa-miR-135a-3p	chr3:52328248-52328269 (-)	22	UAUAGGGAUUGGAGCCGUGGCG	MIMAT0004595_st	MIMAT0004595	ENST00000354773 // antisense // exon // 4 /// ENST00000467187 // sense // intron // 1 /// ENST00000493616 // sense // intron // 1 /// OTTHUMT00000350824 // sense // intron // 1 /// OTTHUMT00000350826 // sense // intron // 1	---
20500742	1.05048	-0.1129	A	1.136	0	A	1.136	0	A	1.22847	0.1129	A	1.136	0	A	1.136	0	A	1.10749	1.16682	0.949153	-0.0752881	0.2302	AA	0	miRNA	miRBase	Homo sapiens	hsa-miR-137	chr1:98511647-98511669 (-)	23	UUAUUGCUUAAGAAUACGCGUAG	MIMAT0000429_st	MIMAT0000429	ENST00000424528 // sense // exon // 3 /// ENST00000602852 // sense // exon // 1 /// ENST00000602984 // sense // exon // 1 /// OTTHUMT00000029437 // sense // exon // 3 /// OTTHUMT00000467512 // sense // exon // 1 /// OTTHUMT00000467513 // sense // exon // 1	hsa-mir-137 // chr1:98511626-98511727 (-) /// hsa-mir-2682 // chr1:98510798-98510907 (-)
20500743	2.24273	0.37632	P	1.68606	-0.03528	A	6.06052	1.81051	P	1.34614	-0.36011	A	1.76953	0.03444	A	1.33954	-0.36719	A	3.32977	1.48507	2.24216	1.16489	0.174477	PA	0	miRNA	miRBase	Homo sapiens	hsa-miR-138-5p	chr16:56892439-56892461 (+) /// chr3:44155726-44155748 (+)	23	AGCUGGUGUUGUGAAUCAGGCCG	MIMAT0000430_st	MIMAT0000430	---	---
20500744	1.1466	-0.09949	A	1.22847	0	A	1.67699	0.44902	A	1.22847	0	A	1.48402	0.27266	A	1.11788	-0.1361	A	1.35069	1.27679	1.05788	0.0811718	0.749074	AA	0	miRNA	miRBase	Homo sapiens	hsa-miR-138-2-3p	chr16:56892486-56892507 (+)	22	GCUAUUUCACGACACCAGGGUU	MIMAT0004596_st	MIMAT0004596	---	---
20500745	1.29219	0.2169	A	1.1227	0.01404	A	0.96004	-0.21176	A	1.10095	-0.01418	A	1.01807	-0.12708	A	1.1675	0.07049	A	1.12498	1.09551	1.0269	0.0382968	0.836757	AA	0	miRNA	miRBase	Homo sapiens	hsa-miR-140-5p	chr16:69967006-69967027 (+)	22	CAGUGGUUUUACCCUAUGGUAG	MIMAT0000431_st	MIMAT0000431	ENST00000356003 // sense // intron // 15 /// ENST00000359154 // sense // intron // 16 /// ENST00000448661 // sense // intron // 16 /// ENST00000542271 // sense // intron // 13 /// ENST00000544162 // sense // intron // 14 /// ENST00000566463 // sense // intron // 7 /// ENST00000568684 // sense // intron // 6 /// ENST00000568818 // sense // intron // 3 /// ENST00000569297 // sense // intron // 9 //…	---
20500746	48.2629	2.71503	P	3.06637	-1.26128	P	19.856	1.4337	P	1.41222	-2.37984	A	11.6343	0.6625	P	1.59238	-2.20662	A	23.7284	4.87963	4.86275	2.28177	0.212407	PA	0	miRNA	miRBase	Homo sapiens	hsa-miR-140-3p	chr16:69967045-69967065 (+)	21	UACCACAGGGUAGAACCACGG	MIMAT0004597_st	MIMAT0004597	ENST00000356003 // sense // intron // 15 /// ENST00000359154 // sense // intron // 16 /// ENST00000448661 // sense // intron // 16 /// ENST00000542271 // sense // intron // 13 /// ENST00000544162 // sense // intron // 14 /// ENST00000566463 // sense // intron // 7 /// ENST00000568684 // sense // intron // 6 /// ENST00000568818 // sense // intron // 3 /// ENST00000569297 // sense // intron // 9 //…	---
20500747	1.17665	-0.00745	A	1.32583	0.16476	A	1.11226	-0.08864	A	1.18884	0.00741	A	1.04871	-0.17353	A	1.39905	0.24231	A	1.20491	1.2122	0.993989	-0.00869837	0.986703	AA	0	miRNA	miRBase	Homo sapiens	hsa-miR-141-5p	chr12:7073276-7073297 (+)	22	CAUCUUCCAGUACAGUGUUGGA	MIMAT0004598_st	MIMAT0004598	ENST00000537269 // sense // intron // 1 /// OTTHUMT00000402989 // sense // intron // 1	hsa-mir-141 // chr12:7073260-7073354 (+) /// hsa-mir-200c // chr12:7072862-7072929 (+)
20500748	1.32561	0.07319	A	1.27511	0.01716	A	1.19769	-0.07321	A	1.25504	-0.00573	A	1.26504	0.00571	A	1.22847	-0.03661	A	1.26614	1.24952	1.0133	0.019063	0.707608	AA	0	miRNA	miRBase	Homo sapiens	hsa-miR-141-3p	chr12:7073318-7073339 (+)	22	UAACACUGUCUGGUAAAGAUGG	MIMAT0000432_st	MIMAT0000432	ENST00000537269 // sense // intron // 1 /// OTTHUMT00000402989 // sense // intron // 1	hsa-mir-141 // chr12:7073260-7073354 (+) /// hsa-mir-200c // chr12:7072862-7072929 (+)
20500749	1.35967	0.07135	A	1.22847	-0.07506	A	1.4385	0.15265	A	1.07964	-0.26137	A	1.16115	-0.15637	A	1.56861	0.27757	A	1.34221	1.2698	1.05703	0.0800127	0.616784	AA	0	miRNA	miRBase	Homo sapiens	hsa-miR-142-5p	chr17:56408644-56408664 (-)	21	CAUAAAGUAGAAAGCACUACU	MIMAT0000433_st	MIMAT0000433	ENST00000578334 // antisense // intron // 1 /// ENST00000579003 // sense // exon // 1 /// ENST00000579527 // antisense // intron // 2 /// ENST00000580515 // antisense // intron // 1 /// ENST00000580633 // antisense // intron // 1 /// OTTHUMT00000443987 // antisense // intron // 2 /// OTTHUMT00000443988 // antisense // intron // 1 /// OTTHUMT00000443989 // antisense // intron // 1 /// OTTHUMT00000…	hsa-mir-142 // chr17:56408593-56408679 (-) /// hsa-mir-4736 // chr17:56413337-56413383 (-)
20500750	1.17367	0.0678	A	1.21183	0.11396	A	1.22847	0.13363	A	1.05048	-0.09217	A	1.05048	-0.09217	A	1.06591	-0.07114	A	1.20466	1.05562	1.14118	0.190527	0.000782401	AA	0	miRNA	miRBase	Homo sapiens	hsa-miR-142-3p	chr17:56408606-56408628 (-)	23	UGUAGUGUUUCCUACUUUAUGGA	MIMAT0000434_st	MIMAT0000434	ENST00000578334 // antisense // intron // 1 /// ENST00000579003 // sense // exon // 1 /// ENST00000579527 // antisense // intron // 2 /// ENST00000580515 // antisense // intron // 1 /// ENST00000580633 // antisense // intron // 1 /// OTTHUMT00000443987 // antisense // intron // 2 /// OTTHUMT00000443988 // antisense // intron // 1 /// OTTHUMT00000443989 // antisense // intron // 1 /// OTTHUMT00000…	hsa-mir-142 // chr17:56408593-56408679 (-) /// hsa-mir-4736 // chr17:56413337-56413383 (-)
20500751	1.23462	-0.02483	A	1.34407	0.09771	A	1.23462	-0.02483	A	1.27749	0.02441	A	1.48402	0.24062	A	1.0924	-0.20139	A	1.2711	1.28464	0.989465	-0.0152791	0.97092	AA	0	miRNA	miRBase	Homo sapiens	hsa-miR-143-5p	chr5:148808507-148808528 (+)	22	GGUGCAGUGCUGCAUCUCUGGU	MIMAT0004599_st	MIMAT0004599	---	hsa-mir-143 // chr5:148808481-148808586 (+) /// hsa-mir-145 // chr5:148810209-148810296 (+)
20500752	1.70883	0.49592	P	1.17718	-0.04175	A	1.24631	0.04058	A	1.17718	-0.04175	A	1.58835	0.39044	A	1.03069	-0.23348	A	1.37744	1.26541	1.08854	0.122388	0.638137	PA	0	miRNA	miRBase	Homo sapiens	hsa-miR-143-3p	chr5:148808541-148808561 (+)	21	UGAGAUGAAGCACUGUAGCUC	MIMAT0000435_st	MIMAT0000435	---	hsa-mir-143 // chr5:148808481-148808586 (+) /// hsa-mir-145 // chr5:148810209-148810296 (+)
20500753	1.38148	0.05535	A	1.27749	-0.05756	A	1.4436	0.11881	A	1.393	0.06733	A	1.27749	-0.05756	A	1.18133	-0.17046	A	1.36752	1.28394	1.0651	0.0909877	0.342413	AA	0	miRNA	miRBase	Homo sapiens	hsa-miR-144-5p	chr17:27188601-27188622 (-)	22	GGAUAUCAUCAUAUACUGUAAG	MIMAT0004600_st	MIMAT0004600	ENST00000582320 // sense // exon // 1 /// OTTHUMT00000446722 // sense // exon // 1	hsa-mir-144 // chr17:27188551-27188636 (-) /// hsa-mir-451a // chr17:27188387-27188458 (-) /// hsa-mir-451b // chr17:27188389-27188456 (+) /// hsa-mir-4732 // chr17:27188673-27188748 (-)
20500754	1.22847	0	A	1.22847	0	A	1.22847	0	A	1.22847	0	A	1.22847	0	A	1.22847	0	A	1.22847	1.22847	1	0	1	AA	0	miRNA	miRBase	Homo sapiens	hsa-miR-144-3p	chr17:27188566-27188585 (-)	20	UACAGUAUAGAUGAUGUACU	MIMAT0000436_st	MIMAT0000436	ENST00000582320 // sense // exon // 1 /// OTTHUMT00000446722 // sense // exon // 1	hsa-mir-144 // chr17:27188551-27188636 (-) /// hsa-mir-451a // chr17:27188387-27188458 (-) /// hsa-mir-451b // chr17:27188389-27188456 (+) /// hsa-mir-4732 // chr17:27188673-27188748 (-)
20500755	25.3711	4.27614	P	1.27155	-0.04239	A	1.34738	0.04118	P	1.10002	-0.25144	A	49.261	5.2334	P	1.27155	-0.04239	A	9.33001	17.2109	0.5421	-0.883368	0.927643	PA	0	miRNA	miRBase	Homo sapiens	hsa-miR-145-5p	chr5:148810224-148810246 (+)	23	GUCCAGUUUUCCCAGGAAUCCCU	MIMAT0000437_st	MIMAT0000437	ENST00000602315 // sense // exon // 1 /// OTTHUMT00000468029 // sense // exon // 1	hsa-mir-143 // chr5:148808481-148808586 (+) /// hsa-mir-145 // chr5:148810209-148810296 (+)
20500756	1.22847	0	A	1.73546	0.49846	A	1.22847	0	A	1.15173	-0.09305	A	1.05048	-0.2258	A	1.34687	0.13275	A	1.39747	1.18303	1.18126	0.240331	0.309831	AA	0	miRNA	miRBase	Homo sapiens	hsa-miR-145-3p	chr5:148810262-148810283 (+)	22	GGAUUCCUGGAAAUACUGUUCU	MIMAT0004601_st	MIMAT0004601	ENST00000602315 // sense // exon // 1 /// OTTHUMT00000468029 // sense // exon // 1	hsa-mir-143 // chr5:148808481-148808586 (+) /// hsa-mir-145 // chr5:148810209-148810296 (+)
20500757	1.14015	-0.10764	A	1.27067	0.04873	A	1.22847	0	A	1.32363	0.10764	A	1.22847	0	A	1.22847	0	A	1.2131	1.26019	0.96263	-0.0549467	0.396319	AA	0	miRNA	miRBase	Homo sapiens	hsa-miR-152-5p	chr17:46114576-46114598 (-)	23	AGGUUCUGUGAUACACUCCGACU	MIMAT0026479_st	MIMAT0026479	ENST00000006101 // sense // intron // 2 /// ENST00000580174 // sense // intron // 1 /// ENST00000582553 // sense // intron // 1 /// ENST00000584666 // sense // intron // 1 /// OTTHUMT00000442953 // sense // intron // 1 /// OTTHUMT00000442955 // sense // intron // 1 /// OTTHUMT00000442957 // sense // intron // 1	---
20500758	2.91504	1.22329	P	1.05722	-0.23994	A	1.24853	0	P	1.24853	0	A	1.22452	-0.028	A	1.47003	0.23562	A	1.74026	1.31436	1.32404	0.404945	0.604592	PA	0	miRNA	miRBase	Homo sapiens	hsa-miR-152-3p	chr17:46114540-46114560 (-)	21	UCAGUGCAUGACAGAACUUGG	MIMAT0000438_st	MIMAT0000438	ENST00000006101 // sense // intron // 2 /// ENST00000580174 // sense // intron // 1 /// ENST00000582553 // sense // intron // 1 /// ENST00000584666 // sense // intron // 1 /// OTTHUMT00000442953 // sense // intron // 1 /// OTTHUMT00000442955 // sense // intron // 1 /// OTTHUMT00000442957 // sense // intron // 1	---
20500759	1.22847	0	A	1.22847	0	A	1.39641	0.18487	A	1.22847	0	A	1.22847	0	A	1.22847	0	A	1.28445	1.22847	1.04557	0.0642881	0.373901	AA	0	miRNA	miRBase	Homo sapiens	hsa-miR-153-3p	chr2:220158848-220158869 (-) /// chr7:157367041-157367062 (-)	22	UUGCAUAGUCACAAAAGUGAUC	MIMAT0000439_st	MIMAT0000439	ENST00000295718 // sense // intron // 19 /// ENST00000409251 // sense // intron // 18 /// ENST00000423636 // sense // intron // 20 /// ENST00000443981 // sense // intron // 2 /// ENST00000462351 // sense // intron // 16 /// ENST00000497977 // sense // intron // 4 /// ENST00000537666 // sense // intron // 17 /// OTTHUMT00000256819 // sense // intron // 19 /// OTTHUMT00000335543 // sense // intron …	---
20500760	0.91239	-0.45889	A	1.23897	-0.01748	A	1.05048	-0.25556	A	1.26917	0.01727	A	1.26917	0.01727	A	1.50907	0.26704	A	1.06728	1.34914	0.791084	-0.338098	0.086516	AA	0	miRNA	miRBase	Homo sapiens	hsa-miR-153-5p	chr7:157367079-157367100 (-)	22	UCAUUUUUGUGAUGUUGCAGCU	MIMAT0026480_st	MIMAT0026480	ENST00000389413 // sense // intron // 18 /// ENST00000389416 // sense // intron // 18 /// ENST00000389418 // sense // intron // 19 /// ENST00000404321 // sense // intron // 19 /// ENST00000409483 // sense // intron // 18 /// OTTHUMT00000327120 // sense // intron // 18 /// OTTHUMT00000327121 // sense // intron // 18 /// OTTHUMT00000353213 // sense // intron // 18 /// OTTHUMT00000353214 // sense //…	---
20500761	221.209	1.94643	P	29.9132	-0.94013	P	84.8758	0.56444	P	14.3315	-2.00172	P	143.705	1.32413	P	1.46066	-5.29622	A	111.999	53.1657	2.10661	1.07492	0.294215	PA	0	miRNA	miRBase	Homo sapiens	hsa-miR-191-5p	chr3:49058105-49058127 (-)	23	CAACGGAAUCCCAAAAGCAGCUG	MIMAT0000440_st	MIMAT0000440	ENST00000313778 // sense // intron // 1 /// ENST00000326912 // antisense // intron // 1 /// ENST00000440857 // sense // intron // 1 /// ENST00000492585 // sense // intron // 1 /// ENST00000496568 // sense // intron // 1 /// OTTHUMT00000345586 // sense // intron // 1 /// OTTHUMT00000345587 // sense // intron // 1 /// OTTHUMT00000345595 // sense // intron // 1 /// OTTHUMT00000345596 // sense // int…	hsa-mir-191 // chr3:49058051-49058142 (-) /// hsa-mir-425 // chr3:49057581-49057667 (-)
20500762	2.22595	0.411	A	1.66678	-0.00636	A	5.95136	1.8298	P	1.37025	-0.28898	A	1.68151	0.00633	A	1.33851	-0.3228	A	3.28136	1.46342	2.24225	1.16495	0.169424	PA	0	miRNA	miRBase	Homo sapiens	hsa-miR-191-3p	chr3:49058064-49058085 (-)	22	GCUGCGCUUGGAUUUCGUCCCC	MIMAT0001618_st	MIMAT0001618	ENST00000313778 // sense // intron // 1 /// ENST00000326912 // antisense // intron // 1 /// ENST00000440857 // sense // intron // 1 /// ENST00000492585 // sense // intron // 1 /// ENST00000496568 // sense // intron // 1 /// OTTHUMT00000345586 // sense // intron // 1 /// OTTHUMT00000345587 // sense // intron // 1 /// OTTHUMT00000345595 // sense // intron // 1 /// OTTHUMT00000345596 // sense // int…	hsa-mir-191 // chr3:49058051-49058142 (-) /// hsa-mir-425 // chr3:49057581-49057667 (-)
20500763	1.2033	0.02587	A	1.7821	0.59246	A	1.16052	-0.02635	A	1.04529	-0.17722	A	1.07246	-0.1402	A	1.2033	0.02587	A	1.38197	1.10702	1.24838	0.320053	0.229268	AA	0	miRNA	miRBase	Homo sapiens	hsa-miR-9-5p	chr1:156390184-156390206 (-) /// chr15:89911263-89911285 (+) /// chr5:87962720-87962742 (-)	23	UCUUUGGUUAUCUAGCUGUAUGA	MIMAT0000441_st	MIMAT0000441	ENST00000310027 // sense // intron // 2 /// ENST00000357975 // sense // intron // 2 /// ENST00000368243 // sense // intron // 2 /// ENST00000385198 // antisense // exon // 1 /// ENST00000400991 // sense // intron // 2 /// ENST00000463309 // sense // intron // 1 /// ENST00000464203 // sense // intron // 1 /// ENST00000465270 // sense // intron // 1 /// ENST00000471156 // sense // intron // 1 /// E…	---
20500764	1.34431	0.04313	A	1.08641	-0.26417	A	1.29175	-0.01441	A	1.27943	-0.02823	A	1.31768	0.01427	A	1.73272	0.4093	A	1.24082	1.44328	0.859727	-0.21805	0.279488	AA	0	miRNA	miRBase	Homo sapiens	hsa-miR-9-3p	chr1:156390146-156390167 (-) /// chr15:89911302-89911323 (+) /// chr5:87962684-87962705 (-)	22	AUAAAGCUAGAUAACCGAAAGU	MIMAT0000442_st	MIMAT0000442	ENST00000310027 // sense // intron // 2 /// ENST00000357975 // sense // intron // 2 /// ENST00000368243 // sense // intron // 2 /// ENST00000385198 // antisense // exon // 1 /// ENST00000400991 // sense // intron // 2 /// ENST00000463309 // sense // intron // 1 /// ENST00000464203 // sense // intron // 1 /// ENST00000465270 // sense // intron // 1 /// ENST00000471156 // sense // intron // 1 /// E…	---
20500765	4.7972	1.64063	P	1.48402	-0.05204	A	1.56772	0.02711	A	1.50935	-0.02763	A	18.7182	3.60481	P	1.22847	-0.3247	A	2.61631	7.152	0.365816	-1.45081	0.712442	PA	0	miRNA	miRBase	Homo sapiens	hsa-miR-125a-5p	chr19:52196521-52196544 (+)	24	UCCCUGAGACCCUUUAACCUGUGA	MIMAT0000443_st	MIMAT0000443	ENST00000602324 // antisense // exon // 1 /// OTTHUMT00000467329 // antisense // exon // 1	hsa-let-7e // chr19:52196039-52196117 (+) /// hsa-mir-125a // chr19:52196507-52196592 (+) /// hsa-mir-99b // chr19:52195865-52195934 (+)
20500766	1.51578	-0.05575	A	1.75721	0.15748	A	1.46066	-0.10918	A	1.63521	0.05367	A	2.36687	0.58718	P	1.39607	-0.17443	A	1.57788	1.79938	0.876902	-0.189512	0.546275	PA	0	miRNA	miRBase	Homo sapiens	hsa-miR-125a-3p	chr19:52196559-52196580 (+)	22	ACAGGUGAGGUUCUUGGGAGCC	MIMAT0004602_st	MIMAT0004602	ENST00000602324 // antisense // exon // 1 /// OTTHUMT00000467329 // antisense // exon // 1	hsa-let-7e // chr19:52196039-52196117 (+) /// hsa-mir-125a // chr19:52196507-52196592 (+) /// hsa-mir-99b // chr19:52195865-52195934 (+)
20500767	1.3568	0.23148	A	1.16483	0.0114	A	1.3163	0.18776	A	1.03979	-0.15244	A	0.9632	-0.26282	A	1.1465	-0.01149	A	1.27931	1.04983	1.21859	0.28521	0.0447959	AA	0	miRNA	miRBase	Homo sapiens	hsa-miR-125b-2-3p	chr21:17962610-17962631 (+)	22	UCACAAGUCAGGCUCUUGGGAC	MIMAT0004603_st	MIMAT0004603	ENST00000400178 // sense // intron // 5 /// ENST00000418813 // sense // intron // 3 /// ENST00000428669 // sense // intron // 5 /// ENST00000441820 // sense // intron // 1 /// ENST00000445461 // sense // intron // 5 /// ENST00000453910 // sense // intron // 3 /// ENST00000456342 // sense // intron // 6 /// ENST00000458468 // sense // intron // 6 /// ENST00000602280 // sense // intron // 1 /// ENS…	---
20500768	1.17174	0	A	1.17174	0	A	1.17174	0	A	1.36896	0.22443	A	1.14239	-0.0366	A	1.5275	0.38252	A	1.17174	1.34628	0.870352	-0.20033	0.194742	AA	0	miRNA	miRBase	Homo sapiens	hsa-miR-126-5p	chr9:139565068-139565088 (+)	21	CAUUAUUACUUUUGGUACGCG	MIMAT0000444_st	MIMAT0000444	ENST00000308874 // sense // intron // 7 /// ENST00000371698 // sense // intron // 6 /// ENST00000371699 // sense // intron // 7 /// ENST00000406555 // sense // intron // 7 /// ENST00000492002 // sense // intron // 5 /// OTTHUMT00000055094 // sense // intron // 7 /// OTTHUMT00000055095 // sense // intron // 7 /// OTTHUMT00000055096 // sense // intron // 6 /// OTTHUMT00000055099 // sense // intron …	---
20500769	3.08798	0.76627	P	1.79255	-0.01838	P	1.83851	0.01815	P	1.61455	-0.16926	A	3.02046	0.73438	P	1.46066	-0.31376	A	2.23968	2.03189	1.10226	0.14047	0.701087	PA	0	miRNA	miRBase	Homo sapiens	hsa-miR-126-3p	chr9:139565105-139565126 (+)	22	UCGUACCGUGAGUAAUAAUGCG	MIMAT0000445_st	MIMAT0000445	ENST00000308874 // sense // intron // 7 /// ENST00000371698 // sense // intron // 6 /// ENST00000371699 // sense // intron // 7 /// ENST00000406555 // sense // intron // 7 /// ENST00000492002 // sense // intron // 5 /// OTTHUMT00000055094 // sense // intron // 7 /// OTTHUMT00000055095 // sense // intron // 7 /// OTTHUMT00000055096 // sense // intron // 6 /// OTTHUMT00000055099 // sense // intron …	---
20500770	1.24415	0.01827	A	1.11227	-0.14337	A	1.46066	0.24974	A	1.23628	0.00912	A	1.21298	-0.01833	A	1.2207	-0.00918	A	1.27236	1.22332	1.04009	0.0567051	0.698169	AA	0	miRNA	miRBase	Homo sapiens	hsa-miR-127-5p	chr14:101349338-101349359 (+)	22	CUGAAGCUCAGAGGGCUCUGAU	MIMAT0004604_st	MIMAT0004604	ENST00000534062 // antisense // exon // 1 /// OTTHUMT00000395127 // antisense // exon // 1	hsa-mir-127 // chr14:101349316-101349412 (+) /// hsa-mir-136 // chr14:101351039-101351120 (+) /// hsa-mir-337 // chr14:101340830-101340922 (+) /// hsa-mir-431 // chr14:101347344-101347457 (+) /// hsa-mir-433 // chr14:101348223-101348315 (+) /// hsa-mir-432 // chr14:101350820-101350913 (+) /// hsa-mir-665 // chr14:101341370-101341441 (+)
20500771	1.35113	0.05414	A	1.4747	0.18039	A	1.07444	-0.27643	A	1.44665	0.15269	A	1.12732	-0.20713	A	1.2516	-0.05625	A	1.30009	1.27519	1.01953	0.0278993	0.900144	AA	0	miRNA	miRBase	Homo sapiens	hsa-miR-127-3p	chr14:101349372-101349393 (+)	22	UCGGAUCCGUCUGAGCUUGGCU	MIMAT0000446_st	MIMAT0000446	ENST00000534062 // antisense // exon // 1 /// OTTHUMT00000395127 // antisense // exon // 1	hsa-mir-127 // chr14:101349316-101349412 (+) /// hsa-mir-136 // chr14:101351039-101351120 (+) /// hsa-mir-337 // chr14:101340830-101340922 (+) /// hsa-mir-431 // chr14:101347344-101347457 (+) /// hsa-mir-433 // chr14:101348223-101348315 (+) /// hsa-mir-432 // chr14:101350820-101350913 (+) /// hsa-mir-665 // chr14:101341370-101341441 (+)
20500772	1.36281	-0.15509	A	1.64336	0.11498	A	1.65728	0.12714	P	1.17697	-0.36659	A	1.55806	0.03808	P	1.47688	-0.03911	A	1.55448	1.40397	1.10721	0.146923	0.382192	PA	0	miRNA	miRBase	Homo sapiens	hsa-miR-129-2-3p	chr11:43603000-43603021 (+)	22	AAGCCCUUACCCCAAAAAGCAU	MIMAT0004605_st	MIMAT0004605	ENST00000526615 // sense // intron // 2 /// ENST00000532864 // sense // intron // 1 /// ENST00000533358 // sense // intron // 1 /// OTTHUMT00000389683 // sense // intron // 2 /// OTTHUMT00000389684 // sense // intron // 1 /// OTTHUMT00000389685 // sense // intron // 1	---
20500773	1.23358	-0.11552	A	1.23358	-0.11552	A	1.46066	0.12825	P	1.6035	0.26285	P	1.22847	-0.12151	A	1.43926	0.10696	A	1.30927	1.42374	0.919599	-0.120923	0.444365	PA	0	miRNA	miRBase	Homo sapiens	hsa-miR-134-5p	chr14:101521031-101521052 (+)	22	UGUGACUGGUUGACCAGAGGGG	MIMAT0000447_st	MIMAT0000447	ENST00000385258 // sense // exon // 1	hsa-mir-134 // chr14:101521024-101521096 (+) /// hsa-mir-154 // chr14:101526092-101526175 (+) /// hsa-mir-377 // chr14:101528387-101528455 (+) /// hsa-mir-381 // chr14:101512257-101512331 (+) /// hsa-mir-382 // chr14:101520643-101520718 (+) /// hsa-mir-485 // chr14:101521756-101521828 (+) /// hsa-mir-487a // chr14:101518783-101518862 (+) /// hsa-mir-496 // chr14:101526910-101527011 (+) /// hsa-mi…
20500774	1.34498	0.12077	A	1.24711	0.01179	A	1.22682	-0.01188	A	1.13489	-0.12425	A	1.06643	-0.21402	A	1.30666	0.07908	A	1.27297	1.16933	1.08864	0.12252	0.256949	AA	0	miRNA	miRBase	Homo sapiens	hsa-miR-134-3p	chr14:101521069-101521091 (+)	23	CCUGUGGGCCACCUAGUCACCAA	MIMAT0026481_st	MIMAT0026481	ENST00000385258 // sense // exon // 1	hsa-mir-134 // chr14:101521024-101521096 (+) /// hsa-mir-154 // chr14:101526092-101526175 (+) /// hsa-mir-377 // chr14:101528387-101528455 (+) /// hsa-mir-381 // chr14:101512257-101512331 (+) /// hsa-mir-382 // chr14:101520643-101520718 (+) /// hsa-mir-485 // chr14:101521756-101521828 (+) /// hsa-mir-487a // chr14:101518783-101518862 (+) /// hsa-mir-496 // chr14:101526910-101527011 (+) /// hsa-mi…
[truncated: 35,474 more rows]
